# Supplementary material for: Gut microbiota composition reflects disease severity and dysfunctional immune responses in patients with COVID-19
Source: HighWire-hosted journal article supplement (doi:10.1136/gutjnl-2020-323020), 2021-01-11
Supplement: gutjnl-2020-323020supp001_data_supplement.xlsx [file gutjnl-2020-323020supp001_data_supplement.xlsx]

## Sheet: Table legends
Table legends
Table S1. PERMANOVA of patient parameters and gut microbiota composition
Table S2. LEfSe indicator microbial species of COVID-19 patients
Table S3. MaAsLin indicator microbial species of COVID-19 patients with and without antibiotics
Table S4. Ordinal regression of microbial species associated with COVID-19 disease severity
Table S5. Correlation tests of plasma cytokine concentrations and gut microbiota relative abundances
Table S6. LEfSe indicator microbial species of recovered COVID-19 patients

## Sheet: Table S1
COVID-19 patients and non-COVID-19 subjects
Terms	Df	SumsOfSqs	MeanSqs	F.Model	R2	p-value
cohort	1	18940	18940.1	4.0947	0.024	<0.001
antibiotics	1	18858	18857.9	4.0769	0.0239	<0.001
antivirals	1	6660	6660	1.4398	0.00844	0.0596
Residuals	161	744712	4625.5		0.94366
Total	164	789170			1
COVID-19 patients only
Terms	Df	SumsOfSqs	MeanSqs	F.Model	R2	p-value
Severity classification	3	24515	8171.8	1.71454	0.05895	<0.001
santibiotics	1	10739	10739.1	2.25318	0.02526	<0.001
antivirals	1	5471	5471.1	1.154	0.01286	0.1901
Residuals	81	384023	4741		0.90293
Total	86	425306			1

## Sheet: Table S2
Species	logarithm value of the highest mean among all the classes	Association cohort	LDA score	p-value	mean relative abundance COVID-19 (%)	mean relative abundance non-COVID-19 (%)
k__Bacteria; p__Firmicutes; c__Clostridia; o__Clostridiales; f__Lachnospiraceae; g__Blautia; s__Ruminococcus_gnavus	4.66718	COVID	4.10893	0.000551954	4.64434	1.82338
k__Bacteria; p__Bacteroidetes; c__Bacteroidia; o__Bacteroidales; f__Bacteroidaceae; g__Bacteroides; s__Bacteroides_dorei	4.4816	COVID	4.03134	0.0241217	3.02954	0.737729
k__Bacteria; p__Firmicutes; c__Clostridia; o__Clostridiales; f__Lachnospiraceae; g__Blautia; s__Ruminococcus_torques	4.64708	COVID	4.01882	0.00317	4.43528	2.2706
k__Bacteria; p__Bacteroidetes; c__Bacteroidia; o__Bacteroidales; f__Bacteroidaceae; g__Bacteroides; s__Bacteroides_vulgatus	4.45429	COVID	3.98358	0.00018111	2.84385	1.1353
k__Bacteria; p__Bacteroidetes; c__Bacteroidia; o__Bacteroidales; f__Bacteroidaceae; g__Bacteroides; s__Bacteroides_ovatus	4.28378	COVID	3.83815	0.0159443	1.9207	0.61563
k__Bacteria; p__Bacteroidetes; c__Bacteroidia; o__Bacteroidales; f__Bacteroidaceae; g__Bacteroides; s__Bacteroides_caccae	4.16376	COVID	3.74129	0.0177304	1.4578	0.413354
k__Bacteria; p__Firmicutes; c__Bacilli; o__Lactobacillales; f__Streptococcaceae; g__Streptococcus; s__Streptococcus_parasanguinis	3.92428	COVID	3.50752	0.0369412	0.838799	0.221031
k__Bacteria; p__Bacteroidetes; c__Bacteroidia; o__Bacteroidales; f__Porphyromonadaceae; g__Parabacteroides; s__Parabacteroides_unclassified	3.86104	COVID	3.47784	0.000364569	0.725606	0.108324
k__Bacteria; p__Bacteroidetes; c__Bacteroidia; o__Bacteroidales; f__Porphyromonadaceae; g__Parabacteroides; s__Parabacteroides_distasonis	3.86419	COVID	3.46309	0.00954771	0.7313	0.172927
k__Bacteria; p__Verrucomicrobia; c__Verrucomicrobiae; o__Verrucomicrobiales; f__Verrucomicrobiaceae; g__Akkermansia; s__Akkermansia_muciniphila	4.0256	COVID	3.38837	0.0212696	1.06062	0.772822
k__Bacteria; p__Firmicutes; c__Clostridia; o__Clostridiales; f__Clostridiaceae; g__Clostridium; s__Clostridium_bolteae	3.72983	COVID	3.36545	0.000690256	0.536723	0.077209
k__Bacteria; p__Firmicutes; c__Erysipelotrichia; o__Erysipelotrichales; f__Erysipelotrichaceae; g__Coprobacillus; s__Coprobacillus_unclassified	3.60352	COVID	3.29664	0.00167626	0.40129	0.0431405
k__Bacteria; p__Actinobacteria; c__Actinobacteria; o__Bifidobacteriales; f__Bifidobacteriaceae; g__Parascardovia; s__Parascardovia_denticolens	1.38403	COVID	3.08526	0.0153967	0.00241517	0.000141026
k__Bacteria; p__Proteobacteria; c__Betaproteobacteria; o__Burkholderiales; f__Sutterellaceae; g__Sutterella; s__Sutterella_wadsworthensis	3.38748	COVID	3.07043	0.000987741	0.244041	0.02902
k__Bacteria; p__Firmicutes; c__Clostridia; o__Clostridiales; f__Clostridiales_Family_XI_Incertae_Sedis; g__Finegoldia; s__Finegoldia_magna	1.32176	COVID	3.04689	0.0420734	0.00209736	0.000175641
k__Bacteria; p__Fusobacteria; c__Fusobacteriia; o__Fusobacteriales; f__Fusobacteriaceae; g__Fusobacterium; s__Fusobacterium_varium	3.33244	COVID	3.03804	0.00178332	0.214952	0.000921154
k__Bacteria; p__Firmicutes; c__Clostridia; o__Clostridiales; f__Ruminococcaceae; g__Ruminococcus; s__Ruminococcus_callidus	3.45081	COVID	2.95621	0.00256615	0.28199	0.125381
k__Bacteria; p__Firmicutes; c__Clostridia; o__Clostridiales; f__Clostridiaceae; g__Clostridium; s__Clostridium_clostridioforme	3.31545	COVID	2.93019	0.0317708	0.206724	0.0119365
k__Bacteria; p__Fusobacteria; c__Fusobacteriia; o__Fusobacteriales; f__Fusobacteriaceae; g__Fusobacterium; s__Fusobacterium_mortiferum	3.10736	COVID	2.83673	0.00811232	0.12803	0.000146282
k__Bacteria; p__Firmicutes; c__Clostridia; o__Clostridiales; f__Lachnospiraceae; g__Lachnospiraceae_noname; s__Lachnospiraceae_bacterium_2_1_46FAA	3.12231	COVID	2.80991	0.0436974	0.132514	0.00327731
k__Bacteria; p__Bacteroidetes; c__Bacteroidia; o__Bacteroidales; f__Porphyromonadaceae; g__Odoribacter; s__Odoribacter_splanchnicus	3.25662	COVID	2.78537	0.0126368	0.180473	0.0768913
k__Bacteria; p__Candidatus_Saccharibacteria; c__Candidatus_Saccharibacteria_noname; o__Candidatus_Saccharibacteria_noname; f__Candidatus_Saccharibacteria_noname; g__Candidatus_Saccharibacteria_noname; s__candidate_division_TM7_single_cell_isolate_TM7c	2.35881	COVID	2.78017	0.00196873	0.0227575	0.00230474
k__Bacteria; p__Firmicutes; c__Bacilli; o__Bacillales; f__Staphylococcaceae; g__Staphylococcus; s__Staphylococcus_epidermidis	2.93776	COVID	2.77904	0.0320946	0.0866191	0
k__Bacteria; p__Firmicutes; c__Clostridia; o__Clostridiales; f__Clostridiales_noname; g__Clostridiales_noname; s__Clostridiales_bacterium_1_7_47FAA	2.47576	COVID	2.60586	0.00978596	0.0299025	0.00754346
k__Bacteria; p__Firmicutes; c__Erysipelotrichia; o__Erysipelotrichales; f__Erysipelotrichaceae; g__Erysipelotrichaceae_noname; s__Clostridium_ramosum	2.78516	COVID	2.50123	0.00685645	0.0609666	0.00891744
k__Bacteria; p__Firmicutes; c__Bacilli; o__Lactobacillales; f__Streptococcaceae; g__Lactococcus; s__Lactococcus_lactis	2.77586	COVID	2.4841	0.0499135	0.0595585	0.0227429
k__Bacteria; p__Firmicutes; c__Clostridia; o__Clostridiales; f__Lachnospiraceae; g__Lachnospiraceae_noname; s__Lachnospiraceae_bacterium_1_4_56FAA	3.09651	COVID	2.44984	0.0128618	0.124827	0.107337
k__Bacteria; p__Firmicutes; c__Bacilli; o__Lactobacillales; f__Leuconostocaceae; g__Leuconostoc; s__Leuconostoc_citreum	2.44506	COVID	2.43021	0.0414779	0.0278045	0.00172962
k__Bacteria; p__Firmicutes; c__Bacilli; o__Lactobacillales; f__Streptococcaceae; g__Streptococcus; s__Streptococcus_mutans	2.46686	COVID	2.40169	0.0219633	0.0292706	0.00142526
k__Bacteria; p__Actinobacteria; c__Actinobacteria; o__Actinomycetales; f__Actinomycetaceae; g__Actinomyces; s__Actinomyces_graevenitzii	2.6753	COVID	2.39367	0.0114871	0.04729	0.00816667
k__Bacteria; p__Actinobacteria; c__Actinobacteria; o__Bifidobacteriales; f__Bifidobacteriaceae; g__Bifidobacterium; s__Bifidobacterium_animalis	2.78072	COVID	2.39304	0.0185229	0.0603452	0
k__Bacteria; p__Bacteroidetes; c__Bacteroidia; o__Bacteroidales; f__Rikenellaceae; g__Alistipes; s__Alistipes_finegoldii	2.7894	COVID	2.35337	0.0373903	0.0615553	0.0336365
k__Bacteria; p__Fusobacteria; c__Fusobacteriia; o__Fusobacteriales; f__Fusobacteriaceae; g__Fusobacterium; s__Fusobacterium_ulcerans	2.522	COVID	2.3286	0.00586238	0.0332621	0.00177718
k__Bacteria; p__Firmicutes; c__Bacilli; o__Bacillales; f__Staphylococcaceae; g__Staphylococcus; s__Staphylococcus_aureus	2.38305	COVID	2.2454	0.000226564	0.0241489	0
k__Bacteria; p__Firmicutes; c__Clostridia; o__Clostridiales; f__Clostridiaceae; g__Clostridium; s__Clostridium_asparagiforme	2.43878	COVID	2.22939	0.00935708	0.0274605	0.0136531
k__Bacteria; p__Actinobacteria; c__Actinobacteria; o__Bifidobacteriales; f__Bifidobacteriaceae; g__Bifidobacterium; s__Bifidobacterium_adolescentis	4.89097	non-COVID	4.3266	0.0201994	3.94378	7.77823
k__Bacteria; p__Firmicutes; c__Clostridia; o__Clostridiales; f__Eubacteriaceae; g__Eubacterium; s__Eubacterium_rectale	4.83168	non-COVID	4.25201	0.000108749	3.13634	6.78317
k__Bacteria; p__Firmicutes; c__Clostridia; o__Clostridiales; f__Ruminococcaceae; g__Ruminococcus; s__Ruminococcus_bromii	4.75801	non-COVID	4.25056	0.0133188	2.19319	5.72658
k__Bacteria; p__Firmicutes; c__Clostridia; o__Clostridiales; f__Ruminococcaceae; g__Subdoligranulum; s__Subdoligranulum_unclassified	4.6908	non-COVID	4.09686	5.79346e-05	2.38722	4.90492
k__Bacteria; p__Actinobacteria; c__Actinobacteria; o__Bifidobacteriales; f__Bifidobacteriaceae; g__Bifidobacterium; s__Bifidobacterium_pseudocatenulatum	4.58311	non-COVID	4.03874	0.00138364	1.94265	3.82796
k__Bacteria; p__Firmicutes; c__Clostridia; o__Clostridiales; f__Ruminococcaceae; g__Faecalibacterium; s__Faecalibacterium_prausnitzii	4.77067	non-COVID	4.02182	0.000461006	3.69383	5.89453
k__Bacteria; p__Actinobacteria; c__Actinobacteria; o__Coriobacteriales; f__Coriobacteriaceae; g__Collinsella; s__Collinsella_aerofaciens	4.65285	non-COVID	3.95594	0.0299713	2.57894	4.49499
k__Bacteria; p__Proteobacteria; c__Gammaproteobacteria; o__Enterobacteriales; f__Enterobacteriaceae; g__Klebsiella; s__Klebsiella_pneumoniae	3.95954	non-COVID	3.56778	0.000707449	0.106095	0.910774
k__Bacteria; p__Actinobacteria; c__Actinobacteria; o__Coriobacteriales; f__Coriobacteriaceae; g__Adlercreutzia; s__Adlercreutzia_equolifaciens	3.90947	non-COVID	3.54108	2.96096e-10	0.0833348	0.811514
k__Bacteria; p__Firmicutes; c__Clostridia; o__Clostridiales; f__Lachnospiraceae; g__Blautia; s__Ruminococcus_obeum	4.37975	non-COVID	3.53451	0.0174141	1.68971	2.39657
k__Bacteria; p__Actinobacteria; c__Actinobacteria; o__Coriobacteriales; f__Coriobacteriaceae; g__Collinsella; s__Collinsella_tanakaei	3.856	non-COVID	3.36582	0.0361309	0.368125	0.717676
k__Bacteria; p__Firmicutes; c__Negativicutes; o__Selenomonadales; f__Veillonellaceae; g__Megasphaera; s__Megasphaera_unclassified	3.73936	non-COVID	3.31933	0.00602632	0.188706	0.548377
k__Bacteria; p__Firmicutes; c__Clostridia; o__Clostridiales; f__Lachnospiraceae; g__Dorea; s__Dorea_longicatena	4.1769	non-COVID	3.31155	0.0285172	1.08956	1.50229
k__Bacteria; p__Bacteroidetes; c__Bacteroidia; o__Bacteroidales; f__Bacteroidaceae; g__Bacteroides; s__Bacteroides_eggerthii	3.66392	non-COVID	3.3064	0.00509304	0.0690732	0.461203
k__Bacteria; p__Firmicutes; c__Clostridia; o__Clostridiales; f__Clostridiaceae; g__Clostridium; s__Clostridium_leptum	3.6826	non-COVID	3.28548	9.81269e-07	0.0868953	0.481461
k__Bacteria; p__Firmicutes; c__Clostridia; o__Clostridiales; f__Lachnospiraceae; g__Coprococcus; s__Coprococcus_comes	4.13541	non-COVID	3.26081	0.0174049	0.986766	1.36521
k__Bacteria; p__Firmicutes; c__Clostridia; o__Clostridiales; f__Ruminococcaceae; g__Ruminococcus; s__Ruminococcus_lactaris	3.93413	non-COVID	3.21793	0.00231613	0.547814	0.858357
k__Bacteria; p__Firmicutes; c__Clostridia; o__Clostridiales; f__Clostridiales_Family_XIII_Incertae_Sedis; g__Clostridiales_Family_XIII_Incertae_Sedis_noname; s__Eubacterium_infirmum	1.25819	non-COVID	3.19955	0.00331546	4.43678e-05	0.00181115
k__Bacteria; p__Firmicutes; c__Clostridia; o__Clostridiales; f__Lachnospiraceae; g__Dorea; s__Dorea_formicigenerans	4.1855	non-COVID	3.06358	0.0485258	1.35449	1.53192
k__Bacteria; p__Firmicutes; c__Clostridia; o__Clostridiales; f__Ruminococcaceae; g__Subdoligranulum; s__Subdoligranulum_sp_4_3_54A2FAA	3.34098	non-COVID	2.94097	0.00110265	0.0369105	0.219152
k__Bacteria; p__Firmicutes; c__Clostridia; o__Clostridiales; f__Lachnospiraceae; g__Roseburia; s__Roseburia_intestinalis	3.62753	non-COVID	2.91795	0.000873308	0.281911	0.424068
k__Bacteria; p__Firmicutes; c__Clostridia; o__Clostridiales; f__Lachnospiraceae; g__Roseburia; s__Roseburia_hominis	3.48408	non-COVID	2.91552	9.53231e-06	0.147026	0.304712
k__Bacteria; p__Firmicutes; c__Clostridia; o__Clostridiales; f__Eubacteriaceae; g__Eubacterium; s__Eubacterium_ventriosum	3.53254	non-COVID	2.8828	0.000170493	0.191953	0.340528
k__Bacteria; p__Firmicutes; c__Bacilli; o__Lactobacillales; f__Leuconostocaceae; g__Leuconostoc; s__Leuconostoc_carnosum	1.57839	non-COVID	2.87482	0.0330378	0	0.0037859
k__Bacteria; p__Firmicutes; c__Clostridia; o__Clostridiales; f__Clostridiaceae; g__Clostridium; s__Clostridium_sp_L2_50	3.17969	non-COVID	2.83251	0.0388751	0.0298449	0.151242
k__Bacteria; p__Firmicutes; c__Clostridia; o__Clostridiales; f__Ruminococcaceae; g__Ruminococcus; s__Ruminococcus_champanellensis	1.78815	non-COVID	2.75611	0.0330378	0	0.00613923
k__Bacteria; p__Actinobacteria; c__Actinobacteria; o__Actinomycetales; f__Actinomycetaceae; g__Actinomyces; s__Actinomyces_cardiffensis	1.30949	non-COVID	2.72017	0.0313138	0.00129954	0.00203885
k__Bacteria; p__Firmicutes; c__Bacilli; o__Lactobacillales; f__Streptococcaceae; g__Streptococcus; s__Streptococcus_cristatus	1.64436	non-COVID	2.62676	0.020083	0.00207989	0.00440821
k__Bacteria; p__Firmicutes; c__Bacilli; o__Lactobacillales; f__Leuconostocaceae; g__Weissella; s__Weissella_cibaria	1.67952	non-COVID	2.59206	0.0299195	0.00169379	0.00478051
k__Bacteria; p__Firmicutes; c__Clostridia; o__Clostridiales; f__Peptostreptococcaceae; g__Peptostreptococcaceae_noname; s__Peptostreptococcaceae_noname_unclassified	2.9761	non-COVID	2.58778	1.20887e-05	0.0219876	0.0946313
k__Bacteria; p__Firmicutes; c__Bacilli; o__Lactobacillales; f__Streptococcaceae; g__Lactococcus; s__Lactococcus_garvieae	2.86965	non-COVID	2.55181	9.35727e-06	0.00987805	0.0740577
k__Bacteria; p__Proteobacteria; c__Gammaproteobacteria; o__Enterobacteriales; f__Enterobacteriaceae; g__Citrobacter; s__Citrobacter_unclassified	2.56194	non-COVID	2.5387	0.000419857	5.58621e-05	0.0364658
k__Bacteria; p__Actinobacteria; c__Actinobacteria; o__Coriobacteriales; f__Coriobacteriaceae; g__Slackia; s__Slackia_piriformis	2.98583	non-COVID	2.49953	0.0213813	0.0481882	0.0967638
k__Bacteria; p__Actinobacteria; c__Actinobacteria; o__Coriobacteriales; f__Coriobacteriaceae; g__Olsenella; s__Olsenella_unclassified	1.81164	non-COVID	2.48935	0.0036481	0.00532379	0.00647808
k__Bacteria; p__Firmicutes; c__Bacilli; o__Lactobacillales; f__Leuconostocaceae; g__Weissella; s__Weissella_confusa	1.8587	non-COVID	2.47005	0.00696089	0.00660483	0.00722064
k__Bacteria; p__Proteobacteria; c__Gammaproteobacteria; o__Enterobacteriales; f__Enterobacteriaceae; g__Citrobacter; s__Citrobacter_freundii	2.35139	non-COVID	2.4663	0.000154228	0	0.0224556
k__Bacteria; p__Firmicutes; c__Bacilli; o__Lactobacillales; f__Leuconostocaceae; g__Leuconostoc; s__Leuconostoc_lactis	1.73351	non-COVID	2.43204	0.0254229	0.00282989	0.00541231
k__Bacteria; p__Proteobacteria; c__Betaproteobacteria; o__Burkholderiales; f__Oxalobacteraceae; g__Oxalobacter; s__Oxalobacter_formigenes	2.5044	non-COVID	2.40267	0.00326774	0.00374184	0.0319405
k__Bacteria; p__Firmicutes; c__Bacilli; o__Lactobacillales; f__Streptococcaceae; g__Streptococcus; s__Streptococcus_australis	2.94974	non-COVID	2.34111	0.00235451	0.0494701	0.0890321
k__Bacteria; p__Firmicutes; c__Erysipelotrichia; o__Erysipelotrichales; f__Erysipelotrichaceae; g__Holdemania; s__Holdemania_filiformis	2.35051	non-COVID	2.17923	0.000248318	0.0127317	0.0224064
k__Bacteria; p__Firmicutes; c__Clostridia; o__Clostridiales; f__Lachnospiraceae; g__Lachnospiraceae_noname; s__Lachnospiraceae_bacterium_8_1_57FAA	2.67907	non-COVID	2.16115	0.00840848	0.0322045	0.0477273
k__Bacteria; p__Firmicutes; c__Negativicutes; o__Selenomonadales; f__Veillonellaceae; g__Megamonas; s__Megamonas_funiformis	2.93237	NA		-	0.0855584	0.0343465
k__Bacteria; p__Proteobacteria; c__Gammaproteobacteria; o__Enterobacteriales; f__Enterobacteriaceae; g__Escherichia; s__Escherichia_coli	4.37305	NA		-	1.29296	2.3591
k__Bacteria; p__Bacteroidetes; c__Bacteroidia; o__Bacteroidales; f__Bacteroidaceae; g__Bacteroides; s__Bacteroides_plebeius	3.37638	NA		-	0.237863	0.236537
k__Bacteria; p__Firmicutes; c__Clostridia; o__Clostridiales; f__Eubacteriaceae; g__Eubacterium; s__Eubacterium_brachy	1.25709	NA		-	0.00180414	0.000945256
k__Bacteria; p__Actinobacteria; c__Actinobacteria; o__Actinomycetales; f__Corynebacteriaceae; g__Corynebacterium; s__Corynebacterium_propinquum	0.482486	NA		-	0.000303678	0
k__Bacteria; p__Actinobacteria; c__Actinobacteria; o__Actinomycetales; f__Actinomycetaceae; g__Mobiluncus; s__Mobiluncus_unclassified	0.281519	NA		-	8.1954e-05	0.000191154
k__Bacteria; p__Firmicutes; c__Negativicutes; o__Selenomonadales; f__Acidaminococcaceae; g__Phascolarctobacterium; s__Phascolarctobacterium_succinatutens	3.53922	NA		-	0.139348	0.345296
k__Bacteria; p__Actinobacteria; c__Actinobacteria; o__Actinomycetales; f__Actinomycetaceae; g__Actinomyces; s__Actinomyces_sp_ph3	2.61161	NA		-	0.0407303	0
k__Bacteria; p__Firmicutes; c__Clostridia; o__Clostridiales; f__Lachnospiraceae; g__Lachnospiraceae_noname; s__Lachnospiraceae_bacterium_2_1_58FAA	3.35041	NA		-	0.223983	0.15165
k__Bacteria; p__Actinobacteria; c__Actinobacteria; o__Actinomycetales; f__Corynebacteriaceae; g__Corynebacterium; s__Corynebacterium_matruchotii	0.874823	NA		-	0.000746667	2e-05
k__Bacteria; p__Firmicutes; c__Erysipelotrichia; o__Erysipelotrichales; f__Erysipelotrichaceae; g__Solobacterium; s__Solobacterium_moorei	2.05213	NA		-	0.0112676	0.00345359
k__Bacteria; p__Proteobacteria; c__Betaproteobacteria; o__Neisseriales; f__Neisseriaceae; g__Neisseria; s__Neisseria_meningitidis	0	NA		-	8.96552e-06	0
k__Bacteria; p__Actinobacteria; c__Actinobacteria; o__Actinomycetales; f__Actinomycetaceae; g__Varibaculum; s__Varibaculum_cambriense	2.13376	NA		-	0.0136016	8.14103e-05
k__Bacteria; p__Firmicutes; c__Bacilli; o__Lactobacillales; f__Streptococcaceae; g__Streptococcus; s__Streptococcus_dysgalactiae	0.463663	NA		-	0.000290805	3.5641e-05
k__Bacteria; p__Actinobacteria; c__Actinobacteria; o__Bifidobacteriales; f__Bifidobacteriaceae; g__Bifidobacterium; s__Bifidobacterium_breve	2.49938	NA		-	0.0315667	0.00136397
k__Bacteria; p__Firmicutes; c__Bacilli; o__Bacillales; f__Bacillales_noname; g__Gemella; s__Gemella_sanguinis	2.17411	NA		-	0.0149202	0.0121441
k__Bacteria; p__Bacteroidetes; c__Bacteroidia; o__Bacteroidales; f__Porphyromonadaceae; g__Porphyromonas; s__Porphyromonas_uenonis	1.29283	NA		-	2.36782e-05	0.00196231
k__Bacteria; p__Firmicutes; c__Clostridia; o__Clostridiales; f__Clostridiaceae; g__Clostridium; s__Clostridium_nexile	3.67384	NA		-	0.471552	0.331405
k__Bacteria; p__Firmicutes; c__Clostridia; o__Clostridiales; f__Clostridiales_Family_XI_Incertae_Sedis; g__Peptoniphilus; s__Peptoniphilus_lacrimalis	1.47846	NA		-	0.00300862	0.000613974
k__Bacteria; p__Firmicutes; c__Clostridia; o__Clostridiales; f__Clostridiales_Family_XI_Incertae_Sedis; g__Parvimonas; s__Parvimonas_micra	2.39109	NA		-	0.0245882	0.00105038
k__Bacteria; p__Actinobacteria; c__Actinobacteria; o__Bifidobacteriales; f__Bifidobacteriaceae; g__Bifidobacterium; s__Bifidobacterium_longum	4.80152	NA		-	6.32852	5.82445
k__Bacteria; p__Firmicutes; c__Erysipelotrichia; o__Erysipelotrichales; f__Erysipelotrichaceae; g__Catenibacterium; s__Catenibacterium_mitsuokai	3.28431	NA		-	0.192417	0.142771
k__Bacteria; p__Firmicutes; c__Clostridia; o__Clostridiales; f__Clostridiales_Family_XI_Incertae_Sedis; g__Anaerococcus; s__Anaerococcus_lactolyticus	1.26563	NA		-	0	0.00184321
k__Bacteria; p__Firmicutes; c__Negativicutes; o__Selenomonadales; f__Acidaminococcaceae; g__Acidaminococcus; s__Acidaminococcus_unclassified	3.39274	NA		-	0.173377	0.246807
k__Bacteria; p__Actinobacteria; c__Actinobacteria; o__Coriobacteriales; f__Coriobacteriaceae; g__Atopobium; s__Atopobium_rimae	2.34759	NA		-	0.0222016	0.00101179
k__Bacteria; p__Firmicutes; c__Clostridia; o__Clostridiales; f__Clostridiaceae; g__Clostridium; s__Clostridium_citroniae	2.3943	NA		-	0.0247846	0.00732987
k__Bacteria; p__Bacteroidetes; c__Bacteroidia; o__Bacteroidales; f__Prevotellaceae; g__Prevotella; s__Prevotella_copri	4.29907	NA		-	0.987027	1.98597
k__Bacteria; p__Firmicutes; c__Negativicutes; o__Selenomonadales; f__Veillonellaceae; g__Mitsuokella; s__Mitsuokella_unclassified	2.88922	NA		-	0.0769279	0.0132624
k__Bacteria; p__Firmicutes; c__Bacilli; o__Lactobacillales; f__Lactobacillaceae; g__Pediococcus; s__Pediococcus_acidilactici	0.667461	NA		-	0	0.000465
k__Bacteria; p__Firmicutes; c__Clostridia; o__Clostridiales; f__Lachnospiraceae; g__Lachnospiraceae_noname; s__Lachnospiraceae_bacterium_3_1_57FAA_CT1	2.88843	NA		-	0.0773399	0.0281195
k__Bacteria; p__Firmicutes; c__Clostridia; o__Clostridiales; f__Clostridiaceae; g__Clostridium; s__Clostridium_hathewayi	3.60103	NA		-	0.399024	0.0922435
k__Bacteria; p__Firmicutes; c__Bacilli; o__Lactobacillales; f__Lactobacillaceae; g__Lactobacillus; s__Lactobacillus_gastricus	0.587249	NA		-	0.000386552	0
k__Bacteria; p__Actinobacteria; c__Actinobacteria; o__Coriobacteriales; f__Coriobacteriaceae; g__Olsenella; s__Olsenella_profusa	1.82006	NA		-	0.00659724	0.000186923
k__Bacteria; p__Firmicutes; c__Clostridia; o__Clostridiales; f__Lachnospiraceae; g__Anaerostipes; s__Anaerostipes_caccae	2.10021	NA		-	0.00614172	0.0125947
k__Bacteria; p__Actinobacteria; c__Actinobacteria; o__Actinomycetales; f__Actinomycetaceae; g__Actinomyces; s__Actinomyces_oris	1.77889	NA		-	0.00599828	0.00237141
k__Bacteria; p__Firmicutes; c__Negativicutes; o__Selenomonadales; f__Acidaminococcaceae; g__Acidaminococcus; s__Acidaminococcus_sp_D21	1.52007	NA		-	0	0.00331154
k__Bacteria; p__Proteobacteria; c__Betaproteobacteria; o__Neisseriales; f__Neisseriaceae; g__Neisseria; s__Neisseria_unclassified	1.25525	NA		-	0.00179287	0
k__Bacteria; p__Actinobacteria; c__Actinobacteria; o__Actinomycetales; f__Propionibacteriaceae; g__Propionibacterium; s__Propionibacterium_propionicum	2.08045	NA		-	0.0120062	0.00335667
k__Bacteria; p__Actinobacteria; c__Actinobacteria; o__Actinomycetales; f__Actinomycetaceae; g__Actinomyces; s__Actinomyces_georgiae	0	NA		-	5.34483e-05	5.12821e-05
k__Bacteria; p__Actinobacteria; c__Actinobacteria; o__Actinomycetales; f__Corynebacteriaceae; g__Corynebacterium; s__Corynebacterium_durum	1.51938	NA		-	0.00329862	0.00308077
k__Bacteria; p__Firmicutes; c__Clostridia; o__Clostridiales; f__Ruminococcaceae; g__Anaerotruncus; s__Anaerotruncus_colihominis	2.36426	NA		-	0.0199546	0.0231277
k__Bacteria; p__Bacteroidetes; c__Bacteroidia; o__Bacteroidales; f__Rikenellaceae; g__Alistipes; s__Alistipes_onderdonkii	3.63271	NA		-	0.429189	0.212368
k__Bacteria; p__Proteobacteria; c__Gammaproteobacteria; o__Enterobacteriales; f__Enterobacteriaceae; g__Shigella; s__Shigella_flexneri	0	NA		-	7.82759e-05	6.62821e-05
k__Bacteria; p__Actinobacteria; c__Actinobacteria; o__Coriobacteriales; f__Coriobacteriaceae; g__Collinsella; s__Collinsella_intestinalis	2.9936	NA		-	0.0298895	0.0985114
k__Bacteria; p__Firmicutes; c__Bacilli; o__Lactobacillales; f__Lactobacillaceae; g__Lactobacillus; s__Lactobacillus_sakei	1.11556	NA		-	0.000675517	0.00130474
k__Bacteria; p__Firmicutes; c__Bacilli; o__Lactobacillales; f__Enterococcaceae; g__Enterococcus; s__Enterococcus_raffinosus	2.65276	NA		-	0.0449532	0
k__Bacteria; p__Firmicutes; c__Negativicutes; o__Selenomonadales; f__Veillonellaceae; g__Selenomonas; s__Selenomonas_noxia	0.994905	NA		-	0.000984483	0
k__Bacteria; p__Firmicutes; c__Clostridia; o__Clostridiales; f__Clostridiaceae; g__Butyricicoccus; s__Butyricicoccus_pullicaecorum	0.342876	NA		-	0.00022023	0
k__Bacteria; p__Firmicutes; c__Bacilli; o__Lactobacillales; f__Lactobacillaceae; g__Lactobacillus; s__Lactobacillus_sanfranciscensis	1.47701	NA		-	0	0.0029991
k__Bacteria; p__Firmicutes; c__Bacilli; o__Lactobacillales; f__Lactobacillaceae; g__Lactobacillus; s__Lactobacillus_acidophilus	0.648707	NA		-	0.000445172	0
k__Bacteria; p__Firmicutes; c__Clostridia; o__Clostridiales; f__Clostridiaceae; g__Clostridium; s__Clostridium_hylemonae	1.31819	NA		-	0.00207793	0.000552692
k__Bacteria; p__Bacteroidetes; c__Bacteroidia; o__Bacteroidales; f__Prevotellaceae; g__Prevotella; s__Prevotella_melaninogenica	0	NA		-	9.22989e-05	0
k__Bacteria; p__Firmicutes; c__Clostridia; o__Clostridiales; f__Lachnospiraceae; g__Lachnospiraceae_noname; s__Lachnospiraceae_bacterium_9_1_43BFAA	1.85902	NA		-	0.00722115	0.00689936
k__Bacteria; p__Firmicutes; c__Clostridia; o__Clostridiales; f__Lachnospiraceae; g__Coprococcus; s__Coprococcus_catus	3.54465	NA		-	0.350316	0.337315
k__Bacteria; p__Bacteroidetes; c__Bacteroidia; o__Bacteroidales; f__Bacteroidaceae; g__Bacteroides; s__Bacteroides_fluxus	1.5448	NA		-	0.00350529	6.41026e-06
k__Bacteria; p__Actinobacteria; c__Actinobacteria; o__Actinomycetales; f__Actinomycetaceae; g__Actinomyces; s__Actinomyces_johnsonii	1.66454	NA		-	0.00284092	0.00461846
k__Bacteria; p__Proteobacteria; c__Deltaproteobacteria; o__Desulfovibrionales; f__Desulfovibrionaceae; g__Desulfovibrio; s__Desulfovibrio_desulfuricans	2.25632	NA		-	0.00962713	0.0180386
k__Bacteria; p__Firmicutes; c__Bacilli; o__Lactobacillales; f__Enterococcaceae; g__Enterococcus; s__Enterococcus_faecalis	3.31275	NA		-	0.0249477	0.205377
k__Bacteria; p__Proteobacteria; c__Alphaproteobacteria; o__Rhodobacterales; f__Rhodobacteraceae; g__Paracoccus; s__Paracoccus_unclassified	0.250062	NA		-	0	0.000177821
k__Bacteria; p__Proteobacteria; c__Gammaproteobacteria; o__Enterobacteriales; f__Enterobacteriaceae; g__Enterobacter; s__Enterobacter_sp_MGH_8	2.55232	NA		-	0	0.0356638
k__Bacteria; p__Firmicutes; c__Bacilli; o__Lactobacillales; f__Lactobacillaceae; g__Pediococcus; s__Pediococcus_unclassified	1.08646	NA		-	0	0.00122026
k__Archaea; p__Euryarchaeota; c__Methanobacteria; o__Methanobacteriales; f__Methanobacteriaceae; g__Methanosphaera; s__Methanosphaera_stadtmanae	2.46799	NA		-	0.02937	0.0281327
k__Bacteria; p__Bacteroidetes; c__Bacteroidia; o__Bacteroidales; f__Bacteroidaceae; g__Bacteroides; s__Bacteroides_finegoldii	3.45517	NA		-	0.285184	0.0583165
k__Bacteria; p__Fusobacteria; c__Fusobacteriia; o__Fusobacteriales; f__Fusobacteriaceae; g__Fusobacterium; s__Fusobacterium_gonidiaformans	2.43037	NA		-	0.0269362	0
k__Bacteria; p__Firmicutes; c__Bacilli; o__Lactobacillales; f__Streptococcaceae; g__Streptococcus; s__Streptococcus_gordonii	2.44368	NA		-	0.0277239	0.00491026
k__Bacteria; p__Firmicutes; c__Clostridia; o__Clostridiales; f__Clostridiaceae; g__Clostridium; s__Clostridium_scindens	1.11557	NA		-	0.00121034	0.00130474
k__Bacteria; p__Firmicutes; c__Negativicutes; o__Selenomonadales; f__Veillonellaceae; g__Megasphaera; s__Megasphaera_micronuciformis	1.55669	NA		-	0.00359322	0.00201782
k__Bacteria; p__Firmicutes; c__Negativicutes; o__Selenomonadales; f__Veillonellaceae; g__Veillonella; s__Veillonella_parvula	3.6111	NA		-	0.407537	0.0128492
k__Bacteria; p__Firmicutes; c__Bacilli; o__Lactobacillales; f__Lactobacillaceae; g__Pediococcus; s__Pediococcus_lolii	0.814375	NA		-	0	0.000652179
k__Bacteria; p__Bacteroidetes; c__Bacteroidia; o__Bacteroidales; f__Prevotellaceae; g__Prevotella; s__Prevotella_salivae	0.0612117	NA		-	0.000107011	0.000115128
k__Bacteria; p__Firmicutes; c__Bacilli; o__Lactobacillales; f__Lactobacillaceae; g__Lactobacillus; s__Lactobacillus_casei_paracasei	2.57802	NA		-	0.0378386	0.020375
k__Bacteria; p__Firmicutes; c__Clostridia; o__Clostridiales; f__Lachnospiraceae; g__Blautia; s__Blautia_hydrogenotrophica	2.93639	NA		-	0.0862703	0.0575423
k__Bacteria; p__Firmicutes; c__Bacilli; o__Lactobacillales; f__Enterococcaceae; g__Tetragenococcus; s__Tetragenococcus_halophilus	0	NA		-	0	4.65385e-05
k__Bacteria; p__Firmicutes; c__Clostridia; o__Clostridiales; f__Lachnospiraceae; g__Lachnospiraceae_noname; s__Lachnospiraceae_bacterium_6_1_63FAA	2.51621	NA		-	0.0328031	0.00138141
k__Bacteria; p__Firmicutes; c__Clostridia; o__Clostridiales; f__Ruminococcaceae; g__Ruminococcus; s__Ruminococcus_albus	0	NA		-	5.51724e-06	1.21795e-05
k__Bacteria; p__Firmicutes; c__Negativicutes; o__Selenomonadales; f__Veillonellaceae; g__Veillonella; s__Veillonella_unclassified	3.18613	NA		-	0.153172	0.022995
k__Bacteria; p__Firmicutes; c__Clostridia; o__Clostridiales; f__Clostridiales_Family_XI_Incertae_Sedis; g__Anaerococcus; s__Anaerococcus_obesiensis	1.76256	NA		-	0.00578621	7.82051e-06
k__Bacteria; p__Actinobacteria; c__Actinobacteria; o__Coriobacteriales; f__Coriobacteriaceae; g__Atopobium; s__Atopobium_parvulum	2.9866	NA		-	0.0966108	0.0030159
k__Bacteria; p__Firmicutes; c__Erysipelotrichia; o__Erysipelotrichales; f__Erysipelotrichaceae; g__Holdemania; s__Holdemania_unclassified	1.8767	NA		-	0.00752517	0.00673449
k__Bacteria; p__Actinobacteria; c__Actinobacteria; o__Actinomycetales; f__Dermabacteraceae; g__Brachybacterium; s__Brachybacterium_unclassified	0	NA		-	0	2.05128e-06
k__Bacteria; p__Firmicutes; c__Bacilli; o__Lactobacillales; f__Lactobacillaceae; g__Lactobacillus; s__Lactobacillus_crispatus	0.458153	NA		-	0.000103218	0.000287179
k__Bacteria; p__Proteobacteria; c__Betaproteobacteria; o__Burkholderiales; f__Burkholderiaceae; g__Ralstonia; s__Ralstonia_unclassified	0	NA		-	7.7931e-05	0
k__Bacteria; p__Firmicutes; c__Clostridia; o__Clostridiales; f__Eubacteriaceae; g__Eubacterium; s__Eubacterium_ramulus	3.54884	NA		-	0.353715	0.242591
k__Bacteria; p__Firmicutes; c__Clostridia; o__Clostridiales; f__Eubacteriaceae; g__Eubacterium; s__Eubacterium_siraeum	3.39874	NA		-	0.250426	0.189165
k__Bacteria; p__Firmicutes; c__Clostridia; o__Clostridiales; f__Ruminococcaceae; g__Ruminococcaceae_noname; s__Ruminococcaceae_bacterium_D16	2.74918	NA		-	0.0391617	0.0561258
k__Bacteria; p__Bacteroidetes; c__Bacteroidia; o__Bacteroidales; f__Prevotellaceae; g__Paraprevotella; s__Paraprevotella_clara	2.77481	NA		-	0.0595357	0.0469632
k__Bacteria; p__Actinobacteria; c__Actinobacteria; o__Actinomycetales; f__Micrococcaceae; g__Rothia; s__Rothia_unclassified	0.665455	NA		-	0.000105402	0.000462821
k__Bacteria; p__Proteobacteria; c__Gammaproteobacteria; o__Enterobacteriales; f__Enterobacteriaceae; g__Escherichia; s__Escherichia_albertii	0.91395	NA		-	0.000123448	0.000820256
k__Bacteria; p__Firmicutes; c__Bacilli; o__Lactobacillales; f__Leuconostocaceae; g__Leuconostoc; s__Leuconostoc_gasicomitatum	0.299233	NA		-	0.000198736	0.000130769
k__Bacteria; p__Firmicutes; c__Erysipelotrichia; o__Erysipelotrichales; f__Erysipelotrichaceae; g__Bulleidia; s__Bulleidia_extructa	0.629833	NA		-	0.000426322	0.000125256
k__Bacteria; p__Firmicutes; c__Clostridia; o__Clostridiales; f__Lachnospiraceae; g__Anaerostipes; s__Anaerostipes_hadrus	3.16297	NA		-	0.145387	0.0568254
k__Bacteria; p__Firmicutes; c__Clostridia; o__Clostridiales; f__Peptostreptococcaceae; g__Peptostreptococcaceae_noname; s__Clostridium_difficile	1.96428	NA		-	0.00218195	0.00921051
k__Bacteria; p__Firmicutes; c__Negativicutes; o__Selenomonadales; f__Veillonellaceae; g__Dialister; s__Dialister_succinatiphilus	3.09006	NA		-	0.00965747	0.123034
k__Bacteria; p__Bacteroidetes; c__Bacteroidia; o__Bacteroidales; f__Bacteroidaceae; g__Bacteroides; s__Bacteroides_fragilis	3.96661	NA		-	0.925281	0.340451
k__Bacteria; p__Firmicutes; c__Bacilli; o__Lactobacillales; f__Enterococcaceae; g__Enterococcus; s__Enterococcus_casseliflavus	0.160644	NA		-	0	0.000144744
k__Bacteria; p__Firmicutes; c__Bacilli; o__Lactobacillales; f__Streptococcaceae; g__Streptococcus; s__Streptococcus_peroris	0.989923	NA		-	0.000975862	0.000158462
k__Bacteria; p__Firmicutes; c__Clostridia; o__Clostridiales; f__Lachnospiraceae; g__Lachnospiraceae_noname; s__Lachnospiraceae_bacterium_5_1_63FAA	3.45096	NA		-	0.282364	0.277694
k__Bacteria; p__Firmicutes; c__Clostridia; o__Clostridiales; f__Peptostreptococcaceae; g__Peptostreptococcus; s__Peptostreptococcus_unclassified	2.51234	NA		-	0.0324102	0.000979872
k__Bacteria; p__Firmicutes; c__Negativicutes; o__Selenomonadales; f__Veillonellaceae; g__Megamonas; s__Megamonas_hypermegale	3.44138	NA		-	0.0731177	0.276286
k__Bacteria; p__Synergistetes; c__Synergistia; o__Synergistales; f__Synergistaceae; g__Pyramidobacter; s__Pyramidobacter_piscolens	0.425303	NA		-	0	0.000266154
k__Bacteria; p__Proteobacteria; c__Gammaproteobacteria; o__Pasteurellales; f__Pasteurellaceae; g__Haemophilus; s__Haemophilus_parainfluenzae	2.76807	NA		-	0.0520259	0.0585963
k__Bacteria; p__Firmicutes; c__Erysipelotrichia; o__Erysipelotrichales; f__Erysipelotrichaceae; g__Erysipelotrichaceae_noname; s__Eubacterium_cylindroides	2.72689	NA		-	0.0465233	0.0533051
k__Bacteria; p__Actinobacteria; c__Actinobacteria; o__Bifidobacteriales; f__Bifidobacteriaceae; g__Scardovia; s__Scardovia_inopinata	0.97224	NA		-	0.000935172	0
k__Bacteria; p__Firmicutes; c__Erysipelotrichia; o__Erysipelotrichales; f__Erysipelotrichaceae; g__Erysipelotrichaceae_noname; s__Erysipelotrichaceae_bacterium_2_2_44A	1.88713	NA		-	0.00728529	0.00770962
k__Bacteria; p__Firmicutes; c__Erysipelotrichia; o__Erysipelotrichales; f__Erysipelotrichaceae; g__Erysipelotrichaceae_noname; s__Erysipelotrichaceae_bacterium_6_1_45	2.44541	NA		-	0.022626	0.0278826
k__Bacteria; p__Firmicutes; c__Bacilli; o__Lactobacillales; f__Lactobacillaceae; g__Lactobacillus; s__Lactobacillus_gasseri	1.47116	NA		-	0.00295782	0.0014
k__Bacteria; p__Firmicutes; c__Clostridia; o__Clostridiales; f__Clostridiaceae; g__Clostridium; s__Clostridium_celatum	1.33859	NA		-	0	0.00217808
k__Bacteria; p__Bacteroidetes; c__Bacteroidia; o__Bacteroidales; f__Bacteroidaceae; g__Bacteroides; s__Bacteroides_faecis	2.63337	NA		-	0.0429889	0.00517564
k__Bacteria; p__Proteobacteria; c__Gammaproteobacteria; o__Enterobacteriales; f__Enterobacteriaceae; g__Escherichia; s__Escherichia_unclassified	3.942	NA		-	0.564633	0.874287
k__Bacteria; p__Actinobacteria; c__Actinobacteria; o__Actinomycetales; f__Micrococcaceae; g__Rothia; s__Rothia_mucilaginosa	2.6308	NA		-	0.0426491	0.0364078
k__Bacteria; p__Firmicutes; c__Bacilli; o__Bacillales; f__Bacillaceae; g__Geobacillus; s__Geobacillus_unclassified	0	NA		-	9.73563e-05	0
k__Bacteria; p__Firmicutes; c__Clostridia; o__Clostridiales; f__Ruminococcaceae; g__Ruminococcus; s__Ruminococcus_sp_5_1_39BFAA	4.70115	NA		-	5.02324	3.90298
k__Bacteria; p__Firmicutes; c__Bacilli; o__Lactobacillales; f__Lactobacillaceae; g__Lactobacillus; s__Lactobacillus_vaginalis	2.16722	NA		-	0.0146417	0
k__Bacteria; p__Bacteroidetes; c__Bacteroidia; o__Bacteroidales; f__Bacteroidaceae; g__Bacteroides; s__Bacteroides_xylanisolvens	3.51468	NA		-	0.326811	0.0753594
k__Bacteria; p__Firmicutes; c__Clostridia; o__Clostridiales; f__Clostridiaceae; g__Clostridium; s__Clostridium_symbiosum	2.94974	NA		-	0.0890617	0.0227367
k__Bacteria; p__Bacteroidetes; c__Bacteroidia; o__Bacteroidales; f__Bacteroidaceae; g__Bacteroides; s__Bacteroides_nordii	1.98099	NA		-	0.00957092	0.00397179
k__Bacteria; p__Firmicutes; c__Clostridia; o__Clostridiales; f__Clostridiaceae; g__Clostridium; s__Clostridium_perfringens	1.18361	NA		-	0.00152586	0.00144397
k__Bacteria; p__Firmicutes; c__Bacilli; o__Lactobacillales; f__Lactobacillaceae; g__Lactobacillus; s__Lactobacillus_coryniformis	1.23273	NA		-	0.00170517	0
k__Bacteria; p__Bacteroidetes; c__Bacteroidia; o__Bacteroidales; f__Bacteroidaceae; g__Bacteroides; s__Bacteroides_thetaiotaomicron	4.03268	NA		-	1.07753	0.432059
k__Bacteria; p__Bacteroidetes; c__Bacteroidia; o__Bacteroidales; f__Rikenellaceae; g__Alistipes; s__Alistipes_shahii	3.30274	NA		-	0.200708	0.178098
k__Bacteria; p__Proteobacteria; c__Alphaproteobacteria; o__Rhodobacterales; f__Rhodobacteraceae; g__Paracoccus; s__Paracoccus_denitrificans	0	NA		-	0	1.83333e-05
k__Bacteria; p__Firmicutes; c__Clostridia; o__Clostridiales; f__Oscillospiraceae; g__Oscillibacter; s__Oscillibacter_unclassified	3.53745	NA		-	0.298712	0.344431
k__Bacteria; p__Firmicutes; c__Bacilli; o__Lactobacillales; f__Lactobacillaceae; g__Lactobacillus; s__Lactobacillus_ruminis	0	NA		-	7.90805e-05	0
k__Bacteria; p__Firmicutes; c__Clostridia; o__Clostridiales; f__Ruminococcaceae; g__Anaerotruncus; s__Anaerotruncus_unclassified	1.72301	NA		-	0.00347276	0.0052741
k__Bacteria; p__Actinobacteria; c__Actinobacteria; o__Actinomycetales; f__Corynebacteriaceae; g__Corynebacterium; s__Corynebacterium_pseudogenitalium	0	NA		-	1.56322e-05	0
k__Bacteria; p__Firmicutes; c__Bacilli; o__Lactobacillales; f__Aerococcaceae; g__Abiotrophia; s__Abiotrophia_defectiva	2.79059	NA		-	0.061618	0.00266936
k__Bacteria; p__Actinobacteria; c__Actinobacteria; o__Actinomycetales; f__Actinomycetaceae; g__Actinomyces; s__Actinomyces_sp_ICM39	1.76901	NA		-	0.00587356	0
k__Bacteria; p__Firmicutes; c__Clostridia; o__Clostridiales; f__Eubacteriaceae; g__Anaerofustis; s__Anaerofustis_stercorihominis	1.56292	NA		-	0.00365391	0.00197256
k__Bacteria; p__Actinobacteria; c__Actinobacteria; o__Actinomycetales; f__Nocardiaceae; g__Rhodococcus; s__Rhodococcus_erythropolis	0	NA		-	4.2069e-05	0
k__Bacteria; p__Bacteroidetes; c__Bacteroidia; o__Bacteroidales; f__Prevotellaceae; g__Prevotella; s__Prevotella_disiens	0.402526	NA		-	0.000208391	0.000251154
k__Bacteria; p__Firmicutes; c__Clostridia; o__Clostridiales; f__Clostridiaceae; g__Clostridium; s__Clostridium_butyricum	0	NA		-	2.33333e-05	0
k__Bacteria; p__Bacteroidetes; c__Bacteroidia; o__Bacteroidales; f__Prevotellaceae; g__Prevotella; s__Prevotella_stercorea	3.2577	NA		-	0.0792641	0.181002
k__Bacteria; p__Bacteroidetes; c__Bacteroidia; o__Bacteroidales; f__Bacteroidaceae; g__Bacteroides; s__Bacteroides_stercoris	4.23739	NA		-	1.7261	1.03853
k__Bacteria; p__Firmicutes; c__Bacilli; o__Lactobacillales; f__Streptococcaceae; g__Streptococcus; s__Streptococcus_oligofermentans	1.04243	NA		-	0.000851149	0.00110256
k__Bacteria; p__Proteobacteria; c__Betaproteobacteria; o__Neisseriales; f__Neisseriaceae; g__Neisseria; s__Neisseria_sicca	0.22054	NA		-	0.000165517	0
k__Bacteria; p__Firmicutes; c__Bacilli; o__Lactobacillales; f__Enterococcaceae; g__Enterococcus; s__Enterococcus_mundtii	0.587797	NA		-	0	0.000387051
k__Bacteria; p__Synergistetes; c__Synergistia; o__Synergistales; f__Synergistaceae; g__Synergistes; s__Synergistes_sp_3_1_syn1	2.29881	NA		-	0.0198948	0
k__Bacteria; p__Bacteroidetes; c__Bacteroidia; o__Bacteroidales; f__Bacteroidaceae; g__Bacteroides; s__Bacteroides_coprocola	3.64831	NA		-	0.444908	0.323866
k__Bacteria; p__Firmicutes; c__Erysipelotrichia; o__Erysipelotrichales; f__Erysipelotrichaceae; g__Erysipelotrichaceae_noname; s__Eubacterium_biforme	4.05303	NA		-	1.12967	0.38793
k__Bacteria; p__Candidatus_Saccharibacteria; c__Candidatus_Saccharibacteria_noname; o__Candidatus_Saccharibacteria_noname; f__Candidatus_Saccharibacteria_noname; g__Candidatus_Saccharibacteria_noname; s__candidate_division_TM7_single_cell_isolate_TM7b	2.1354	NA		-	0.0136053	0.000800641
k__Bacteria; p__Bacteroidetes; c__Bacteroidia; o__Bacteroidales; f__Prevotellaceae; g__Paraprevotella; s__Paraprevotella_xylaniphila	1.77803	NA		-	0.00599782	0.00383487
k__Bacteria; p__Bacteroidetes; c__Bacteroidia; o__Bacteroidales; f__Prevotellaceae; g__Prevotella; s__Prevotella_histicola	0	NA		-	6.22989e-05	0
k__Bacteria; p__Firmicutes; c__Clostridia; o__Clostridiales; f__Clostridiales_noname; g__Flavonifractor; s__Flavonifractor_plautii	2.48329	NA		-	0.0304064	0.0224441
k__Bacteria; p__Bacteroidetes; c__Bacteroidia; o__Bacteroidales; f__Porphyromonadaceae; g__Parabacteroides; s__Parabacteroides_merdae	4.01771	NA		-	1.0415	0.266652
k__Bacteria; p__Firmicutes; c__Negativicutes; o__Selenomonadales; f__Veillonellaceae; g__Megamonas; s__Megamonas_unclassified	4.0237	NA		-	0.753349	1.05588
k__Bacteria; p__Actinobacteria; c__Actinobacteria; o__Actinomycetales; f__Actinomycetaceae; g__Actinomyces; s__Actinomyces_naeslundii	1.71443	NA		-	0.00517414	0.00434859
k__Bacteria; p__Firmicutes; c__Clostridia; o__Clostridiales; f__Lachnospiraceae; g__Blautia; s__Blautia_producta	2.56891	NA		-	0.0370441	0.0182645
k__Bacteria; p__Actinobacteria; c__Actinobacteria; o__Bifidobacteriales; f__Bifidobacteriaceae; g__Bifidobacterium; s__Bifidobacterium_pseudolongum	0	NA		-	0	1.96154e-05
k__Bacteria; p__Firmicutes; c__Clostridia; o__Clostridiales; f__Clostridiales_Family_XI_Incertae_Sedis; g__Peptoniphilus; s__Peptoniphilus_duerdenii	0	NA		-	6.12644e-05	0
k__Bacteria; p__Firmicutes; c__Bacilli; o__Lactobacillales; f__Streptococcaceae; g__Streptococcus; s__Streptococcus_macedonicus	0.56428	NA		-	0.000241379	0.00036641
k__Bacteria; p__Firmicutes; c__Bacilli; o__Lactobacillales; f__Enterococcaceae; g__Enterococcus; s__Enterococcus_avium	3.36494	NA		-	0.0735003	0.231709
k__Bacteria; p__Firmicutes; c__Bacilli; o__Lactobacillales; f__Carnobacteriaceae; g__Granulicatella; s__Granulicatella_unclassified	2.63266	NA		-	0.0428357	0.0110376
k__Bacteria; p__Actinobacteria; c__Actinobacteria; o__Bifidobacteriales; f__Bifidobacteriaceae; g__Scardovia; s__Scardovia_unclassified	0.834072	NA		-	0.000672644	0.000682179
k__Bacteria; p__Firmicutes; c__Bacilli; o__Lactobacillales; f__Lactobacillaceae; g__Lactobacillus; s__Lactobacillus_animalis	0.342959	NA		-	0	0.000220256
k__Bacteria; p__Firmicutes; c__Bacilli; o__Lactobacillales; f__Lactobacillaceae; g__Lactobacillus; s__Lactobacillus_plantarum	2.02017	NA		-	0.0104674	0.00095859
k__Bacteria; p__Firmicutes; c__Bacilli; o__Lactobacillales; f__Lactobacillaceae; g__Lactobacillus; s__Lactobacillus_oris	0	NA		-	0	9.65385e-05
k__Bacteria; p__Firmicutes; c__Erysipelotrichia; o__Erysipelotrichales; f__Erysipelotrichaceae; g__Erysipelotrichaceae_noname; s__Erysipelotrichaceae_bacterium_5_2_54FAA	1.60173	NA		-	0.00399644	0.000258462
k__Bacteria; p__Firmicutes; c__Bacilli; o__Bacillales; f__Bacillaceae; g__Bacillus; s__Bacillus_amyloliquefaciens	0.111565	NA		-	0	0.000129231
k__Bacteria; p__Actinobacteria; c__Actinobacteria; o__Actinomycetales; f__Micrococcaceae; g__Rothia; s__Rothia_aeria	2.53537	NA		-	0.0342915	0.00015
k__Bacteria; p__Firmicutes; c__Bacilli; o__Lactobacillales; f__Streptococcaceae; g__Streptococcus; s__Streptococcus_anginosus	2.86675	NA		-	0.0735463	0.0269388
k__Bacteria; p__Actinobacteria; c__Actinobacteria; o__Coriobacteriales; f__Coriobacteriaceae; g__Collinsella; s__Collinsella_unclassified	2.54585	NA		-	0.0351364	0.000662949
k__Bacteria; p__Firmicutes; c__Bacilli; o__Lactobacillales; f__Streptococcaceae; g__Streptococcus; s__Streptococcus_lutetiensis	1.00264	NA		-	0.000415977	0.00100603
k__Bacteria; p__Proteobacteria; c__Deltaproteobacteria; o__Desulfovibrionales; f__Desulfovibrionaceae; g__Bilophila; s__Bilophila_wadsworthia	2.54809	NA		-	0.0353163	0.0174231
k__Bacteria; p__Firmicutes; c__Clostridia; o__Clostridiales; f__Lachnospiraceae; g__Roseburia; s__Roseburia_unclassified	2.80712	NA		-	0.0641336	0.0231094
k__Bacteria; p__Bacteroidetes; c__Bacteroidia; o__Bacteroidales; f__Porphyromonadaceae; g__Porphyromonas; s__Porphyromonas_bennonis	0.665366	NA		-	0.00043023	0.000462692
k__Bacteria; p__Firmicutes; c__Clostridia; o__Clostridiales; f__Eubacteriaceae; g__Eubacterium; s__Eubacterium_sp_3_1_31	2.47071	NA		-	0.0295556	0.00707051
k__Bacteria; p__Firmicutes; c__Erysipelotrichia; o__Erysipelotrichales; f__Erysipelotrichaceae; g__Erysipelotrichaceae_noname; s__Clostridium_innocuum	2.82832	NA		-	0.0673382	0.00712821
k__Bacteria; p__Firmicutes; c__Clostridia; o__Clostridiales; f__Clostridiales_Family_XI_Incertae_Sedis; g__Clostridiales_Family_XI_Incertae_Sedis_noname; s__Clostridiales_bacterium_BV3C26	0.433799	NA		-	0.000271494	8.21795e-05
k__Bacteria; p__Firmicutes; c__Bacilli; o__Lactobacillales; f__Leuconostocaceae; g__Leuconostoc; s__Leuconostoc_mesenteroides	1.53227	NA		-	0.000174483	0.00340603
k__Bacteria; p__Proteobacteria; c__Gammaproteobacteria; o__Enterobacteriales; f__Enterobacteriaceae; g__Rahnella; s__Rahnella_unclassified	0.250386	NA		-	0.000177931	0
k__Bacteria; p__Firmicutes; c__Clostridia; o__Clostridiales; f__Peptostreptococcaceae; g__Peptostreptococcaceae_noname; s__Clostridium_bartlettii	3.04094	NA		-	0.109863	0.0913164
k__Bacteria; p__Proteobacteria; c__Gammaproteobacteria; o__Enterobacteriales; f__Enterobacteriaceae; g__Klebsiella; s__Klebsiella_unclassified	1.74701	NA		-	0.00128828	0.00558103
k__Bacteria; p__Actinobacteria; c__Actinobacteria; o__Actinomycetales; f__Corynebacteriaceae; g__Corynebacterium; s__Corynebacterium_accolens	0.782223	NA		-	0.000603448	4.87179e-05
k__Archaea; p__Euryarchaeota; c__Methanobacteria; o__Methanobacteriales; f__Methanobacteriaceae; g__Methanobrevibacter; s__Methanobrevibacter_unclassified	2.41643	NA		-	0.00669977	0.0260838
k__Bacteria; p__Firmicutes; c__Bacilli; o__Lactobacillales; f__Carnobacteriaceae; g__Granulicatella; s__Granulicatella_elegans	1.99393	NA		-	0.0098523	8.0641e-05
k__Bacteria; p__Firmicutes; c__Clostridia; o__Clostridiales; f__Lachnospiraceae; g__Roseburia; s__Roseburia_inulinivorans	3.97402	NA		-	0.94139	0.881948
k__Bacteria; p__Firmicutes; c__Clostridia; o__Clostridiales; f__Eubacteriaceae; g__Eubacterium; s__Eubacterium_eligens	3.86175	NA		-	0.726746	0.366279
k__Bacteria; p__Proteobacteria; c__Gammaproteobacteria; o__Enterobacteriales; f__Enterobacteriaceae; g__Proteus; s__Proteus_mirabilis	0.874592	NA		-	0	0.000748846
k__Bacteria; p__Firmicutes; c__Negativicutes; o__Selenomonadales; f__Veillonellaceae; g__Megamonas; s__Megamonas_rupellensis	3.24384	NA		-	0.175277	0.0823229
k__Bacteria; p__Actinobacteria; c__Actinobacteria; o__Coriobacteriales; f__Coriobacteriaceae; g__Slackia; s__Slackia_unclassified	1.76859	NA		-	0.00584897	0.00110372
k__Bacteria; p__Actinobacteria; c__Actinobacteria; o__Actinomycetales; f__Actinomycetaceae; g__Actinomyces; s__Actinomyces_viscosus	1.95966	NA		-	0.00910241	0.00424756
k__Bacteria; p__Firmicutes; c__Clostridia; o__Clostridiales; f__Clostridiaceae; g__Clostridium; s__Clostridium_sp_D5	1.34457	NA		-	0	0.0022109
k__Bacteria; p__Actinobacteria; c__Actinobacteria; o__Coriobacteriales; f__Coriobacteriaceae; g__Olsenella; s__Olsenella_uli	3.58047	NA		-	0.380241	0.00120077
k__Bacteria; p__Fusobacteria; c__Fusobacteriia; o__Fusobacteriales; f__Fusobacteriaceae; g__Fusobacterium; s__Fusobacterium_nucleatum	0.994655	NA		-	0.000987701	0.00034
k__Bacteria; p__Bacteroidetes; c__Bacteroidia; o__Bacteroidales; f__Bacteroidaceae; g__Bacteroides; s__Bacteroides_uniformis	4.1669	NA		-	1.46636	1.17008
k__Bacteria; p__Firmicutes; c__Bacilli; o__Bacillales; f__Bacillales_noname; g__Gemella; s__Gemella_unclassified	0.955578	NA		-	0.000635747	0.000902308
k__Bacteria; p__Firmicutes; c__Bacilli; o__Bacillales; f__Staphylococcaceae; g__Staphylococcus; s__Staphylococcus_warneri	1.22527	NA		-	0.00167655	3.71795e-06
k__Bacteria; p__Firmicutes; c__Clostridia; o__Clostridiales; f__Eubacteriaceae; g__Eubacterium; s__Eubacterium_limosum	2.90675	NA		-	0.0806605	0.0372788
k__Bacteria; p__Proteobacteria; c__Gammaproteobacteria; o__Enterobacteriales; f__Enterobacteriaceae; g__Enterobacter; s__Enterobacter_cloacae	4.07213	NA		-	1.18046	0.0321286
k__Bacteria; p__Firmicutes; c__Bacilli; o__Lactobacillales; f__Streptococcaceae; g__Streptococcus; s__Streptococcus_thermophilus	3.23186	NA		-	0.170504	0.0294953
k__Bacteria; p__Proteobacteria; c__Gammaproteobacteria; o__Enterobacteriales; f__Enterobacteriaceae; g__Enterobacter; s__Enterobacter_aerogenes	1.44654	NA		-	0	0.00279551
k__Bacteria; p__Bacteroidetes; c__Bacteroidia; o__Bacteroidales; f__Bacteroidaceae; g__Bacteroides; s__Bacteroides_sp_2_1_22	2.2827	NA		-	0.019166	0
k__Bacteria; p__Actinobacteria; c__Actinobacteria; o__Bifidobacteriales; f__Bifidobacteriaceae; g__Scardovia; s__Scardovia_wiggsiae	3.14422	NA		-	0.138997	0.00234192
k__Bacteria; p__Firmicutes; c__Bacilli; o__Lactobacillales; f__Streptococcaceae; g__Streptococcus; s__Streptococcus_salivarius	4.10269	NA		-	1.2437	1.26606
k__Bacteria; p__Firmicutes; c__Clostridia; o__Clostridiales; f__Ruminococcaceae; g__Subdoligranulum; s__Subdoligranulum_variabile	0.881663	NA		-	0.000761379	6.05128e-05
k__Bacteria; p__Proteobacteria; c__Deltaproteobacteria; o__Desulfovibrionales; f__Desulfovibrionaceae; g__Bilophila; s__Bilophila_unclassified	3.68137	NA		-	0.463057	0.479871
k__Bacteria; p__Firmicutes; c__Bacilli; o__Lactobacillales; f__Streptococcaceae; g__Streptococcus; s__Streptococcus_constellatus	2.17533	NA		-	0.0149244	0.00143769
k__Bacteria; p__Bacteroidetes; c__Bacteroidia; o__Bacteroidales; f__Bacteroidaceae; g__Bacteroides; s__Bacteroides_intestinalis	2.5563	NA		-	0.025199	0.0359631
k__Bacteria; p__Actinobacteria; c__Actinobacteria; o__Actinomycetales; f__Corynebacteriaceae; g__Corynebacterium; s__Corynebacterium_pseudodiphtheriticum	0.0960678	NA		-	0.000124713	0
k__Bacteria; p__Firmicutes; c__Negativicutes; o__Selenomonadales; f__Acidaminococcaceae; g__Acidaminococcus; s__Acidaminococcus_fermentans	1.93915	NA		-	0.00868954	0.00051141
k__Bacteria; p__Firmicutes; c__Clostridia; o__Clostridiales; f__Lachnospiraceae; g__Lachnospiraceae_noname; s__Lachnospiraceae_bacterium_3_1_46FAA	2.93518	NA		-	0.0860936	0.0701553
k__Bacteria; p__Firmicutes; c__Clostridia; o__Clostridiales; f__Peptostreptococcaceae; g__Peptostreptococcaceae_noname; s__Clostridium_bifermentans	0.571201	NA		-	0	0.000372564
k__Bacteria; p__Actinobacteria; c__Actinobacteria; o__Actinomycetales; f__Actinomycetaceae; g__Actinomyces; s__Actinomyces_sp_ICM47	2.1151	NA		-	0.0130111	0.00184692
k__Bacteria; p__Actinobacteria; c__Actinobacteria; o__Actinomycetales; f__Actinomycetaceae; g__Actinobaculum; s__Actinobaculum_schaalii	1.5315	NA		-	0.00339989	0
k__Bacteria; p__Firmicutes; c__Bacilli; o__Lactobacillales; f__Carnobacteriaceae; g__Granulicatella; s__Granulicatella_adiacens	2.54345	NA		-	0.0348486	0.00600795
k__Bacteria; p__Actinobacteria; c__Actinobacteria; o__Actinomycetales; f__Micrococcaceae; g__Rothia; s__Rothia_dentocariosa	1.91114	NA		-	0.00814517	0.00272218
k__Bacteria; p__Firmicutes; c__Clostridia; o__Clostridiales; f__Clostridiales_noname; g__Pseudoflavonifractor; s__Pseudoflavonifractor_capillosus	0.854109	NA		-	0.000714368	0.000447821
k__Bacteria; p__Firmicutes; c__Erysipelotrichia; o__Erysipelotrichales; f__Erysipelotrichaceae; g__Turicibacter; s__Turicibacter_unclassified	2.36337	NA		-	0.00136908	0.0230832
k__Bacteria; p__Actinobacteria; c__Actinobacteria; o__Actinomycetales; f__Actinomycetales_noname; g__Tropheryma; s__Tropheryma_whipplei	0	NA		-	0	4.23077e-06
k__Bacteria; p__Proteobacteria; c__Betaproteobacteria; o__Neisseriales; f__Neisseriaceae; g__Neisseria; s__Neisseria_subflava	0	NA		-	3.44828e-05	0
k__Bacteria; p__Firmicutes; c__Bacilli; o__Lactobacillales; f__Lactobacillaceae; g__Lactobacillus; s__Lactobacillus_amylovorus	0	NA		-	4.04598e-05	0
k__Bacteria; p__Bacteroidetes; c__Bacteroidia; o__Bacteroidales; f__Prevotellaceae; g__Prevotella; s__Prevotella_buccae	1.95497	NA		-	0	0.0090109
k__Bacteria; p__Firmicutes; c__Bacilli; o__Lactobacillales; f__Streptococcaceae; g__Streptococcus; s__Streptococcus_tigurinus	1.20309	NA		-	0.00159379	0.000853205
k__Bacteria; p__Firmicutes; c__Clostridia; o__Clostridiales; f__Lachnospiraceae; g__Lachnoanaerobaculum; s__Lachnoanaerobaculum_saburreum	0.947369	NA		-	0.000882414	0
k__Bacteria; p__Firmicutes; c__Clostridia; o__Clostridiales; f__Lachnospiraceae; g__Lachnospiraceae_noname; s__Lachnospiraceae_bacterium_1_1_57FAA	3.78408	NA		-	0.466492	0.608054
k__Bacteria; p__Proteobacteria; c__Gammaproteobacteria; o__Enterobacteriales; f__Enterobacteriaceae; g__Enterobacteriaceae_noname; s__Enterobacteriaceae_bacterium_9_2_54FAA	0.0343877	NA		-	0	0.000108205
k__Bacteria; p__Firmicutes; c__Bacilli; o__Bacillales; f__Staphylococcaceae; g__Staphylococcus; s__Staphylococcus_haemolyticus	0.459943	NA		-	0.000288276	0
k__Bacteria; p__Firmicutes; c__Negativicutes; o__Selenomonadales; f__Veillonellaceae; g__Megasphaera; s__Megasphaera_elsdenii	2.0911	NA		-	0.0123097	0.000357949
k__Bacteria; p__Firmicutes; c__Clostridia; o__Clostridiales; f__Lachnospiraceae; g__Oribacterium; s__Oribacterium_sinus	2.64502	NA		-	0.0439909	0.000235256
k__Bacteria; p__Actinobacteria; c__Actinobacteria; o__Coriobacteriales; f__Coriobacteriaceae; g__Coriobacteriaceae_noname; s__Coriobacteriaceae_bacterium_phI	3.13585	NA		-	0.00787885	0.13668
k__Bacteria; p__Bacteroidetes; c__Bacteroidia; o__Bacteroidales; f__Porphyromonadaceae; g__Odoribacter; s__Odoribacter_unclassified	1.37616	NA		-	0.000892874	0.00237744
k__Bacteria; p__Bacteroidetes; c__Bacteroidia; o__Bacteroidales; f__Rikenellaceae; g__Alistipes; s__Alistipes_putredinis	4.07545	NA		-	0.922849	1.18929
k__Bacteria; p__Bacteroidetes; c__Bacteroidia; o__Bacteroidales; f__Bacteroidaceae; g__Bacteroides; s__Bacteroides_sp_4_3_47FAA	2.83339	NA		-	0	0.0680985
k__Bacteria; p__Firmicutes; c__Bacilli; o__Lactobacillales; f__Streptococcaceae; g__Streptococcus; s__Streptococcus_infantarius	3.0135	NA		-	0.102979	0.00395397
k__Bacteria; p__Firmicutes; c__Bacilli; o__Bacillales; f__Bacillales_noname; g__Gemella; s__Gemella_haemolysans	3.21875	NA		-	0.165123	0.00133179
k__Bacteria; p__Firmicutes; c__Bacilli; o__Lactobacillales; f__Leuconostocaceae; g__Leuconostoc; s__Leuconostoc_gelidum	1.14718	NA		-	0.000584713	0.00140308
k__Bacteria; p__Firmicutes; c__Erysipelotrichia; o__Erysipelotrichales; f__Erysipelotrichaceae; g__Erysipelotrichaceae_noname; s__Erysipelotrichaceae_bacterium_21_3	2.0145	NA		-	0.0103361	0.00328205
k__Bacteria; p__Firmicutes; c__Bacilli; o__Lactobacillales; f__Leuconostocaceae; g__Leuconostoc; s__Leuconostoc_unclassified	1.43729	NA		-	0.00190943	0.00273679
k__Bacteria; p__Actinobacteria; c__Actinobacteria; o__Bifidobacteriales; f__Bifidobacteriaceae; g__Alloscardovia; s__Alloscardovia_omnicolens	3.558	NA		-	0.360335	0.00937487
k__Bacteria; p__Firmicutes; c__Bacilli; o__Lactobacillales; f__Lactobacillaceae; g__Lactobacillus; s__Lactobacillus_rossiae	1.50206	NA		-	0.00317034	0.000482308
k__Bacteria; p__Firmicutes; c__Bacilli; o__Lactobacillales; f__Streptococcaceae; g__Streptococcus; s__Streptococcus_agalactiae	1.03584	NA		-	3.33333e-06	0.0010859
k__Bacteria; p__Firmicutes; c__Clostridia; o__Clostridiales; f__Lachnospiraceae; g__Shuttleworthia; s__Shuttleworthia_satelles	1.31951	NA		-	0.00207943	5.0641e-05
k__Bacteria; p__Firmicutes; c__Bacilli; o__Lactobacillales; f__Enterococcaceae; g__Enterococcus; s__Enterococcus_asini	0.0196039	NA		-	0	0.000104615
k__Bacteria; p__Firmicutes; c__Bacilli; o__Lactobacillales; f__Enterococcaceae; g__Enterococcus; s__Enterococcus_cecorum	0.0313197	NA		-	0.000107241	0
k__Bacteria; p__Firmicutes; c__Erysipelotrichia; o__Erysipelotrichales; f__Erysipelotrichaceae; g__Coprobacillus; s__Coprobacillus_sp_29_1	3.15254	NA		-	0.142079	0.0106797
k__Bacteria; p__Proteobacteria; c__Gammaproteobacteria; o__Pasteurellales; f__Pasteurellaceae; g__Haemophilus; s__Haemophilus_sputorum	0	NA		-	0	1.30769e-05
k__Bacteria; p__Actinobacteria; c__Actinobacteria; o__Coriobacteriales; f__Coriobacteriaceae; g__Eggerthella; s__Eggerthella_unclassified	3.89214	NA		-	0.779802	0.604164
k__Bacteria; p__Proteobacteria; c__Betaproteobacteria; o__Burkholderiales; f__Sutterellaceae; g__Parasutterella; s__Parasutterella_excrementihominis	2.52648	NA		-	0.0336095	0.0311229
k__Bacteria; p__Proteobacteria; c__Epsilonproteobacteria; o__Campylobacterales; f__Campylobacteraceae; g__Campylobacter; s__Campylobacter_jejuni	0	NA		-	7.35632e-06	0
k__Bacteria; p__Proteobacteria; c__Gammaproteobacteria; o__Enterobacteriales; f__Enterobacteriaceae; g__Hafnia; s__Hafnia_alvei	0.0302515	NA		-	0	0.000107179
k__Bacteria; p__Firmicutes; c__Bacilli; o__Lactobacillales; f__Enterococcaceae; g__Enterococcus; s__Enterococcus_faecium	4.03013	NA		-	1.07182	0.639499
k__Bacteria; p__Actinobacteria; c__Actinobacteria; o__Coriobacteriales; f__Coriobacteriaceae; g__Cryptobacterium; s__Cryptobacterium_curtum	1.30148	NA		-	0.00199678	4.79487e-05
k__Bacteria; p__Bacteroidetes; c__Bacteroidia; o__Bacteroidales; f__Porphyromonadaceae; g__Parabacteroides; s__Parabacteroides_goldsteinii	2.8988	NA		-	0.0460109	0.0791805
k__Bacteria; p__Bacteroidetes; c__Bacteroidia; o__Bacteroidales; f__Bacteroidaceae; g__Bacteroides; s__Bacteroides_coprophilus	3.11227	NA		-	0.129499	0.0275163
k__Bacteria; p__Firmicutes; c__Negativicutes; o__Selenomonadales; f__Veillonellaceae; g__Veillonella; s__Veillonella_dispar	1.58963	NA		-	0.00226437	0.00388692
k__Bacteria; p__Firmicutes; c__Erysipelotrichia; o__Erysipelotrichales; f__Erysipelotrichaceae; g__Erysipelotrichaceae_noname; s__Erysipelotrichaceae_bacterium_3_1_53	2.6287	NA		-	0.0425223	0.0257219
k__Bacteria; p__Firmicutes; c__Bacilli; o__Lactobacillales; f__Streptococcaceae; g__Streptococcus; s__Streptococcus_vestibularis	3.34396	NA		-	0.220743	0.0164267
k__Bacteria; p__Actinobacteria; c__Actinobacteria; o__Actinomycetales; f__Actinomycetaceae; g__Actinomyces; s__Actinomyces_sp_HPA0247	2.38428	NA		-	0.0241862	0.00370436
k__Bacteria; p__Firmicutes; c__Bacilli; o__Lactobacillales; f__Streptococcaceae; g__Streptococcus; s__Streptococcus_sp_BS35b	0.807308	NA		-	0.000641494	0.000355
k__Bacteria; p__Actinobacteria; c__Actinobacteria; o__Actinomycetales; f__Propionibacteriaceae; g__Propionibacterium; s__Propionibacterium_avidum	0	NA		-	1.3908e-05	0
k__Bacteria; p__Firmicutes; c__Clostridia; o__Clostridiales; f__Lachnospiraceae; g__Coprococcus; s__Coprococcus_sp_ART55_1	3.96353	NA		-	0.456963	0.919311
k__Bacteria; p__Firmicutes; c__Clostridia; o__Clostridiales; f__Clostridiales_Family_XI_Incertae_Sedis; g__Peptoniphilus; s__Peptoniphilus_harei	0.898703	NA		-	7.91954e-05	0.000791923
k__Bacteria; p__Proteobacteria; c__Gammaproteobacteria; o__Enterobacteriales; f__Enterobacteriaceae; g__Morganella; s__Morganella_morganii	0	NA		-	4.58621e-05	7.89744e-05
k__Bacteria; p__Bacteroidetes; c__Bacteroidia; o__Bacteroidales; f__Bacteroidaceae; g__Bacteroides; s__Bacteroides_sp_1_1_6	1.69646	NA		-	0	0.00497103
k__Bacteria; p__Firmicutes; c__Negativicutes; o__Selenomonadales; f__Veillonellaceae; g__Dialister; s__Dialister_micraerophilus	0.447815	NA		-	0	0.000280385
k__Bacteria; p__Firmicutes; c__Bacilli; o__Lactobacillales; f__Lactobacillaceae; g__Lactobacillus; s__Lactobacillus_rhamnosus	2.10942	NA		-	0.012861	0.000628205
k__Bacteria; p__Firmicutes; c__Clostridia; o__Clostridiales; f__Lachnospiraceae; g__Anaerostipes; s__Anaerostipes_unclassified	3.19943	NA		-	0.15828	0.0493978
k__Archaea; p__Euryarchaeota; c__Methanobacteria; o__Methanobacteriales; f__Methanobacteriaceae; g__Methanobrevibacter; s__Methanobrevibacter_smithii	3.41552	NA		-	0.0677143	0.2603
k__Bacteria; p__Bacteroidetes; c__Bacteroidia; o__Bacteroidales; f__Rikenellaceae; g__Alistipes; s__Alistipes_indistinctus	3.06168	NA		-	0.0667895	0.11522
k__Bacteria; p__Proteobacteria; c__Gammaproteobacteria; o__Enterobacteriales; f__Enterobacteriaceae; g__Citrobacter; s__Citrobacter_koseri	0.594823	NA		-	0.000393333	0
k__Bacteria; p__Bacteroidetes; c__Bacteroidia; o__Bacteroidales; f__Bacteroidales_noname; g__Bacteroidales_noname; s__Bacteroidales_bacterium_ph8	3.00911	NA		-	0.0706263	0.102078
k__Bacteria; p__Bacteroidetes; c__Bacteroidia; o__Bacteroidales; f__Prevotellaceae; g__Prevotella; s__Prevotella_bivia	2.03541	NA		-	0.0108408	0.00117026
k__Bacteria; p__Bacteroidetes; c__Bacteroidia; o__Bacteroidales; f__Porphyromonadaceae; g__Butyricimonas; s__Butyricimonas_synergistica	0.820215	NA		-	0.000660805	3.53846e-05
k__Bacteria; p__Firmicutes; c__Clostridia; o__Clostridiales; f__Clostridiales_Family_XI_Incertae_Sedis; g__Parvimonas; s__Parvimonas_unclassified	2.71646	NA		-	0.0520093	0.00487949
k__Bacteria; p__Firmicutes; c__Clostridia; o__Clostridiales; f__Lachnospiraceae; g__Coprococcus; s__Coprococcus_eutactus	2.98052	NA		-	0.0189285	0.0956135
k__Bacteria; p__Firmicutes; c__Bacilli; o__Bacillales; f__Staphylococcaceae; g__Staphylococcus; s__Staphylococcus_xylosus	0.29805	NA		-	0	0.00019859
k__Bacteria; p__Bacteroidetes; c__Bacteroidia; o__Bacteroidales; f__Bacteroidaceae; g__Bacteroides; s__Bacteroides_massiliensis	3.93046	NA		-	0.851738	0.177567
k__Bacteria; p__Proteobacteria; c__Gammaproteobacteria; o__Pasteurellales; f__Pasteurellaceae; g__Aggregatibacter; s__Aggregatibacter_segnis	0.242448	NA		-	0.000174253	0
k__Bacteria; p__Firmicutes; c__Bacilli; o__Bacillales; f__Staphylococcaceae; g__Staphylococcus; s__Staphylococcus_pasteuri	1.01597	NA		-	0.0010354	0
k__Bacteria; p__Firmicutes; c__Bacilli; o__Lactobacillales; f__Streptococcaceae; g__Streptococcus; s__Streptococcus_mitis_oralis_pneumoniae	3.12952	NA		-	0.134459	0.0222735
k__Bacteria; p__Firmicutes; c__Bacilli; o__Lactobacillales; f__Enterococcaceae; g__Enterococcus; s__Enterococcus_gallinarum	1.4404	NA		-	0.00275667	0.000197051
k__Bacteria; p__Actinobacteria; c__Actinobacteria; o__Coriobacteriales; f__Coriobacteriaceae; g__Atopobium; s__Atopobium_sp_ICM58	1.22406	NA		-	0	0.00167487
k__Bacteria; p__Firmicutes; c__Bacilli; o__Lactobacillales; f__Streptococcaceae; g__Streptococcus; s__Streptococcus_urinalis	0.112204	NA		-	0.000129195	0
k__Bacteria; p__Firmicutes; c__Clostridia; o__Clostridiales; f__Lachnospiraceae; g__Lachnospiraceae_noname; s__Lachnospiraceae_bacterium_5_1_57FAA	2.23424	NA		-	0.0171433	0.0158118
k__Bacteria; p__Firmicutes; c__Clostridia; o__Clostridiales; f__Lachnospiraceae; g__Lachnospiraceae_noname; s__Lachnospiraceae_bacterium_oral_taxon_082	1.21474	NA		-	0.00163322	0
k__Bacteria; p__Actinobacteria; c__Actinobacteria; o__Actinomycetales; f__Dermabacteraceae; g__Brachybacterium; s__Brachybacterium_squillarum	0.315081	NA		-	0	0.000206538
k__Bacteria; p__Firmicutes; c__Clostridia; o__Clostridiales; f__Lachnospiraceae; g__Lachnospiraceae_noname; s__Lachnospiraceae_bacterium_4_1_37FAA	1.48241	NA		-	0.00303609	0.0011359
k__Bacteria; p__Bacteroidetes; c__Bacteroidia; o__Bacteroidales; f__Porphyromonadaceae; g__Parabacteroides; s__Parabacteroides_johnsonii	2.74238	NA		-	0.0552503	0.0149321
k__Bacteria; p__Firmicutes; c__Clostridia; o__Clostridiales; f__Lachnospiraceae; g__Stomatobaculum; s__Stomatobaculum_longum	2.91095	NA		-	0.0812578	0
k__Bacteria; p__Proteobacteria; c__Betaproteobacteria; o__Burkholderiales; f__Sutterellaceae; g__Sutterella; s__Sutterella_parvirubra	1.85827	NA		-	0.00659736	0.00721487
k__Bacteria; p__Actinobacteria; c__Actinobacteria; o__Actinomycetales; f__Actinomycetaceae; g__Mobiluncus; s__Mobiluncus_curtisii	0	NA		-	0	6.33333e-05
k__Bacteria; p__Actinobacteria; c__Actinobacteria; o__Bifidobacteriales; f__Bifidobacteriaceae; g__Bifidobacterium; s__Bifidobacterium_dentium	3.06559	NA		-	0.116234	0.0254223
k__Bacteria; p__Firmicutes; c__Bacilli; o__Lactobacillales; f__Streptococcaceae; g__Streptococcus; s__Streptococcus_intermedius	2.24147	NA		-	0.0174209	0.00243782
k__Bacteria; p__Actinobacteria; c__Actinobacteria; o__Bifidobacteriales; f__Bifidobacteriaceae; g__Bifidobacterium; s__Bifidobacterium_bifidum	4.11354	NA		-	0.996006	1.29831
k__Bacteria; p__Proteobacteria; c__Epsilonproteobacteria; o__Campylobacterales; f__Campylobacteraceae; g__Campylobacter; s__Campylobacter_ureolyticus	0	NA		-	4.56322e-05	0
k__Bacteria; p__Proteobacteria; c__Gammaproteobacteria; o__Enterobacteriales; f__Enterobacteriaceae; g__Klebsiella; s__Klebsiella_oxytoca	1.78681	NA		-	0.0029408	0.00611897
k__Bacteria; p__Actinobacteria; c__Actinobacteria; o__Coriobacteriales; f__Coriobacteriaceae; g__Eggerthella; s__Eggerthella_sp_1_3_56FAA	2.16052	NA		-	0.0144714	0.00273628
k__Bacteria; p__Firmicutes; c__Clostridia; o__Clostridiales; f__Lachnospiraceae; g__Oribacterium; s__Oribacterium_sp_oral_taxon_078	1.5886	NA		-	0.00386747	0
k__Bacteria; p__Firmicutes; c__Bacilli; o__Lactobacillales; f__Streptococcaceae; g__Streptococcus; s__Streptococcus_parauberis	1.58044	NA		-	0.00379747	0.000658333
k__Bacteria; p__Firmicutes; c__Clostridia; o__Clostridiales; f__Lachnospiraceae; g__Lachnospiraceae_noname; s__Lachnospiraceae_oral_taxon_107	0.104359	NA		-	0.000126667	0
k__Bacteria; p__Proteobacteria; c__Gammaproteobacteria; o__Aeromonadales; f__Succinivibrionaceae; g__Succinatimonas; s__Succinatimonas_hippei	1.32971	NA		-	0.00213632	6.23077e-05
k__Bacteria; p__Firmicutes; c__Clostridia; o__Clostridiales; f__Lachnospiraceae; g__Oribacterium; s__Oribacterium_sp_ACB8	1.91753	NA		-	0.00823816	0
k__Bacteria; p__Bacteroidetes; c__Bacteroidia; o__Bacteroidales; f__Porphyromonadaceae; g__Barnesiella; s__Barnesiella_intestinihominis	3.55744	NA		-	0.360831	0.223519
k__Bacteria; p__Proteobacteria; c__Betaproteobacteria; o__Neisseriales; f__Neisseriaceae; g__Neisseria; s__Neisseria_flavescens	1.32829	NA		-	0.00212126	0
k__Bacteria; p__Actinobacteria; c__Actinobacteria; o__Coriobacteriales; f__Coriobacteriaceae; g__Slackia; s__Slackia_exigua	1.59513	NA		-	0.00392195	0.000158333
k__Bacteria; p__Bacteroidetes; c__Bacteroidia; o__Bacteroidales; f__Prevotellaceae; g__Prevotella; s__Prevotella_buccalis	0.792272	NA		-	0.000293678	0.000619744
k__Bacteria; p__Actinobacteria; c__Actinobacteria; o__Actinomycetales; f__Actinomycetaceae; g__Actinomyces; s__Actinomyces_timonensis	0.586042	NA		-	0.000385402	9.48718e-05
k__Bacteria; p__Proteobacteria; c__Deltaproteobacteria; o__Desulfovibrionales; f__Desulfovibrionaceae; g__Desulfovibrio; s__Desulfovibrio_piger	2.66761	NA		-	0.0353608	0.0465079
k__Bacteria; p__Proteobacteria; c__Epsilonproteobacteria; o__Campylobacterales; f__Campylobacteraceae; g__Campylobacter; s__Campylobacter_hominis	0.749979	NA		-	0.000562184	0.000367564
k__Bacteria; p__Firmicutes; c__Erysipelotrichia; o__Erysipelotrichales; f__Erysipelotrichaceae; g__Holdemania; s__Holdemania_sp_AP2	1.36158	NA		-	0.0022992	0
k__Bacteria; p__Firmicutes; c__Bacilli; o__Lactobacillales; f__Lactobacillaceae; g__Lactobacillus; s__Lactobacillus_fermentum	1.91355	NA		-	0.00819057	0.00112808
k__Bacteria; p__Firmicutes; c__Bacilli; o__Bacillales; f__Staphylococcaceae; g__Macrococcus; s__Macrococcus_caseolyticus	0.493034	NA		-	0	0.000311154
k__Bacteria; p__Proteobacteria; c__Gammaproteobacteria; o__Enterobacteriales; f__Enterobacteriaceae; g__Shigella; s__Shigella_sonnei	1.50661	NA		-	0.00321046	0.000258205
k__Bacteria; p__Firmicutes; c__Bacilli; o__Lactobacillales; f__Lactobacillaceae; g__Lactobacillus; s__Lactobacillus_mucosae	2.14854	NA		-	0.000468966	0.0140769
k__Bacteria; p__Bacteroidetes; c__Bacteroidia; o__Bacteroidales; f__Porphyromonadaceae; g__Coprobacter; s__Coprobacter_fastidiosus	2.28194	NA		-	0.0111969	0.0191392
k__Bacteria; p__Bacteroidetes; c__Bacteroidia; o__Bacteroidales; f__Bacteroidaceae; g__Bacteroides; s__Bacteroides_salyersiae	3.22471	NA		-	0.167745	0.060271
k__Bacteria; p__Firmicutes; c__Erysipelotrichia; o__Erysipelotrichales; f__Erysipelotrichaceae; g__Turicibacter; s__Turicibacter_sanguinis	1.97061	NA		-	0.000353448	0.00934423
k__Bacteria; p__Actinobacteria; c__Actinobacteria; o__Actinomycetales; f__Propionibacteriaceae; g__Propionibacterium; s__Propionibacterium_acnes	1.05169	NA		-	0.00112276	0
k__Bacteria; p__Firmicutes; c__Clostridia; o__Clostridiales; f__Peptostreptococcaceae; g__Peptostreptococcus; s__Peptostreptococcus_stomatis	2.85041	NA		-	0.0707483	0.00427026
k__Bacteria; p__Firmicutes; c__Bacilli; o__Lactobacillales; f__Lactobacillaceae; g__Lactobacillus; s__Lactobacillus_brevis	0	NA		-	2.74713e-05	0
k__Bacteria; p__Actinobacteria; c__Actinobacteria; o__Actinomycetales; f__Micrococcaceae; g__Kocuria; s__Kocuria_rhizophila	0.156446	NA		-	9.74713e-05	0.000143333
k__Bacteria; p__Firmicutes; c__Negativicutes; o__Selenomonadales; f__Acidaminococcaceae; g__Acidaminococcus; s__Acidaminococcus_intestini	1.97604	NA		-	0.00204563	0.00944782
k__Bacteria; p__Actinobacteria; c__Actinobacteria; o__Coriobacteriales; f__Coriobacteriaceae; g__Atopobium; s__Atopobium_minutum	1.81827	NA		-	0.00655494	0
k__Bacteria; p__Firmicutes; c__Clostridia; o__Clostridiales; f__Eubacteriaceae; g__Eubacterium; s__Eubacterium_saphenum	1.35539	NA		-	0.00226391	0.00179038
k__Bacteria; p__Actinobacteria; c__Actinobacteria; o__Actinomycetales; f__Actinomycetaceae; g__Actinomyces; s__Actinomyces_massiliensis	2.10726	NA		-	0.0127678	0.00460449
k__Bacteria; p__Proteobacteria; c__Gammaproteobacteria; o__Enterobacteriales; f__Enterobacteriaceae; g__Raoultella; s__Raoultella_ornithinolytica	3.05494	NA		-	0.113479	0.000338333
k__Bacteria; p__Proteobacteria; c__Deltaproteobacteria; o__Desulfovibrionales; f__Desulfovibrionaceae; g__Bilophila; s__Bilophila_sp_4_1_30	2.06739	NA		-	0.00343069	0.0116785
k__Bacteria; p__Proteobacteria; c__Betaproteobacteria; o__Burkholderiales; f__Burkholderiaceae; g__Lautropia; s__Lautropia_mirabilis	1.49866	NA		-	0.00314184	0
k__Bacteria; p__Actinobacteria; c__Actinobacteria; o__Coriobacteriales; f__Coriobacteriaceae; g__Gordonibacter; s__Gordonibacter_pamelaeae	3.12675	NA		-	0.0548714	0.133676
k__Bacteria; p__Firmicutes; c__Bacilli; o__Lactobacillales; f__Leuconostocaceae; g__Weissella; s__Weissella_unclassified	1.00603	NA		-	0.000281609	0.00101295
k__Bacteria; p__Firmicutes; c__Bacilli; o__Lactobacillales; f__Leuconostocaceae; g__Weissella; s__Weissella_halotolerans	0.0524523	NA		-	0	0.000112821
k__Bacteria; p__Bacteroidetes; c__Bacteroidia; o__Bacteroidales; f__Prevotellaceae; g__Prevotella; s__Prevotella_timonensis	1.7484	NA		-	0.00020046	0.00560154
k__Bacteria; p__Proteobacteria; c__Betaproteobacteria; o__Neisseriales; f__Neisseriaceae; g__Eikenella; s__Eikenella_corrodens	0	NA		-	7.1954e-05	0
k__Bacteria; p__Actinobacteria; c__Actinobacteria; o__Actinomycetales; f__Corynebacteriaceae; g__Corynebacterium; s__Corynebacterium_kroppenstedtii	0	NA		-	1.49425e-05	0
k__Bacteria; p__Firmicutes; c__Negativicutes; o__Selenomonadales; f__Veillonellaceae; g__Dialister; s__Dialister_invisus	2.98088	NA		-	0.0258351	0.0956738
k__Bacteria; p__Proteobacteria; c__Gammaproteobacteria; o__Enterobacteriales; f__Enterobacteriaceae; g__Klebsiella; s__Klebsiella_variicola	0.136082	NA		-	0	0.000136795
k__Bacteria; p__Bacteroidetes; c__Bacteroidia; o__Bacteroidales; f__Bacteroidaceae; g__Bacteroides; s__Bacteroides_sp_3_1_19	2.82457	NA		-	0.0667652	0.00260487
k__Bacteria; p__Firmicutes; c__Bacilli; o__Lactobacillales; f__Enterococcaceae; g__Enterococcus; s__Enterococcus_hirae	0.813625	NA		-	0	0.000651026
k__Bacteria; p__Firmicutes; c__Bacilli; o__Lactobacillales; f__Leuconostocaceae; g__Leuconostoc; s__Leuconostoc_pseudomesenteroides	0.00988561	NA		-	0.000102184	0
k__Bacteria; p__Actinobacteria; c__Actinobacteria; o__Coriobacteriales; f__Coriobacteriaceae; g__Eggerthella; s__Eggerthella_lenta	3.15317	NA		-	0.142234	0.06431
k__Bacteria; p__Firmicutes; c__Negativicutes; o__Selenomonadales; f__Veillonellaceae; g__Veillonella; s__Veillonella_atypica	1.76855	NA		-	0.00585966	0.00517154
k__Bacteria; p__Firmicutes; c__Erysipelotrichia; o__Erysipelotrichales; f__Erysipelotrichaceae; g__Erysipelotrichaceae_noname; s__Eubacterium_dolichum	2.17769	NA		-	0.0150529	0.00249064
k__Bacteria; p__Bacteroidetes; c__Bacteroidia; o__Bacteroidales; f__Porphyromonadaceae; g__Porphyromonas; s__Porphyromonas_asaccharolytica	1.16098	NA		-	0.000699195	0.00144846
k__Bacteria; p__Firmicutes; c__Negativicutes; o__Selenomonadales; f__Veillonellaceae; g__Mitsuokella; s__Mitsuokella_multacida	3.25606	NA		-	0.178971	0.0585301
k__Bacteria; p__Firmicutes; c__Clostridia; o__Clostridiales; f__Eubacteriaceae; g__Pseudoramibacter; s__Pseudoramibacter_alactolyticus	0.067862	NA		-	0.000116897	0
k__Bacteria; p__Bacteroidetes; c__Bacteroidia; o__Bacteroidales; f__Bacteroidaceae; g__Bacteroides; s__Bacteroides_gallinarum	1.62992	NA		-	0.00426506	0
k__Bacteria; p__Proteobacteria; c__Gammaproteobacteria; o__Enterobacteriales; f__Enterobacteriaceae; g__Escherichia; s__Escherichia_hermannii	0	NA		-	1.29885e-05	0
k__Bacteria; p__Proteobacteria; c__Betaproteobacteria; o__Burkholderiales; f__Burkholderiaceae; g__Ralstonia; s__Ralstonia_pickettii	0	NA		-	2.63218e-05	0
k__Bacteria; p__Proteobacteria; c__Gammaproteobacteria; o__Pasteurellales; f__Pasteurellaceae; g__Haemophilus; s__Haemophilus_pittmaniae	0	NA		-	2.6092e-05	6.37179e-05
k__Bacteria; p__Actinobacteria; c__Actinobacteria; o__Coriobacteriales; f__Coriobacteriaceae; g__Atopobium; s__Atopobium_vaginae	1.90016	NA		-	0.00791747	0.00132513
k__Bacteria; p__Proteobacteria; c__Gammaproteobacteria; o__Enterobacteriales; f__Enterobacteriaceae; g__Klebsiella; s__Klebsiella_sp_MS_92_3	1.96823	NA		-	0	0.00929449
k__Bacteria; p__Actinobacteria; c__Actinobacteria; o__Actinomycetales; f__Actinomycetaceae; g__Actinomyces; s__Actinomyces_odontolyticus	2.72607	NA		-	0.0531515	0.0233918
k__Bacteria; p__Firmicutes; c__Bacilli; o__Lactobacillales; f__Carnobacteriaceae; g__Carnobacterium; s__Carnobacterium_maltaromaticum	1.47014	NA		-	0.00294839	0.00052
k__Bacteria; p__Firmicutes; c__Clostridia; o__Clostridiales; f__Lachnospiraceae; g__Lachnospiraceae_noname; s__Lachnospiraceae_bacterium_ICM7	1.48018	NA		-	0.00301241	0
k__Bacteria; p__Firmicutes; c__Bacilli; o__Lactobacillales; f__Streptococcaceae; g__Streptococcus; s__Streptococcus_sanguinis	2.71671	NA		-	0.0520371	0.0322997
k__Bacteria; p__Firmicutes; c__Clostridia; o__Clostridiales; f__Clostridiaceae; g__Clostridium; s__Clostridium_methylpentosum	2.18878	NA		-	0.015444	0.000308333
k__Bacteria; p__Bacteroidetes; c__Bacteroidia; o__Bacteroidales; f__Porphyromonadaceae; g__Porphyromonas; s__Porphyromonas_somerae	0.520946	NA		-	0.000331839	8.37179e-05
k__Bacteria; p__Firmicutes; c__Bacilli; o__Bacillales; f__Bacillales_noname; g__Gemella; s__Gemella_morbillorum	1.54445	NA		-	0.000981379	0.00350244
k__Bacteria; p__Firmicutes; c__Clostridia; o__Clostridiales; f__Ruminococcaceae; g__Ruminococcus; s__Ruminococcus_sp_JC304	2.88564	NA		-	0.0768441	0.0404568
k__Bacteria; p__Firmicutes; c__Clostridia; o__Clostridiales; f__Lachnospiraceae; g__Blautia; s__Blautia_hansenii	0	NA		-	1.57471e-05	0
k__Bacteria; p__Bacteroidetes; c__Bacteroidia; o__Bacteroidales; f__Bacteroidaceae; g__Bacteroides; s__Bacteroides_cellulosilyticus	3.36044	NA		-	0.229256	0.185288
k__Bacteria; p__Bacteroidetes; c__Bacteroidia; o__Bacteroidales; f__Rikenellaceae; g__Alistipes; s__Alistipes_senegalensis	1.892	NA		-	0.00489874	0.00779692
k__Bacteria; p__Actinobacteria; c__Actinobacteria; o__Actinomycetales; f__Micrococcaceae; g__Kocuria; s__Kocuria_unclassified	0.164369	NA		-	0.000145747	0.000105769
k__Bacteria; p__Bacteroidetes; c__Bacteroidia; o__Bacteroidales; f__Rikenellaceae; g__Alistipes; s__Alistipes_sp_AP11	2.67875	NA		-	0.0477149	0.035969
k__Bacteria; p__Firmicutes; c__Bacilli; o__Lactobacillales; f__Streptococcaceae; g__Streptococcus; s__Streptococcus_pseudopneumoniae	0	NA		-	0	2.51282e-05
k__Bacteria; p__Firmicutes; c__Bacilli; o__Lactobacillales; f__Lactobacillaceae; g__Lactobacillus; s__Lactobacillus_curvatus	2.01904	NA		-	0.0104268	0.000261667
k__Bacteria; p__Firmicutes; c__Bacilli; o__Lactobacillales; f__Lactobacillaceae; g__Lactobacillus; s__Lactobacillus_salivarius	2.85078	NA		-	0.070912	0.00221244
k__Bacteria; p__Bacteroidetes; c__Bacteroidia; o__Bacteroidales; f__Prevotellaceae; g__Paraprevotella; s__Paraprevotella_unclassified	3.36049	NA		-	0.22933	0.0976837
k__Bacteria; p__Bacteroidetes; c__Bacteroidia; o__Bacteroidales; f__Bacteroidaceae; g__Bacteroides; s__Bacteroides_clarus	3.11974	NA		-	0.131739	0.0388164
k__Bacteria; p__Bacteroidetes; c__Bacteroidia; o__Bacteroidales; f__Rikenellaceae; g__Alistipes; s__Alistipes_unclassified	2.59536	NA		-	0.0391514	0.00606718
k__Bacteria; p__Firmicutes; c__Bacilli; o__Lactobacillales; f__Streptococcaceae; g__Streptococcus; s__Streptococcus_sobrinus	0.834206	NA		-	0.00068023	0.000586795
k__Bacteria; p__Firmicutes; c__Bacilli; o__Lactobacillales; f__Lactobacillaceae; g__Lactobacillus; s__Lactobacillus_delbrueckii	0.787622	NA		-	0.000613103	0
k__Bacteria; p__Firmicutes; c__Clostridia; o__Clostridiales; f__Clostridiales_Family_XI_Incertae_Sedis; g__Anaerococcus; s__Anaerococcus_vaginalis	1.67604	NA		-	0.00474103	0.000107436
k__Bacteria; p__Actinobacteria; c__Actinobacteria; o__Bifidobacteriales; f__Bifidobacteriaceae; g__Bifidobacterium; s__Bifidobacterium_catenulatum	2.71885	NA		-	0.0158338	0.0523365
k__Bacteria; p__Firmicutes; c__Bacilli; o__Lactobacillales; f__Streptococcaceae; g__Streptococcus; s__Streptococcus_pasteurianus	1.67024	NA		-	0.00263172	0.00467974
k__Bacteria; p__Firmicutes; c__Clostridia; o__Clostridiales; f__Clostridiaceae; g__Clostridium; s__Clostridium_sp_KLE_1755	1.68836	NA		-	0	0.00487885
k__Bacteria; p__Firmicutes; c__Clostridia; o__Clostridiales; f__Peptostreptococcaceae; g__Peptostreptococcaceae_noname; s__Clostridium_hiranonis	3.18985	NA		-	0.154807	0
k__Bacteria; p__Proteobacteria; c__Betaproteobacteria; o__Burkholderiales; f__Burkholderiales_noname; g__Burkholderiales_noname; s__Burkholderiales_bacterium_1_1_47	2.59795	NA		-	0.0262948	0.0396194
k__Bacteria; p__Firmicutes; c__Clostridia; o__Clostridiales; f__Lachnospiraceae; g__Dorea; s__Dorea_unclassified	2.77895	NA		-	0.0162587	0.0601038
k__Bacteria; p__Actinobacteria; c__Actinobacteria; o__Actinomycetales; f__Corynebacteriaceae; g__Corynebacterium; s__Corynebacterium_amycolatum	0	NA		-	5.17241e-05	0
k__Bacteria; p__Actinobacteria; c__Actinobacteria; o__Actinomycetales; f__Actinomycetaceae; g__Actinobaculum; s__Actinobaculum_sp_oral_taxon_183	2.06785	NA		-	0.0116524	0
k__Bacteria; p__Proteobacteria; c__Gammaproteobacteria; o__Pseudomonadales; f__Pseudomonadaceae; g__Pseudomonas; s__Pseudomonas_aeruginosa	1.55923	NA		-	0.0036177	0
k__Bacteria; p__Actinobacteria; c__Actinobacteria; o__Actinomycetales; f__Actinomycetaceae; g__Actinomyces; s__Actinomyces_turicensis	2.37233	NA		-	0.0235586	0.010056
k__Bacteria; p__Firmicutes; c__Bacilli; o__Lactobacillales; f__Leuconostocaceae; g__Weissella; s__Weissella_paramesenteroides	1.81419	NA		-	0.00650483	1.21795e-05
k__Bacteria; p__Actinobacteria; c__Actinobacteria; o__Actinomycetales; f__Propionibacteriaceae; g__Propionibacterium; s__Propionibacterium_freudenreichii	0	NA		-	9.5977e-05	0
k__Bacteria; p__Firmicutes; c__Bacilli; o__Lactobacillales; f__Streptococcaceae; g__Streptococcus; s__Streptococcus_infantis	2.42513	NA		-	0.0265667	0.0177417
k__Bacteria; p__Proteobacteria; c__Gammaproteobacteria; o__Pseudomonadales; f__Pseudomonadaceae; g__Pseudomonas; s__Pseudomonas_unclassified	0.333281	NA		-	0.000215057	0
k__Bacteria; p__Actinobacteria; c__Actinobacteria; o__Bifidobacteriales; f__Bifidobacteriaceae; g__Gardnerella; s__Gardnerella_vaginalis	1.69378	NA		-	0.00325517	0.00492718
k__Bacteria; p__Firmicutes; c__Clostridia; o__Clostridiales; f__Peptostreptococcaceae; g__Peptostreptococcus; s__Peptostreptococcus_anaerobius	1.86274	NA		-	0.0072877	0.000630769
k__Bacteria; p__Firmicutes; c__Clostridia; o__Clostridiales; f__Clostridiaceae; g__Clostridiaceae_noname; s__Clostridiaceae_bacterium_JC118	1.64178	NA		-	0.00222782	0.00438154
k__Bacteria; p__Firmicutes; c__Clostridia; o__Clostridiales; f__Eubacteriaceae; g__Eubacterium; s__Eubacterium_hallii	4.08317	NA		-	1.21043	1.07739
k__Bacteria; p__Bacteroidetes; c__Bacteroidia; o__Bacteroidales; f__Porphyromonadaceae; g__Porphyromonas; s__Porphyromonas_endodontalis	0.441106	NA		-	0.000275517	0
k__Bacteria; p__Bacteroidetes; c__Bacteroidia; o__Bacteroidales; f__Bacteroidaceae; g__Bacteroides; s__Bacteroides_oleiciplenus	0.229127	NA		-	0.000169425	0
k__Bacteria; p__Firmicutes; c__Clostridia; o__Clostridiales; f__Lachnospiraceae; g__Lachnospiraceae_noname; s__Lachnospiraceae_bacterium_7_1_58FAA	2.42078	NA		-	0.0263457	0.0109082
k__Bacteria; p__Bacteroidetes; c__Bacteroidia; o__Bacteroidales; f__Porphyromonadaceae; g__Odoribacter; s__Odoribacter_laneus	2.10984	NA		-	0.0128778	0.00238628

## Sheet: Table S3
	Variable	Species	Value	Coefficient	N	N.not.0	P.value	Q.value	mean relative abundance COVID-19 (%)	mean relative abundance non-COVID-19 (%)
1	antibiotics	k__Bacteria; p__Firmicutes; c__Clostridia; o__Clostridiales; f__Lachnospiraceae; g__Coprococcus; s__Coprococcus_comes	antibioticsYes	-0.508819	165	116	5.46428e-09	3.61258e-06	0.986766	1.36521
2	antibiotics	k__Bacteria; p__Firmicutes; c__Clostridia; o__Clostridiales; f__Lachnospiraceae; g__Dorea; s__Dorea_longicatena	antibioticsYes	-0.36852	165	135	9.60793e-09	3.61258e-06	1.08956	1.50229
3	antibiotics	k__Bacteria; p__Firmicutes; c__Clostridia; o__Clostridiales; f__Ruminococcaceae; g__Faecalibacterium; s__Faecalibacterium_prausnitzii	antibioticsYes	-0.317702	165	144	5.20647e-08	1.30509e-05	3.69383	5.89453
4	antibiotics	k__Bacteria; p__Firmicutes; c__Clostridia; o__Clostridiales; f__Lachnospiraceae; g__Blautia; s__Ruminococcus_obeum	antibioticsYes	-0.292809	165	157	8.69213e-08	1.63412e-05	1.68971	2.39657
5	antibiotics	k__Bacteria; p__Firmicutes; c__Clostridia; o__Clostridiales; f__Lachnospiraceae; g__Lachnospiraceae_noname; s__Lachnospiraceae_bacterium_5_1_63FAA	antibioticsYes	-0.216511	165	139	3.06768e-06	0.000384483	0.282364	0.277694
6	antibiotics	k__Bacteria; p__Actinobacteria; c__Actinobacteria; o__Bifidobacteriales; f__Bifidobacteriaceae; g__Parascardovia; s__Parascardovia_denticolens	antibioticsYes	0.0322389	165	10	8.30818e-06	0.000892536	0.00241517	0.000141026
7	antibiotics	k__Bacteria; p__Firmicutes; c__Clostridia; o__Clostridiales; f__Ruminococcaceae; g__Ruminococcus; s__Ruminococcus_sp_5_1_39BFAA	antibioticsYes	-0.366052	165	121	1.30955e-05	0.00123097	5.02324	3.90298
8	antibiotics	k__Bacteria; p__Actinobacteria; c__Actinobacteria; o__Bifidobacteriales; f__Bifidobacteriaceae; g__Bifidobacterium; s__Bifidobacterium_adolescentis	antibioticsYes	-0.258355	165	107	2.24305e-05	0.00187419	3.94378	7.77823
9	antibiotics	k__Bacteria; p__Firmicutes; c__Bacilli; o__Bacillales; f__Staphylococcaceae; g__Staphylococcus; s__Staphylococcus_epidermidis	antibioticsYes	0.0610448	165	5	4.01373e-05	0.0028131	0.0866191	0
10	antibiotics	k__Bacteria; p__Actinobacteria; c__Actinobacteria; o__Coriobacteriales; f__Coriobacteriaceae; g__Cryptobacterium; s__Cryptobacterium_curtum	antibioticsYes	0.0270007	165	6	4.11491e-05	0.0028131	0.00199678	4.79487e-05
11	antibiotics	k__Bacteria; p__Firmicutes; c__Bacilli; o__Lactobacillales; f__Enterococcaceae; g__Enterococcus; s__Enterococcus_avium	antibioticsYes	0.118292	165	18	4.86836e-05	0.00292041	0.0735003	0.231709
12	antibiotics	k__Bacteria; p__Firmicutes; c__Clostridia; o__Clostridiales; f__Eubacteriaceae; g__Eubacterium; s__Eubacterium_hallii	antibioticsYes	-0.327843	165	141	5.04858e-05	0.00292041	1.21043	1.07739
13	antibiotics	k__Bacteria; p__Actinobacteria; c__Actinobacteria; o__Coriobacteriales; f__Coriobacteriaceae; g__Olsenella; s__Olsenella_profusa	antibioticsYes	0.0495095	165	8	6.04388e-05	0.00324643	0.00659724	0.000186923
14	antibiotics	k__Bacteria; p__Actinobacteria; c__Actinobacteria; o__Coriobacteriales; f__Coriobacteriaceae; g__Olsenella; s__Olsenella_uli	antibioticsYes	0.0742064	165	30	8.32548e-05	0.00406931	0.380241	0.00120077
15	antibiotics	k__Bacteria; p__Firmicutes; c__Clostridia; o__Clostridiales; f__Eubacteriaceae; g__Eubacterium; s__Eubacterium_ramulus	antibioticsYes	-0.218003	165	103	8.6581e-05	0.00406931	0.353715	0.242591
16	antibiotics	k__Bacteria; p__Bacteroidetes; c__Bacteroidia; o__Bacteroidales; f__Bacteroidaceae; g__Bacteroides; s__Bacteroides_ovatus	antibioticsYes	-0.268609	165	134	0.000174989	0.00731065	1.9207	0.61563
17	antibiotics	k__Bacteria; p__Actinobacteria; c__Actinobacteria; o__Bifidobacteriales; f__Bifidobacteriaceae; g__Scardovia; s__Scardovia_wiggsiae	antibioticsYes	0.0641521	165	35	0.000226442	0.0081088	0.138997	0.00234192
18	antibiotics	k__Bacteria; p__Firmicutes; c__Clostridia; o__Clostridiales; f__Lachnospiraceae; g__Roseburia; s__Roseburia_inulinivorans	antibioticsYes	-0.284972	165	118	0.00024721	0.00845009	0.94139	0.881948
19	antibiotics	k__Bacteria; p__Firmicutes; c__Clostridia; o__Clostridiales; f__Lachnospiraceae; g__Anaerostipes; s__Anaerostipes_hadrus	antibioticsYes	-0.13774	165	116	0.00027956	0.00914038	0.145387	0.0568254
20	antibiotics	k__Bacteria; p__Bacteroidetes; c__Bacteroidia; o__Bacteroidales; f__Bacteroidaceae; g__Bacteroides; s__Bacteroides_caccae	antibioticsYes	-0.198417	165	102	0.00031153	0.00976126	1.4578	0.413354
21	antibiotics	k__Bacteria; p__Actinobacteria; c__Actinobacteria; o__Actinomycetales; f__Micrococcaceae; g__Rothia; s__Rothia_aeria	antibioticsYes	0.0478215	165	11	0.000354884	0.0106749	0.0342915	0.00015
22	antibiotics	k__Bacteria; p__Firmicutes; c__Clostridia; o__Clostridiales; f__Lachnospiraceae; g__Coprococcus; s__Coprococcus_catus	antibioticsYes	-0.258809	165	103	0.000412879	0.0119417	0.350316	0.337315
23	antibiotics	k__Bacteria; p__Firmicutes; c__Bacilli; o__Lactobacillales; f__Enterococcaceae; g__Enterococcus; s__Enterococcus_gallinarum	antibioticsYes	0.0277697	165	4	0.000517923	0.0144251	0.00275667	0.000197051
24	antibiotics	k__Bacteria; p__Actinobacteria; c__Actinobacteria; o__Bifidobacteriales; f__Bifidobacteriaceae; g__Scardovia; s__Scardovia_inopinata	antibioticsYes	0.0154381	165	4	0.000576413	0.0154808	0.000935172	0
25	antibiotics	k__Bacteria; p__Firmicutes; c__Clostridia; o__Clostridiales; f__Lachnospiraceae; g__Stomatobaculum; s__Stomatobaculum_longum	antibioticsYes	0.00755466	165	4	0.000683093	0.0177133	0.0812578	0
26	antibiotics	k__Bacteria; p__Firmicutes; c__Clostridia; o__Clostridiales; f__Ruminococcaceae; g__Subdoligranulum; s__Subdoligranulum_unclassified	antibioticsYes	-0.158858	165	162	0.000722096	0.0181006	2.38722	4.90492
27	antibiotics	k__Bacteria; p__Firmicutes; c__Clostridia; o__Clostridiales; f__Eubacteriaceae; g__Eubacterium; s__Eubacterium_ventriosum	antibioticsYes	-0.230769	165	100	0.00175366	0.036632	0.191953	0.340528
28	antibiotics	k__Bacteria; p__Firmicutes; c__Clostridia; o__Clostridiales; f__Lachnospiraceae; g__Lachnospiraceae_noname; s__Lachnospiraceae_bacterium_ICM7	antibioticsYes	0.025463	165	2	0.00199838	0.0398702	0.00301241	0
29	antibiotics	k__Bacteria; p__Actinobacteria; c__Actinobacteria; o__Actinomycetales; f__Propionibacteriaceae; g__Propionibacterium; s__Propionibacterium_acnes	antibioticsYes	0.0152861	165	2	0.00203664	0.0398702	0.00112276	0
30	antibiotics	k__Bacteria; p__Firmicutes; c__Bacilli; o__Lactobacillales; f__Aerococcaceae; g__Abiotrophia; s__Abiotrophia_defectiva	antibioticsYes	0.044844	165	29	0.00223397	0.0409743	0.061618	0.00266936
31	antibiotics	k__Bacteria; p__Actinobacteria; c__Actinobacteria; o__Coriobacteriales; f__Coriobacteriaceae; g__Slackia; s__Slackia_unclassified	antibioticsYes	0.0386404	165	20	0.00243136	0.0435329	0.00584897	0.00110372
32	antibiotics	k__Bacteria; p__Firmicutes; c__Clostridia; o__Clostridiales; f__Lachnospiraceae; g__Shuttleworthia; s__Shuttleworthia_satelles	antibioticsYes	0.0208749	165	4	0.00254113	0.0437017	0.00207943	5.0641e-05
33	antibiotics	k__Bacteria; p__Firmicutes; c__Clostridia; o__Clostridiales; f__Lachnospiraceae; g__Oribacterium; s__Oribacterium_sp_oral_taxon_078	antibioticsYes	0.0285464	165	2	0.00255702	0.0437017	0.00386747	0
34	antibiotics	k__Bacteria; p__Actinobacteria; c__Actinobacteria; o__Coriobacteriales; f__Coriobacteriaceae; g__Atopobium; s__Atopobium_rimae	antibioticsYes	0.0528982	165	25	0.00282097	0.0471416	0.0222016	0.00101179
36	cohort	k__Bacteria; p__Bacteroidetes; c__Bacteroidia; o__Bacteroidales; f__Porphyromonadaceae; g__Parabacteroides; s__Parabacteroides_unclassified	cohorthealthy	-0.191447	165	85	0.000123222	0.00545077	0.725606	0.108324
38	cohort	k__Bacteria; p__Proteobacteria; c__Betaproteobacteria; o__Burkholderiales; f__Sutterellaceae; g__Sutterella; s__Sutterella_wadsworthensis	cohorthealthy	-0.146285	165	43	0.000218587	0.0081088	0.244041	0.02902
41	cohort	k__Bacteria; p__Bacteroidetes; c__Bacteroidia; o__Bacteroidales; f__Bacteroidaceae; g__Bacteroides; s__Bacteroides_caccae	cohorthealthy	-0.134875	165	102	0.00124716	0.0284202	1.4578	0.413354
46	cohort	k__Bacteria; p__Bacteroidetes; c__Bacteroidia; o__Bacteroidales; f__Rikenellaceae; g__Alistipes; s__Alistipes_onderdonkii	cohorthealthy	-0.0928154	165	93	0.00301317	0.0492588	0.429189	0.212368
44	cohort	k__Bacteria; p__Firmicutes; c__Erysipelotrichia; o__Erysipelotrichales; f__Erysipelotrichaceae; g__Coprobacillus; s__Coprobacillus_unclassified	cohorthealthy	-0.04051	165	76	0.00206773	0.0398702	0.40129	0.0431405
42	cohort	k__Bacteria; p__Firmicutes; c__Bacilli; o__Bacillales; f__Staphylococcaceae; g__Staphylococcus; s__Staphylococcus_aureus	cohorthealthy	-0.0215879	165	14	0.00140495	0.0310742	0.0241489	0
40	cohort	k__Bacteria; p__Proteobacteria; c__Gammaproteobacteria; o__Enterobacteriales; f__Enterobacteriaceae; g__Citrobacter; s__Citrobacter_unclassified	cohorthealthy	0.036465	165	19	0.00103844	0.0244034	5.58621e-05	0.0364658
43	cohort	k__Bacteria; p__Proteobacteria; c__Gammaproteobacteria; o__Enterobacteriales; f__Enterobacteriaceae; g__Klebsiella; s__Klebsiella_pneumoniae	cohorthealthy	0.0512173	165	60	0.00152186	0.0326983	0.106095	0.910774
39	cohort	k__Bacteria; p__Firmicutes; c__Clostridia; o__Clostridiales; f__Ruminococcaceae; g__Subdoligranulum; s__Subdoligranulum_sp_4_3_54A2FAA	cohorthealthy	0.129295	165	23	0.000821624	0.019931	0.0369105	0.219152
35	cohort	k__Bacteria; p__Firmicutes; c__Clostridia; o__Clostridiales; f__Clostridiaceae; g__Clostridium; s__Clostridium_leptum	cohorthealthy	0.174826	165	96	8.40786e-07	0.000126454	0.0868953	0.481461
45	cohort	k__Bacteria; p__Firmicutes; c__Clostridia; o__Clostridiales; f__Lachnospiraceae; g__Dorea; s__Dorea_formicigenerans	cohorthealthy	0.177272	165	132	0.00217842	0.0409543	1.35449	1.53192
37	cohort	k__Bacteria; p__Actinobacteria; c__Actinobacteria; o__Coriobacteriales; f__Coriobacteriaceae; g__Adlercreutzia; s__Adlercreutzia_equolifaciens	cohorthealthy	0.181324	165	102	0.000201723	0.00798399	0.0833348	0.811514

## Sheet: Table S4
taxonomy	p value_SEVERITY	adjusted P value_SEVERITY	p value_antibiotics	adjusted p value_ANTIBIOTICS	mean non-COVID-19 (%)	mean mild (%)	mean moderate (%)	mean severe (%)	mean critical (%)	median non-COVID-19 (%)	median mild (%)	median moderate (%)	median severe (%)	median critical (%)
k__Bacteria; p__Firmicutes; c__Clostridia; o__Clostridiales; f__Ruminococcaceae; g__Faecalibacterium; s__Faecalibacterium_prausnitzii	0.0204843	0.167883	0.206357	0.207641	5.89453	5.38028	2.34303	0.0668225	0	4.24599	4.26157	1.06337	0.009585	0
k__Bacteria; p__Actinobacteria; c__Actinobacteria; o__Bifidobacteriales; f__Bifidobacteriaceae; g__Bifidobacterium; s__Bifidobacterium_bifidum	0.0420979	0.293906	0.020234	0.0496984	1.29831	1.79424	0.233812	0	0	0	0	0	0	0
k__Bacteria; p__Firmicutes; c__Clostridia; o__Clostridiales; f__Lachnospiraceae; g__Roseburia; s__Roseburia_inulinivorans	0.0373088	0.275793	0.134989	0.13668	0.881948	1.10481	0.980571	0	0.00136	0.364615	0.45211	0.15851	0	0
k__Bacteria; p__Firmicutes; c__Bacilli; o__Lactobacillales; f__Enterococcaceae; g__Enterococcus; s__Enterococcus_faecium	0.0123728	0.108478	0.0648068	0.0683289	0.639499	0.0102724	0.105277	0.052745	29.5738	0	0	0	0.037865	1.27778
k__Bacteria; p__Firmicutes; c__Clostridia; o__Clostridiales; f__Lachnospiraceae; g__Lachnospiraceae_noname; s__Lachnospiraceae_bacterium_1_1_57FAA	0.038933	0.280792	0.0409933	0.0498353	0.608054	0.565263	0.411353	0.012635	0	0.20414	0.25993	0.17883	0	0
k__Bacteria; p__Firmicutes; c__Clostridia; o__Clostridiales; f__Eubacteriaceae; g__Eubacterium; s__Eubacterium_eligens	0.00139503	0.0128275	0.0740629	0.0769176	0.366279	0.879928	0.672891	0.04221	0	0.014645	0.16301	0	0	0
k__Bacteria; p__Firmicutes; c__Clostridia; o__Clostridiales; f__Eubacteriaceae; g__Eubacterium; s__Eubacterium_ventriosum	0.0394747	0.280792	0.0946945	0.0968921	0.340528	0.192195	0.198015	0.00773	0	0.133105	0.03388	0	0	0
k__Bacteria; p__Firmicutes; c__Negativicutes; o__Selenomonadales; f__Veillonellaceae; g__Dialister; s__Dialister_succinatiphilus	0	0	0.0378618	0.0496984	0.123034	0.0204927	0	0	0	0	0	0	0	0
k__Bacteria; p__Bacteroidetes; c__Bacteroidia; o__Bacteroidales; f__Bacteroidales_noname; g__Bacteroidales_noname; s__Bacteroidales_bacterium_ph8	0.0194855	0.163245	0.0399622	0.0496984	0.102078	0.100942	0.05354	0	0.00023	0	0.01973	0	0	0
k__Bacteria; p__Proteobacteria; c__Betaproteobacteria; o__Burkholderiales; f__Sutterellaceae; g__Sutterella; s__Sutterella_wadsworthensis	0.0478448	0.327954	0.0470511	0.0542037	0.02902	0.402662	0.109165	0	0.000473333	0	0	0	0	0
k__Bacteria; p__Firmicutes; c__Clostridia; o__Clostridiales; f__Peptostreptococcaceae; g__Peptostreptococcaceae_noname; s__Clostridium_difficile	0	0	0.0337294	0.0496984	0.00921051	0.00463	0	0	0	0	0	0	0	0
k__Bacteria; p__Bacteroidetes; c__Bacteroidia; o__Bacteroidales; f__Prevotellaceae; g__Prevotella; s__Prevotella_timonensis	0	0	0.0362153	0.0496984	0.00560154	0.000425366	0	0	0	0	0	0	0	0
k__Bacteria; p__Firmicutes; c__Bacilli; o__Bacillales; f__Bacillales_noname; g__Gemella; s__Gemella_morbillorum	0.00775488	0.0696092	0.0523991	0.0578897	0.00350244	0.000332683	0.00159378	0.00086	0.00311	0	0	0	0	0
k__Bacteria; p__Bacteroidetes; c__Bacteroidia; o__Bacteroidales; f__Porphyromonadaceae; g__Porphyromonas; s__Porphyromonas_uenonis	0	0	0.0362153	0.0496984	0.00196231	5.02439e-05	0	0	0	0	0	0	0	0
k__Bacteria; p__Bacteroidetes; c__Bacteroidia; o__Bacteroidales; f__Porphyromonadaceae; g__Porphyromonas; s__Porphyromonas_asaccharolytica	0	0	0.0371566	0.0496984	0.00144846	0.00148366	0	0	0	0	0	0	0	0
k__Bacteria; p__Firmicutes; c__Bacilli; o__Lactobacillales; f__Lactobacillaceae; g__Lactobacillus; s__Lactobacillus_sakei	0	0	0.0546777	0.0596336	0.00130474	0.00143341	0	0	0	0	0	0	0	0
k__Bacteria; p__Firmicutes; c__Bacilli; o__Lactobacillales; f__Leuconostocaceae; g__Weissella; s__Weissella_unclassified	0	0	0.0218271	0.0496984	0.00101295	0.000597561	0	0	0	0	0	0	0	0
k__Bacteria; p__Firmicutes; c__Bacilli; o__Lactobacillales; f__Streptococcaceae; g__Streptococcus; s__Streptococcus_lutetiensis	0	0	0.0370039	0.0496984	0.00100603	0.000882683	0	0	0	0	0	0	0	0
k__Bacteria; p__Firmicutes; c__Clostridia; o__Clostridiales; f__Eubacteriaceae; g__Eubacterium; s__Eubacterium_brachy	0.0248904	0.195493	0.0270587	0.0496984	0.000945256	0.000532439	0.00286054	0.0065025	0.00100667	0	0	0	0	0
k__Bacteria; p__Firmicutes; c__Bacilli; o__Bacillales; f__Bacillales_noname; g__Gemella; s__Gemella_unclassified	0.0280432	0.215761	0.0305115	0.0496984	0.000902308	0.00036	0.000817027	0.0010775	0	0	0	0	0	0
k__Bacteria; p__Firmicutes; c__Clostridia; o__Clostridiales; f__Clostridiales_Family_XI_Incertae_Sedis; g__Peptoniphilus; s__Peptoniphilus_harei	0	0	0.040476	0.0496984	0.000791923	0.000168049	0	0	0	0	0	0	0	0
k__Bacteria; p__Proteobacteria; c__Epsilonproteobacteria; o__Campylobacterales; f__Campylobacteraceae; g__Campylobacter; s__Campylobacter_hominis	0	0	0.0241653	0.0496984	0.000367564	0.00119293	0	0	0	0	0	0	0	0
k__Bacteria; p__Firmicutes; c__Negativicutes; o__Selenomonadales; f__Veillonellaceae; g__Megasphaera; s__Megasphaera_elsdenii	0	0	0.0480404	0.0545898	0.000357949	0.0261205	0	0	0	0	0	0	0	0
k__Bacteria; p__Firmicutes; c__Bacilli; o__Lactobacillales; f__Streptococcaceae; g__Streptococcus; s__Streptococcus_sp_BS35b	0	0	0.0354507	0.0496984	0.000355	0.00136122	0	0	0	0	0	0	0	0
k__Bacteria; p__Firmicutes; c__Bacilli; o__Lactobacillales; f__Lactobacillaceae; g__Lactobacillus; s__Lactobacillus_crispatus	0	0	0.0354507	0.0496984	0.000287179	0.000219024	0	0	0	0	0	0	0	0
k__Bacteria; p__Bacteroidetes; c__Bacteroidia; o__Bacteroidales; f__Prevotellaceae; g__Prevotella; s__Prevotella_disiens	0	0	0.027157	0.0496984	0.000251154	0.000442195	0	0	0	0	0	0	0	0
k__Bacteria; p__Actinobacteria; c__Actinobacteria; o__Actinomycetales; f__Actinomycetaceae; g__Mobiluncus; s__Mobiluncus_unclassified	0	0	0.0389724	0.0496984	0.000191154	0.000173902	0	0	0	0	0	0	0	0
k__Bacteria; p__Firmicutes; c__Erysipelotrichia; o__Erysipelotrichales; f__Erysipelotrichaceae; g__Bulleidia; s__Bulleidia_extructa	0.0216416	0.173594	0.0190328	0.0496984	0.000125256	4.7561e-05	0.000115135	0.0007475	0.00929667	0	0	0	0	0
k__Bacteria; p__Firmicutes; c__Clostridia; o__Clostridiales; f__Clostridiales_Family_XI_Incertae_Sedis; g__Anaerococcus; s__Anaerococcus_vaginalis	0	0	0.028675	0.0496984	0.000107436	0.0100602	0	0	0	0	0	0	0	0
k__Bacteria; p__Actinobacteria; c__Actinobacteria; o__Actinomycetales; f__Actinomycetaceae; g__Actinomyces; s__Actinomyces_timonensis	0.0164081	0.140588	0.0977956	0.0998544	9.48718e-05	0	0.000540541	0	0.00451	0	0	0	0	0
k__Bacteria; p__Bacteroidetes; c__Bacteroidia; o__Bacteroidales; f__Porphyromonadaceae; g__Porphyromonas; s__Porphyromonas_somerae	0	0	0.0371566	0.0496984	8.37179e-05	0.000704146	0	0	0	0	0	0	0	0
k__Bacteria; p__Firmicutes; c__Clostridia; o__Clostridiales; f__Clostridiales_Family_XI_Incertae_Sedis; g__Clostridiales_Family_XI_Incertae_Sedis_noname; s__Clostridiales_bacterium_BV3C26	0	0	0.0371566	0.0496984	8.21795e-05	0.000576098	0	0	0	0	0	0	0	0
k__Bacteria; p__Proteobacteria; c__Gammaproteobacteria; o__Enterobacteriales; f__Enterobacteriaceae; g__Shigella; s__Shigella_flexneri	0	0	0.0347204	0.0496984	6.62821e-05	0.000166098	0	0	0	0	0	0	0	0
k__Bacteria; p__Proteobacteria; c__Gammaproteobacteria; o__Pasteurellales; f__Pasteurellaceae; g__Haemophilus; s__Haemophilus_pittmaniae	0	0	0.0347204	0.0496984	6.37179e-05	5.53659e-05	0	0	0	0	0	0	0	0
k__Bacteria; p__Firmicutes; c__Clostridia; o__Clostridiales; f__Ruminococcaceae; g__Ruminococcus; s__Ruminococcus_albus	0	0	0.0348761	0.0496984	1.21795e-05	1.17073e-05	0	0	0	0	0	0	0	0
k__Bacteria; p__Firmicutes; c__Clostridia; o__Clostridiales; f__Clostridiales_Family_XI_Incertae_Sedis; g__Anaerococcus; s__Anaerococcus_obesiensis	0	0	0.0383253	0.0496984	7.82051e-06	0.0122781	0	0	0	0	0	0	0	0
k__Bacteria; p__Actinobacteria; c__Actinobacteria; o__Actinomycetales; f__Corynebacteriaceae; g__Corynebacterium; s__Corynebacterium_amycolatum	0	0	0.0354507	0.0496984	0	0.000109756	0	0	0	0	0	0	0	0
k__Bacteria; p__Actinobacteria; c__Actinobacteria; o__Actinomycetales; f__Corynebacteriaceae; g__Corynebacterium; s__Corynebacterium_propinquum	0	0	0.0413068	0.0498353	0	0	0	0	0.00880667	0	0	0	0	0
k__Bacteria; p__Actinobacteria; c__Actinobacteria; o__Actinomycetales; f__Corynebacteriaceae; g__Corynebacterium; s__Corynebacterium_pseudodiphtheriticum	0	0	0.0347204	0.0496984	0	0.000241463	0	0	0	0	0	0	0	0
k__Bacteria; p__Bacteroidetes; c__Bacteroidia; o__Bacteroidales; f__Bacteroidaceae; g__Bacteroides; s__Bacteroides_oleiciplenus	0	0	0.0212823	0.0496984	0	0.000359512	0	0	0	0	0	0	0	0
k__Bacteria; p__Firmicutes; c__Bacilli; o__Bacillales; f__Bacillaceae; g__Geobacillus; s__Geobacillus_unclassified	0	0	0.0348761	0.0496984	0	0.000206585	0	0	0	0	0	0	0	0
k__Bacteria; p__Firmicutes; c__Bacilli; o__Lactobacillales; f__Lactobacillaceae; g__Lactobacillus; s__Lactobacillus_acidophilus	0	0	0.0210955	0.0496984	0	0.000944634	0	0	0	0	0	0	0	0
k__Bacteria; p__Firmicutes; c__Bacilli; o__Lactobacillales; f__Lactobacillaceae; g__Lactobacillus; s__Lactobacillus_amylovorus	0	0	0.0400498	0.0496984	0	8.58537e-05	0	0	0	0	0	0	0	0
k__Bacteria; p__Firmicutes; c__Bacilli; o__Lactobacillales; f__Lactobacillaceae; g__Lactobacillus; s__Lactobacillus_brevis	0	0	0.0546777	0.0596336	0	5.82927e-05	0	0	0	0	0	0	0	0
k__Bacteria; p__Firmicutes; c__Bacilli; o__Lactobacillales; f__Lactobacillaceae; g__Lactobacillus; s__Lactobacillus_gastricus	0	0	0.0546777	0.0596336	0	0.000820244	0	0	0	0	0	0	0	0
k__Bacteria; p__Firmicutes; c__Clostridia; o__Clostridiales; f__Clostridiaceae; g__Butyricicoccus; s__Butyricicoccus_pullicaecorum	0	0	0.03685	0.0496984	0	0.000467317	0	0	0	0	0	0	0	0
k__Bacteria; p__Firmicutes; c__Clostridia; o__Clostridiales; f__Clostridiaceae; g__Clostridium; s__Clostridium_butyricum	0	0	0.0337294	0.0496984	0	4.95122e-05	0	0	0	0	0	0	0	0
k__Bacteria; p__Firmicutes; c__Clostridia; o__Clostridiales; f__Clostridiales_Family_XI_Incertae_Sedis; g__Peptoniphilus; s__Peptoniphilus_duerdenii	0	0	0.0371566	0.0496984	0	0.00013	0	0	0	0	0	0	0	0
k__Bacteria; p__Firmicutes; c__Clostridia; o__Clostridiales; f__Lachnospiraceae; g__Blautia; s__Blautia_hansenii	0	0	0.0348761	0.0496984	0	3.34146e-05	0	0	0	0	0	0	0	0
k__Bacteria; p__Firmicutes; c__Clostridia; o__Clostridiales; f__Peptostreptococcaceae; g__Peptostreptococcaceae_noname; s__Clostridium_hiranonis	0.0303944	0.229174	0.0216155	0.0496984	0	0	0.364006	0	0	0	0	0	0	0
k__Bacteria; p__Firmicutes; c__Erysipelotrichia; o__Erysipelotrichales; f__Erysipelotrichaceae; g__Holdemania; s__Holdemania_sp_AP2	0	0	0.0207984	0.0496984	0	0.00487878	0	0	0	0	0	0	0	0
k__Bacteria; p__Fusobacteria; c__Fusobacteriia; o__Fusobacteriales; f__Fusobacteriaceae; g__Fusobacterium; s__Fusobacterium_gonidiaformans	0	0	0.0371566	0.0496984	0	0.0571573	0	0	0	0	0	0	0	0
k__Bacteria; p__Proteobacteria; c__Epsilonproteobacteria; o__Campylobacterales; f__Campylobacteraceae; g__Campylobacter; s__Campylobacter_jejuni	0	0	0.0347204	0.0496984	0	1.56098e-05	0	0	0	0	0	0	0	0
k__Bacteria; p__Proteobacteria; c__Gammaproteobacteria; o__Enterobacteriales; f__Enterobacteriaceae; g__Citrobacter; s__Citrobacter_koseri	0	0	0.0400498	0.0496984	0	0.000834634	0	0	0	0	0	0	0	0
k__Bacteria; p__Synergistetes; c__Synergistia; o__Synergistales; f__Synergistaceae; g__Synergistes; s__Synergistes_sp_3_1_syn1	0	0	0.0413068	0.0498353	0	0	0	0	0.57695	0	0	0	0	0
k__Bacteria; p__Actinobacteria; c__Actinobacteria; o__Bifidobacteriales; f__Bifidobacteriaceae; g__Bifidobacterium; s__Bifidobacterium_adolescentis	0.376554	0.811205	0.0625166	0.0662021	7.77823	5.46824	3.05255	0.01359	1.1206	2.69707	2.26582	0	0	0
k__Bacteria; p__Firmicutes; c__Clostridia; o__Clostridiales; f__Eubacteriaceae; g__Eubacterium; s__Eubacterium_rectale	0.1851	0.673683	0.108498	0.11055	6.78317	4.15549	2.61839	0.0007725	0	3.44849	1.6964	0.00152	0	0
k__Bacteria; p__Actinobacteria; c__Actinobacteria; o__Bifidobacteriales; f__Bifidobacteriaceae; g__Bifidobacterium; s__Bifidobacterium_longum	0.830927	0.990549	0.0378864	0.0496984	5.82445	7.34088	5.63893	1.44663	5.27309	2.71476	5.16257	1.46469	0	6.22792
k__Bacteria; p__Firmicutes; c__Clostridia; o__Clostridiales; f__Ruminococcaceae; g__Ruminococcus; s__Ruminococcus_bromii	0.563175	0.872651	0.0341581	0.0496984	5.72658	2.54162	2.17814	0	0.280883	0.00381	0	0	0	0
k__Bacteria; p__Firmicutes; c__Clostridia; o__Clostridiales; f__Ruminococcaceae; g__Subdoligranulum; s__Subdoligranulum_unclassified	0.235008	0.726214	0.056151	0.0606531	4.90492	2.52584	2.08463	5.07442	0.98687	3.27735	1.17251	1.02937	1.92333	0.33814
k__Bacteria; p__Actinobacteria; c__Actinobacteria; o__Coriobacteriales; f__Coriobacteriaceae; g__Collinsella; s__Collinsella_aerofaciens	0.280103	0.770794	0.0547154	0.0596336	4.49499	2.90468	2.20822	4.24278	0.0338167	2.84213	2.37408	0.20354	4.14013	0
k__Bacteria; p__Firmicutes; c__Clostridia; o__Clostridiales; f__Ruminococcaceae; g__Ruminococcus; s__Ruminococcus_sp_5_1_39BFAA	0.872639	0.990549	0.0355234	0.0496984	3.90298	5.29098	4.97051	5.50877	0	2.65403	3.19203	2.78127	0.926455	0
k__Bacteria; p__Actinobacteria; c__Actinobacteria; o__Bifidobacteriales; f__Bifidobacteriaceae; g__Bifidobacterium; s__Bifidobacterium_pseudocatenulatum	0.959829	0.990549	0.0343981	0.0496984	3.82796	1.40226	2.47792	0.0405525	0.0113267	0.523305	0.13371	0.006	0	0
k__Bacteria; p__Firmicutes; c__Clostridia; o__Clostridiales; f__Lachnospiraceae; g__Blautia; s__Ruminococcus_obeum	0.472945	0.849477	0.0710801	0.0741373	2.39657	1.47963	2.23999	0.471693	0.03881	1.39912	1.02083	0.96973	0.29737	0.01495
k__Bacteria; p__Proteobacteria; c__Gammaproteobacteria; o__Enterobacteriales; f__Enterobacteriaceae; g__Escherichia; s__Escherichia_coli	0.205328	0.70073	0.0321614	0.0496984	2.3591	1.46283	1.16909	1.2788	0.876733	0.45769	0.43057	0.20697	0.00219	0.58497
k__Bacteria; p__Firmicutes; c__Clostridia; o__Clostridiales; f__Lachnospiraceae; g__Blautia; s__Ruminococcus_torques	0.24044	0.736959	0.055649	0.060245	2.2706	3.79837	5.04371	5.0059	4.72784	1.17949	3.07411	2.08729	2.82895	0.06166
k__Bacteria; p__Bacteroidetes; c__Bacteroidia; o__Bacteroidales; f__Prevotellaceae; g__Prevotella; s__Prevotella_copri	NA	NA	NA	NA	1.98597	0.368933	1.89086	0	0	0	0	0	0	0
k__Bacteria; p__Firmicutes; c__Clostridia; o__Clostridiales; f__Lachnospiraceae; g__Blautia; s__Ruminococcus_gnavus	0.849584	0.990549	0.0333706	0.0496984	1.82338	4.6882	3.96031	5.34497	12.4044	0.21336	0.56218	2.58483	0.79015	0.33787
k__Bacteria; p__Firmicutes; c__Clostridia; o__Clostridiales; f__Lachnospiraceae; g__Dorea; s__Dorea_formicigenerans	0.0978308	0.53357	0.151354	0.152931	1.53192	1.46308	1.43801	0.187365	0.00888667	1.26941	1.01578	0.8625	0	0
k__Bacteria; p__Firmicutes; c__Clostridia; o__Clostridiales; f__Lachnospiraceae; g__Dorea; s__Dorea_longicatena	0.111006	0.550913	0.222064	0.222983	1.50229	1.5308	0.810479	0.0675475	0.02147	0.656785	0.62502	0.27869	0	0
k__Bacteria; p__Firmicutes; c__Clostridia; o__Clostridiales; f__Lachnospiraceae; g__Coprococcus; s__Coprococcus_comes	0.59056	0.881274	0.11427	0.116186	1.36521	1.28643	0.894454	0.0025775	0	0.99821	0.85901	0.26461	0	0
k__Bacteria; p__Firmicutes; c__Bacilli; o__Lactobacillales; f__Streptococcaceae; g__Streptococcus; s__Streptococcus_salivarius	0.071355	0.426998	0.122614	0.12441	1.26606	1.76228	0.806353	0.041035	1.47072	0.39101	0.71145	0.22098	0.02834	0
k__Bacteria; p__Bacteroidetes; c__Bacteroidia; o__Bacteroidales; f__Rikenellaceae; g__Alistipes; s__Alistipes_putredinis	0.33604	0.811205	0.0249155	0.0496984	1.18929	1.07604	0.825762	1.01802	0.00423	0.212375	0.76747	0	0	0
k__Bacteria; p__Bacteroidetes; c__Bacteroidia; o__Bacteroidales; f__Bacteroidaceae; g__Bacteroides; s__Bacteroides_uniformis	0.539905	0.864957	0.035472	0.0496984	1.17008	1.37229	1.47833	3.23872	0.928117	0.406335	0.69413	0.21406	0.979925	0.01349
k__Bacteria; p__Bacteroidetes; c__Bacteroidia; o__Bacteroidales; f__Bacteroidaceae; g__Bacteroides; s__Bacteroides_vulgatus	0.503696	0.849477	0.0343377	0.0496984	1.1353	2.73818	3.40422	0.703035	0.1237	0.11292	0.72361	0.4314	0.707405	0.0392
k__Bacteria; p__Firmicutes; c__Clostridia; o__Clostridiales; f__Eubacteriaceae; g__Eubacterium; s__Eubacterium_hallii	0.0558248	0.365842	0.155669	0.156963	1.07739	1.53994	0.972686	0.55781	0.00611667	0.78298	0.80128	0.48605	0.031525	0
k__Bacteria; p__Firmicutes; c__Negativicutes; o__Selenomonadales; f__Veillonellaceae; g__Megamonas; s__Megamonas_unclassified	NA	NA	NA	NA	1.05588	0.368842	1.36267	0	0	0	0	0	0	0
k__Bacteria; p__Bacteroidetes; c__Bacteroidia; o__Bacteroidales; f__Bacteroidaceae; g__Bacteroides; s__Bacteroides_stercoris	0.800474	0.990549	0.0360399	0.0496984	1.03853	2.06116	1.55494	0.1788	0.0521367	0.010615	0.00568	0.00237	0.015335	0
k__Bacteria; p__Firmicutes; c__Clostridia; o__Clostridiales; f__Lachnospiraceae; g__Coprococcus; s__Coprococcus_sp_ART55_1	0.883661	0.990549	0.0369179	0.0496984	0.919311	0.427309	0.600975	0	0	0	0	0	0	0
k__Bacteria; p__Proteobacteria; c__Gammaproteobacteria; o__Enterobacteriales; f__Enterobacteriaceae; g__Klebsiella; s__Klebsiella_pneumoniae	0.141439	0.595464	0.0271727	0.0496984	0.910774	0.098221	0.140626	0	0	0.0016	0	0	0	0
k__Bacteria; p__Proteobacteria; c__Gammaproteobacteria; o__Enterobacteriales; f__Enterobacteriaceae; g__Escherichia; s__Escherichia_unclassified	0.509328	0.849477	0.029019	0.0496984	0.874287	0.549713	0.63853	0.0168225	0.661073	0.1649	0.06912	0.18683	0.014985	0.29365
k__Bacteria; p__Firmicutes; c__Clostridia; o__Clostridiales; f__Ruminococcaceae; g__Ruminococcus; s__Ruminococcus_lactaris	NA	NA	NA	NA	0.858357	0.437383	0.645166	0	0	0	0	0	0	0
k__Bacteria; p__Actinobacteria; c__Actinobacteria; o__Coriobacteriales; f__Coriobacteriaceae; g__Adlercreutzia; s__Adlercreutzia_equolifaciens	0.376482	0.811205	0.0603023	0.0642783	0.811514	0.111478	0.0601497	0.0002925	0.0354833	0.362525	0.02077	0	0	0
k__Bacteria; p__Verrucomicrobia; c__Verrucomicrobiae; o__Verrucomicrobiales; f__Verrucomicrobiaceae; g__Akkermansia; s__Akkermansia_muciniphila	0.403063	0.821377	0.0500178	0.0561543	0.772822	0.54211	0.948196	0	11.6433	0	0	0	0	0
k__Bacteria; p__Bacteroidetes; c__Bacteroidia; o__Bacteroidales; f__Bacteroidaceae; g__Bacteroides; s__Bacteroides_dorei	0.136778	0.593027	0.0583092	0.0622907	0.737729	3.70773	2.44856	5.19979	0.0113767	0.002815	0.43142	0	4.29206	0.01528
k__Bacteria; p__Actinobacteria; c__Actinobacteria; o__Coriobacteriales; f__Coriobacteriaceae; g__Collinsella; s__Collinsella_tanakaei	NA	NA	NA	NA	0.717676	0.405517	0.292268	0	0	0	0	0	0	0
k__Bacteria; p__Bacteroidetes; c__Bacteroidia; o__Bacteroidales; f__Bacteroidaceae; g__Bacteroides; s__Bacteroides_ovatus	0.217175	0.718202	0.0192467	0.0496984	0.61563	1.5602	2.56376	1.81929	0.02887	0.133185	0.45712	0.31739	0.01968	0.00592
k__Bacteria; p__Actinobacteria; c__Actinobacteria; o__Coriobacteriales; f__Coriobacteriaceae; g__Eggerthella; s__Eggerthella_unclassified	0.52061	0.849477	0.032893	0.0496984	0.604164	0.446064	1.02824	0.706708	2.71736	0.227045	0.26116	0.25206	0.464925	0.02932
k__Bacteria; p__Firmicutes; c__Negativicutes; o__Selenomonadales; f__Veillonellaceae; g__Megasphaera; s__Megasphaera_unclassified	0.99639	0.99639	0.0339667	0.0496984	0.548377	0.182189	0.230029	0.109135	0	0	0	0	0	0
k__Bacteria; p__Firmicutes; c__Clostridia; o__Clostridiales; f__Clostridiaceae; g__Clostridium; s__Clostridium_leptum	0.122863	0.571843	0.0333446	0.0496984	0.481461	0.101004	0.0793619	0	0.0902833	0.096715	0	0	0	0
k__Bacteria; p__Proteobacteria; c__Deltaproteobacteria; o__Desulfovibrionales; f__Desulfovibrionaceae; g__Bilophila; s__Bilophila_unclassified	0.953269	0.990549	0.0337052	0.0496984	0.479871	0.386651	0.586668	0.459933	0.21482	0.24954	0.22201	0.2725	0.12212	0.09933
k__Bacteria; p__Bacteroidetes; c__Bacteroidia; o__Bacteroidales; f__Bacteroidaceae; g__Bacteroides; s__Bacteroides_eggerthii	NA	NA	NA	NA	0.461203	0.0154029	0.145347	0	0	0	0	0	0	0
k__Bacteria; p__Bacteroidetes; c__Bacteroidia; o__Bacteroidales; f__Bacteroidaceae; g__Bacteroides; s__Bacteroides_thetaiotaomicron	0.976661	0.990549	0.0347945	0.0496984	0.432059	0.847668	1.02972	4.49804	0.642727	0.161595	0.35593	0.21611	2.09935	0.3045
k__Bacteria; p__Firmicutes; c__Clostridia; o__Clostridiales; f__Lachnospiraceae; g__Roseburia; s__Roseburia_intestinalis	NA	NA	NA	NA	0.424068	0.35409	0.256169	0	0	0.014145	0	0	0	0
k__Bacteria; p__Bacteroidetes; c__Bacteroidia; o__Bacteroidales; f__Bacteroidaceae; g__Bacteroides; s__Bacteroides_caccae	0.43779	0.849477	0.0569839	0.061416	0.413354	1.85618	1.10266	2.23632	0	0.02278	0.20105	0.0902	0.00043	0
k__Bacteria; p__Firmicutes; c__Erysipelotrichia; o__Erysipelotrichales; f__Erysipelotrichaceae; g__Erysipelotrichaceae_noname; s__Eubacterium_biforme	NA	NA	NA	NA	0.38793	1.51998	0.83692	0	0	0	0	0	0	0
k__Bacteria; p__Firmicutes; c__Negativicutes; o__Selenomonadales; f__Acidaminococcaceae; g__Phascolarctobacterium; s__Phascolarctobacterium_succinatutens	NA	NA	NA	NA	0.345295	0.0249968	0.299958	0	0	0	0	0	0	0
k__Bacteria; p__Firmicutes; c__Clostridia; o__Clostridiales; f__Oscillospiraceae; g__Oscillibacter; s__Oscillibacter_unclassified	0.373039	0.811205	0.0401223	0.0496984	0.344431	0.232083	0.339221	0.553573	0.31618	0.088085	0.0832	0.08589	0.452955	0.2063
k__Bacteria; p__Bacteroidetes; c__Bacteroidia; o__Bacteroidales; f__Bacteroidaceae; g__Bacteroides; s__Bacteroides_fragilis	0.173274	0.653242	0.0335204	0.0496984	0.340451	1.17152	0.535816	2.92368	0.13514	0.00523	0.40602	0	0	0
k__Bacteria; p__Firmicutes; c__Clostridia; o__Clostridiales; f__Lachnospiraceae; g__Coprococcus; s__Coprococcus_catus	0.590616	0.881274	0.0616514	0.0654287	0.337315	0.306528	0.480676	0.031205	0	0.186525	0.30409	0.09799	0.023655	0
k__Bacteria; p__Firmicutes; c__Clostridia; o__Clostridiales; f__Clostridiaceae; g__Clostridium; s__Clostridium_nexile	0.0660074	0.407947	0.026395	0.0496984	0.331405	0.739811	0.288575	0.0021575	0	0	0	0	0	0
k__Bacteria; p__Bacteroidetes; c__Bacteroidia; o__Bacteroidales; f__Bacteroidaceae; g__Bacteroides; s__Bacteroides_coprocola	NA	NA	NA	NA	0.323865	0.679438	0.293243	0	0	0	0	0	0	0
k__Bacteria; p__Firmicutes; c__Clostridia; o__Clostridiales; f__Lachnospiraceae; g__Roseburia; s__Roseburia_hominis	0.733861	0.970327	0.0520255	0.0577399	0.304712	0.198211	0.125485	0.0018575	0	0.061305	0.00376	0	0	0
k__Bacteria; p__Firmicutes; c__Clostridia; o__Clostridiales; f__Lachnospiraceae; g__Lachnospiraceae_noname; s__Lachnospiraceae_bacterium_5_1_63FAA	0.199207	0.689001	0.253422	0.253945	0.277694	0.334494	0.2731	0.0201125	0	0.092065	0.12946	0.03631	0.0051	0
k__Bacteria; p__Firmicutes; c__Negativicutes; o__Selenomonadales; f__Veillonellaceae; g__Megamonas; s__Megamonas_hypermegale	NA	NA	NA	NA	0.276286	0.0674537	0.0971795	0	0	0	0	0	0	0
k__Bacteria; p__Bacteroidetes; c__Bacteroidia; o__Bacteroidales; f__Porphyromonadaceae; g__Parabacteroides; s__Parabacteroides_merdae	0.910226	0.990549	0.0345846	0.0496984	0.266652	0.536314	1.80887	0.0075825	0.0388533	0.01121	0.05537	0.02402	0.00846	0.00338
k__Archaea; p__Euryarchaeota; c__Methanobacteria; o__Methanobacteriales; f__Methanobacteriaceae; g__Methanobrevibacter; s__Methanobrevibacter_smithii	0.359722	0.811205	0.0663654	0.0696693	0.2603	0.0593966	0.0933808	0	0	0	0	0	0	0
k__Bacteria; p__Firmicutes; c__Negativicutes; o__Selenomonadales; f__Acidaminococcaceae; g__Acidaminococcus; s__Acidaminococcus_unclassified	NA	NA	NA	NA	0.246807	0.22604	0.157195	0	0	0	0	0	0	0
k__Bacteria; p__Firmicutes; c__Clostridia; o__Clostridiales; f__Eubacteriaceae; g__Eubacterium; s__Eubacterium_ramulus	NA	NA	NA	NA	0.242591	0.333213	0.450162	0	0	0.067465	0.12303	0.00709	0	0
k__Bacteria; p__Bacteroidetes; c__Bacteroidia; o__Bacteroidales; f__Bacteroidaceae; g__Bacteroides; s__Bacteroides_plebeius	NA	NA	NA	NA	0.236537	0.284224	0.201506	0	0	0	0	0	0	0
k__Bacteria; p__Firmicutes; c__Bacilli; o__Lactobacillales; f__Enterococcaceae; g__Enterococcus; s__Enterococcus_avium	0.928539	0.990549	0.0397678	0.0496984	0.231709	0.00656146	0.082794	0	1.02055	0	0	0	0	0.06153
k__Bacteria; p__Bacteroidetes; c__Bacteroidia; o__Bacteroidales; f__Porphyromonadaceae; g__Barnesiella; s__Barnesiella_intestinihominis	0.323236	0.811205	0.0511804	0.0569323	0.223519	0.378596	0.419404	0.008305	0.0276667	0	0.04728	0	0	0
k__Bacteria; p__Firmicutes; c__Bacilli; o__Lactobacillales; f__Streptococcaceae; g__Streptococcus; s__Streptococcus_parasanguinis	0.6229	0.900162	0.0344167	0.0496984	0.221031	0.564444	1.26192	0.0390575	0.847783	0.05743	0.09253	0.19552	0.01113	0
k__Bacteria; p__Firmicutes; c__Clostridia; o__Clostridiales; f__Ruminococcaceae; g__Subdoligranulum; s__Subdoligranulum_sp_4_3_54A2FAA	0.215504	0.718202	0.0306639	0.0496984	0.219152	0.0623056	0.0177481	0	0	0	0	0	0	0
k__Bacteria; p__Bacteroidetes; c__Bacteroidia; o__Bacteroidales; f__Rikenellaceae; g__Alistipes; s__Alistipes_onderdonkii	0.357875	0.811205	0.027863	0.0496984	0.212368	0.32096	0.606693	0.341855	0.00169	0.002685	0.03366	0.04956	0.0762	0
k__Bacteria; p__Firmicutes; c__Bacilli; o__Lactobacillales; f__Enterococcaceae; g__Enterococcus; s__Enterococcus_faecalis	0.265395	0.766359	0.0255765	0.0496984	0.205377	0.0240232	0.0252065	0.063215	0	0	0	0	0	0
k__Bacteria; p__Firmicutes; c__Clostridia; o__Clostridiales; f__Eubacteriaceae; g__Eubacterium; s__Eubacterium_siraeum	NA	NA	NA	NA	0.189165	0.263739	0.296588	0	0	0	0	0	0	0
k__Bacteria; p__Bacteroidetes; c__Bacteroidia; o__Bacteroidales; f__Bacteroidaceae; g__Bacteroides; s__Bacteroides_cellulosilyticus	0.388834	0.818925	0.0400865	0.0496984	0.185288	0.277879	0.225038	0	0.0389467	0.01043	0.01536	0	0	0.00158
k__Bacteria; p__Bacteroidetes; c__Bacteroidia; o__Bacteroidales; f__Prevotellaceae; g__Prevotella; s__Prevotella_stercorea	0.724537	0.968619	0.0415611	0.0499396	0.181002	0.0414081	0.140493	0	0	0	0	0	0	0
k__Bacteria; p__Bacteroidetes; c__Bacteroidia; o__Bacteroidales; f__Rikenellaceae; g__Alistipes; s__Alistipes_shahii	0.226535	0.72376	0.0290151	0.0496984	0.178098	0.286144	0.122946	0.221535	0.0760467	0.03143	0.04446	0.00719	0.011495	0
k__Bacteria; p__Bacteroidetes; c__Bacteroidia; o__Bacteroidales; f__Bacteroidaceae; g__Bacteroides; s__Bacteroides_massiliensis	0.163687	0.642811	0.0321495	0.0496984	0.177567	0.326959	1.30278	2.27104	0.0273833	0	0	0.10524	0	0
k__Bacteria; p__Bacteroidetes; c__Bacteroidia; o__Bacteroidales; f__Porphyromonadaceae; g__Parabacteroides; s__Parabacteroides_distasonis	0.0652267	0.407947	0.0284045	0.0496984	0.172927	0.263704	1.23293	0.688455	1.47296	0.030285	0.05281	0.14774	0.657795	0.75121
k__Bacteria; p__Firmicutes; c__Clostridia; o__Clostridiales; f__Lachnospiraceae; g__Lachnospiraceae_noname; s__Lachnospiraceae_bacterium_2_1_58FAA	0.0562834	0.365842	0.0159884	0.0496984	0.15165	0.0894346	0.290443	0.619335	0.314833	0.00218	0.00669	0.0431	0.40211	0.0641
k__Bacteria; p__Firmicutes; c__Clostridia; o__Clostridiales; f__Clostridiaceae; g__Clostridium; s__Clostridium_sp_L2_50	0.978848	0.990549	0.0546778	0.0596336	0.151242	0.0633295	0	0	0	0	0	0	0	0
k__Bacteria; p__Firmicutes; c__Erysipelotrichia; o__Erysipelotrichales; f__Erysipelotrichaceae; g__Catenibacterium; s__Catenibacterium_mitsuokai	0.525008	0.849477	0.0454751	0.0526382	0.142771	0.247032	0.15837	0.18806	0	0	0	0	0	0
k__Bacteria; p__Actinobacteria; c__Actinobacteria; o__Coriobacteriales; f__Coriobacteriaceae; g__Coriobacteriaceae_noname; s__Coriobacteriaceae_bacterium_phI	0.32556	0.811205	0.0279713	0.0496984	0.13668	0.0127417	0.00440676	0	0	0	0	0	0	0
k__Bacteria; p__Actinobacteria; c__Actinobacteria; o__Coriobacteriales; f__Coriobacteriaceae; g__Gordonibacter; s__Gordonibacter_pamelaeae	0.905349	0.990549	0.0344702	0.0496984	0.133676	0.0492234	0.0664349	0	0.00587	0.012735	0.00175	0	0	0.00311
k__Bacteria; p__Firmicutes; c__Clostridia; o__Clostridiales; f__Ruminococcaceae; g__Ruminococcus; s__Ruminococcus_callidus	0.797484	0.990549	0.0374935	0.0496984	0.125381	0.297384	0.332718	0	0	0.002195	0	0	0	0
k__Bacteria; p__Bacteroidetes; c__Bacteroidia; o__Bacteroidales; f__Rikenellaceae; g__Alistipes; s__Alistipes_indistinctus	0.110737	0.550913	0.0522324	0.0578373	0.11522	0.0405215	0.0593362	0.334027	0.20592	0.00265	0	0	0.031335	0.19492
k__Bacteria; p__Bacteroidetes; c__Bacteroidia; o__Bacteroidales; f__Porphyromonadaceae; g__Parabacteroides; s__Parabacteroides_unclassified	0.755619	0.978929	0.0431187	0.0511421	0.108324	0.638141	0.51542	3.11772	1.78823	0	0.07897	0.01983	2.10556	0.5473
k__Bacteria; p__Firmicutes; c__Clostridia; o__Clostridiales; f__Lachnospiraceae; g__Lachnospiraceae_noname; s__Lachnospiraceae_bacterium_1_4_56FAA	0.340975	0.811205	0.0287709	0.0496984	0.107337	0.0675942	0.213571	0	0.04481	0	0.00505	0.00809	0	0
k__Bacteria; p__Actinobacteria; c__Actinobacteria; o__Coriobacteriales; f__Coriobacteriaceae; g__Collinsella; s__Collinsella_intestinalis	0.352608	0.811205	0.0278797	0.0496984	0.0985114	0.0306944	0.015237	0	0.259383	0	0	0	0	0
k__Bacteria; p__Bacteroidetes; c__Bacteroidia; o__Bacteroidales; f__Prevotellaceae; g__Paraprevotella; s__Paraprevotella_unclassified	0.842269	0.990549	0.033265	0.0496984	0.0976837	0.105538	0.162195	2.3073	0	0	0	0	0	0
k__Bacteria; p__Actinobacteria; c__Actinobacteria; o__Coriobacteriales; f__Coriobacteriaceae; g__Slackia; s__Slackia_piriformis	0.397515	0.818925	0.035031	0.0496984	0.0967638	0.0122961	0.0996819	0	0	0	0	0	0	0
k__Bacteria; p__Firmicutes; c__Negativicutes; o__Selenomonadales; f__Veillonellaceae; g__Dialister; s__Dialister_invisus	0.913835	0.990549	0.0354334	0.0496984	0.0956739	0	0.0400038	0	0	0	0	0	0	0
k__Bacteria; p__Firmicutes; c__Clostridia; o__Clostridiales; f__Lachnospiraceae; g__Coprococcus; s__Coprococcus_eutactus	0.2301	0.725139	0.0300464	0.0496984	0.0956135	0.01471	0.0282073	0	0	0	0	0	0	0
k__Bacteria; p__Firmicutes; c__Clostridia; o__Clostridiales; f__Peptostreptococcaceae; g__Peptostreptococcaceae_noname; s__Peptostreptococcaceae_noname_unclassified	0.477881	0.849477	0.0333822	0.0496984	0.0946313	0.0220388	0.0247113	0	0.00275333	0.009295	0	0	0	0
k__Bacteria; p__Firmicutes; c__Clostridia; o__Clostridiales; f__Clostridiaceae; g__Clostridium; s__Clostridium_hathewayi	0.374133	0.811205	0.0269654	0.0496984	0.0922435	0.0842839	0.077467	0.182035	9.20229	0	0.00735	0.01033	0	1.25916
k__Bacteria; p__Firmicutes; c__Clostridia; o__Clostridiales; f__Peptostreptococcaceae; g__Peptostreptococcaceae_noname; s__Clostridium_bartlettii	0.325749	0.811205	0.0578461	0.0620693	0.0913164	0.0686668	0.15622	0	0.192137	0.00297	0.00599	0	0	0.00258
k__Bacteria; p__Firmicutes; c__Bacilli; o__Lactobacillales; f__Streptococcaceae; g__Streptococcus; s__Streptococcus_australis	NA	NA	NA	NA	0.0890321	0.0679229	0.0410243	0	0	0.04136	0.01714	0.01855	0	0
k__Bacteria; p__Firmicutes; c__Negativicutes; o__Selenomonadales; f__Veillonellaceae; g__Megamonas; s__Megamonas_rupellensis	NA	NA	NA	NA	0.082323	0.191725	0.199686	0	0	0	0	0	0	0
k__Bacteria; p__Bacteroidetes; c__Bacteroidia; o__Bacteroidales; f__Porphyromonadaceae; g__Parabacteroides; s__Parabacteroides_goldsteinii	0.274818	0.770651	0.028986	0.0496984	0.0791805	0.034599	0.0674332	0.004505	0.0045	0	0	0	0	0
k__Bacteria; p__Firmicutes; c__Clostridia; o__Clostridiales; f__Clostridiaceae; g__Clostridium; s__Clostridium_bolteae	0.291766	0.774617	0.0358018	0.0496984	0.077209	0.243823	0.586549	3.38448	0.429317	0.00807	0.02565	0.03089	1.81052	0.17193
k__Bacteria; p__Bacteroidetes; c__Bacteroidia; o__Bacteroidales; f__Porphyromonadaceae; g__Odoribacter; s__Odoribacter_splanchnicus	0.0509336	0.342892	0.0549868	0.0597951	0.0768913	0.223582	0.173295	0.0156975	0	0	0	0	0	0
k__Bacteria; p__Bacteroidetes; c__Bacteroidia; o__Bacteroidales; f__Bacteroidaceae; g__Bacteroides; s__Bacteroides_xylanisolvens	0.332535	0.811205	0.0269381	0.0496984	0.0753594	0.382479	0.314735	0.250035	0	0.010905	0.05677	0.02819	0.029865	0
k__Bacteria; p__Firmicutes; c__Bacilli; o__Lactobacillales; f__Streptococcaceae; g__Lactococcus; s__Lactococcus_garvieae	0.415209	0.836884	0.035638	0.0496984	0.0740577	0.000573658	0.0199751	0.0164125	0	0	0	0	0	0
k__Bacteria; p__Firmicutes; c__Clostridia; o__Clostridiales; f__Lachnospiraceae; g__Lachnospiraceae_noname; s__Lachnospiraceae_bacterium_3_1_46FAA	0.803238	0.990549	0.0404007	0.0496984	0.0701553	0.0618649	0.114651	0.13768	0	0.001755	0.01296	0	0.05739	0
k__Bacteria; p__Bacteroidetes; c__Bacteroidia; o__Bacteroidales; f__Bacteroidaceae; g__Bacteroides; s__Bacteroides_sp_4_3_47FAA	NA	NA	0.0338729	0.0496984	0.0680985	0	0	0	0	0	0	0	0	0
k__Bacteria; p__Actinobacteria; c__Actinobacteria; o__Coriobacteriales; f__Coriobacteriaceae; g__Eggerthella; s__Eggerthella_lenta	0.0998396	0.53357	0.0284529	0.0496984	0.06431	0.11085	0.105378	0.09981	1.16931	0.01303	0.02384	0.01819	0.0406	0.00213
k__Bacteria; p__Bacteroidetes; c__Bacteroidia; o__Bacteroidales; f__Bacteroidaceae; g__Bacteroides; s__Bacteroides_salyersiae	0.777011	0.990549	0.032702	0.0496984	0.060271	0.157977	0.0873592	1.16731	0	0	0	0	0	0
k__Bacteria; p__Firmicutes; c__Clostridia; o__Clostridiales; f__Lachnospiraceae; g__Dorea; s__Dorea_unclassified	0.155534	0.629774	0.0438066	0.0515684	0.0601039	0.0208885	0.00901676	0.0473925	0.01163	0	0	0	0.007365	0
k__Bacteria; p__Proteobacteria; c__Gammaproteobacteria; o__Pasteurellales; f__Pasteurellaceae; g__Haemophilus; s__Haemophilus_parainfluenzae	NA	NA	NA	NA	0.0585963	0.0913658	0.0204176	0	0	0	0.00051	0	0	0
k__Bacteria; p__Firmicutes; c__Negativicutes; o__Selenomonadales; f__Veillonellaceae; g__Mitsuokella; s__Mitsuokella_multacida	0.254015	0.754043	0.0282171	0.0496984	0.0585301	0.00261439	0.417926	0	0	0	0	0	0	0
k__Bacteria; p__Bacteroidetes; c__Bacteroidia; o__Bacteroidales; f__Bacteroidaceae; g__Bacteroides; s__Bacteroides_finegoldii	0.431401	0.842685	0.0308029	0.0496984	0.0583165	0.218393	0.426649	0.0177375	0	0	0	0	0	0
k__Bacteria; p__Firmicutes; c__Clostridia; o__Clostridiales; f__Lachnospiraceae; g__Blautia; s__Blautia_hydrogenotrophica	0.359046	0.811205	0.0327032	0.0496984	0.0575423	0.122065	0.0533419	0.099045	0	0	0	0	0.006055	0
k__Bacteria; p__Firmicutes; c__Clostridia; o__Clostridiales; f__Lachnospiraceae; g__Anaerostipes; s__Anaerostipes_hadrus	0.11761	0.562888	0.349159	0.349159	0.0568254	0.232041	0.0751559	0.0054375	0	0.011	0.02653	0.00647	0	0
k__Bacteria; p__Firmicutes; c__Clostridia; o__Clostridiales; f__Ruminococcaceae; g__Ruminococcaceae_noname; s__Ruminococcaceae_bacterium_D16	NA	NA	NA	NA	0.0561258	0.0106805	0.076543	0	0	0	0	0	0	0
k__Bacteria; p__Firmicutes; c__Erysipelotrichia; o__Erysipelotrichales; f__Erysipelotrichaceae; g__Erysipelotrichaceae_noname; s__Eubacterium_cylindroides	0.450695	0.849477	0.0391054	0.0496984	0.0533051	0.0474154	0.0225273	0	0.42313	0	0	0	0	0
k__Bacteria; p__Actinobacteria; c__Actinobacteria; o__Bifidobacteriales; f__Bifidobacteriaceae; g__Bifidobacterium; s__Bifidobacterium_catenulatum	NA	NA	NA	NA	0.0523365	0.0298951	0.00315378	0	0	0	0	0	0	0
k__Bacteria; p__Firmicutes; c__Clostridia; o__Clostridiales; f__Lachnospiraceae; g__Anaerostipes; s__Anaerostipes_unclassified	0.444704	0.849477	0.0453781	0.0526382	0.0493978	0.246451	0.092107	0.05964	0.00645	0	0	0	0	0
k__Bacteria; p__Firmicutes; c__Clostridia; o__Clostridiales; f__Lachnospiraceae; g__Lachnospiraceae_noname; s__Lachnospiraceae_bacterium_8_1_57FAA	0.348504	0.811205	0.0843477	0.0870397	0.0477273	0.0269885	0.0458178	0	0	0	0	0	0	0
k__Bacteria; p__Bacteroidetes; c__Bacteroidia; o__Bacteroidales; f__Prevotellaceae; g__Paraprevotella; s__Paraprevotella_clara	0.957049	0.990549	0.0341215	0.0496984	0.0469632	0.0250412	0.0557511	0.508273	0	0	0	0	0	0
k__Bacteria; p__Proteobacteria; c__Deltaproteobacteria; o__Desulfovibrionales; f__Desulfovibrionaceae; g__Desulfovibrio; s__Desulfovibrio_piger	NA	NA	NA	NA	0.0465079	0.0178795	0.0633332	0	0	0	0	0	0	0
k__Bacteria; p__Firmicutes; c__Erysipelotrichia; o__Erysipelotrichales; f__Erysipelotrichaceae; g__Coprobacillus; s__Coprobacillus_unclassified	0.232192	0.725139	0.0915919	0.0939156	0.0431405	0.251579	0.650088	0.010635	0.159807	0	0	0.00105	0.00443	0.02891
k__Bacteria; p__Firmicutes; c__Clostridia; o__Clostridiales; f__Ruminococcaceae; g__Ruminococcus; s__Ruminococcus_sp_JC304	0.692695	0.961473	0.0379908	0.0496984	0.0404568	0.0418344	0.13433	0	0	0	0	0	0	0
k__Bacteria; p__Proteobacteria; c__Betaproteobacteria; o__Burkholderiales; f__Burkholderiales_noname; g__Burkholderiales_noname; s__Burkholderiales_bacterium_1_1_47	0.810862	0.990549	0.033639	0.0496984	0.0396194	0.040182	0.012956	0.0094425	0.00916667	0	0	0	0	0
k__Bacteria; p__Bacteroidetes; c__Bacteroidia; o__Bacteroidales; f__Bacteroidaceae; g__Bacteroides; s__Bacteroides_clarus	0.853961	0.990549	0.0335686	0.0496984	0.0388164	0.136899	0.0127451	1.34421	0	0	0	0	0	0
k__Bacteria; p__Firmicutes; c__Clostridia; o__Clostridiales; f__Eubacteriaceae; g__Eubacterium; s__Eubacterium_limosum	0.821439	0.990549	0.0349339	0.0496984	0.0372789	0.0180415	0.108582	0.00334	0.746323	0	0	0	0	0
k__Bacteria; p__Proteobacteria; c__Gammaproteobacteria; o__Enterobacteriales; f__Enterobacteriaceae; g__Citrobacter; s__Citrobacter_unclassified	0.250664	0.754043	0.0379754	0.0496984	0.0364658	8.36585e-05	3.86486e-05	0	0	0	0	0	0	0
k__Bacteria; p__Actinobacteria; c__Actinobacteria; o__Actinomycetales; f__Micrococcaceae; g__Rothia; s__Rothia_mucilaginosa	0.628945	0.905008	0.0412937	0.0498353	0.0364078	0.0337088	0.0618962	0	0.01233	0.000865	0.00453	0.0071	0	0
k__Bacteria; p__Bacteroidetes; c__Bacteroidia; o__Bacteroidales; f__Rikenellaceae; g__Alistipes; s__Alistipes_sp_AP11	0.0800676	0.457356	0.0127269	0.0496984	0.035969	0.0978951	0	0.034375	0	0	0	0	0	0
k__Bacteria; p__Bacteroidetes; c__Bacteroidia; o__Bacteroidales; f__Bacteroidaceae; g__Bacteroides; s__Bacteroides_intestinalis	NA	NA	NA	NA	0.0359631	0.0357134	0.0196773	0	0	0	0	0	0	0
k__Bacteria; p__Proteobacteria; c__Gammaproteobacteria; o__Enterobacteriales; f__Enterobacteriaceae; g__Enterobacter; s__Enterobacter_sp_MGH_8	NA	NA	0.0338729	0.0496984	0.0356638	0	0	0	0	0	0	0	0	0
k__Bacteria; p__Firmicutes; c__Negativicutes; o__Selenomonadales; f__Veillonellaceae; g__Megamonas; s__Megamonas_funiformis	0.191588	0.675036	0.0357886	0.0496984	0.0343465	0.0123632	0.187478	0	0	0	0	0	0	0
k__Bacteria; p__Bacteroidetes; c__Bacteroidia; o__Bacteroidales; f__Rikenellaceae; g__Alistipes; s__Alistipes_finegoldii	0.118088	0.562888	0.0284001	0.0496984	0.0336365	0.0946976	0.0385792	0.00085	0	0	0.00789	0	0	0
k__Bacteria; p__Firmicutes; c__Bacilli; o__Lactobacillales; f__Streptococcaceae; g__Streptococcus; s__Streptococcus_sanguinis	0.179384	0.669582	0.0350668	0.0496984	0.0322997	0.0476093	0.0623962	0.05707	0.0103267	0.00971	0.0196	0.01497	0.031685	0
k__Bacteria; p__Proteobacteria; c__Gammaproteobacteria; o__Enterobacteriales; f__Enterobacteriaceae; g__Enterobacter; s__Enterobacter_cloacae	0.714092	0.961473	0.0327387	0.0496984	0.0321286	0.0835427	2.68239	0	0.00871333	0	0	0	0	0.01009
k__Bacteria; p__Proteobacteria; c__Betaproteobacteria; o__Burkholderiales; f__Oxalobacteraceae; g__Oxalobacter; s__Oxalobacter_formigenes	0.336528	0.811205	0.0292902	0.0496984	0.0319405	0.00704073	0.000707568	0	0.00356333	0	0	0	0	0
k__Bacteria; p__Proteobacteria; c__Betaproteobacteria; o__Burkholderiales; f__Sutterellaceae; g__Parasutterella; s__Parasutterella_excrementihominis	0.89273	0.990549	0.0342705	0.0496984	0.0311229	0.0558078	0.0131749	0.00242	0.00158333	0	0	0	0	0
k__Bacteria; p__Firmicutes; c__Bacilli; o__Lactobacillales; f__Streptococcaceae; g__Streptococcus; s__Streptococcus_thermophilus	0.5048	0.849477	0.0298915	0.0496984	0.0294953	0.117546	0.0247957	0.01173	0.02006	0	0	0	0	0
k__Archaea; p__Euryarchaeota; c__Methanobacteria; o__Methanobacteriales; f__Methanobacteriaceae; g__Methanosphaera; s__Methanosphaera_stadtmanae	0.975321	0.990549	0.0407618	0.0498353	0.0281327	0	0.0690592	0	0	0	0	0	0	0
k__Bacteria; p__Firmicutes; c__Clostridia; o__Clostridiales; f__Lachnospiraceae; g__Lachnospiraceae_noname; s__Lachnospiraceae_bacterium_3_1_57FAA_CT1	0.421772	0.836884	0.0346814	0.0496984	0.0281195	0.141954	0.010563	0.123607	0	0	0	0	0	0
k__Bacteria; p__Firmicutes; c__Erysipelotrichia; o__Erysipelotrichales; f__Erysipelotrichaceae; g__Erysipelotrichaceae_noname; s__Erysipelotrichaceae_bacterium_6_1_45	0.713452	0.961473	0.0326651	0.0496984	0.0278826	0.0151068	0.033093	0.00164	0.01819	0.00057	0.00065	0	0	0.00371
k__Bacteria; p__Bacteroidetes; c__Bacteroidia; o__Bacteroidales; f__Bacteroidaceae; g__Bacteroides; s__Bacteroides_coprophilus	0.481861	0.849477	0.0345982	0.0496984	0.0275163	0.242837	0.000216487	0	0	0	0	0	0	0
k__Bacteria; p__Firmicutes; c__Bacilli; o__Lactobacillales; f__Streptococcaceae; g__Streptococcus; s__Streptococcus_anginosus	0.5056	0.849477	0.0360298	0.0496984	0.0269389	0.068582	0.0402913	0.001815	0.68347	0.00152	0.00562	0.01672	0	0
k__Archaea; p__Euryarchaeota; c__Methanobacteria; o__Methanobacteriales; f__Methanobacteriaceae; g__Methanobrevibacter; s__Methanobrevibacter_unclassified	0.541458	0.864957	0.0344118	0.0496984	0.0260838	0	0.0138368	0.01773	0	0	0	0	0	0
k__Bacteria; p__Firmicutes; c__Erysipelotrichia; o__Erysipelotrichales; f__Erysipelotrichaceae; g__Erysipelotrichaceae_noname; s__Erysipelotrichaceae_bacterium_3_1_53	0.824852	0.990549	0.0339152	0.0496984	0.0257219	0.00559878	0.0935635	0.00201	0	0	0	0	0	0
k__Bacteria; p__Actinobacteria; c__Actinobacteria; o__Bifidobacteriales; f__Bifidobacteriaceae; g__Bifidobacterium; s__Bifidobacterium_dentium	0.381749	0.817724	0.0350379	0.0496984	0.0254223	0.013679	0.232344	0.0039325	0.267983	0	0	0	0	0
k__Bacteria; p__Actinobacteria; c__Actinobacteria; o__Actinomycetales; f__Actinomycetaceae; g__Actinomyces; s__Actinomyces_odontolyticus	0.314969	0.811205	0.0480433	0.0545898	0.0233918	0.0289217	0.080684	0.0022625	0.140543	0.00953	0.01384	0.03068	0.00091	0
k__Bacteria; p__Firmicutes; c__Clostridia; o__Clostridiales; f__Ruminococcaceae; g__Anaerotruncus; s__Anaerotruncus_colihominis	0.262681	0.766359	0.0322637	0.0496984	0.0231277	0.0265015	0.0141951	0	0.0363033	0.00069	0	0	0	0
k__Bacteria; p__Firmicutes; c__Clostridia; o__Clostridiales; f__Lachnospiraceae; g__Roseburia; s__Roseburia_unclassified	0.149759	0.62043	0.0204869	0.0496984	0.0231094	0.112724	0.0253332	0.0051525	0	0	0	0	0	0
k__Bacteria; p__Firmicutes; c__Erysipelotrichia; o__Erysipelotrichales; f__Erysipelotrichaceae; g__Turicibacter; s__Turicibacter_unclassified	0.93548	0.990549	0.0338395	0.0496984	0.0230832	0.00221268	0.000767297	0	0	0	0	0	0	0
k__Bacteria; p__Firmicutes; c__Negativicutes; o__Selenomonadales; f__Veillonellaceae; g__Veillonella; s__Veillonella_unclassified	0.701975	0.961473	0.0333244	0.0496984	0.022995	0.028599	0.0803616	2.27223	0.02513	0.00174	0.00443	0.00344	0.001745	0
k__Bacteria; p__Firmicutes; c__Bacilli; o__Lactobacillales; f__Streptococcaceae; g__Lactococcus; s__Lactococcus_lactis	0.923882	0.990549	0.0355958	0.0496984	0.022743	0.00135317	0.00610865	1.22502	0	0	0	0	0	0
k__Bacteria; p__Firmicutes; c__Clostridia; o__Clostridiales; f__Clostridiaceae; g__Clostridium; s__Clostridium_symbiosum	0.570153	0.873772	0.0380269	0.0496984	0.0227367	0.06254	0.0773308	0.367563	0.27882	0	0	0	0	0.31726
k__Bacteria; p__Proteobacteria; c__Gammaproteobacteria; o__Enterobacteriales; f__Enterobacteriaceae; g__Citrobacter; s__Citrobacter_freundii	NA	NA	0.0338729	0.0496984	0.0224556	0	0	0	0	0	0	0	0	0
k__Bacteria; p__Firmicutes; c__Clostridia; o__Clostridiales; f__Clostridiales_noname; g__Flavonifractor; s__Flavonifractor_plautii	0.779147	0.990549	0.0322628	0.0496984	0.0224441	0.0153576	0.0425711	0.028305	0.09958	0.0002	0.00344	0.00461	0.02838	0.03753
k__Bacteria; p__Firmicutes; c__Erysipelotrichia; o__Erysipelotrichales; f__Erysipelotrichaceae; g__Holdemania; s__Holdemania_filiformis	0.986907	0.990549	0.0340366	0.0496984	0.0224064	0.00975073	0.0185722	0	0.000106667	0.00298	0	0	0	0
k__Bacteria; p__Firmicutes; c__Bacilli; o__Lactobacillales; f__Streptococcaceae; g__Streptococcus; s__Streptococcus_mitis_oralis_pneumoniae	0.84455	0.990549	0.0337767	0.0496984	0.0222735	0.0111878	0.023877	2.58257	0.00133	0.004845	0.0045	0.00203	0.008155	0
k__Bacteria; p__Firmicutes; c__Bacilli; o__Lactobacillales; f__Lactobacillaceae; g__Lactobacillus; s__Lactobacillus_casei_paracasei	0.936247	0.990549	0.0346154	0.0496984	0.020375	0.020699	0.0527684	0.01946	0	0	0	0	0	0
k__Bacteria; p__Bacteroidetes; c__Bacteroidia; o__Bacteroidales; f__Porphyromonadaceae; g__Coprobacter; s__Coprobacter_fastidiosus	0.862448	0.990549	0.0391766	0.0496984	0.0191392	0.0165788	0.00795676	0	0	0	0	0	0	0
k__Bacteria; p__Firmicutes; c__Clostridia; o__Clostridiales; f__Lachnospiraceae; g__Blautia; s__Blautia_producta	0.879758	0.990549	0.0343937	0.0496984	0.0182645	0.0370727	0.0126022	0.28592	0.0186167	0	0	0	0	0.01422
k__Bacteria; p__Proteobacteria; c__Deltaproteobacteria; o__Desulfovibrionales; f__Desulfovibrionaceae; g__Desulfovibrio; s__Desulfovibrio_desulfuricans	0.860905	0.990549	0.0332388	0.0496984	0.0180386	0.00335	0.00286919	0	0.198017	0	0	0	0	0
k__Bacteria; p__Firmicutes; c__Bacilli; o__Lactobacillales; f__Streptococcaceae; g__Streptococcus; s__Streptococcus_infantis	0.805478	0.990549	0.0366248	0.0496984	0.0177417	0.0267495	0.0322111	0.0031075	0.00119333	0.00509	0.00055	0.00141	0	0
k__Bacteria; p__Proteobacteria; c__Deltaproteobacteria; o__Desulfovibrionales; f__Desulfovibrionaceae; g__Bilophila; s__Bilophila_wadsworthia	0.132067	0.593027	0.0435298	0.0514926	0.0174231	0.0271039	0.0456292	0.05357	0.00673667	0.00295	0.00828	0.01553	0.00178	0.0007
k__Bacteria; p__Firmicutes; c__Bacilli; o__Lactobacillales; f__Streptococcaceae; g__Streptococcus; s__Streptococcus_vestibularis	NA	NA	NA	NA	0.0164267	0.236126	0.255395	0	0	0	0	0	0	0
k__Bacteria; p__Firmicutes; c__Clostridia; o__Clostridiales; f__Lachnospiraceae; g__Lachnospiraceae_noname; s__Lachnospiraceae_bacterium_5_1_57FAA	0.417298	0.836884	0.034044	0.0496984	0.0158118	0.00969927	0.0274773	0.0015975	0.0172633	0	0	0	0	0
k__Bacteria; p__Bacteroidetes; c__Bacteroidia; o__Bacteroidales; f__Porphyromonadaceae; g__Parabacteroides; s__Parabacteroides_johnsonii	0.206316	0.70073	0.0307736	0.0496984	0.0149321	0.0273488	0.0975292	0.01592	0.00440667	0	0	0	0.00776	0
k__Bacteria; p__Firmicutes; c__Bacilli; o__Lactobacillales; f__Lactobacillaceae; g__Lactobacillus; s__Lactobacillus_mucosae	0.709739	0.961473	0.0320351	0.0496984	0.0140769	0	0.0011027	0	0	0	0	0	0	0
k__Bacteria; p__Firmicutes; c__Clostridia; o__Clostridiales; f__Clostridiaceae; g__Clostridium; s__Clostridium_asparagiforme	0.35256	0.811205	0.0289087	0.0496984	0.0136531	0.0127781	0.0448716	0.0284175	0.00831667	0	0	0.00094	0	0
k__Bacteria; p__Firmicutes; c__Negativicutes; o__Selenomonadales; f__Veillonellaceae; g__Mitsuokella; s__Mitsuokella_unclassified	0.268327	0.766359	0.0284344	0.0496984	0.0132624	0.00830415	0.171683	0	0	0	0	0	0	0
k__Bacteria; p__Firmicutes; c__Negativicutes; o__Selenomonadales; f__Veillonellaceae; g__Veillonella; s__Veillonella_parvula	0.575624	0.87565	0.0326578	0.0496984	0.0128492	0.0128568	0.0256465	8.45844	0.04529	0	0	0	0	0
k__Bacteria; p__Firmicutes; c__Clostridia; o__Clostridiales; f__Lachnospiraceae; g__Anaerostipes; s__Anaerostipes_caccae	0.372454	0.811205	0.0362673	0.0496984	0.0125947	0.0100449	0.00318649	0	0	0	0	0	0	0
k__Bacteria; p__Firmicutes; c__Bacilli; o__Bacillales; f__Bacillales_noname; g__Gemella; s__Gemella_sanguinis	0.566506	0.872651	0.031821	0.0496984	0.0121441	0.0177549	0.0146346	0.0016325	0.000733333	0.00099	0	0.00301	0	0
k__Bacteria; p__Firmicutes; c__Clostridia; o__Clostridiales; f__Clostridiaceae; g__Clostridium; s__Clostridium_clostridioforme	0.448559	0.849477	0.0368071	0.0496984	0.0119365	0.0177024	0.189745	2.54444	0.0203067	0	0	0	0	0.01787
k__Bacteria; p__Proteobacteria; c__Deltaproteobacteria; o__Desulfovibrionales; f__Desulfovibrionaceae; g__Bilophila; s__Bilophila_sp_4_1_30	0.709718	0.961473	0.0320269	0.0496984	0.0116785	0	0.00806676	0	0	0	0	0	0	0
k__Bacteria; p__Firmicutes; c__Bacilli; o__Lactobacillales; f__Carnobacteriaceae; g__Granulicatella; s__Granulicatella_unclassified	0.510013	0.849477	0.0392063	0.0496984	0.0110376	0.0118549	0.0843462	0.0281225	0	0.007085	0.00255	0.00587	0.004705	0
k__Bacteria; p__Firmicutes; c__Clostridia; o__Clostridiales; f__Lachnospiraceae; g__Lachnospiraceae_noname; s__Lachnospiraceae_bacterium_7_1_58FAA	0.938802	0.990549	0.0337498	0.0496984	0.0109082	0.0247471	0.0261095	0.0665175	0.00274	0.00207	0.00361	0.00315	0.034725	0
k__Bacteria; p__Firmicutes; c__Erysipelotrichia; o__Erysipelotrichales; f__Erysipelotrichaceae; g__Coprobacillus; s__Coprobacillus_sp_29_1	0.243864	0.741425	0.0356524	0.0496984	0.0106797	0.296833	0.00515432	0	0	0	0	0	0	0
k__Bacteria; p__Actinobacteria; c__Actinobacteria; o__Actinomycetales; f__Actinomycetaceae; g__Actinomyces; s__Actinomyces_turicensis	0.286015	0.77253	0.0333174	0.0496984	0.010056	0.0360581	0.0151527	0	0.00352333	0	0	0	0	0
k__Bacteria; p__Firmicutes; c__Negativicutes; o__Selenomonadales; f__Acidaminococcaceae; g__Acidaminococcus; s__Acidaminococcus_intestini	0.28232	0.771264	0.0669895	0.0701726	0.00944782	0.00379951	0.00059973	0	0	0	0	0	0	0
k__Bacteria; p__Actinobacteria; c__Actinobacteria; o__Bifidobacteriales; f__Bifidobacteriaceae; g__Alloscardovia; s__Alloscardovia_omnicolens	0.902827	0.990549	0.0398361	0.0496984	0.00937487	0.000587561	0.844905	0.0002075	0.0209267	0	0	0	0	0
k__Bacteria; p__Firmicutes; c__Erysipelotrichia; o__Erysipelotrichales; f__Erysipelotrichaceae; g__Turicibacter; s__Turicibacter_sanguinis	0.740136	0.970327	0.032559	0.0496984	0.00934423	0.000653415	0.000107027	0	0	0	0	0	0	0
k__Bacteria; p__Proteobacteria; c__Gammaproteobacteria; o__Enterobacteriales; f__Enterobacteriaceae; g__Klebsiella; s__Klebsiella_sp_MS_92_3	NA	NA	0.0338729	0.0496984	0.00929449	0	0	0	0	0	0	0	0	0
k__Bacteria; p__Bacteroidetes; c__Bacteroidia; o__Bacteroidales; f__Prevotellaceae; g__Prevotella; s__Prevotella_buccae	NA	NA	0.0338729	0.0496984	0.0090109	0	0	0	0	0	0	0	0	0
k__Bacteria; p__Firmicutes; c__Erysipelotrichia; o__Erysipelotrichales; f__Erysipelotrichaceae; g__Erysipelotrichaceae_noname; s__Clostridium_ramosum	0.49952	0.849477	0.0272952	0.0496984	0.00891744	0.0673507	0.066383	0.020785	0	0	0	0	0	0
k__Bacteria; p__Actinobacteria; c__Actinobacteria; o__Actinomycetales; f__Actinomycetaceae; g__Actinomyces; s__Actinomyces_graevenitzii	0.193804	0.676521	0.058274	0.0622907	0.00816667	0.0196019	0.0741668	0.0111125	0.170877	0	0.00174	0.01889	0.00144	0
k__Bacteria; p__Bacteroidetes; c__Bacteroidia; o__Bacteroidales; f__Rikenellaceae; g__Alistipes; s__Alistipes_senegalensis	0.158303	0.629774	0.0328173	0.0496984	0.00779692	0.00534829	0.00492324	0.00085	0	0	0	0	0	0
k__Bacteria; p__Firmicutes; c__Erysipelotrichia; o__Erysipelotrichales; f__Erysipelotrichaceae; g__Erysipelotrichaceae_noname; s__Erysipelotrichaceae_bacterium_2_2_44A	0.111059	0.550913	0.0176231	0.0496984	0.00770962	0.00934634	0.00456973	0.00172	0.0107633	0	0.00162	0	0	0
k__Bacteria; p__Firmicutes; c__Clostridia; o__Clostridiales; f__Clostridiales_noname; g__Clostridiales_noname; s__Clostridiales_bacterium_1_7_47FAA	0.608018	0.898912	0.0318674	0.0496984	0.00754346	0.031748	0.0307562	0.0368175	0.00245333	0	0	0	0	0
k__Bacteria; p__Firmicutes; c__Clostridia; o__Clostridiales; f__Clostridiaceae; g__Clostridium; s__Clostridium_citroniae	0.452065	0.849477	0.0282446	0.0496984	0.00732987	0.0136715	0.0272027	0.145858	0.000846667	0	0.00281	0.00024	0.074425	0
k__Bacteria; p__Firmicutes; c__Bacilli; o__Lactobacillales; f__Leuconostocaceae; g__Weissella; s__Weissella_confusa	0.360737	0.811205	0.0346131	0.0496984	0.00722064	0.0119988	0.000755405	0.01368	0	0	0	0	0	0
k__Bacteria; p__Proteobacteria; c__Betaproteobacteria; o__Burkholderiales; f__Sutterellaceae; g__Sutterella; s__Sutterella_parvirubra	0.947077	0.990549	0.0340273	0.0496984	0.00721487	0.0061378	0	0	0.10744	0	0	0	0	0
k__Bacteria; p__Firmicutes; c__Erysipelotrichia; o__Erysipelotrichales; f__Erysipelotrichaceae; g__Erysipelotrichaceae_noname; s__Clostridium_innocuum	0.471418	0.849477	0.0400484	0.0496984	0.00712821	0.0157327	0.0655738	0.0902675	0.807197	0.00114	0	0	0	0.00227
k__Bacteria; p__Firmicutes; c__Clostridia; o__Clostridiales; f__Eubacteriaceae; g__Eubacterium; s__Eubacterium_sp_3_1_31	0.317666	0.811205	0.0298588	0.0496984	0.00707051	0.0515288	0.0108878	0.0139525	0	0	0	0	0	0
k__Bacteria; p__Firmicutes; c__Clostridia; o__Clostridiales; f__Lachnospiraceae; g__Lachnospiraceae_noname; s__Lachnospiraceae_bacterium_9_1_43BFAA	0.665826	0.941164	0.0311325	0.0496984	0.00689936	0.0116188	0.00410459	0	0	0	0	0	0	0
k__Bacteria; p__Firmicutes; c__Erysipelotrichia; o__Erysipelotrichales; f__Erysipelotrichaceae; g__Holdemania; s__Holdemania_unclassified	NA	NA	NA	NA	0.00673449	0.00755902	0.00877054	0	0	0	0	0	0	0
k__Bacteria; p__Actinobacteria; c__Actinobacteria; o__Coriobacteriales; f__Coriobacteriaceae; g__Olsenella; s__Olsenella_unclassified	NA	NA	NA	NA	0.00647808	0.00422707	0.00783405	0	0	0	0	0	0	0
k__Bacteria; p__Firmicutes; c__Clostridia; o__Clostridiales; f__Ruminococcaceae; g__Ruminococcus; s__Ruminococcus_champanellensis	NA	NA	0.0338729	0.0496984	0.00613923	0	0	0	0	0	0	0	0	0
k__Bacteria; p__Proteobacteria; c__Gammaproteobacteria; o__Enterobacteriales; f__Enterobacteriaceae; g__Klebsiella; s__Klebsiella_oxytoca	0.889659	0.990549	0.0341673	0.0496984	0.00611897	0	0.00691487	0	0	0	0	0	0	0
k__Bacteria; p__Bacteroidetes; c__Bacteroidia; o__Bacteroidales; f__Rikenellaceae; g__Alistipes; s__Alistipes_unclassified	0.729883	0.970327	0.0318822	0.0496984	0.00606718	0.00697317	0.0776016	0.0622525	0	0	0	0	0.013495	0
k__Bacteria; p__Firmicutes; c__Bacilli; o__Lactobacillales; f__Carnobacteriaceae; g__Granulicatella; s__Granulicatella_adiacens	0.439756	0.849477	0.0509344	0.0567889	0.00600795	0.00455634	0.0753065	0.0074125	0.00653333	0	0	0	0.001665	0
k__Bacteria; p__Proteobacteria; c__Gammaproteobacteria; o__Enterobacteriales; f__Enterobacteriaceae; g__Klebsiella; s__Klebsiella_unclassified	0.286881	0.77253	0.0329901	0.0496984	0.00558103	0.000847073	0.00209054	0	0	0	0	0	0	0
k__Bacteria; p__Firmicutes; c__Bacilli; o__Lactobacillales; f__Leuconostocaceae; g__Leuconostoc; s__Leuconostoc_lactis	0.699201	0.961473	0.031702	0.0496984	0.00541231	0.00365634	0.00260243	0	0	0	0	0	0	0
k__Bacteria; p__Firmicutes; c__Clostridia; o__Clostridiales; f__Ruminococcaceae; g__Anaerotruncus; s__Anaerotruncus_unclassified	0.482933	0.849477	0.028888	0.0496984	0.0052741	0.00219902	0.00342297	0	0.0222867	0	0	0	0	0
k__Bacteria; p__Bacteroidetes; c__Bacteroidia; o__Bacteroidales; f__Bacteroidaceae; g__Bacteroides; s__Bacteroides_faecis	0.300828	0.793092	0.0379963	0.0496984	0.00517564	0.0262712	0.070013	0.0169175	0	0	0	0	0	0
k__Bacteria; p__Firmicutes; c__Negativicutes; o__Selenomonadales; f__Veillonellaceae; g__Veillonella; s__Veillonella_atypica	0.0640128	0.407947	0.0218791	0.0496984	0.00517154	0.00512317	0.00734135	0.0019325	0	0	0	0	0	0
k__Bacteria; p__Bacteroidetes; c__Bacteroidia; o__Bacteroidales; f__Bacteroidaceae; g__Bacteroides; s__Bacteroides_sp_1_1_6	NA	NA	0.0338729	0.0496984	0.00497103	0	0	0	0	0	0	0	0	0
k__Bacteria; p__Actinobacteria; c__Actinobacteria; o__Bifidobacteriales; f__Bifidobacteriaceae; g__Gardnerella; s__Gardnerella_vaginalis	0.967606	0.990549	0.0339029	0.0496984	0.00492718	0.00029561	0.00700541	0.00297	0	0	0	0	0	0
k__Bacteria; p__Firmicutes; c__Bacilli; o__Lactobacillales; f__Streptococcaceae; g__Streptococcus; s__Streptococcus_gordonii	0.981225	0.990549	0.034719	0.0496984	0.00491026	0.0102376	0.0104976	0.396955	0.00363667	0	0	0	0.069315	0
k__Bacteria; p__Firmicutes; c__Clostridia; o__Clostridiales; f__Clostridiales_Family_XI_Incertae_Sedis; g__Parvimonas; s__Parvimonas_unclassified	0.485125	0.849477	0.0431281	0.0511421	0.00487949	0.0340246	0.0805189	0.0340825	0.00475667	0	0	0	0.007405	0
k__Bacteria; p__Firmicutes; c__Clostridia; o__Clostridiales; f__Clostridiaceae; g__Clostridium; s__Clostridium_sp_KLE_1755	NA	NA	0.0338729	0.0496984	0.00487885	0	0	0	0	0	0	0	0	0
k__Bacteria; p__Firmicutes; c__Bacilli; o__Lactobacillales; f__Leuconostocaceae; g__Weissella; s__Weissella_cibaria	0.224503	0.7234	0.0378106	0.0496984	0.00478051	0.00309927	0.000548378	0	0	0	0	0	0	0
k__Bacteria; p__Firmicutes; c__Bacilli; o__Lactobacillales; f__Streptococcaceae; g__Streptococcus; s__Streptococcus_pasteurianus	0.472617	0.849477	0.0287185	0.0496984	0.00467974	0.00441268	0.00129838	0	0	0	0	0	0	0
k__Bacteria; p__Actinobacteria; c__Actinobacteria; o__Actinomycetales; f__Actinomycetaceae; g__Actinomyces; s__Actinomyces_johnsonii	0.487589	0.849477	0.0453986	0.0526382	0.00461846	0.00193073	0.00406784	0	0.00148333	0	0	0	0	0
k__Bacteria; p__Actinobacteria; c__Actinobacteria; o__Actinomycetales; f__Actinomycetaceae; g__Actinomyces; s__Actinomyces_massiliensis	0.0712787	0.426998	0.027708	0.0496984	0.00460449	0.00369171	0.0225478	0.0061825	0.0317033	0	0	0	0	0
k__Bacteria; p__Firmicutes; c__Bacilli; o__Lactobacillales; f__Streptococcaceae; g__Streptococcus; s__Streptococcus_cristatus	0.807467	0.990549	0.0328649	0.0496984	0.00440821	0.00139293	0.0027673	0.0053625	0	0	0	0	0	0
k__Bacteria; p__Firmicutes; c__Clostridia; o__Clostridiales; f__Clostridiaceae; g__Clostridiaceae_noname; s__Clostridiaceae_bacterium_JC118	NA	NA	NA	NA	0.00438154	0.00164878	0.00341135	0	0	0	0	0	0	0
k__Bacteria; p__Actinobacteria; c__Actinobacteria; o__Actinomycetales; f__Actinomycetaceae; g__Actinomyces; s__Actinomyces_naeslundii	0.158696	0.629774	0.0420232	0.0503241	0.00434859	0.00470049	0.00608378	0	0.0106367	0	0	0	0	0
k__Bacteria; p__Firmicutes; c__Clostridia; o__Clostridiales; f__Peptostreptococcaceae; g__Peptostreptococcus; s__Peptostreptococcus_stomatis	0.275963	0.770651	0.0506599	0.0566131	0.00427026	0.0131671	0.150677	0.009035	0.00135333	0	0	0	0.008325	0
k__Bacteria; p__Actinobacteria; c__Actinobacteria; o__Actinomycetales; f__Actinomycetaceae; g__Actinomyces; s__Actinomyces_viscosus	0.558685	0.872651	0.0339754	0.0496984	0.00424756	0.00730341	0.0129922	0	0.00213333	0	0.00157	0.00293	0	0
k__Bacteria; p__Bacteroidetes; c__Bacteroidia; o__Bacteroidales; f__Bacteroidaceae; g__Bacteroides; s__Bacteroides_nordii	0.666554	0.941164	0.0342834	0.0496984	0.0039718	0.00869415	0.00530135	0.062775	0.00965333	0	0	0	0	0
k__Bacteria; p__Firmicutes; c__Bacilli; o__Lactobacillales; f__Streptococcaceae; g__Streptococcus; s__Streptococcus_infantarius	0.566792	0.872651	0.0437307	0.0515684	0.00395397	0.212028	0.00272865	0.0412625	0	0	0	0	0	0
k__Bacteria; p__Firmicutes; c__Negativicutes; o__Selenomonadales; f__Veillonellaceae; g__Veillonella; s__Veillonella_dispar	0.133213	0.593027	0.0225028	0.0496984	0.00388692	0.00177488	0.00335757	0	0	0	0	0	0	0
k__Bacteria; p__Bacteroidetes; c__Bacteroidia; o__Bacteroidales; f__Prevotellaceae; g__Paraprevotella; s__Paraprevotella_xylaniphila	0.749068	0.976827	0.0322945	0.0496984	0.00383487	0.00280293	0.0104432	0.0033275	0	0	0	0	0	0
k__Bacteria; p__Firmicutes; c__Bacilli; o__Lactobacillales; f__Leuconostocaceae; g__Leuconostoc; s__Leuconostoc_carnosum	NA	NA	0.0338729	0.0496984	0.0037859	0	0	0	0	0	0	0	0	0
k__Bacteria; p__Actinobacteria; c__Actinobacteria; o__Actinomycetales; f__Actinomycetaceae; g__Actinomyces; s__Actinomyces_sp_HPA0247	0.131183	0.593027	0.0415992	0.0499396	0.00370436	0.00884073	0.0470738	0	0	0	0	0	0	0
k__Bacteria; p__Firmicutes; c__Erysipelotrichia; o__Erysipelotrichales; f__Erysipelotrichaceae; g__Solobacterium; s__Solobacterium_moorei	0.951332	0.990549	0.0360495	0.0496984	0.00345359	0.0190271	0.00442162	0.0025875	0.00429333	0	0	0	0	0
k__Bacteria; p__Firmicutes; c__Bacilli; o__Lactobacillales; f__Leuconostocaceae; g__Leuconostoc; s__Leuconostoc_mesenteroides	0.81061	0.990549	0.0393176	0.0496984	0.00340603	2.07317e-05	0.000387297	0	0	0	0	0	0	0
k__Bacteria; p__Actinobacteria; c__Actinobacteria; o__Actinomycetales; f__Propionibacteriaceae; g__Propionibacterium; s__Propionibacterium_propionicum	0.165493	0.643206	0.0862418	0.0888052	0.00335667	0.000798537	0.0239108	0.031775	0	0	0	0	0	0
k__Bacteria; p__Firmicutes; c__Negativicutes; o__Selenomonadales; f__Acidaminococcaceae; g__Acidaminococcus; s__Acidaminococcus_sp_D21	NA	NA	0.0338729	0.0496984	0.00331154	0	0	0	0	0	0	0	0	0
k__Bacteria; p__Firmicutes; c__Erysipelotrichia; o__Erysipelotrichales; f__Erysipelotrichaceae; g__Erysipelotrichaceae_noname; s__Erysipelotrichaceae_bacterium_21_3	0.157597	0.629774	0.0267921	0.0496984	0.00328205	0.00249098	0.0187011	0.0042625	0	0	0	0	0	0
k__Bacteria; p__Firmicutes; c__Clostridia; o__Clostridiales; f__Lachnospiraceae; g__Lachnospiraceae_noname; s__Lachnospiraceae_bacterium_2_1_46FAA	NA	NA	NA	NA	0.00327731	4.39024e-05	0.311538	0	0	0	0	0	0	0
k__Bacteria; p__Actinobacteria; c__Actinobacteria; o__Actinomycetales; f__Corynebacteriaceae; g__Corynebacterium; s__Corynebacterium_durum	0.442803	0.849477	0.0399516	0.0496984	0.00308077	0.00145634	0.0052054	0.002605	0.00808333	0	0	0	0	0
k__Bacteria; p__Actinobacteria; c__Actinobacteria; o__Coriobacteriales; f__Coriobacteriaceae; g__Atopobium; s__Atopobium_parvulum	0.119446	0.562888	0.077215	0.0798492	0.0030159	0.00161366	0.220535	0.02937	0.0166467	0	0	0	0.000635	0
k__Bacteria; p__Firmicutes; c__Bacilli; o__Lactobacillales; f__Lactobacillaceae; g__Lactobacillus; s__Lactobacillus_sanfranciscensis	NA	NA	0.0338729	0.0496984	0.0029991	0	0	0	0	0	0	0	0	0
k__Bacteria; p__Proteobacteria; c__Gammaproteobacteria; o__Enterobacteriales; f__Enterobacteriaceae; g__Enterobacter; s__Enterobacter_aerogenes	NA	NA	0.0338729	0.0496984	0.00279551	0	0	0	0	0	0	0	0	0
k__Bacteria; p__Firmicutes; c__Bacilli; o__Lactobacillales; f__Leuconostocaceae; g__Leuconostoc; s__Leuconostoc_unclassified	0.498564	0.849477	0.0313376	0.0496984	0.0027368	0.00253634	0.0015646	0	0.00141333	0	0	0	0	0
k__Bacteria; p__Actinobacteria; c__Actinobacteria; o__Coriobacteriales; f__Coriobacteriaceae; g__Eggerthella; s__Eggerthella_sp_1_3_56FAA	0.981694	0.990549	0.0194793	0.0496984	0.00273628	0.0307076	0	0	0	0	0	0	0	0
k__Bacteria; p__Actinobacteria; c__Actinobacteria; o__Actinomycetales; f__Micrococcaceae; g__Rothia; s__Rothia_dentocariosa	0.941748	0.990549	0.0346392	0.0496984	0.00272218	0.00309951	0.00368189	0	0.14844	0	0	0	0	0
k__Bacteria; p__Firmicutes; c__Bacilli; o__Lactobacillales; f__Aerococcaceae; g__Abiotrophia; s__Abiotrophia_defectiva	0.26657	0.766359	0.074939	0.0776612	0.00266936	0.00226683	0.00524811	1.26841	0	0	0	0	0.11878	0
k__Bacteria; p__Bacteroidetes; c__Bacteroidia; o__Bacteroidales; f__Bacteroidaceae; g__Bacteroides; s__Bacteroides_sp_3_1_19	0.117163	0.562888	0.019628	0.0496984	0.00260487	0.106865	0.0385705	0	0	0	0	0	0	0
k__Bacteria; p__Firmicutes; c__Erysipelotrichia; o__Erysipelotrichales; f__Erysipelotrichaceae; g__Erysipelotrichaceae_noname; s__Eubacterium_dolichum	0.0925363	0.520689	0.0252675	0.0496984	0.00249064	0.00313805	0.0319173	0	0	0	0	0	0	0
k__Bacteria; p__Firmicutes; c__Bacilli; o__Lactobacillales; f__Streptococcaceae; g__Streptococcus; s__Streptococcus_intermedius	0.874914	0.990549	0.0350002	0.0496984	0.00243782	0.0028639	0.037363	0.0039425	0	0	0	0	0.002005	0
k__Bacteria; p__Bacteroidetes; c__Bacteroidia; o__Bacteroidales; f__Porphyromonadaceae; g__Odoribacter; s__Odoribacter_laneus	0.68338	0.961322	0.0318467	0.0496984	0.00238628	0	0.0302803	0	0	0	0	0	0	0
k__Bacteria; p__Bacteroidetes; c__Bacteroidia; o__Bacteroidales; f__Porphyromonadaceae; g__Odoribacter; s__Odoribacter_unclassified	0.878957	0.990549	0.0335401	0.0496984	0.00237744	0.00118195	0.000788649	0	0	0	0	0	0	0
k__Bacteria; p__Actinobacteria; c__Actinobacteria; o__Actinomycetales; f__Actinomycetaceae; g__Actinomyces; s__Actinomyces_oris	0.0984109	0.53357	0.033617	0.0496984	0.00237141	0.00416781	0.00837	0	0.0118333	0	0	0	0	0
k__Bacteria; p__Actinobacteria; c__Actinobacteria; o__Bifidobacteriales; f__Bifidobacteriaceae; g__Scardovia; s__Scardovia_wiggsiae	0.707623	0.961473	0.0575616	0.0619011	0.00234192	0.00114732	0.165697	1.47845	0.000153333	0	0	0	0	0
k__Bacteria; p__Candidatus_Saccharibacteria; c__Candidatus_Saccharibacteria_noname; o__Candidatus_Saccharibacteria_noname; f__Candidatus_Saccharibacteria_noname; g__Candidatus_Saccharibacteria_noname; s__candidate_division_TM7_single_cell_isolate_TM7c	NA	NA	NA	NA	0.00230474	0.00029	0.0531895	0	0	0	0	0	0	0
k__Bacteria; p__Firmicutes; c__Bacilli; o__Lactobacillales; f__Lactobacillaceae; g__Lactobacillus; s__Lactobacillus_salivarius	0.342886	0.811205	0.04129	0.0498353	0.00221244	0.0615898	0.0014846	0	1.19087	0	0	0	0	0
k__Bacteria; p__Firmicutes; c__Clostridia; o__Clostridiales; f__Clostridiaceae; g__Clostridium; s__Clostridium_sp_D5	NA	NA	0.0338729	0.0496984	0.0022109	0	0	0	0	0	0	0	0	0
k__Bacteria; p__Firmicutes; c__Clostridia; o__Clostridiales; f__Clostridiaceae; g__Clostridium; s__Clostridium_celatum	NA	NA	0.0338729	0.0496984	0.00217808	0	0	0	0	0	0	0	0	0
k__Bacteria; p__Actinobacteria; c__Actinobacteria; o__Actinomycetales; f__Actinomycetaceae; g__Actinomyces; s__Actinomyces_cardiffensis	0.275787	0.770651	0.0304215	0.0496984	0.00203885	0.000900976	0.0020573	0	0	0	0	0	0	0
k__Bacteria; p__Firmicutes; c__Negativicutes; o__Selenomonadales; f__Veillonellaceae; g__Megasphaera; s__Megasphaera_micronuciformis	0.134018	0.593027	0.0628096	0.0663675	0.00201782	1.26829e-05	0.00600838	0	0.0299267	0	0	0	0	0
k__Bacteria; p__Firmicutes; c__Clostridia; o__Clostridiales; f__Eubacteriaceae; g__Anaerofustis; s__Anaerofustis_stercorihominis	0.210242	0.707688	0.0348295	0.0496984	0.00197256	0.00679976	0.00105676	0	0	0	0	0	0	0
k__Bacteria; p__Actinobacteria; c__Actinobacteria; o__Actinomycetales; f__Actinomycetaceae; g__Actinomyces; s__Actinomyces_sp_ICM47	0.965328	0.990549	0.0339344	0.0496984	0.00184692	0.0120988	0.0131224	0	0.05013	0	0	0	0	0
k__Bacteria; p__Firmicutes; c__Clostridia; o__Clostridiales; f__Clostridiales_Family_XI_Incertae_Sedis; g__Anaerococcus; s__Anaerococcus_lactolyticus	NA	NA	0.0338729	0.0496984	0.00184321	0	0	0	0	0	0	0	0	0
k__Bacteria; p__Firmicutes; c__Clostridia; o__Clostridiales; f__Clostridiales_Family_XIII_Incertae_Sedis; g__Clostridiales_Family_XIII_Incertae_Sedis_noname; s__Eubacterium_infirmum	0.189417	0.673683	0.0365758	0.0496984	0.00181115	2.21951e-05	6.48649e-06	0	0.000903333	0	0	0	0	0
k__Bacteria; p__Firmicutes; c__Clostridia; o__Clostridiales; f__Eubacteriaceae; g__Eubacterium; s__Eubacterium_saphenum	NA	NA	NA	NA	0.00179039	0.000312439	0.00497703	0	0	0	0	0	0	0
k__Bacteria; p__Fusobacteria; c__Fusobacteriia; o__Fusobacteriales; f__Fusobacteriaceae; g__Fusobacterium; s__Fusobacterium_ulcerans	NA	NA	NA	NA	0.00177718	0.026831	0.0484792	0	0	0	0	0	0	0
k__Bacteria; p__Firmicutes; c__Bacilli; o__Lactobacillales; f__Leuconostocaceae; g__Leuconostoc; s__Leuconostoc_citreum	0.613594	0.900162	0.03402	0.0496984	0.00172962	0	0.00352081	0.57218	0	0	0	0	0	0
k__Bacteria; p__Actinobacteria; c__Actinobacteria; o__Coriobacteriales; f__Coriobacteriaceae; g__Atopobium; s__Atopobium_sp_ICM58	NA	NA	0.0338729	0.0496984	0.00167487	0	0	0	0	0	0	0	0	0
k__Bacteria; p__Firmicutes; c__Clostridia; o__Clostridiales; f__Clostridiaceae; g__Clostridium; s__Clostridium_perfringens	0.426036	0.84092	0.0411373	0.0498353	0.00144397	0.00061439	0.00290703	0	0	0	0	0	0	0
k__Bacteria; p__Firmicutes; c__Bacilli; o__Lactobacillales; f__Streptococcaceae; g__Streptococcus; s__Streptococcus_constellatus	0.518445	0.849477	0.0442331	0.0519299	0.00143769	0.00196415	0.0320003	0.0047775	0.00492333	0	0	0	0.0037	0
k__Bacteria; p__Firmicutes; c__Bacilli; o__Lactobacillales; f__Streptococcaceae; g__Streptococcus; s__Streptococcus_mutans	0.960913	0.990549	0.0339022	0.0496984	0.00142526	0.0145478	0.0515127	0	0.0147033	0	0	0	0	0
k__Bacteria; p__Firmicutes; c__Bacilli; o__Lactobacillales; f__Leuconostocaceae; g__Leuconostoc; s__Leuconostoc_gelidum	0.506514	0.849477	0.0318865	0.0496984	0.00140308	0.000349756	0.000371892	0.0056925	0	0	0	0	0	0
k__Bacteria; p__Firmicutes; c__Bacilli; o__Lactobacillales; f__Lactobacillaceae; g__Lactobacillus; s__Lactobacillus_gasseri	0.366922	0.811205	0.0296093	0.0496984	0.0014	0.00109268	0.00571	0	0.00042	0	0	0	0	0
k__Bacteria; p__Firmicutes; c__Clostridia; o__Clostridiales; f__Lachnospiraceae; g__Lachnospiraceae_noname; s__Lachnospiraceae_bacterium_6_1_63FAA	0.864432	0.990549	0.0322029	0.0496984	0.00138141	0.0684029	0.00133378	0	0	0	0	0	0	0
k__Bacteria; p__Actinobacteria; c__Actinobacteria; o__Bifidobacteriales; f__Bifidobacteriaceae; g__Bifidobacterium; s__Bifidobacterium_breve	0.101902	0.53357	0.0213318	0.0496984	0.00136397	0.0643966	0.00151703	0	0	0	0	0	0	0
k__Bacteria; p__Firmicutes; c__Bacilli; o__Bacillales; f__Bacillales_noname; g__Gemella; s__Gemella_haemolysans	0.741258	0.970327	0.0320882	0.0496984	0.00133179	0.00570341	0.000724324	3.5245	0.000476667	0	0	0	0	0
k__Bacteria; p__Actinobacteria; c__Actinobacteria; o__Coriobacteriales; f__Coriobacteriaceae; g__Atopobium; s__Atopobium_vaginae	0.620669	0.900162	0.0382986	0.0496984	0.00132513	0	0.0171943	0.0131575	0	0	0	0	0	0
k__Bacteria; p__Firmicutes; c__Clostridia; o__Clostridiales; f__Clostridiaceae; g__Clostridium; s__Clostridium_scindens	0.646881	0.923765	0.0429543	0.0511421	0.00130474	0.000202439	0.00244405	0	0.00068	0	0	0	0	0
k__Bacteria; p__Firmicutes; c__Bacilli; o__Lactobacillales; f__Lactobacillaceae; g__Pediococcus; s__Pediococcus_unclassified	NA	NA	0.0338729	0.0496984	0.00122026	0	0	0	0	0	0	0	0	0
k__Bacteria; p__Actinobacteria; c__Actinobacteria; o__Coriobacteriales; f__Coriobacteriaceae; g__Olsenella; s__Olsenella_uli	0.279239	0.770794	0.0478906	0.0545898	0.00120077	0.000405366	0.871677	0.159455	0.0581767	0	0	0	0.011815	0
k__Bacteria; p__Bacteroidetes; c__Bacteroidia; o__Bacteroidales; f__Prevotellaceae; g__Prevotella; s__Prevotella_bivia	0.171486	0.653033	0.0316805	0.0496984	0.00117026	0	0.0254905	0	0	0	0	0	0	0
k__Bacteria; p__Firmicutes; c__Clostridia; o__Clostridiales; f__Lachnospiraceae; g__Lachnospiraceae_noname; s__Lachnospiraceae_bacterium_4_1_37FAA	0.623189	0.900162	0.0319675	0.0496984	0.0011359	0.00504098	0.000173243	0	0.0170167	0	0	0	0	0
k__Bacteria; p__Firmicutes; c__Bacilli; o__Lactobacillales; f__Lactobacillaceae; g__Lactobacillus; s__Lactobacillus_fermentum	0.476779	0.849477	0.0337632	0.0496984	0.00112808	0.00428	0.0127205	0.01661	0	0	0	0	0	0
k__Bacteria; p__Actinobacteria; c__Actinobacteria; o__Coriobacteriales; f__Coriobacteriaceae; g__Slackia; s__Slackia_unclassified	0.136852	0.593027	0.0659324	0.0693649	0.00110372	6.7561e-05	0.0120595	0.0112525	0.00496	0	0	0	0.007135	0
k__Bacteria; p__Firmicutes; c__Bacilli; o__Lactobacillales; f__Streptococcaceae; g__Streptococcus; s__Streptococcus_oligofermentans	0.739386	0.970327	0.0326389	0.0496984	0.00110256	8.09756e-05	0.00191162	0	0	0	0	0	0	0
k__Bacteria; p__Firmicutes; c__Bacilli; o__Lactobacillales; f__Streptococcaceae; g__Streptococcus; s__Streptococcus_agalactiae	0.399533	0.818925	0.0312685	0.0496984	0.0010859	0	7.83784e-06	0	0	0	0	0	0	0
k__Bacteria; p__Firmicutes; c__Clostridia; o__Clostridiales; f__Clostridiales_Family_XI_Incertae_Sedis; g__Parvimonas; s__Parvimonas_micra	0.519715	0.849477	0.0404051	0.0496984	0.00105039	0.00856366	0.0478316	0.0038225	0.001	0	0	0	0.001545	0
k__Bacteria; p__Actinobacteria; c__Actinobacteria; o__Coriobacteriales; f__Coriobacteriaceae; g__Atopobium; s__Atopobium_rimae	0.43113	0.842685	0.0613428	0.065244	0.0010118	0.000552683	0.0214451	0.26889	0.0132833	0	0	0	0	0
k__Bacteria; p__Firmicutes; c__Clostridia; o__Clostridiales; f__Peptostreptococcaceae; g__Peptostreptococcus; s__Peptostreptococcus_unclassified	0.232737	0.725139	0.0677653	0.0708322	0.000979872	0.000283415	0.0757943	0.00092	0	0	0	0	0	0
k__Bacteria; p__Firmicutes; c__Bacilli; o__Lactobacillales; f__Lactobacillaceae; g__Lactobacillus; s__Lactobacillus_plantarum	0.811219	0.990549	0.0375621	0.0496984	0.00095859	0.0156507	0.00066946	0.0610525	0	0	0	0	0	0
k__Bacteria; p__Fusobacteria; c__Fusobacteriia; o__Fusobacteriales; f__Fusobacteriaceae; g__Fusobacterium; s__Fusobacterium_varium	NA	NA	NA	NA	0.000921154	0.380151	0.08418	0	0	0	0	0	0	0
k__Bacteria; p__Firmicutes; c__Bacilli; o__Lactobacillales; f__Streptococcaceae; g__Streptococcus; s__Streptococcus_tigurinus	0.567107	0.872651	0.0388899	0.0496984	0.000853205	0.00150244	0.00184108	0	0.00200667	0	0	0	0	0
k__Bacteria; p__Proteobacteria; c__Gammaproteobacteria; o__Enterobacteriales; f__Enterobacteriaceae; g__Escherichia; s__Escherichia_albertii	NA	NA	0.0338729	0.0496984	0.000820256	0	0	0	0	0	0	0	0	0
k__Bacteria; p__Candidatus_Saccharibacteria; c__Candidatus_Saccharibacteria_noname; o__Candidatus_Saccharibacteria_noname; f__Candidatus_Saccharibacteria_noname; g__Candidatus_Saccharibacteria_noname; s__candidate_division_TM7_single_cell_isolate_TM7b	NA	NA	NA	NA	0.000800641	9.51219e-05	0.0318854	0	0	0	0	0	0	0
k__Bacteria; p__Proteobacteria; c__Gammaproteobacteria; o__Enterobacteriales; f__Enterobacteriaceae; g__Proteus; s__Proteus_mirabilis	NA	NA	0.0338729	0.0496984	0.000748846	0	0	0	0	0	0	0	0	0
k__Bacteria; p__Actinobacteria; c__Actinobacteria; o__Bifidobacteriales; f__Bifidobacteriaceae; g__Scardovia; s__Scardovia_unclassified	NA	NA	NA	NA	0.00068218	0.000694634	0.000811892	0	0	0	0	0	0	0
k__Bacteria; p__Actinobacteria; c__Actinobacteria; o__Coriobacteriales; f__Coriobacteriaceae; g__Collinsella; s__Collinsella_unclassified	0.578615	0.87565	0.0311007	0.0496984	0.000662949	0.00444634	0.0763722	0	0.0162667	0	0	0	0	0
k__Bacteria; p__Firmicutes; c__Bacilli; o__Lactobacillales; f__Streptococcaceae; g__Streptococcus; s__Streptococcus_parauberis	0.63912	0.916153	0.0353109	0.0496984	0.000658333	0.00017439	0	0.0808075	0	0	0	0	0	0
k__Bacteria; p__Firmicutes; c__Bacilli; o__Lactobacillales; f__Lactobacillaceae; g__Pediococcus; s__Pediococcus_lolii	NA	NA	0.0338729	0.0496984	0.000652179	0	0	0	0	0	0	0	0	0
k__Bacteria; p__Firmicutes; c__Bacilli; o__Lactobacillales; f__Enterococcaceae; g__Enterococcus; s__Enterococcus_hirae	NA	NA	0.0338729	0.0496984	0.000651026	0	0	0	0	0	0	0	0	0
k__Bacteria; p__Firmicutes; c__Clostridia; o__Clostridiales; f__Peptostreptococcaceae; g__Peptostreptococcus; s__Peptostreptococcus_anaerobius	0.373586	0.811205	0.0370657	0.0496984	0.000630769	0.0154137	5.59459e-05	0	0	0	0	0	0	0
k__Bacteria; p__Firmicutes; c__Bacilli; o__Lactobacillales; f__Lactobacillaceae; g__Lactobacillus; s__Lactobacillus_rhamnosus	0.355378	0.811205	0.0315063	0.0496984	0.000628205	0.00230122	0.00408405	0	0.226287	0	0	0	0	0
k__Bacteria; p__Bacteroidetes; c__Bacteroidia; o__Bacteroidales; f__Prevotellaceae; g__Prevotella; s__Prevotella_buccalis	0.420598	0.836884	0.031214	0.0496984	0.000619744	0	0.00069054	0	0	0	0	0	0	0
k__Bacteria; p__Firmicutes; c__Clostridia; o__Clostridiales; f__Clostridiales_Family_XI_Incertae_Sedis; g__Peptoniphilus; s__Peptoniphilus_lacrimalis	0.82465	0.990549	0.0361662	0.0496984	0.000613974	0.00611683	0	0	0.00365333	0	0	0	0	0
k__Bacteria; p__Firmicutes; c__Bacilli; o__Lactobacillales; f__Streptococcaceae; g__Streptococcus; s__Streptococcus_sobrinus	0.986448	0.990549	0.0353444	0.0496984	0.000586795	0	0.00146081	0	0	0	0	0	0	0
k__Bacteria; p__Firmicutes; c__Clostridia; o__Clostridiales; f__Clostridiaceae; g__Clostridium; s__Clostridium_hylemonae	0.492717	0.849477	0.0305919	0.0496984	0.000552692	0.00131439	0.00342946	0	0	0	0	0	0	0
k__Bacteria; p__Firmicutes; c__Bacilli; o__Lactobacillales; f__Carnobacteriaceae; g__Carnobacterium; s__Carnobacterium_maltaromaticum	0.967691	0.990549	0.0347136	0.0496984	0.00052	0	0.00326865	0.0338925	0	0	0	0	0	0
k__Bacteria; p__Firmicutes; c__Negativicutes; o__Selenomonadales; f__Acidaminococcaceae; g__Acidaminococcus; s__Acidaminococcus_fermentans	NA	NA	NA	NA	0.00051141	0.0182581	0.00020027	0	0	0	0	0	0	0
k__Bacteria; p__Firmicutes; c__Bacilli; o__Lactobacillales; f__Lactobacillaceae; g__Lactobacillus; s__Lactobacillus_rossiae	0.52266	0.849477	0.0364869	0.0496984	0.000482308	0	0	0.068955	0	0	0	0	0	0
k__Bacteria; p__Firmicutes; c__Bacilli; o__Lactobacillales; f__Lactobacillaceae; g__Pediococcus; s__Pediococcus_acidilactici	NA	NA	0.0338729	0.0496984	0.000465	0	0	0	0	0	0	0	0	0
k__Bacteria; p__Actinobacteria; c__Actinobacteria; o__Actinomycetales; f__Micrococcaceae; g__Rothia; s__Rothia_unclassified	0.169121	0.650598	0.022774	0.0496984	0.000462821	3.90244e-05	0.000204595	0	0	0	0	0	0	0
k__Bacteria; p__Bacteroidetes; c__Bacteroidia; o__Bacteroidales; f__Porphyromonadaceae; g__Porphyromonas; s__Porphyromonas_bennonis	NA	NA	NA	NA	0.000462692	0.000142927	0.000853243	0	0	0	0	0	0	0
k__Bacteria; p__Firmicutes; c__Clostridia; o__Clostridiales; f__Clostridiales_noname; g__Pseudoflavonifractor; s__Pseudoflavonifractor_capillosus	0.18726	0.673683	0.0357653	0.0496984	0.00044782	0.000297805	0.00134973	0	0	0	0	0	0	0
k__Bacteria; p__Firmicutes; c__Bacilli; o__Lactobacillales; f__Enterococcaceae; g__Enterococcus; s__Enterococcus_mundtii	NA	NA	0.0338729	0.0496984	0.000387051	0	0	0	0	0	0	0	0	0
k__Bacteria; p__Firmicutes; c__Clostridia; o__Clostridiales; f__Peptostreptococcaceae; g__Peptostreptococcaceae_noname; s__Clostridium_bifermentans	NA	NA	0.0338729	0.0496984	0.000372564	0	0	0	0	0	0	0	0	0
k__Bacteria; p__Firmicutes; c__Bacilli; o__Lactobacillales; f__Streptococcaceae; g__Streptococcus; s__Streptococcus_macedonicus	0.306554	0.802575	0.0323821	0.0496984	0.00036641	0.000426829	9.45946e-05	0	0	0	0	0	0	0
k__Bacteria; p__Fusobacteria; c__Fusobacteriia; o__Fusobacteriales; f__Fusobacteriaceae; g__Fusobacterium; s__Fusobacterium_nucleatum	0.363174	0.811205	0.0371119	0.0496984	0.00034	0.00208366	1.35135e-05	0	0	0	0	0	0	0
k__Bacteria; p__Proteobacteria; c__Gammaproteobacteria; o__Enterobacteriales; f__Enterobacteriaceae; g__Raoultella; s__Raoultella_ornithinolytica	0.29048	0.774617	0.0333398	0.0496984	0.000338333	0.240044	0.000833513	0	0	0	0	0	0	0
k__Bacteria; p__Firmicutes; c__Bacilli; o__Bacillales; f__Staphylococcaceae; g__Macrococcus; s__Macrococcus_caseolyticus	NA	NA	0.0338729	0.0496984	0.000311154	0	0	0	0	0	0	0	0	0
k__Bacteria; p__Firmicutes; c__Clostridia; o__Clostridiales; f__Clostridiaceae; g__Clostridium; s__Clostridium_methylpentosum	0.751406	0.976827	0.0374192	0.0496984	0.000308333	0	0.035027	0	0.0158767	0	0	0	0	0
k__Bacteria; p__Firmicutes; c__Negativicutes; o__Selenomonadales; f__Veillonellaceae; g__Dialister; s__Dialister_micraerophilus	NA	NA	0.0338729	0.0496984	0.000280385	0	0	0	0	0	0	0	0	0
k__Bacteria; p__Synergistetes; c__Synergistia; o__Synergistales; f__Synergistaceae; g__Pyramidobacter; s__Pyramidobacter_piscolens	NA	NA	0.0338729	0.0496984	0.000266154	0	0	0	0	0	0	0	0	0
k__Bacteria; p__Firmicutes; c__Bacilli; o__Lactobacillales; f__Lactobacillaceae; g__Lactobacillus; s__Lactobacillus_curvatus	0.90581	0.990549	0.0339432	0.0496984	0.000261667	0.00155219	0	0.210872	0	0	0	0	0	0
k__Bacteria; p__Firmicutes; c__Erysipelotrichia; o__Erysipelotrichales; f__Erysipelotrichaceae; g__Erysipelotrichaceae_noname; s__Erysipelotrichaceae_bacterium_5_2_54FAA	0.539831	0.864957	0.0327316	0.0496984	0.000258461	0.00750732	0.00104513	0.000305	0	0	0	0	0	0
k__Bacteria; p__Proteobacteria; c__Gammaproteobacteria; o__Enterobacteriales; f__Enterobacteriaceae; g__Shigella; s__Shigella_sonnei	0.800822	0.990549	0.0330551	0.0496984	0.000258205	0	0.00754892	0	0	0	0	0	0	0
k__Bacteria; p__Firmicutes; c__Clostridia; o__Clostridiales; f__Lachnospiraceae; g__Oribacterium; s__Oribacterium_sinus	0.767837	0.990549	0.0375959	0.0496984	0.000235256	0.000169268	0.0978019	0.0504	0	0	0	0	0	0
k__Bacteria; p__Firmicutes; c__Bacilli; o__Lactobacillales; f__Lactobacillaceae; g__Lactobacillus; s__Lactobacillus_animalis	NA	NA	0.0338729	0.0496984	0.000220256	0	0	0	0	0	0	0	0	0
k__Bacteria; p__Actinobacteria; c__Actinobacteria; o__Actinomycetales; f__Dermabacteraceae; g__Brachybacterium; s__Brachybacterium_squillarum	NA	NA	0.0338729	0.0496984	0.000206538	0	0	0	0	0	0	0	0	0
k__Bacteria; p__Firmicutes; c__Bacilli; o__Bacillales; f__Staphylococcaceae; g__Staphylococcus; s__Staphylococcus_xylosus	NA	NA	0.0338729	0.0496984	0.00019859	0	0	0	0	0	0	0	0	0
k__Bacteria; p__Firmicutes; c__Bacilli; o__Lactobacillales; f__Enterococcaceae; g__Enterococcus; s__Enterococcus_gallinarum	0.62105	0.900162	0.0443278	0.0519299	0.000197051	0.00248342	0.000772973	0	0.03647	0	0	0	0	0
k__Bacteria; p__Actinobacteria; c__Actinobacteria; o__Coriobacteriales; f__Coriobacteriaceae; g__Olsenella; s__Olsenella_profusa	0.104204	0.538151	0.0721237	0.0750643	0.000186923	0	0.0109686	0.0368975	0.00684333	0	0	0	0	0
k__Bacteria; p__Proteobacteria; c__Alphaproteobacteria; o__Rhodobacterales; f__Rhodobacteraceae; g__Paracoccus; s__Paracoccus_unclassified	NA	NA	0.0338729	0.0496984	0.000177821	0	0	0	0	0	0	0	0	0
k__Bacteria; p__Firmicutes; c__Clostridia; o__Clostridiales; f__Clostridiales_Family_XI_Incertae_Sedis; g__Finegoldia; s__Finegoldia_magna	NA	NA	NA	NA	0.000175641	0.00215024	0.00244351	0	0	0	0	0	0	0
k__Bacteria; p__Firmicutes; c__Bacilli; o__Lactobacillales; f__Streptococcaceae; g__Streptococcus; s__Streptococcus_peroris	0.253385	0.754043	0.0329581	0.0496984	0.000158461	0.00166683	0.000447568	0	0	0	0	0	0	0
k__Bacteria; p__Actinobacteria; c__Actinobacteria; o__Coriobacteriales; f__Coriobacteriaceae; g__Slackia; s__Slackia_exigua	0.260396	0.766359	0.0485563	0.0548174	0.000158333	0	0.00883513	0.0019575	0.00216	0	0	0	0	0
k__Bacteria; p__Actinobacteria; c__Actinobacteria; o__Actinomycetales; f__Micrococcaceae; g__Rothia; s__Rothia_aeria	0.186008	0.673683	0.0864547	0.0888358	0.00015	0.000109024	0.0787532	0.0027875	0.0179567	0	0	0	0	0
k__Bacteria; p__Fusobacteria; c__Fusobacteriia; o__Fusobacteriales; f__Fusobacteriaceae; g__Fusobacterium; s__Fusobacterium_mortiferum	NA	NA	NA	NA	0.000146282	0.0434632	0.252883	0	0	0	0	0	0	0
k__Bacteria; p__Firmicutes; c__Bacilli; o__Lactobacillales; f__Enterococcaceae; g__Enterococcus; s__Enterococcus_casseliflavus	NA	NA	0.0338729	0.0496984	0.000144744	0	0	0	0	0	0	0	0	0
k__Bacteria; p__Actinobacteria; c__Actinobacteria; o__Actinomycetales; f__Micrococcaceae; g__Kocuria; s__Kocuria_rhizophila	0.399688	0.818925	0.0312686	0.0496984	0.000143333	0	0.000229189	0	0	0	0	0	0	0
k__Bacteria; p__Actinobacteria; c__Actinobacteria; o__Bifidobacteriales; f__Bifidobacteriaceae; g__Parascardovia; s__Parascardovia_denticolens	0.704578	0.961473	0.0425698	0.0508531	0.000141026	0.000892683	0.00275432	0.0090125	0.01106	0	0	0	0	0
k__Bacteria; p__Proteobacteria; c__Gammaproteobacteria; o__Enterobacteriales; f__Enterobacteriaceae; g__Klebsiella; s__Klebsiella_variicola	NA	NA	0.0338729	0.0496984	0.000136795	0	0	0	0	0	0	0	0	0
k__Bacteria; p__Firmicutes; c__Bacilli; o__Lactobacillales; f__Leuconostocaceae; g__Leuconostoc; s__Leuconostoc_gasicomitatum	0.522888	0.849477	0.0365143	0.0496984	0.000130769	0	0	0.0043225	0	0	0	0	0	0
k__Bacteria; p__Firmicutes; c__Bacilli; o__Bacillales; f__Bacillaceae; g__Bacillus; s__Bacillus_amyloliquefaciens	NA	NA	0.0338729	0.0496984	0.000129231	0	0	0	0	0	0	0	0	0
k__Bacteria; p__Bacteroidetes; c__Bacteroidia; o__Bacteroidales; f__Prevotellaceae; g__Prevotella; s__Prevotella_salivae	0.523472	0.849477	0.0365315	0.0496984	0.000115128	0	0	0.0023275	0	0	0	0	0	0
k__Bacteria; p__Firmicutes; c__Bacilli; o__Lactobacillales; f__Leuconostocaceae; g__Weissella; s__Weissella_halotolerans	NA	NA	0.0338729	0.0496984	0.000112821	0	0	0	0	0	0	0	0	0
k__Bacteria; p__Proteobacteria; c__Gammaproteobacteria; o__Enterobacteriales; f__Enterobacteriaceae; g__Enterobacteriaceae_noname; s__Enterobacteriaceae_bacterium_9_2_54FAA	NA	NA	0.0338729	0.0496984	0.000108205	0	0	0	0	0	0	0	0	0
k__Bacteria; p__Proteobacteria; c__Gammaproteobacteria; o__Enterobacteriales; f__Enterobacteriaceae; g__Hafnia; s__Hafnia_alvei	NA	NA	0.0338729	0.0496984	0.00010718	0	0	0	0	0	0	0	0	0
k__Bacteria; p__Actinobacteria; c__Actinobacteria; o__Actinomycetales; f__Micrococcaceae; g__Kocuria; s__Kocuria_unclassified	0.552914	0.87217	0.0296852	0.0496984	0.000105769	0	0.000342703	0	0	0	0	0	0	0
k__Bacteria; p__Firmicutes; c__Bacilli; o__Lactobacillales; f__Enterococcaceae; g__Enterococcus; s__Enterococcus_asini	NA	NA	0.0338729	0.0496984	0.000104615	0	0	0	0	0	0	0	0	0
k__Bacteria; p__Firmicutes; c__Bacilli; o__Lactobacillales; f__Lactobacillaceae; g__Lactobacillus; s__Lactobacillus_oris	NA	NA	0.0338729	0.0496984	9.65385e-05	0	0	0	0	0	0	0	0	0
k__Bacteria; p__Actinobacteria; c__Actinobacteria; o__Actinomycetales; f__Actinomycetaceae; g__Varibaculum; s__Varibaculum_cambriense	0.936617	0.990549	0.0339672	0.0496984	8.14103e-05	0.0286644	4.24324e-05	0	0.00217667	0	0	0	0	0
k__Bacteria; p__Firmicutes; c__Bacilli; o__Lactobacillales; f__Carnobacteriaceae; g__Granulicatella; s__Granulicatella_elegans	NA	NA	NA	NA	8.0641e-05	3.53659e-05	0.023127	0	0	0	0	0	0	0
k__Bacteria; p__Proteobacteria; c__Gammaproteobacteria; o__Enterobacteriales; f__Enterobacteriaceae; g__Morganella; s__Morganella_morganii	0.399685	0.818925	0.0312777	0.0496984	7.89744e-05	0	0.000107838	0	0	0	0	0	0	0
k__Bacteria; p__Actinobacteria; c__Actinobacteria; o__Actinomycetales; f__Actinomycetaceae; g__Mobiluncus; s__Mobiluncus_curtisii	NA	NA	0.0338729	0.0496984	6.33333e-05	0	0	0	0	0	0	0	0	0
k__Bacteria; p__Proteobacteria; c__Gammaproteobacteria; o__Aeromonadales; f__Succinivibrionaceae; g__Succinatimonas; s__Succinatimonas_hippei	0.101743	0.53357	0.0207251	0.0496984	6.23077e-05	0	0.00502324	0	0	0	0	0	0	0
k__Bacteria; p__Firmicutes; c__Clostridia; o__Clostridiales; f__Ruminococcaceae; g__Subdoligranulum; s__Subdoligranulum_variabile	0.142153	0.595464	0.02723	0.0496984	6.05128e-05	0	0.00179027	0	0	0	0	0	0	0
k__Bacteria; p__Actinobacteria; c__Actinobacteria; o__Actinomycetales; f__Actinomycetaceae; g__Actinomyces; s__Actinomyces_georgiae	0.0773186	0.448448	0.048601	0.0548174	5.1282e-05	0	1.97297e-05	0	0.00130667	0	0	0	0	0
k__Bacteria; p__Firmicutes; c__Clostridia; o__Clostridiales; f__Lachnospiraceae; g__Shuttleworthia; s__Shuttleworthia_satelles	0.224119	0.7234	0.050556	0.0566131	5.0641e-05	0	0.00421297	0.0049975	0.00168	0	0	0	0	0
k__Bacteria; p__Actinobacteria; c__Actinobacteria; o__Actinomycetales; f__Corynebacteriaceae; g__Corynebacterium; s__Corynebacterium_accolens	0.345809	0.811205	0.0447752	0.0523277	4.87179e-05	2.12195e-05	0.00131811	0	0.000953333	0	0	0	0	0
k__Bacteria; p__Actinobacteria; c__Actinobacteria; o__Coriobacteriales; f__Coriobacteriaceae; g__Cryptobacterium; s__Cryptobacterium_curtum	0.322231	0.811205	0.0555988	0.060245	4.79487e-05	0	0.00361568	0.0071175	0.00382333	0	0	0	0	0
k__Bacteria; p__Firmicutes; c__Bacilli; o__Lactobacillales; f__Enterococcaceae; g__Tetragenococcus; s__Tetragenococcus_halophilus	NA	NA	0.0338729	0.0496984	4.65385e-05	0	0	0	0	0	0	0	0	0
k__Bacteria; p__Firmicutes; c__Bacilli; o__Lactobacillales; f__Streptococcaceae; g__Streptococcus; s__Streptococcus_dysgalactiae	0.142024	0.595464	0.0271727	0.0496984	3.5641e-05	0	0.000683784	0	0	0	0	0	0	0
k__Bacteria; p__Bacteroidetes; c__Bacteroidia; o__Bacteroidales; f__Porphyromonadaceae; g__Butyricimonas; s__Butyricimonas_synergistica	0.79417	0.990549	0.0327173	0.0496984	3.53846e-05	0.00127707	0	0.00119	0.000123333	0	0	0	0	0
k__Bacteria; p__Firmicutes; c__Bacilli; o__Lactobacillales; f__Streptococcaceae; g__Streptococcus; s__Streptococcus_pseudopneumoniae	NA	NA	0.0338729	0.0496984	2.51282e-05	0	0	0	0	0	0	0	0	0
k__Bacteria; p__Actinobacteria; c__Actinobacteria; o__Actinomycetales; f__Corynebacteriaceae; g__Corynebacterium; s__Corynebacterium_matruchotii	0.987922	0.990549	0.0354219	0.0496984	2e-05	0	0.00175568	0	0	0	0	0	0	0
k__Bacteria; p__Actinobacteria; c__Actinobacteria; o__Bifidobacteriales; f__Bifidobacteriaceae; g__Bifidobacterium; s__Bifidobacterium_pseudolongum	NA	NA	0.0338729	0.0496984	1.96154e-05	0	0	0	0	0	0	0	0	0
k__Bacteria; p__Proteobacteria; c__Alphaproteobacteria; o__Rhodobacterales; f__Rhodobacteraceae; g__Paracoccus; s__Paracoccus_denitrificans	NA	NA	0.0338729	0.0496984	1.83333e-05	0	0	0	0	0	0	0	0	0
k__Bacteria; p__Proteobacteria; c__Gammaproteobacteria; o__Pasteurellales; f__Pasteurellaceae; g__Haemophilus; s__Haemophilus_sputorum	NA	NA	0.0338729	0.0496984	1.30769e-05	0	0	0	0	0	0	0	0	0
k__Bacteria; p__Firmicutes; c__Bacilli; o__Lactobacillales; f__Leuconostocaceae; g__Weissella; s__Weissella_paramesenteroides	0.523592	0.849477	0.036585	0.0496984	1.21795e-05	0	0	0.14148	0	0	0	0	0	0
k__Bacteria; p__Bacteroidetes; c__Bacteroidia; o__Bacteroidales; f__Bacteroidaceae; g__Bacteroides; s__Bacteroides_fluxus	0.736769	0.970327	0.0452487	0.0526382	6.41026e-06	0	0.00824216	0	0	0	0	0	0	0
k__Bacteria; p__Actinobacteria; c__Actinobacteria; o__Actinomycetales; f__Actinomycetales_noname; g__Tropheryma; s__Tropheryma_whipplei	NA	NA	0.0338729	0.0496984	4.23077e-06	0	0	0	0	0	0	0	0	0
k__Bacteria; p__Firmicutes; c__Bacilli; o__Bacillales; f__Staphylococcaceae; g__Staphylococcus; s__Staphylococcus_warneri	0.399623	0.818925	0.0312353	0.0496984	3.71795e-06	0	0.00394216	0	0	0	0	0	0	0
k__Bacteria; p__Actinobacteria; c__Actinobacteria; o__Actinomycetales; f__Dermabacteraceae; g__Brachybacterium; s__Brachybacterium_unclassified	NA	NA	0.0338729	0.0496984	2.05128e-06	0	0	0	0	0	0	0	0	0
k__Bacteria; p__Actinobacteria; c__Actinobacteria; o__Actinomycetales; f__Actinomycetaceae; g__Actinobaculum; s__Actinobaculum_schaalii	0.986307	0.990549	0.0353546	0.0496984	0	0	0.00799432	0	0	0	0	0	0	0
k__Bacteria; p__Actinobacteria; c__Actinobacteria; o__Actinomycetales; f__Actinomycetaceae; g__Actinobaculum; s__Actinobaculum_sp_oral_taxon_183	0.18795	0.673683	0.0495519	0.0557603	0	0	0.0229176	0	0.05527	0	0	0	0	0
k__Bacteria; p__Actinobacteria; c__Actinobacteria; o__Actinomycetales; f__Actinomycetaceae; g__Actinomyces; s__Actinomyces_neuii	NA	NA	0.0338729	0.0496984	0	0	0	0	0	0	0	0	0	0
k__Bacteria; p__Actinobacteria; c__Actinobacteria; o__Actinomycetales; f__Actinomycetaceae; g__Actinomyces; s__Actinomyces_sp_ICM39	0.690826	0.961473	0.0319951	0.0496984	0	0.00449927	0.00882513	0	0	0	0	0	0	0
k__Bacteria; p__Actinobacteria; c__Actinobacteria; o__Actinomycetales; f__Actinomycetaceae; g__Actinomyces; s__Actinomyces_sp_oral_taxon_180	NA	NA	0.0338729	0.0496984	0	0	0	0	0	0	0	0	0	0
k__Bacteria; p__Actinobacteria; c__Actinobacteria; o__Actinomycetales; f__Actinomycetaceae; g__Actinomyces; s__Actinomyces_sp_oral_taxon_448	NA	NA	0.0338729	0.0496984	0	0	0	0	0	0	0	0	0	0
k__Bacteria; p__Actinobacteria; c__Actinobacteria; o__Actinomycetales; f__Actinomycetaceae; g__Actinomyces; s__Actinomyces_sp_oral_taxon_848	NA	NA	0.0338729	0.0496984	0	0	0	0	0	0	0	0	0	0
k__Bacteria; p__Actinobacteria; c__Actinobacteria; o__Actinomycetales; f__Actinomycetaceae; g__Actinomyces; s__Actinomyces_sp_ph3	0.98635	0.990549	0.0354308	0.0496984	0	0	0.0957714	0	0	0	0	0	0	0
k__Bacteria; p__Actinobacteria; c__Actinobacteria; o__Actinomycetales; f__Corynebacteriaceae; g__Corynebacterium; s__Corynebacterium_glucuronolyticum	NA	NA	0.0338729	0.0496984	0	0	0	0	0	0	0	0	0	0
k__Bacteria; p__Actinobacteria; c__Actinobacteria; o__Actinomycetales; f__Corynebacteriaceae; g__Corynebacterium; s__Corynebacterium_jeikeium	NA	NA	0.0338729	0.0496984	0	0	0	0	0	0	0	0	0	0
k__Bacteria; p__Actinobacteria; c__Actinobacteria; o__Actinomycetales; f__Corynebacteriaceae; g__Corynebacterium; s__Corynebacterium_kroppenstedtii	0.985682	0.990549	0.0354232	0.0496984	0	0	3.51351e-05	0	0	0	0	0	0	0
k__Bacteria; p__Actinobacteria; c__Actinobacteria; o__Actinomycetales; f__Corynebacteriaceae; g__Corynebacterium; s__Corynebacterium_pseudogenitalium	0.986155	0.990549	0.0354316	0.0496984	0	0	3.67568e-05	0	0	0	0	0	0	0
k__Bacteria; p__Actinobacteria; c__Actinobacteria; o__Actinomycetales; f__Corynebacteriaceae; g__Corynebacterium; s__Corynebacterium_pyruviciproducens	NA	NA	0.0338729	0.0496984	0	0	0	0	0	0	0	0	0	0
k__Bacteria; p__Actinobacteria; c__Actinobacteria; o__Actinomycetales; f__Corynebacteriaceae; g__Corynebacterium; s__Corynebacterium_tuberculostearicum	NA	NA	0.0338729	0.0496984	0	0	0	0	0	0	0	0	0	0
k__Bacteria; p__Actinobacteria; c__Actinobacteria; o__Actinomycetales; f__Corynebacteriaceae; g__Corynebacterium; s__Corynebacterium_variabile	NA	NA	0.0338729	0.0496984	0	0	0	0	0	0	0	0	0	0
k__Bacteria; p__Actinobacteria; c__Actinobacteria; o__Actinomycetales; f__Nocardiaceae; g__Rhodococcus; s__Rhodococcus_erythropolis	0.522877	0.849477	0.0365228	0.0496984	0	0	0	0.000915	0	0	0	0	0	0
k__Bacteria; p__Actinobacteria; c__Actinobacteria; o__Actinomycetales; f__Propionibacteriaceae; g__Propionibacterium; s__Propionibacterium_acnes	0.622995	0.900162	0.0401765	0.0496984	0	0	0.00159568	0.00966	0	0	0	0	0	0
k__Bacteria; p__Actinobacteria; c__Actinobacteria; o__Actinomycetales; f__Propionibacteriaceae; g__Propionibacterium; s__Propionibacterium_avidum	0.98699	0.990549	0.0353804	0.0496984	0	0	3.27027e-05	0	0	0	0	0	0	0
k__Bacteria; p__Actinobacteria; c__Actinobacteria; o__Actinomycetales; f__Propionibacteriaceae; g__Propionibacterium; s__Propionibacterium_freudenreichii	0.947362	0.990549	0.0392919	0.0496984	0	0	0.000225676	0	0	0	0	0	0	0
k__Bacteria; p__Actinobacteria; c__Actinobacteria; o__Bifidobacteriales; f__Bifidobacteriaceae; g__Bifidobacterium; s__Bifidobacterium_animalis	0.321744	0.811205	0.0215831	0.0496984	0	0.0594739	0.000112703	0	0	0	0	0	0	0
k__Bacteria; p__Actinobacteria; c__Actinobacteria; o__Bifidobacteriales; f__Bifidobacteriaceae; g__Bifidobacterium; s__Bifidobacterium_minimum	NA	NA	0.0338729	0.0496984	0	0	0	0	0	0	0	0	0	0
k__Bacteria; p__Actinobacteria; c__Actinobacteria; o__Bifidobacteriales; f__Bifidobacteriaceae; g__Scardovia; s__Scardovia_inopinata	0.547232	0.869794	0.0526166	0.0579978	0	0	0.00152432	0.00624	0	0	0	0	0	0
k__Bacteria; p__Actinobacteria; c__Actinobacteria; o__Coriobacteriales; f__Coriobacteriaceae; g__Atopobium; s__Atopobium_minutum	0.986202	0.990549	0.0354496	0.0496984	0	0	0.015413	0	0	0	0	0	0	0
k__Bacteria; p__Actinobacteria; c__Actinobacteria; o__Coriobacteriales; f__Coriobacteriaceae; g__Collinsella; s__Collinsella_stercoris	NA	NA	0.0338729	0.0496984	0	0	0	0	0	0	0	0	0	0
k__Bacteria; p__Bacteroidetes; c__Bacteroidetes_noname; o__Bacteroidetes_noname; f__Bacteroidetes_noname; g__Bacteroidetes_noname; s__Bacteroidetes_bacterium_oral_taxon_272	NA	NA	0.0338729	0.0496984	0	0	0	0	0	0	0	0	0	0
k__Bacteria; p__Bacteroidetes; c__Bacteroidetes_noname; o__Bacteroidetes_noname; f__Bacteroidetes_noname; g__Bacteroidetes_noname; s__Bacteroidetes_oral_taxon_274	NA	NA	0.0338729	0.0496984	0	0	0	0	0	0	0	0	0	0
k__Bacteria; p__Bacteroidetes; c__Bacteroidia; o__Bacteroidales; f__Bacteroidaceae; g__Bacteroides; s__Bacteroides_gallinarum	0.983833	0.990549	0.0365191	0.0496984	0	0.00905024	0	0	0	0	0	0	0	0
k__Bacteria; p__Bacteroidetes; c__Bacteroidia; o__Bacteroidales; f__Bacteroidaceae; g__Bacteroides; s__Bacteroides_sp_2_1_22	0.985046	0.990549	0.0347204	0.0496984	0	0.0406693	0	0	0	0	0	0	0	0
k__Bacteria; p__Bacteroidetes; c__Bacteroidia; o__Bacteroidales; f__Porphyromonadaceae; g__Porphyromonas; s__Porphyromonas_endodontalis	0.521698	0.849477	0.0365672	0.0496984	0	0	0	0.0059925	0	0	0	0	0	0
k__Bacteria; p__Bacteroidetes; c__Bacteroidia; o__Bacteroidales; f__Porphyromonadaceae; g__Porphyromonas; s__Porphyromonas_gingivalis	NA	NA	0.0338729	0.0496984	0	0	0	0	0	0	0	0	0	0
k__Bacteria; p__Bacteroidetes; c__Bacteroidia; o__Bacteroidales; f__Prevotellaceae; g__Alloprevotella; s__Alloprevotella_unclassified	NA	NA	0.0338729	0.0496984	0	0	0	0	0	0	0	0	0	0
k__Bacteria; p__Bacteroidetes; c__Bacteroidia; o__Bacteroidales; f__Prevotellaceae; g__Prevotella; s__Prevotella_histicola	0.986107	0.990549	0.0354711	0.0496984	0	0	0.000146486	0	0	0	0	0	0	0
k__Bacteria; p__Bacteroidetes; c__Bacteroidia; o__Bacteroidales; f__Prevotellaceae; g__Prevotella; s__Prevotella_melaninogenica	0.986221	0.990549	0.0354406	0.0496984	0	0	0.000217027	0	0	0	0	0	0	0
k__Bacteria; p__Bacteroidetes; c__Bacteroidia; o__Bacteroidales; f__Prevotellaceae; g__Prevotella; s__Prevotella_oris	NA	NA	0.0338729	0.0496984	0	0	0	0	0	0	0	0	0	0
k__Bacteria; p__Bacteroidetes; c__Bacteroidia; o__Bacteroidales; f__Prevotellaceae; g__Prevotella; s__Prevotella_oulorum	NA	NA	0.0338729	0.0496984	0	0	0	0	0	0	0	0	0	0
k__Bacteria; p__Firmicutes; c__Bacilli; o__Bacillales; f__Staphylococcaceae; g__Staphylococcus; s__Staphylococcus_aureus	0.364032	0.811205	0.0371662	0.0496984	0	0.0497473	0.00159622	0.0005625	0	0	0	0	0	0
k__Bacteria; p__Firmicutes; c__Bacilli; o__Bacillales; f__Staphylococcaceae; g__Staphylococcus; s__Staphylococcus_carnosus	NA	NA	0.0338729	0.0496984	0	0	0	0	0	0	0	0	0	0
k__Bacteria; p__Firmicutes; c__Bacilli; o__Bacillales; f__Staphylococcaceae; g__Staphylococcus; s__Staphylococcus_epidermidis	0.5129	0.849477	0.0481741	0.0545898	0	0.00148585	0.188563	0.12453	0	0	0	0	0.081045	0
k__Bacteria; p__Firmicutes; c__Bacilli; o__Bacillales; f__Staphylococcaceae; g__Staphylococcus; s__Staphylococcus_haemolyticus	0.58067	0.87565	0.0472806	0.0543391	0	0	0.000677838	0	0	0	0	0	0	0
k__Bacteria; p__Firmicutes; c__Bacilli; o__Bacillales; f__Staphylococcaceae; g__Staphylococcus; s__Staphylococcus_pasteuri	0.399479	0.818925	0.0313224	0.0496984	0	0	0.00243459	0	0	0	0	0	0	0
k__Bacteria; p__Firmicutes; c__Bacilli; o__Bacillales; f__Staphylococcaceae; g__Staphylococcus; s__Staphylococcus_simiae	NA	NA	0.0338729	0.0496984	0	0	0	0	0	0	0	0	0	0
k__Bacteria; p__Firmicutes; c__Bacilli; o__Lactobacillales; f__Aerococcaceae; g__Facklamia; s__Facklamia_hominis	NA	NA	0.0338729	0.0496984	0	0	0	0	0	0	0	0	0	0
k__Bacteria; p__Firmicutes; c__Bacilli; o__Lactobacillales; f__Enterococcaceae; g__Enterococcus; s__Enterococcus_cecorum	0.522781	0.849477	0.0365333	0.0496984	0	0	0	0.0023325	0	0	0	0	0	0
k__Bacteria; p__Firmicutes; c__Bacilli; o__Lactobacillales; f__Enterococcaceae; g__Enterococcus; s__Enterococcus_durans	NA	NA	0.0338729	0.0496984	0	0	0	0	0	0	0	0	0	0
k__Bacteria; p__Firmicutes; c__Bacilli; o__Lactobacillales; f__Enterococcaceae; g__Enterococcus; s__Enterococcus_raffinosus	0.0744153	0.438353	0.0399924	0.0496984	0	0.00292805	0	0	1.26363	0	0	0	0	0
k__Bacteria; p__Firmicutes; c__Bacilli; o__Lactobacillales; f__Lactobacillaceae; g__Lactobacillus; s__Lactobacillus_coryniformis	0.522903	0.849477	0.0365336	0.0496984	0	0	0	0.0370875	0	0	0	0	0	0
k__Bacteria; p__Firmicutes; c__Bacilli; o__Lactobacillales; f__Lactobacillaceae; g__Lactobacillus; s__Lactobacillus_delbrueckii	0.947208	0.990549	0.0392953	0.0496984	0	0	0.00144162	0	0	0	0	0	0	0
k__Bacteria; p__Firmicutes; c__Bacilli; o__Lactobacillales; f__Lactobacillaceae; g__Lactobacillus; s__Lactobacillus_helveticus	NA	NA	0.0338729	0.0496984	0	0	0	0	0	0	0	0	0	0
k__Bacteria; p__Firmicutes; c__Bacilli; o__Lactobacillales; f__Lactobacillaceae; g__Lactobacillus; s__Lactobacillus_iners	NA	NA	0.0338729	0.0496984	0	0	0	0	0	0	0	0	0	0
k__Bacteria; p__Firmicutes; c__Bacilli; o__Lactobacillales; f__Lactobacillaceae; g__Lactobacillus; s__Lactobacillus_pentosus	NA	NA	0.0338729	0.0496984	0	0	0	0	0	0	0	0	0	0
k__Bacteria; p__Firmicutes; c__Bacilli; o__Lactobacillales; f__Lactobacillaceae; g__Lactobacillus; s__Lactobacillus_reuteri	NA	NA	0.0338729	0.0496984	0	0	0	0	0	0	0	0	0	0
k__Bacteria; p__Firmicutes; c__Bacilli; o__Lactobacillales; f__Lactobacillaceae; g__Lactobacillus; s__Lactobacillus_ruminis	0.957977	0.990549	0.0358999	0.0496984	0	0	0.000185946	0	0	0	0	0	0	0
k__Bacteria; p__Firmicutes; c__Bacilli; o__Lactobacillales; f__Lactobacillaceae; g__Lactobacillus; s__Lactobacillus_vaginalis	0.549101	0.869794	0.0348366	0.0496984	0	0.000713902	0.0331603	0	0.00587667	0	0	0	0	0
k__Bacteria; p__Firmicutes; c__Bacilli; o__Lactobacillales; f__Lactobacillaceae; g__Pediococcus; s__Pediococcus_pentosaceus	NA	NA	0.0338729	0.0496984	0	0	0	0	0	0	0	0	0	0
k__Bacteria; p__Firmicutes; c__Bacilli; o__Lactobacillales; f__Leuconostocaceae; g__Leuconostoc; s__Leuconostoc_fallax	NA	NA	0.0338729	0.0496984	0	0	0	0	0	0	0	0	0	0
k__Bacteria; p__Firmicutes; c__Bacilli; o__Lactobacillales; f__Leuconostocaceae; g__Leuconostoc; s__Leuconostoc_inhae	NA	NA	0.0338729	0.0496984	0	0	0	0	0	0	0	0	0	0
k__Bacteria; p__Firmicutes; c__Bacilli; o__Lactobacillales; f__Leuconostocaceae; g__Leuconostoc; s__Leuconostoc_kimchii	NA	NA	0.0338729	0.0496984	0	0	0	0	0	0	0	0	0	0
k__Bacteria; p__Firmicutes; c__Bacilli; o__Lactobacillales; f__Leuconostocaceae; g__Leuconostoc; s__Leuconostoc_pseudomesenteroides	0.664449	0.941164	0.0312762	0.0496984	0	0	0.00013973	0.00093	0	0	0	0	0	0
k__Bacteria; p__Firmicutes; c__Bacilli; o__Lactobacillales; f__Streptococcaceae; g__Lactococcus; s__Lactococcus_raffinolactis	NA	NA	0.0338729	0.0496984	0	0	0	0	0	0	0	0	0	0
k__Bacteria; p__Firmicutes; c__Bacilli; o__Lactobacillales; f__Streptococcaceae; g__Streptococcus; s__Streptococcus_ferus	NA	NA	0.0338729	0.0496984	0	0	0	0	0	0	0	0	0	0
k__Bacteria; p__Firmicutes; c__Bacilli; o__Lactobacillales; f__Streptococcaceae; g__Streptococcus; s__Streptococcus_gallolyticus	NA	NA	0.0338729	0.0496984	0	0	0	0	0	0	0	0	0	0
k__Bacteria; p__Firmicutes; c__Bacilli; o__Lactobacillales; f__Streptococcaceae; g__Streptococcus; s__Streptococcus_urinalis	0.510995	0.849477	0.0378402	0.0496984	0	0	0	0.00281	0	0	0	0	0	0
k__Bacteria; p__Firmicutes; c__Clostridia; o__Clostridiales; f__Clostridiaceae; g__Clostridium; s__Clostridium_sp_7_2_43FAA	NA	NA	0.0338729	0.0496984	0	0	0	0	0	0	0	0	0	0
k__Bacteria; p__Firmicutes; c__Clostridia; o__Clostridiales; f__Clostridiales_Family_XI_Incertae_Sedis; g__Anaerococcus; s__Anaerococcus_prevotii	NA	NA	0.0338729	0.0496984	0	0	0	0	0	0	0	0	0	0
k__Bacteria; p__Firmicutes; c__Clostridia; o__Clostridiales; f__Eubacteriaceae; g__Pseudoramibacter; s__Pseudoramibacter_alactolyticus	0.562252	0.872651	0.0321565	0.0496984	0	9.87805e-05	0	0	0.00204	0	0	0	0	0
k__Bacteria; p__Firmicutes; c__Clostridia; o__Clostridiales; f__Lachnospiraceae; g__Anaerostipes; s__Anaerostipes_sp_3_2_56FAA	NA	NA	0.0338729	0.0496984	0	0	0	0	0	0	0	0	0	0
k__Bacteria; p__Firmicutes; c__Clostridia; o__Clostridiales; f__Lachnospiraceae; g__Johnsonella; s__Johnsonella_ignava	NA	NA	0.0338729	0.0496984	0	0	0	0	0	0	0	0	0	0
k__Bacteria; p__Firmicutes; c__Clostridia; o__Clostridiales; f__Lachnospiraceae; g__Lachnoanaerobaculum; s__Lachnoanaerobaculum_saburreum	0.986364	0.990549	0.0355451	0.0496984	0	0	0.00207486	0	0	0	0	0	0	0
k__Bacteria; p__Firmicutes; c__Clostridia; o__Clostridiales; f__Lachnospiraceae; g__Lachnospiraceae_noname; s__Lachnospiraceae_bacterium_ICM7	0.601812	0.89324	0.040184	0.0496984	0	0	0.00294189	0.0383075	0	0	0	0	0	0
k__Bacteria; p__Firmicutes; c__Clostridia; o__Clostridiales; f__Lachnospiraceae; g__Lachnospiraceae_noname; s__Lachnospiraceae_bacterium_oral_taxon_082	0.986301	0.990549	0.0354202	0.0496984	0	0	0.00384027	0	0	0	0	0	0	0
k__Bacteria; p__Firmicutes; c__Clostridia; o__Clostridiales; f__Lachnospiraceae; g__Lachnospiraceae_noname; s__Lachnospiraceae_oral_taxon_107	0.986009	0.990549	0.0355042	0.0496984	0	0	0.000297838	0	0	0	0	0	0	0
k__Bacteria; p__Firmicutes; c__Clostridia; o__Clostridiales; f__Lachnospiraceae; g__Oribacterium; s__Oribacterium_sp_ACB8	0.986195	0.990549	0.0354478	0.0496984	0	0	0.0193708	0	0	0	0	0	0	0
k__Bacteria; p__Firmicutes; c__Clostridia; o__Clostridiales; f__Lachnospiraceae; g__Oribacterium; s__Oribacterium_sp_oral_taxon_078	0.591412	0.881274	0.0401381	0.0496984	0	0	0.00261	0.059975	0	0	0	0	0	0
k__Bacteria; p__Firmicutes; c__Clostridia; o__Clostridiales; f__Lachnospiraceae; g__Stomatobaculum; s__Stomatobaculum_longum	0.367638	0.811205	0.0480837	0.0545898	0	0	0.0325819	1.46598	0	0	0	0	0	0
k__Bacteria; p__Firmicutes; c__Clostridia; o__Clostridiales; f__Peptostreptococcaceae; g__Peptostreptococcaceae_noname; s__Clostridium_glycolicum	NA	NA	0.0338729	0.0496984	0	0	0	0	0	0	0	0	0	0
k__Bacteria; p__Firmicutes; c__Clostridia; o__Clostridiales; f__Peptostreptococcaceae; g__Peptostreptococcaceae_noname; s__Clostridium_sordellii	NA	NA	0.0338729	0.0496984	0	0	0	0	0	0	0	0	0	0
k__Bacteria; p__Firmicutes; c__Erysipelotrichia; o__Erysipelotrichales; f__Erysipelotrichaceae; g__Eggerthia; s__Eggerthia_catenaformis	NA	NA	0.0338729	0.0496984	0	0	0	0	0	0	0	0	0	0
k__Bacteria; p__Firmicutes; c__Erysipelotrichia; o__Erysipelotrichales; f__Erysipelotrichaceae; g__Erysipelotrichaceae_noname; s__Clostridium_spiroforme	NA	NA	0.0338729	0.0496984	0	0	0	0	0	0	0	0	0	0
k__Bacteria; p__Firmicutes; c__Negativicutes; o__Selenomonadales; f__Veillonellaceae; g__Anaeroglobus; s__Anaeroglobus_geminatus	NA	NA	0.0338729	0.0496984	0	0	0	0	0	0	0	0	0	0
k__Bacteria; p__Firmicutes; c__Negativicutes; o__Selenomonadales; f__Veillonellaceae; g__Selenomonas; s__Selenomonas_noxia	0.986229	0.990549	0.0354635	0.0496984	0	0	0.00231487	0	0	0	0	0	0	0
k__Bacteria; p__Proteobacteria; c__Alphaproteobacteria; o__Sphingomonadales; f__Sphingomonadaceae; g__Sphingomonas; s__Sphingomonas_echinoides	NA	NA	0.0338729	0.0496984	0	0	0	0	0	0	0	0	0	0
k__Bacteria; p__Proteobacteria; c__Betaproteobacteria; o__Burkholderiales; f__Alcaligenaceae; g__Pusillimonas; s__Pusillimonas_unclassified	NA	NA	0.0338729	0.0496984	0	0	0	0	0	0	0	0	0	0
k__Bacteria; p__Proteobacteria; c__Betaproteobacteria; o__Burkholderiales; f__Burkholderiaceae; g__Lautropia; s__Lautropia_mirabilis	0.696512	0.961473	0.0469559	0.0542037	0	0	0.00738757	0	0	0	0	0	0	0
k__Bacteria; p__Proteobacteria; c__Betaproteobacteria; o__Burkholderiales; f__Burkholderiaceae; g__Ralstonia; s__Ralstonia_pickettii	0.522834	0.849477	0.036535	0.0496984	0	0	0	0.0005725	0	0	0	0	0	0
k__Bacteria; p__Proteobacteria; c__Betaproteobacteria; o__Burkholderiales; f__Burkholderiaceae; g__Ralstonia; s__Ralstonia_unclassified	0.986012	0.990549	0.0354956	0.0496984	0	0	0.000183243	0	0	0	0	0	0	0
k__Bacteria; p__Proteobacteria; c__Betaproteobacteria; o__Burkholderiales; f__Comamonadaceae; g__Comamonas; s__Comamonas_unclassified	NA	NA	0.0338729	0.0496984	0	0	0	0	0	0	0	0	0	0
k__Bacteria; p__Proteobacteria; c__Betaproteobacteria; o__Neisseriales; f__Neisseriaceae; g__Eikenella; s__Eikenella_corrodens	0.986194	0.990549	0.035438	0.0496984	0	0	0.000169189	0	0	0	0	0	0	0
k__Bacteria; p__Proteobacteria; c__Betaproteobacteria; o__Neisseriales; f__Neisseriaceae; g__Neisseria; s__Neisseria_elongata	NA	NA	0.0338729	0.0496984	0	0	0	0	0	0	0	0	0	0
k__Bacteria; p__Proteobacteria; c__Betaproteobacteria; o__Neisseriales; f__Neisseriaceae; g__Neisseria; s__Neisseria_flavescens	0.98623	0.990549	0.0354276	0.0496984	0	0	0.00498784	0	0	0	0	0	0	0
k__Bacteria; p__Proteobacteria; c__Betaproteobacteria; o__Neisseriales; f__Neisseriaceae; g__Neisseria; s__Neisseria_meningitidis	0.986136	0.990549	0.0354515	0.0496984	0	0	2.10811e-05	0	0	0	0	0	0	0
k__Bacteria; p__Proteobacteria; c__Betaproteobacteria; o__Neisseriales; f__Neisseriaceae; g__Neisseria; s__Neisseria_sicca	0.985967	0.990549	0.0354887	0.0496984	0	0	0.000389189	0	0	0	0	0	0	0
k__Bacteria; p__Proteobacteria; c__Betaproteobacteria; o__Neisseriales; f__Neisseriaceae; g__Neisseria; s__Neisseria_subflava	0.986365	0.990549	0.0354726	0.0496984	0	0	8.10811e-05	0	0	0	0	0	0	0
k__Bacteria; p__Proteobacteria; c__Betaproteobacteria; o__Neisseriales; f__Neisseriaceae; g__Neisseria; s__Neisseria_unclassified	0.986062	0.990549	0.0354384	0.0496984	0	0	0.00421568	0	0	0	0	0	0	0
k__Bacteria; p__Proteobacteria; c__Epsilonproteobacteria; o__Campylobacterales; f__Campylobacteraceae; g__Campylobacter; s__Campylobacter_concisus	NA	NA	0.0338729	0.0496984	0	0	0	0	0	0	0	0	0	0
k__Bacteria; p__Proteobacteria; c__Epsilonproteobacteria; o__Campylobacterales; f__Campylobacteraceae; g__Campylobacter; s__Campylobacter_gracilis	NA	NA	0.0338729	0.0496984	0	0	0	0	0	0	0	0	0	0
k__Bacteria; p__Proteobacteria; c__Epsilonproteobacteria; o__Campylobacterales; f__Campylobacteraceae; g__Campylobacter; s__Campylobacter_ureolyticus	0.420586	0.836884	0.0312143	0.0496984	0	0	0.000107297	0	0	0	0	0	0	0
k__Bacteria; p__Proteobacteria; c__Gammaproteobacteria; o__Enterobacteriales; f__Enterobacteriaceae; g__Escherichia; s__Escherichia_hermannii	0.398686	0.818925	0.0313645	0.0496984	0	0	3.05405e-05	0	0	0	0	0	0	0
k__Bacteria; p__Proteobacteria; c__Gammaproteobacteria; o__Enterobacteriales; f__Enterobacteriaceae; g__Pantoea; s__Pantoea_agglomerans	NA	NA	0.0338729	0.0496984	0	0	0	0	0	0	0	0	0	0
k__Bacteria; p__Proteobacteria; c__Gammaproteobacteria; o__Enterobacteriales; f__Enterobacteriaceae; g__Pantoea; s__Pantoea_unclassified	NA	NA	0.0338729	0.0496984	0	0	0	0	0	0	0	0	0	0
k__Bacteria; p__Proteobacteria; c__Gammaproteobacteria; o__Enterobacteriales; f__Enterobacteriaceae; g__Rahnella; s__Rahnella_aquatilis	NA	NA	0.0338729	0.0496984	0	0	0	0	0	0	0	0	0	0
k__Bacteria; p__Proteobacteria; c__Gammaproteobacteria; o__Enterobacteriales; f__Enterobacteriaceae; g__Rahnella; s__Rahnella_unclassified	0.580257	0.87565	0.0474495	0.0544043	0	0	0.000418378	0	0	0	0	0	0	0
k__Bacteria; p__Proteobacteria; c__Gammaproteobacteria; o__Pasteurellales; f__Pasteurellaceae; g__Aggregatibacter; s__Aggregatibacter_aphrophilus	NA	NA	0.0338729	0.0496984	0	0	0	0	0	0	0	0	0	0
k__Bacteria; p__Proteobacteria; c__Gammaproteobacteria; o__Pasteurellales; f__Pasteurellaceae; g__Aggregatibacter; s__Aggregatibacter_segnis	0.718664	0.964186	0.0323116	0.0496984	0	0.000100244	0.000298649	0	0	0	0	0	0	0
k__Bacteria; p__Proteobacteria; c__Gammaproteobacteria; o__Pasteurellales; f__Pasteurellaceae; g__Aggregatibacter; s__Aggregatibacter_unclassified	NA	NA	0.0338729	0.0496984	0	0	0	0	0	0	0	0	0	0
k__Bacteria; p__Proteobacteria; c__Gammaproteobacteria; o__Pasteurellales; f__Pasteurellaceae; g__Haemophilus; s__Haemophilus_haemolyticus	NA	NA	0.0338729	0.0496984	0	0	0	0	0	0	0	0	0	0
k__Bacteria; p__Proteobacteria; c__Gammaproteobacteria; o__Pseudomonadales; f__Moraxellaceae; g__Acinetobacter; s__Acinetobacter_junii	NA	NA	0.0338729	0.0496984	0	0	0	0	0	0	0	0	0	0
k__Bacteria; p__Proteobacteria; c__Gammaproteobacteria; o__Pseudomonadales; f__Moraxellaceae; g__Acinetobacter; s__Acinetobacter_unclassified	NA	NA	0.0338729	0.0496984	0	0	0	0	0	0	0	0	0	0
k__Bacteria; p__Proteobacteria; c__Gammaproteobacteria; o__Pseudomonadales; f__Pseudomonadaceae; g__Pseudomonas; s__Pseudomonas_aeruginosa	0.223347	0.7234	0.0358193	0.0496984	0	0.000210244	0	0.064405	0.0161667	0	0	0	0	0
k__Bacteria; p__Proteobacteria; c__Gammaproteobacteria; o__Pseudomonadales; f__Pseudomonadaceae; g__Pseudomonas; s__Pseudomonas_unclassified	0.701261	0.961473	0.0356167	0.0496984	0	0	0.000421351	0	0.00104	0	0	0	0	0
k__Bacteria; p__Spirochaetes; c__Spirochaetia; o__Spirochaetales; f__Spirochaetaceae; g__Treponema; s__Treponema_maltophilum	NA	NA	0.0338729	0.0496984	0	0	0	0	0	0	0	0	0	0
k__Bacteria; p__Spirochaetes; c__Spirochaetia; o__Spirochaetales; f__Spirochaetaceae; g__Treponema; s__Treponema_socranskii	NA	NA	0.0338729	0.0496984	0	0	0	0	0	0	0	0	0	0
k__Bacteria; p__Synergistetes; c__Synergistia; o__Synergistales; f__Synergistaceae; g__Fretibacterium; s__Fretibacterium_fastidiosum	NA	NA	0.0338729	0.0496984	0	0	0	0	0	0	0	0	0	0
k__Bacteria; p__Tenericutes; c__Mollicutes; o__Mycoplasmatales; f__Mycoplasmataceae; g__Mycoplasma; s__Mycoplasma_hominis	NA	NA	0.0338729	0.0496984	0	0	0	0	0	0	0	0	0	0
k__Bacteria; p__Tenericutes; c__Mollicutes; o__Mycoplasmatales; f__Mycoplasmataceae; g__Ureaplasma; s__Ureaplasma_unclassified	NA	NA	0.0338729	0.0496984	0	0	0	0	0	0	0	0	0	0
k__Bacteria; p__Tenericutes; c__Mollicutes; o__Mycoplasmatales; f__Mycoplasmataceae; g__Ureaplasma; s__Ureaplasma_urealyticum	NA	NA	0.0338729	0.0496984	0	0	0	0	0	0	0	0	0	0

## Sheet: Table S5
	NT-proBNP			IL10			IL12-p70			IL1b			IL6			CXCL8			CXCL10			CCL2			TNFa
taxonomy	p value	adjusted p value	correlation	p value	adjusted p value	correlation	p value	adjusted p value	correlation	p value	adjusted p value	correlation	p value	adjusted p value	correlation	p value	adjusted p value	correlation	p value	adjusted p value	correlation	p value	adjusted p value	correlation	p value	adjusted p value	correlation
k__Archaea; p__Euryarchaeota; c__Methanobacteria; o__Methanobacteriales; f__Methanobacteriaceae; g__Methanobrevibacter; s__Methanobrevibacter_smithii	0.856222	0.99498	0.0223842	0.383777	0.800263	-0.114478	0.150154	0.776678	-0.188066	0.941238	1	-0.00972077	0.551121	0.968989	0.0784858	0.713703	0.966528	0.0483544	0.429945	0.878347	-0.103804	0.690259	0.95424	0.0525159	0.00953647	0.354013	-0.332082
k__Archaea; p__Euryarchaeota; c__Methanobacteria; o__Methanobacteriales; f__Methanobacteriaceae; g__Methanobrevibacter; s__Methanobrevibacter_unclassified	0.34992	0.871498	-0.115111	0.530634	0.860412	0.0825485	0.245384	0.776678	0.152293	0.782864	0.997978	0.0363308	0.394117	0.968989	-0.112025	0.239	0.844179	-0.154347	0.947514	0.997838	0.00868087	0.599572	0.95424	0.0691527	0.804732	0.943894	-0.0325941
k__Archaea; p__Euryarchaeota; c__Methanobacteria; o__Methanobacteriales; f__Methanobacteriaceae; g__Methanosphaera; s__Methanosphaera_stadtmanae	0.0801687	0.770971	-0.213687	0.819032	0.981764	0.0301646	0.825377	0.959167	0.0290897	0.537522	0.991132	0.0811742	0.794055	0.968989	0.0344152	0.793634	0.969451	0.0344871	0.844216	0.971246	-0.0259093	0.880971	0.975097	-0.0197446	0.0817381	0.676872	-0.226556
k__Bacteria; p__Actinobacteria; c__Actinobacteria; o__Actinomycetales; f__Actinomycetaceae; g__Actinobaculum; s__Actinobaculum_schaalii	0.860026	0.99498	-0.0217859	0.141541	0.570844	-0.192054	0.358786	0.776678	-0.120576	0.346178	0.991132	-0.12375	0.157592	0.968989	-0.184757	0.345032	0.844179	-0.124042	0.239735	0.799044	-0.154109	0.977261	0.98866	-0.00375875	0.206591	0.771591	-0.165406
k__Bacteria; p__Actinobacteria; c__Actinobacteria; o__Actinomycetales; f__Actinomycetaceae; g__Actinobaculum; s__Actinobaculum_sp_oral_taxon_183	0.826195	0.9943	0.0271265	NA	NA	NA	NA	NA	NA	NA	NA	NA	NA	NA	NA	NA	NA	NA	NA	NA	NA	NA	NA	NA	NA	NA	NA
k__Bacteria; p__Actinobacteria; c__Actinobacteria; o__Actinomycetales; f__Actinomycetaceae; g__Actinomyces; s__Actinomyces_cardiffensis	0.282637	0.835256	-0.13217	0.248375	0.709211	0.151344	0.365428	0.776678	0.11893	0.20609	0.991132	0.165586	0.194507	0.968989	0.169842	0.107209	0.79889	0.210053	0.900728	0.986119	0.0164491	0.531828	0.929231	-0.0823096	0.557791	0.815576	-0.0771789
k__Bacteria; p__Actinobacteria; c__Actinobacteria; o__Actinomycetales; f__Actinomycetaceae; g__Actinomyces; s__Actinomyces_georgiae	0.76047	0.9943	0.0376552	0.551052	0.871707	-0.0784995	0.188921	0.776678	-0.171959	0.947794	1	-0.00863455	0.313673	0.968989	-0.132283	0.116934	0.79889	-0.204555	0.995676	0.997838	0.000714738	0.580808	0.940187	0.0727246	0.587302	0.83127	-0.0714828
k__Bacteria; p__Actinobacteria; c__Actinobacteria; o__Actinomycetales; f__Actinomycetaceae; g__Actinomyces; s__Actinomyces_graevenitzii	0.848674	0.99498	0.0235729	0.735815	0.95557	-0.0444722	0.462463	0.875133	-0.0966731	0.475642	0.991132	-0.0938613	0.890625	0.968989	-0.0181328	0.695083	0.966487	-0.0516555	0.843855	0.971246	0.02597	0.528089	0.929231	-0.0830584	0.0733234	0.676872	-0.232901
k__Bacteria; p__Actinobacteria; c__Actinobacteria; o__Actinomycetales; f__Actinomycetaceae; g__Actinomyces; s__Actinomyces_johnsonii	0.637682	0.9943	-0.0581397	0.718204	0.948132	0.047561	0.624633	0.922758	0.0644579	0.292666	0.991132	0.138103	0.0848757	0.968989	0.224322	0.446926	0.929067	0.100044	0.937419	0.994314	-0.0103537	0.542896	0.929231	0.080108	0.382602	0.774195	0.114759
k__Bacteria; p__Actinobacteria; c__Actinobacteria; o__Actinomycetales; f__Actinomycetaceae; g__Actinomyces; s__Actinomyces_massiliensis	0.702203	0.9943	0.0472161	0.0813904	0.570844	-0.226807	0.233868	0.776678	-0.156026	0.184527	0.991132	-0.173656	0.303404	0.968989	0.135096	0.442158	0.929067	0.101092	0.0122997	0.282123	-0.32133	0.0379729	0.754064	-0.268606	0.00525889	0.354013	-0.355891
k__Bacteria; p__Actinobacteria; c__Actinobacteria; o__Actinomycetales; f__Actinomycetaceae; g__Actinomyces; s__Actinomyces_naeslundii	0.961113	0.99498	-0.00602427	0.758632	0.95557	0.0405052	0.802642	0.959167	0.0329501	0.424676	0.991132	0.104988	0.518886	0.968989	0.0849129	0.977293	0.996228	-0.00375343	0.128413	0.703398	-0.198498	0.0313584	0.754064	-0.278226	0.170135	0.771591	-0.179428
k__Bacteria; p__Actinobacteria; c__Actinobacteria; o__Actinomycetales; f__Actinomycetaceae; g__Actinomyces; s__Actinomyces_neuii	NA	NA	NA	NA	NA	NA	NA	NA	NA	NA	NA	NA	NA	NA	NA	NA	NA	NA	NA	NA	NA	NA	NA	NA	NA	NA	NA
k__Bacteria; p__Actinobacteria; c__Actinobacteria; o__Actinomycetales; f__Actinomycetaceae; g__Actinomyces; s__Actinomyces_odontolyticus	0.340416	0.85943	-0.117386	0.0236115	0.565436	-0.291946	0.975274	0.988416	-0.00408725	0.109631	0.991132	-0.208649	0.149123	0.968989	-0.188535	0.0809845	0.79889	-0.227102	0.463718	0.90305	-0.0964034	0.163696	0.883476	-0.182127	0.017835	0.436364	-0.304931
k__Bacteria; p__Actinobacteria; c__Actinobacteria; o__Actinomycetales; f__Actinomycetaceae; g__Actinomyces; s__Actinomyces_oris	0.737627	0.9943	-0.041374	0.395399	0.810678	-0.111724	0.86521	0.959167	-0.0223822	0.832867	0.997978	-0.0278233	0.17861	0.968989	0.175988	0.337122	0.844179	0.126075	0.354751	0.83996	-0.121584	0.269654	0.914483	-0.144801	0.308633	0.774195	-0.133656
k__Bacteria; p__Actinobacteria; c__Actinobacteria; o__Actinomycetales; f__Actinomycetaceae; g__Actinomyces; s__Actinomyces_sp_HPA0247	0.162804	0.770971	0.171175	0.0995692	0.570844	0.214649	0.358786	0.776678	-0.120576	0.485359	0.991132	0.0918148	0.287727	0.968989	0.139511	0.886661	0.969451	-0.0187943	0.100217	0.684132	0.214249	0.113007	0.754064	0.206731	0.142248	0.756594	0.19172
k__Bacteria; p__Actinobacteria; c__Actinobacteria; o__Actinomycetales; f__Actinomycetaceae; g__Actinomyces; s__Actinomyces_sp_ICM39	0.528254	0.9943	0.0778069	0.141541	0.570844	-0.192054	0.358786	0.776678	-0.120576	0.585352	0.991132	0.0718551	0.931642	0.983395	-0.0113117	0.75377	0.969451	-0.0413474	0.263714	0.799044	0.146591	0.142299	0.815995	0.191696	0.819567	0.943894	-0.0300738
k__Bacteria; p__Actinobacteria; c__Actinobacteria; o__Actinomycetales; f__Actinomycetaceae; g__Actinomyces; s__Actinomyces_sp_ICM47	0.826195	0.9943	0.0271265	NA	NA	NA	NA	NA	NA	NA	NA	NA	NA	NA	NA	NA	NA	NA	NA	NA	NA	NA	NA	NA	NA	NA	NA
k__Bacteria; p__Actinobacteria; c__Actinobacteria; o__Actinomycetales; f__Actinomycetaceae; g__Actinomyces; s__Actinomyces_sp_oral_taxon_180	NA	NA	NA	NA	NA	NA	NA	NA	NA	NA	NA	NA	NA	NA	NA	NA	NA	NA	NA	NA	NA	NA	NA	NA	NA	NA	NA
k__Bacteria; p__Actinobacteria; c__Actinobacteria; o__Actinomycetales; f__Actinomycetaceae; g__Actinomyces; s__Actinomyces_sp_oral_taxon_448	NA	NA	NA	NA	NA	NA	NA	NA	NA	NA	NA	NA	NA	NA	NA	NA	NA	NA	NA	NA	NA	NA	NA	NA	NA	NA	NA
k__Bacteria; p__Actinobacteria; c__Actinobacteria; o__Actinomycetales; f__Actinomycetaceae; g__Actinomyces; s__Actinomyces_sp_oral_taxon_848	NA	NA	NA	NA	NA	NA	NA	NA	NA	NA	NA	NA	NA	NA	NA	NA	NA	NA	NA	NA	NA	NA	NA	NA	NA	NA	NA
k__Bacteria; p__Actinobacteria; c__Actinobacteria; o__Actinomycetales; f__Actinomycetaceae; g__Actinomyces; s__Actinomyces_sp_ph3	0.178875	0.770971	-0.164951	NA	NA	NA	NA	NA	NA	NA	NA	NA	NA	NA	NA	NA	NA	NA	NA	NA	NA	NA	NA	NA	NA	NA	NA
k__Bacteria; p__Actinobacteria; c__Actinobacteria; o__Actinomycetales; f__Actinomycetaceae; g__Actinomyces; s__Actinomyces_timonensis	0.603845	0.9943	0.0640461	0.37817	0.800263	0.115825	0.740478	0.959167	0.0436584	0.676213	0.997978	0.0550334	0.081599	0.968989	0.226656	0.139773	0.79889	0.192895	0.305381	0.799044	0.134549	0.379436	0.928354	0.11552	0.501078	0.787803	0.0885493
k__Bacteria; p__Actinobacteria; c__Actinobacteria; o__Actinomycetales; f__Actinomycetaceae; g__Actinomyces; s__Actinomyces_turicensis	0.0163662	0.770971	0.290206	0.43298	0.820193	-0.103126	0.0811851	0.776678	-0.226956	0.912072	1	-0.0145615	0.677231	0.968989	0.0548504	0.643252	0.966487	0.0610211	0.140197	0.729199	-0.192693	0.989537	0.992241	0.00172929	0.0648026	0.676872	-0.239949
k__Bacteria; p__Actinobacteria; c__Actinobacteria; o__Actinomycetales; f__Actinomycetaceae; g__Actinomyces; s__Actinomyces_viscosus	0.465355	0.959794	-0.0900215	0.367748	0.798602	-0.11836	0.98161	0.988416	0.00303974	0.999615	1	-6.35608e-05	0.655211	0.968989	0.058835	0.94446	0.987158	-0.00918689	0.309348	0.799044	-0.133461	0.171745	0.889487	-0.178765	0.0723842	0.676872	-0.233645
k__Bacteria; p__Actinobacteria; c__Actinobacteria; o__Actinomycetales; f__Actinomycetaceae; g__Mobiluncus; s__Mobiluncus_curtisii	NA	NA	NA	NA	NA	NA	NA	NA	NA	NA	NA	NA	NA	NA	NA	NA	NA	NA	NA	NA	NA	NA	NA	NA	NA	NA	NA
k__Bacteria; p__Actinobacteria; c__Actinobacteria; o__Actinomycetales; f__Actinomycetaceae; g__Mobiluncus; s__Mobiluncus_unclassified	0.855921	0.99498	-0.0224316	0.141541	0.570844	0.192054	0.358786	0.776678	-0.120576	0.448048	0.991132	0.0997987	0.547586	0.968989	0.0791817	0.345032	0.844179	0.124042	0.668738	0.940332	0.0563813	0.345046	0.914483	0.124039	0.359913	0.774195	0.120295
k__Bacteria; p__Actinobacteria; c__Actinobacteria; o__Actinomycetales; f__Actinomycetaceae; g__Varibaculum; s__Varibaculum_cambriense	0.104495	0.770971	0.198587	0.823812	0.981764	-0.0293546	0.462958	0.875133	-0.0965665	0.578039	0.991132	0.0732563	0.78048	0.968989	0.0367399	0.778524	0.969451	0.0370757	0.28022	0.799044	-0.141681	0.422668	0.929231	0.105441	0.486971	0.787803	-0.0914773
k__Bacteria; p__Actinobacteria; c__Actinobacteria; o__Actinomycetales; f__Actinomycetales_noname; g__Tropheryma; s__Tropheryma_whipplei	NA	NA	NA	NA	NA	NA	NA	NA	NA	NA	NA	NA	NA	NA	NA	NA	NA	NA	NA	NA	NA	NA	NA	NA	NA	NA	NA
k__Bacteria; p__Actinobacteria; c__Actinobacteria; o__Actinomycetales; f__Corynebacteriaceae; g__Corynebacterium; s__Corynebacterium_accolens	0.826195	0.9943	0.0271265	NA	NA	NA	NA	NA	NA	NA	NA	NA	NA	NA	NA	NA	NA	NA	NA	NA	NA	NA	NA	NA	NA	NA	NA
k__Bacteria; p__Actinobacteria; c__Actinobacteria; o__Actinomycetales; f__Corynebacteriaceae; g__Corynebacterium; s__Corynebacterium_amycolatum	0.979904	0.99498	-0.00311227	NA	NA	NA	NA	NA	NA	NA	NA	NA	NA	NA	NA	NA	NA	NA	NA	NA	NA	NA	NA	NA	NA	NA	NA
k__Bacteria; p__Actinobacteria; c__Actinobacteria; o__Actinomycetales; f__Corynebacteriaceae; g__Corynebacterium; s__Corynebacterium_durum	0.0935828	0.770971	-0.204976	0.949321	0.988368	0.00838161	0.605359	0.918045	-0.0680612	0.575302	0.991132	-0.0737826	0.329547	0.968989	-0.12805	0.0746001	0.79889	-0.231903	0.614275	0.940332	-0.0663882	0.193216	0.914483	-0.170327	0.0468094	0.676872	-0.25772
k__Bacteria; p__Actinobacteria; c__Actinobacteria; o__Actinomycetales; f__Corynebacteriaceae; g__Corynebacterium; s__Corynebacterium_glucuronolyticum	NA	NA	NA	NA	NA	NA	NA	NA	NA	NA	NA	NA	NA	NA	NA	NA	NA	NA	NA	NA	NA	NA	NA	NA	NA	NA	NA
k__Bacteria; p__Actinobacteria; c__Actinobacteria; o__Actinomycetales; f__Corynebacteriaceae; g__Corynebacterium; s__Corynebacterium_jeikeium	NA	NA	NA	NA	NA	NA	NA	NA	NA	NA	NA	NA	NA	NA	NA	NA	NA	NA	NA	NA	NA	NA	NA	NA	NA	NA	NA
k__Bacteria; p__Actinobacteria; c__Actinobacteria; o__Actinomycetales; f__Corynebacteriaceae; g__Corynebacterium; s__Corynebacterium_kroppenstedtii	0.178875	0.770971	-0.164951	NA	NA	NA	NA	NA	NA	NA	NA	NA	NA	NA	NA	NA	NA	NA	NA	NA	NA	NA	NA	NA	NA	NA	NA
k__Bacteria; p__Actinobacteria; c__Actinobacteria; o__Actinomycetales; f__Corynebacteriaceae; g__Corynebacterium; s__Corynebacterium_matruchotii	0.178875	0.770971	-0.164951	NA	NA	NA	NA	NA	NA	NA	NA	NA	NA	NA	NA	NA	NA	NA	NA	NA	NA	NA	NA	NA	NA	NA	NA
k__Bacteria; p__Actinobacteria; c__Actinobacteria; o__Actinomycetales; f__Corynebacteriaceae; g__Corynebacterium; s__Corynebacterium_propinquum	0.0879236	0.770971	0.208522	NA	NA	NA	NA	NA	NA	NA	NA	NA	NA	NA	NA	NA	NA	NA	NA	NA	NA	NA	NA	NA	NA	NA	NA
k__Bacteria; p__Actinobacteria; c__Actinobacteria; o__Actinomycetales; f__Corynebacteriaceae; g__Corynebacterium; s__Corynebacterium_pseudodiphtheriticum	NA	NA	NA	NA	NA	NA	NA	NA	NA	NA	NA	NA	NA	NA	NA	NA	NA	NA	NA	NA	NA	NA	NA	NA	NA	NA	NA
k__Bacteria; p__Actinobacteria; c__Actinobacteria; o__Actinomycetales; f__Corynebacteriaceae; g__Corynebacterium; s__Corynebacterium_pseudogenitalium	0.178875	0.770971	-0.164951	NA	NA	NA	NA	NA	NA	NA	NA	NA	NA	NA	NA	NA	NA	NA	NA	NA	NA	NA	NA	NA	NA	NA	NA
k__Bacteria; p__Actinobacteria; c__Actinobacteria; o__Actinomycetales; f__Corynebacteriaceae; g__Corynebacterium; s__Corynebacterium_pyruviciproducens	NA	NA	NA	NA	NA	NA	NA	NA	NA	NA	NA	NA	NA	NA	NA	NA	NA	NA	NA	NA	NA	NA	NA	NA	NA	NA	NA
k__Bacteria; p__Actinobacteria; c__Actinobacteria; o__Actinomycetales; f__Corynebacteriaceae; g__Corynebacterium; s__Corynebacterium_tuberculostearicum	NA	NA	NA	NA	NA	NA	NA	NA	NA	NA	NA	NA	NA	NA	NA	NA	NA	NA	NA	NA	NA	NA	NA	NA	NA	NA	NA
k__Bacteria; p__Actinobacteria; c__Actinobacteria; o__Actinomycetales; f__Corynebacteriaceae; g__Corynebacterium; s__Corynebacterium_variabile	NA	NA	NA	NA	NA	NA	NA	NA	NA	NA	NA	NA	NA	NA	NA	NA	NA	NA	NA	NA	NA	NA	NA	NA	NA	NA	NA
k__Bacteria; p__Actinobacteria; c__Actinobacteria; o__Actinomycetales; f__Dermabacteraceae; g__Brachybacterium; s__Brachybacterium_squillarum	NA	NA	NA	NA	NA	NA	NA	NA	NA	NA	NA	NA	NA	NA	NA	NA	NA	NA	NA	NA	NA	NA	NA	NA	NA	NA	NA
k__Bacteria; p__Actinobacteria; c__Actinobacteria; o__Actinomycetales; f__Dermabacteraceae; g__Brachybacterium; s__Brachybacterium_unclassified	NA	NA	NA	NA	NA	NA	NA	NA	NA	NA	NA	NA	NA	NA	NA	NA	NA	NA	NA	NA	NA	NA	NA	NA	NA	NA	NA
k__Bacteria; p__Actinobacteria; c__Actinobacteria; o__Actinomycetales; f__Micrococcaceae; g__Kocuria; s__Kocuria_rhizophila	0.162804	0.770971	0.171175	0.0995692	0.570844	0.214649	0.358786	0.776678	-0.120576	0.485359	0.991132	0.0918148	0.287727	0.968989	0.139511	0.886661	0.969451	-0.0187943	0.100217	0.684132	0.214249	0.113007	0.754064	0.206731	0.142248	0.756594	0.19172
k__Bacteria; p__Actinobacteria; c__Actinobacteria; o__Actinomycetales; f__Micrococcaceae; g__Kocuria; s__Kocuria_unclassified	0.994947	0.998779	-0.000782496	0.0968614	0.570844	0.216343	0.188921	0.776678	-0.171959	0.878183	0.997978	-0.0202105	0.829393	0.968989	-0.0284105	0.196411	0.819774	-0.16913	0.0221236	0.372072	0.295008	0.472517	0.929231	0.0945241	0.229601	0.77311	0.157441
k__Bacteria; p__Actinobacteria; c__Actinobacteria; o__Actinomycetales; f__Micrococcaceae; g__Rothia; s__Rothia_aeria	0.179114	0.770971	-0.164861	0.230805	0.688663	0.15704	0.731667	0.959167	0.0451975	0.736661	0.997978	-0.0443244	0.085488	0.968989	-0.223893	0.757378	0.969451	-0.0407223	0.419292	0.878347	0.106206	0.299242	0.914483	-0.136253	0.620359	0.855909	-0.0652527
k__Bacteria; p__Actinobacteria; c__Actinobacteria; o__Actinomycetales; f__Micrococcaceae; g__Rothia; s__Rothia_dentocariosa	0.540385	0.9943	-0.0755382	0.522872	0.852863	-0.0841077	0.00399397	0.776678	-0.366324	0.0966439	0.991132	-0.216481	0.221251	0.968989	-0.160264	0.100218	0.79889	-0.214248	0.969551	0.997838	0.00503385	0.670173	0.95424	0.056122	0.0106107	0.354013	-0.327616
k__Bacteria; p__Actinobacteria; c__Actinobacteria; o__Actinomycetales; f__Micrococcaceae; g__Rothia; s__Rothia_mucilaginosa	0.112653	0.770971	-0.194141	0.461066	0.820193	-0.0969735	0.386175	0.794381	-0.113906	0.650322	0.997978	-0.0597267	0.622503	0.968989	-0.0648537	0.451466	0.929067	-0.0990527	0.720952	0.946958	-0.0470773	0.366525	0.92437	-0.118661	0.0326774	0.545118	-0.276181
k__Bacteria; p__Actinobacteria; c__Actinobacteria; o__Actinomycetales; f__Micrococcaceae; g__Rothia; s__Rothia_unclassified	0.678561	0.9943	-0.0511725	0.114951	0.570844	-0.205647	0.709191	0.959167	0.0491515	0.177364	0.991132	-0.176486	0.560617	0.968989	-0.0766276	0.463928	0.929067	-0.0963583	0.637907	0.940332	0.0620035	0.56829	0.93373	-0.0751369	0.420712	0.774195	0.105884
k__Bacteria; p__Actinobacteria; c__Actinobacteria; o__Actinomycetales; f__Nocardiaceae; g__Rhodococcus; s__Rhodococcus_erythropolis	0.109049	0.770971	0.196073	0.977219	0.988368	-0.00376577	0.358786	0.776678	-0.120576	0.346178	0.991132	-0.12375	0.886311	0.968989	-0.0188528	0.158907	0.79889	-0.184184	0.316364	0.799044	-0.131556	0.797489	0.95424	-0.0338288	0.423478	0.774195	-0.105258
k__Bacteria; p__Actinobacteria; c__Actinobacteria; o__Actinomycetales; f__Propionibacteriaceae; g__Propionibacterium; s__Propionibacterium_acnes	0.881681	0.99498	0.0183887	0.977219	0.988368	-0.00376577	0.358786	0.776678	-0.120576	0.346178	0.991132	-0.12375	0.886311	0.968989	-0.0188528	0.158907	0.79889	-0.184184	0.316364	0.799044	-0.131556	0.797489	0.95424	-0.0338288	0.423478	0.774195	-0.105258
k__Bacteria; p__Actinobacteria; c__Actinobacteria; o__Actinomycetales; f__Propionibacteriaceae; g__Propionibacterium; s__Propionibacterium_avidum	0.178875	0.770971	-0.164951	NA	NA	NA	NA	NA	NA	NA	NA	NA	NA	NA	NA	NA	NA	NA	NA	NA	NA	NA	NA	NA	NA	NA	NA
k__Bacteria; p__Actinobacteria; c__Actinobacteria; o__Actinomycetales; f__Propionibacteriaceae; g__Propionibacterium; s__Propionibacterium_freudenreichii	0.120986	0.770971	-0.189849	0.627003	0.916773	-0.0640181	0.231683	0.776678	0.156748	1	1	0	0.405594	0.968989	-0.109346	0.440357	0.929067	-0.101489	0.886665	0.980138	0.0187938	0.668738	0.95424	0.0563813	0.423478	0.774195	-0.105258
k__Bacteria; p__Actinobacteria; c__Actinobacteria; o__Actinomycetales; f__Propionibacteriaceae; g__Propionibacterium; s__Propionibacterium_propionicum	0.700568	0.9943	-0.047488	0.80986	0.975522	0.0317217	0.536805	0.918045	-0.0813169	0.659412	0.997978	-0.0580709	0.808408	0.968989	-0.0319685	0.342709	0.844179	-0.124636	0.946728	0.997838	0.00881117	0.708205	0.95424	-0.0493261	0.589443	0.83127	-0.0710746
k__Bacteria; p__Actinobacteria; c__Actinobacteria; o__Bifidobacteriales; f__Bifidobacteriaceae; g__Alloscardovia; s__Alloscardovia_omnicolens	0.376468	0.90478	-0.108952	0.464706	0.820193	0.0961915	0.333545	0.776678	0.127004	0.877867	0.997978	0.0202634	0.702264	0.968989	0.0503787	0.678482	0.966487	0.0546255	0.247322	0.799044	0.151677	0.903359	0.975097	-0.0160109	0.924862	0.969784	-0.0124367
k__Bacteria; p__Actinobacteria; c__Actinobacteria; o__Bifidobacteriales; f__Bifidobacteriaceae; g__Bifidobacterium; s__Bifidobacterium_adolescentis	0.506478	0.992898	0.0819456	0.431796	0.820193	-0.10339	0.328385	0.776678	-0.128355	0.767025	0.997978	-0.0390551	0.835862	0.968989	0.0273177	0.85578	0.969451	0.0239644	0.0175767	0.372072	-0.305592	0.470947	0.929231	-0.0948581	0.191149	0.771591	-0.171109
k__Bacteria; p__Actinobacteria; c__Actinobacteria; o__Bifidobacteriales; f__Bifidobacteriaceae; g__Bifidobacterium; s__Bifidobacterium_animalis	0.1665	0.770971	0.169705	0.378013	0.800263	0.115863	0.235411	0.776678	0.155519	0.410515	0.991132	0.108211	0.0490858	0.968989	0.255193	0.0727432	0.79889	0.23336	0.117546	0.703398	0.204221	0.855671	0.967221	-0.0239827	0.597971	0.83127	0.0694556
k__Bacteria; p__Actinobacteria; c__Actinobacteria; o__Bifidobacteriales; f__Bifidobacteriaceae; g__Bifidobacterium; s__Bifidobacterium_bifidum	0.632179	0.9943	0.0590911	0.0304865	0.565436	-0.279618	0.390908	0.794381	0.112782	0.717603	0.997978	0.0476667	0.833431	0.968989	0.027728	0.658443	0.966487	-0.0582471	0.0223041	0.372072	-0.294628	0.0799068	0.754064	-0.227891	0.336137	0.774195	-0.12633
k__Bacteria; p__Actinobacteria; c__Actinobacteria; o__Bifidobacteriales; f__Bifidobacteriaceae; g__Bifidobacterium; s__Bifidobacterium_breve	0.86349	0.99498	0.0212414	0.304309	0.754604	0.134845	0.563124	0.918045	-0.0761394	0.177364	0.991132	-0.176486	0.240019	0.968989	-0.154017	0.0974908	0.79889	-0.215946	0.831505	0.971246	-0.0280535	0.563685	0.93373	-0.0760303	0.232289	0.77311	-0.156547
k__Bacteria; p__Actinobacteria; c__Actinobacteria; o__Bifidobacteriales; f__Bifidobacteriaceae; g__Bifidobacterium; s__Bifidobacterium_catenulatum	0.713406	0.9943	0.0453579	0.438184	0.820193	-0.10197	0.773817	0.959167	-0.037885	0.781984	0.997978	0.0364818	0.454172	0.968989	0.0984642	0.52336	0.940407	0.0840093	0.146622	0.738827	-0.189681	0.39473	0.929231	-0.111881	0.328958	0.774195	-0.128205
k__Bacteria; p__Actinobacteria; c__Actinobacteria; o__Bifidobacteriales; f__Bifidobacteriaceae; g__Bifidobacterium; s__Bifidobacterium_dentium	0.984605	0.997196	0.00238412	0.951771	0.988368	-0.00797605	0.249367	0.776678	-0.15103	0.555072	0.991132	-0.077711	0.52279	0.968989	-0.0841242	0.239258	0.844179	-0.154264	0.802829	0.962871	-0.0329182	0.0956728	0.754064	0.217099	0.53813	0.80282	-0.0810533
k__Bacteria; p__Actinobacteria; c__Actinobacteria; o__Bifidobacteriales; f__Bifidobacteriaceae; g__Bifidobacterium; s__Bifidobacterium_longum	0.0134129	0.758785	0.298512	0.215001	0.666652	-0.162426	0.168316	0.776678	-0.180183	0.423057	0.991132	0.105353	0.0558108	0.968989	0.248246	0.272001	0.844179	0.144101	0.0984149	0.684132	-0.215367	0.978122	0.98866	-0.00361634	0.987207	0.992197	0.00211443
k__Bacteria; p__Actinobacteria; c__Actinobacteria; o__Bifidobacteriales; f__Bifidobacteriaceae; g__Bifidobacterium; s__Bifidobacterium_minimum	NA	NA	NA	NA	NA	NA	NA	NA	NA	NA	NA	NA	NA	NA	NA	NA	NA	NA	NA	NA	NA	NA	NA	NA	NA	NA	NA
k__Bacteria; p__Actinobacteria; c__Actinobacteria; o__Bifidobacteriales; f__Bifidobacteriaceae; g__Bifidobacterium; s__Bifidobacterium_pseudocatenulatum	0.974702	0.99498	-0.0039183	0.672877	0.933212	-0.0556342	0.26661	0.776678	-0.145715	0.923006	1	0.0127449	0.469456	0.968989	0.0951758	0.53042	0.940407	0.0825913	0.0589868	0.63671	-0.2452	0.501584	0.929231	-0.0884449	0.679668	0.894044	-0.0544123
k__Bacteria; p__Actinobacteria; c__Actinobacteria; o__Bifidobacteriales; f__Bifidobacteriaceae; g__Bifidobacterium; s__Bifidobacterium_pseudolongum	NA	NA	NA	NA	NA	NA	NA	NA	NA	NA	NA	NA	NA	NA	NA	NA	NA	NA	NA	NA	NA	NA	NA	NA	NA	NA	NA
k__Bacteria; p__Actinobacteria; c__Actinobacteria; o__Bifidobacteriales; f__Bifidobacteriaceae; g__Gardnerella; s__Gardnerella_vaginalis	0.431702	0.938256	0.0969228	0.592517	0.897932	-0.0704897	0.912459	0.962278	0.014497	0.95337	1	0.00771118	0.924065	0.982391	0.0125689	0.997279	0.997279	-0.000449792	0.546386	0.939298	-0.0794182	0.762864	0.95424	-0.0397734	0.546336	0.811762	-0.0794281
k__Bacteria; p__Actinobacteria; c__Actinobacteria; o__Bifidobacteriales; f__Bifidobacteriaceae; g__Parascardovia; s__Parascardovia_denticolens	0.94893	0.99498	0.00791387	0.588533	0.897932	0.071248	0.0166005	0.776678	-0.308165	0.337625	0.991132	-0.125945	0.345857	0.968989	-0.123832	0.0102523	0.79889	-0.329061	0.766339	0.946958	-0.0391734	0.846583	0.967221	0.0255108	0.269712	0.774195	-0.144784
k__Bacteria; p__Actinobacteria; c__Actinobacteria; o__Bifidobacteriales; f__Bifidobacteriaceae; g__Scardovia; s__Scardovia_inopinata	0.438638	0.938256	-0.0954767	0.487727	0.821082	0.0913193	0.103265	0.776678	-0.212392	0.0942935	0.991132	-0.217985	0.463828	0.968989	-0.0963798	0.0700013	0.79889	-0.235567	0.394983	0.873245	0.111821	0.867073	0.967221	-0.02207	0.965288	0.984058	-0.00573892
k__Bacteria; p__Actinobacteria; c__Actinobacteria; o__Bifidobacteriales; f__Bifidobacteriaceae; g__Scardovia; s__Scardovia_unclassified	0.867687	0.99498	0.0205824	0.258382	0.709211	0.148221	0.530624	0.918045	0.0825505	0.114773	0.991132	0.205745	0.0710879	0.968989	0.234684	0.273973	0.844179	0.143516	0.563776	0.939298	-0.0760127	0.324158	0.914483	0.129472	0.219642	0.77311	0.160816
k__Bacteria; p__Actinobacteria; c__Actinobacteria; o__Bifidobacteriales; f__Bifidobacteriaceae; g__Scardovia; s__Scardovia_wiggsiae	0.541575	0.9943	-0.0753169	0.98959	0.992294	0.0017206	0.757656	0.959167	-0.0406741	0.956818	1	-0.00714056	0.586945	0.968989	-0.0715508	0.324595	0.844179	-0.129357	0.859226	0.976711	-0.0233858	0.899447	0.975097	0.0166624	0.402459	0.774195	-0.110073
k__Bacteria; p__Actinobacteria; c__Actinobacteria; o__Coriobacteriales; f__Coriobacteriaceae; g__Adlercreutzia; s__Adlercreutzia_equolifaciens	0.622262	0.9943	0.0608144	0.0686613	0.570844	-0.236671	0.850679	0.959167	0.0248217	0.407536	0.991132	0.108897	0.738763	0.968989	0.0439575	0.797313	0.969451	0.0338589	0.0389813	0.476871	-0.267264	0.0526346	0.754064	-0.251437	0.305947	0.774195	-0.134394
k__Bacteria; p__Actinobacteria; c__Actinobacteria; o__Coriobacteriales; f__Coriobacteriaceae; g__Atopobium; s__Atopobium_minutum	0.178875	0.770971	-0.164951	NA	NA	NA	NA	NA	NA	NA	NA	NA	NA	NA	NA	NA	NA	NA	NA	NA	NA	NA	NA	NA	NA	NA	NA
k__Bacteria; p__Actinobacteria; c__Actinobacteria; o__Coriobacteriales; f__Coriobacteriaceae; g__Atopobium; s__Atopobium_parvulum	0.609082	0.9943	-0.0631228	0.500853	0.831733	0.0885957	0.665707	0.938589	-0.0569294	0.872416	0.997978	0.0211753	0.741823	0.968989	0.0434239	0.631001	0.966487	-0.0632777	0.164866	0.758512	0.181631	0.532025	0.929231	0.0822703	0.772801	0.938879	-0.0380597
k__Bacteria; p__Actinobacteria; c__Actinobacteria; o__Coriobacteriales; f__Coriobacteriaceae; g__Atopobium; s__Atopobium_rimae	0.597043	0.9943	-0.0652505	0.675259	0.933212	0.055205	0.625611	0.922758	0.0642764	0.906518	1	0.0154852	0.74694	0.968989	-0.0425332	0.177013	0.819774	-0.176627	0.92057	0.987863	0.0131494	0.501474	0.929231	-0.0884676	0.466883	0.781856	-0.0957251
k__Bacteria; p__Actinobacteria; c__Actinobacteria; o__Coriobacteriales; f__Coriobacteriaceae; g__Atopobium; s__Atopobium_sp_ICM58	NA	NA	NA	NA	NA	NA	NA	NA	NA	NA	NA	NA	NA	NA	NA	NA	NA	NA	NA	NA	NA	NA	NA	NA	NA	NA	NA
k__Bacteria; p__Actinobacteria; c__Actinobacteria; o__Coriobacteriales; f__Coriobacteriaceae; g__Atopobium; s__Atopobium_vaginae	0.685582	0.9943	-0.0499924	0.476328	0.820193	-0.093716	0.14446	0.776678	0.190683	0.579794	0.991132	-0.0729192	0.207484	0.968989	-0.165085	0.644219	0.966487	-0.0608438	0.493788	0.913266	-0.090057	0.105857	0.754064	-0.210848	0.293797	0.774195	-0.137783
k__Bacteria; p__Actinobacteria; c__Actinobacteria; o__Coriobacteriales; f__Coriobacteriaceae; g__Collinsella; s__Collinsella_aerofaciens	0.885896	0.99498	0.0177291	0.00403515	0.188249	-0.365941	0.763078	0.959167	0.0397364	0.979668	1	-0.0033608	0.538591	0.968989	-0.0809616	0.857901	0.969451	-0.0236082	0.00567163	0.198679	-0.352965	0.0683669	0.754064	-0.236916	0.0164236	0.436364	-0.308645
k__Bacteria; p__Actinobacteria; c__Actinobacteria; o__Coriobacteriales; f__Coriobacteriaceae; g__Collinsella; s__Collinsella_intestinalis	0.461693	0.959794	0.0907587	0.213373	0.666652	-0.162996	0.188921	0.776678	-0.171959	0.947794	1	-0.00863455	0.629569	0.968989	-0.0635426	0.694912	0.966487	-0.0516859	0.425913	0.878347	-0.104709	0.031311	0.754064	0.278301	0.859078	0.945987	0.0234106
k__Bacteria; p__Actinobacteria; c__Actinobacteria; o__Coriobacteriales; f__Coriobacteriaceae; g__Collinsella; s__Collinsella_stercoris	NA	NA	NA	NA	NA	NA	NA	NA	NA	NA	NA	NA	NA	NA	NA	NA	NA	NA	NA	NA	NA	NA	NA	NA	NA	NA	NA
k__Bacteria; p__Actinobacteria; c__Actinobacteria; o__Coriobacteriales; f__Coriobacteriaceae; g__Collinsella; s__Collinsella_tanakaei	0.499876	0.989794	-0.0832183	0.949065	0.988368	-0.00842414	0.567078	0.918045	-0.0753717	0.880025	0.997978	0.0199028	0.723321	0.968989	-0.0466609	0.990799	0.996228	-0.00152072	0.249765	0.799044	-0.150905	0.112387	0.754064	-0.20708	0.158553	0.771591	-0.184338
k__Bacteria; p__Actinobacteria; c__Actinobacteria; o__Coriobacteriales; f__Coriobacteriaceae; g__Collinsella; s__Collinsella_unclassified	0.536532	0.9943	0.0762561	0.363224	0.798224	0.119474	0.190775	0.776678	0.171251	0.258152	0.991132	0.148292	0.560748	0.968989	0.076602	0.819908	0.969451	-0.030016	0.561224	0.939298	-0.0765093	0.428967	0.929231	-0.104023	0.869692	0.947113	-0.0216313
k__Bacteria; p__Actinobacteria; c__Actinobacteria; o__Coriobacteriales; f__Coriobacteriaceae; g__Coriobacteriaceae_noname; s__Coriobacteriaceae_bacterium_phI	0.0966487	0.770971	0.203125	0.166008	0.603217	-0.181149	0.589793	0.918045	-0.0710078	0.349118	0.991132	-0.123004	0.789883	0.968989	-0.0351285	0.762486	0.969451	-0.0398387	0.177956	0.777499	-0.176249	0.262326	0.914483	-0.147014	0.153666	0.771591	-0.186489
k__Bacteria; p__Actinobacteria; c__Actinobacteria; o__Coriobacteriales; f__Coriobacteriaceae; g__Cryptobacterium; s__Cryptobacterium_curtum	0.878985	0.99498	0.018811	0.659792	0.933212	0.0580019	0.188921	0.776678	-0.171959	0.177364	0.991132	-0.176486	0.274983	0.968989	-0.143217	0.0251064	0.79889	-0.28903	0.736722	0.946958	0.0443138	0.544089	0.929231	-0.079872	0.660593	0.878398	-0.0578564
k__Bacteria; p__Actinobacteria; c__Actinobacteria; o__Coriobacteriales; f__Coriobacteriaceae; g__Eggerthella; s__Eggerthella_lenta	0.355338	0.874	0.113831	0.366956	0.798602	-0.118555	0.212842	0.776678	0.163183	0.493155	0.991132	0.0901885	0.988758	0.993493	0.00185815	0.995308	0.997279	0.000775415	0.602305	0.940332	-0.0686367	0.246016	0.914483	-0.152092	0.282328	0.774195	-0.141068
k__Bacteria; p__Actinobacteria; c__Actinobacteria; o__Coriobacteriales; f__Coriobacteriaceae; g__Eggerthella; s__Eggerthella_sp_1_3_56FAA	0.761863	0.9943	0.0374294	0.141662	0.570844	-0.191997	0.982661	0.988416	0.00286598	0.177364	0.991132	-0.176486	0.692752	0.968989	-0.0520709	0.31321	0.844179	-0.132409	0.930893	0.993228	-0.0114358	0.359357	0.92437	-0.120433	0.44089	0.774195	-0.101372
k__Bacteria; p__Actinobacteria; c__Actinobacteria; o__Coriobacteriales; f__Coriobacteriaceae; g__Eggerthella; s__Eggerthella_unclassified	0.240025	0.834311	0.144409	0.469755	0.820193	-0.095112	0.286048	0.776678	0.139993	0.547706	0.991132	0.0791581	0.625192	0.968989	0.0643541	0.858601	0.969451	0.0234908	0.895217	0.983997	0.0173671	0.823929	0.963	0.0293349	0.959597	0.980981	-0.0066805
k__Bacteria; p__Actinobacteria; c__Actinobacteria; o__Coriobacteriales; f__Coriobacteriaceae; g__Gordonibacter; s__Gordonibacter_pamelaeae	0.939962	0.99498	0.00930596	0.00271659	0.166165	-0.380392	0.761603	0.959167	-0.0399914	0.737711	0.997978	-0.044141	0.523472	0.968989	-0.0839868	0.201035	0.819774	-0.167422	0.0196181	0.372072	-0.300583	0.0963148	0.754064	-0.21669	0.0557559	0.676872	-0.2483
k__Bacteria; p__Actinobacteria; c__Actinobacteria; o__Coriobacteriales; f__Coriobacteriaceae; g__Olsenella; s__Olsenella_profusa	0.685735	0.9943	-0.0499667	0.699579	0.935642	0.0508556	0.63044	0.922758	-0.0633815	0.842059	0.997978	0.0262726	0.299217	0.968989	-0.13626	0.0796549	0.79889	-0.228077	0.991447	0.997838	-0.00141359	0.52542	0.929231	0.0835947	0.845621	0.945987	-0.0256728
k__Bacteria; p__Actinobacteria; c__Actinobacteria; o__Coriobacteriales; f__Coriobacteriaceae; g__Olsenella; s__Olsenella_uli	0.576271	0.9943	0.0689672	0.185013	0.640564	0.173467	0.618802	0.922758	0.0655428	0.659514	0.997978	0.0580524	0.293087	0.968989	-0.137984	0.0697238	0.79889	-0.235794	0.993008	0.997838	0.00115572	0.898231	0.975097	0.0168649	0.448189	0.77839	-0.099768
k__Bacteria; p__Actinobacteria; c__Actinobacteria; o__Coriobacteriales; f__Coriobacteriaceae; g__Olsenella; s__Olsenella_unclassified	0.934594	0.99498	-0.0101397	0.0987418	0.570844	-0.215163	0.693423	0.959167	0.0519512	0.922336	1	0.0128561	0.577959	0.968989	-0.0732715	0.472455	0.929067	-0.0945374	0.762862	0.946958	-0.0397738	0.954685	0.98866	-0.00749361	0.399113	0.774195	-0.110853
k__Bacteria; p__Actinobacteria; c__Actinobacteria; o__Coriobacteriales; f__Coriobacteriaceae; g__Slackia; s__Slackia_exigua	0.263011	0.834311	0.13764	0.668155	0.933212	0.0564865	0.1315	0.776678	0.19694	0.346178	0.991132	-0.12375	0.709951	0.968989	-0.0490172	0.440357	0.929067	0.101489	0.886665	0.980138	-0.0187938	0.0885801	0.754064	-0.221766	0.819567	0.943894	-0.0300738
k__Bacteria; p__Actinobacteria; c__Actinobacteria; o__Coriobacteriales; f__Coriobacteriaceae; g__Slackia; s__Slackia_piriformis	0.306302	0.840555	-0.125898	0.163705	0.602866	-0.182123	0.495621	0.89861	-0.0896768	0.415974	0.991132	-0.106961	0.23258	0.968989	-0.156451	0.108371	0.79889	-0.209377	0.632649	0.940332	-0.0629731	0.0356908	0.754064	-0.271755	0.117634	0.756594	-0.204173
k__Bacteria; p__Actinobacteria; c__Actinobacteria; o__Coriobacteriales; f__Coriobacteriaceae; g__Slackia; s__Slackia_unclassified	0.41551	0.938256	0.100352	0.895162	0.988368	0.0173764	0.452362	0.867229	-0.0988575	0.849087	0.997978	-0.0250895	0.600411	0.968989	-0.0689942	0.125566	0.79889	-0.199961	0.376925	0.859201	0.116125	0.456387	0.929231	0.097984	0.905219	0.958449	-0.0157013
k__Bacteria; p__Bacteroidetes; c__Bacteroidetes_noname; o__Bacteroidetes_noname; f__Bacteroidetes_noname; g__Bacteroidetes_noname; s__Bacteroidetes_bacterium_oral_taxon_272	NA	NA	NA	NA	NA	NA	NA	NA	NA	NA	NA	NA	NA	NA	NA	NA	NA	NA	NA	NA	NA	NA	NA	NA	NA	NA	NA
k__Bacteria; p__Bacteroidetes; c__Bacteroidetes_noname; o__Bacteroidetes_noname; f__Bacteroidetes_noname; g__Bacteroidetes_noname; s__Bacteroidetes_oral_taxon_274	NA	NA	NA	NA	NA	NA	NA	NA	NA	NA	NA	NA	NA	NA	NA	NA	NA	NA	NA	NA	NA	NA	NA	NA	NA	NA	NA
k__Bacteria; p__Bacteroidetes; c__Bacteroidia; o__Bacteroidales; f__Bacteroidaceae; g__Bacteroides; s__Bacteroides_caccae	0.317017	0.854005	-0.123162	0.872245	0.988368	-0.0212039	0.110012	0.776678	0.208431	0.617539	0.997978	0.0657785	0.781811	0.968989	0.0365114	0.24562	0.844179	0.152218	0.336555	0.812941	-0.126222	0.118789	0.778494	-0.203546	0.900284	0.958449	-0.016523
k__Bacteria; p__Bacteroidetes; c__Bacteroidia; o__Bacteroidales; f__Bacteroidaceae; g__Bacteroides; s__Bacteroides_cellulosilyticus	0.419036	0.938256	0.0995984	0.480667	0.820193	-0.0928003	0.899493	0.959167	-0.0166547	0.524837	0.991132	-0.0837119	0.423872	0.968989	0.105169	0.668612	0.966487	0.056404	0.567541	0.939298	0.0752819	0.811134	0.963	0.0315051	0.655084	0.87743	-0.0588582
k__Bacteria; p__Bacteroidetes; c__Bacteroidia; o__Bacteroidales; f__Bacteroidaceae; g__Bacteroides; s__Bacteroides_clarus	0.786313	0.9943	-0.0334875	0.285148	0.734829	-0.140252	0.0644544	0.776678	0.240252	0.653885	0.997978	-0.0590767	0.250632	0.968989	0.150632	0.246768	0.844179	0.151853	0.984556	0.997838	-0.00255277	0.308656	0.914483	-0.13365	0.712363	0.901507	0.048591
k__Bacteria; p__Bacteroidetes; c__Bacteroidia; o__Bacteroidales; f__Bacteroidaceae; g__Bacteroides; s__Bacteroides_coprocola	0.00156541	0.481162	-0.37626	0.619692	0.916773	-0.065377	0.789883	0.959167	0.0351286	0.890864	1	0.0180931	0.443197	0.968989	-0.100863	0.755977	0.969451	0.0409649	0.141071	0.729199	0.192277	0.346358	0.914483	0.123705	0.803192	0.943894	-0.0328564
k__Bacteria; p__Bacteroidetes; c__Bacteroidia; o__Bacteroidales; f__Bacteroidaceae; g__Bacteroides; s__Bacteroides_coprophilus	0.803842	0.9943	0.030682	0.995095	0.995095	0.000810744	0.39248	0.794381	-0.112411	0.851466	0.997978	-0.0246893	0.933101	0.983395	-0.0110697	0.947513	0.987158	0.00868111	0.711739	0.946958	-0.0487011	0.634243	0.95424	0.0626788	0.554021	0.813302	-0.0779169
k__Bacteria; p__Bacteroidetes; c__Bacteroidia; o__Bacteroidales; f__Bacteroidaceae; g__Bacteroides; s__Bacteroides_dorei	0.224644	0.834311	0.149192	0.934596	0.988368	0.0108218	0.288262	0.776678	0.139357	0.0418032	0.991132	0.263655	0.0558335	0.968989	0.248224	0.00279092	0.511194	0.379427	0.26901	0.799044	-0.144994	0.51164	0.929231	-0.0863847	0.497588	0.787803	0.0892697
k__Bacteria; p__Bacteroidetes; c__Bacteroidia; o__Bacteroidales; f__Bacteroidaceae; g__Bacteroides; s__Bacteroides_eggerthii	0.779391	0.9943	-0.0346	0.0631068	0.570844	-0.241439	0.328454	0.776678	-0.128337	0.65029	0.997978	-0.0597326	0.919168	0.982391	0.0133822	0.871008	0.969451	-0.0214109	0.966628	0.997838	-0.00551727	0.978579	0.98866	-0.00354094	0.00250092	0.354013	-0.383334
k__Bacteria; p__Bacteroidetes; c__Bacteroidia; o__Bacteroidales; f__Bacteroidaceae; g__Bacteroides; s__Bacteroides_faecis	0.534372	0.9943	0.0766596	0.980289	0.988368	-0.00325816	0.151827	0.776678	0.187312	0.683586	0.997978	-0.0537094	0.505311	0.968989	0.0876791	0.875798	0.969451	0.0206093	0.679892	0.946958	0.0543721	0.788466	0.95424	-0.0353711	0.61381	0.850069	-0.0664753
k__Bacteria; p__Bacteroidetes; c__Bacteroidia; o__Bacteroidales; f__Bacteroidaceae; g__Bacteroides; s__Bacteroides_finegoldii	0.429937	0.938256	-0.0972929	0.948976	0.988368	-0.00843886	0.801692	0.959167	0.0331119	0.506959	0.991132	0.0873413	0.132001	0.968989	0.19669	0.0720246	0.79889	0.233932	0.808547	0.966569	-0.031945	0.0432761	0.754064	-0.261851	0.636162	0.863599	-0.062325
k__Bacteria; p__Bacteroidetes; c__Bacteroidia; o__Bacteroidales; f__Bacteroidaceae; g__Bacteroides; s__Bacteroides_fluxus	0.427779	0.938256	0.0977468	0.963727	0.988368	0.00599711	0.781359	0.959167	0.036589	0.147562	0.991132	0.189248	0.334955	0.968989	0.126637	0.636442	0.966487	0.0622733	0.150353	0.741915	0.187976	0.338209	0.914483	0.125794	0.437658	0.774195	0.102086
k__Bacteria; p__Bacteroidetes; c__Bacteroidia; o__Bacteroidales; f__Bacteroidaceae; g__Bacteroides; s__Bacteroides_fragilis	0.290275	0.837576	0.130109	0.348065	0.792077	-0.123271	0.226806	0.776678	0.158378	0.738418	0.997978	0.0440177	0.727337	0.968989	0.0459561	0.233064	0.844179	0.156291	0.329187	0.810817	-0.128144	0.18733	0.914483	-0.17257	0.336475	0.774195	0.126243
k__Bacteria; p__Bacteroidetes; c__Bacteroidia; o__Bacteroidales; f__Bacteroidaceae; g__Bacteroides; s__Bacteroides_gallinarum	NA	NA	NA	NA	NA	NA	NA	NA	NA	NA	NA	NA	NA	NA	NA	NA	NA	NA	NA	NA	NA	NA	NA	NA	NA	NA	NA
k__Bacteria; p__Bacteroidetes; c__Bacteroidia; o__Bacteroidales; f__Bacteroidaceae; g__Bacteroides; s__Bacteroides_intestinalis	0.819122	0.9943	-0.0282491	0.94186	0.988368	-0.00961761	0.821882	0.959167	0.0296814	0.173649	0.991132	0.177987	0.731817	0.968989	-0.0451713	0.194023	0.819774	-0.170023	0.935688	0.994314	-0.0106406	0.816854	0.963	0.030534	0.4192	0.774195	-0.106227
k__Bacteria; p__Bacteroidetes; c__Bacteroidia; o__Bacteroidales; f__Bacteroidaceae; g__Bacteroides; s__Bacteroides_massiliensis	0.895167	0.99498	0.0162802	0.472785	0.820193	-0.0944672	0.49003	0.89861	-0.0908388	0.127062	0.991132	-0.199189	0.454003	0.968989	-0.0985008	0.278649	0.844179	-0.14214	0.973055	0.997838	-0.00445422	0.686576	0.95424	-0.0531741	0.00801752	0.354013	-0.339208
k__Bacteria; p__Bacteroidetes; c__Bacteroidia; o__Bacteroidales; f__Bacteroidaceae; g__Bacteroides; s__Bacteroides_nordii	0.145353	0.770971	0.178471	0.0333353	0.565436	0.275187	0.32132	0.776678	0.130227	0.0489391	0.991132	0.255352	0.263135	0.968989	0.146767	0.524452	0.940407	0.0837894	0.824535	0.971246	0.0292323	0.964638	0.98866	0.00584646	0.977008	0.987774	0.00380067
k__Bacteria; p__Bacteroidetes; c__Bacteroidia; o__Bacteroidales; f__Bacteroidaceae; g__Bacteroides; s__Bacteroides_oleiciplenus	0.254655	0.834311	-0.140052	0.262814	0.709211	0.146865	0.603952	0.918045	0.0683261	0.11871	0.991132	0.203589	0.1258	0.968989	0.19984	0.112997	0.79889	0.206737	0.627646	0.940332	0.0638988	0.407075	0.929231	-0.109004	0.359913	0.774195	0.120295
k__Bacteria; p__Bacteroidetes; c__Bacteroidia; o__Bacteroidales; f__Bacteroidaceae; g__Bacteroides; s__Bacteroides_ovatus	0.612468	0.9943	-0.0625277	0.780416	0.972003	-0.036751	0.367398	0.776678	0.118446	0.273603	0.991132	0.143625	0.315434	0.968989	0.131807	0.147107	0.79889	0.189457	0.645451	0.940332	-0.060618	0.978448	0.98866	0.00356249	0.0784082	0.676872	0.229002
k__Bacteria; p__Bacteroidetes; c__Bacteroidia; o__Bacteroidales; f__Bacteroidaceae; g__Bacteroides; s__Bacteroides_plebeius	0.00243011	0.481162	-0.361837	0.937011	0.988368	-0.0104213	0.81775	0.959167	-0.0303819	0.986512	1	0.00222936	0.901733	0.976212	-0.0162817	0.711039	0.966487	0.0488248	0.73226	0.946958	0.0450938	0.811682	0.963	-0.0314119	0.0992748	0.707317	-0.214831
k__Bacteria; p__Bacteroidetes; c__Bacteroidia; o__Bacteroidales; f__Bacteroidaceae; g__Bacteroides; s__Bacteroides_salyersiae	0.415118	0.938256	-0.100435	0.176604	0.627545	-0.176792	0.133467	0.776678	0.195961	0.604478	0.997978	-0.0682271	0.643009	0.968989	-0.0610657	0.746015	0.969451	0.0426942	0.838526	0.971246	-0.0268683	0.315525	0.914483	-0.131783	0.532557	0.802726	-0.082164
k__Bacteria; p__Bacteroidetes; c__Bacteroidia; o__Bacteroidales; f__Bacteroidaceae; g__Bacteroides; s__Bacteroides_sp_1_1_6	NA	NA	NA	NA	NA	NA	NA	NA	NA	NA	NA	NA	NA	NA	NA	NA	NA	NA	NA	NA	NA	NA	NA	NA	NA	NA	NA
k__Bacteria; p__Bacteroidetes; c__Bacteroidia; o__Bacteroidales; f__Bacteroidaceae; g__Bacteroides; s__Bacteroides_sp_2_1_22	NA	NA	NA	NA	NA	NA	NA	NA	NA	NA	NA	NA	NA	NA	NA	NA	NA	NA	NA	NA	NA	NA	NA	NA	NA	NA	NA
k__Bacteria; p__Bacteroidetes; c__Bacteroidia; o__Bacteroidales; f__Bacteroidaceae; g__Bacteroides; s__Bacteroides_sp_3_1_19	0.228948	0.834311	-0.147832	0.288859	0.734829	-0.139187	0.104902	0.776678	0.211414	0.177364	0.991132	-0.176486	0.743633	0.968989	0.0431086	0.814092	0.969451	0.0310026	0.137185	0.729199	0.194141	0.474622	0.929231	-0.0940774	0.595288	0.83127	0.0699638
k__Bacteria; p__Bacteroidetes; c__Bacteroidia; o__Bacteroidales; f__Bacteroidaceae; g__Bacteroides; s__Bacteroides_sp_4_3_47FAA	NA	NA	NA	NA	NA	NA	NA	NA	NA	NA	NA	NA	NA	NA	NA	NA	NA	NA	NA	NA	NA	NA	NA	NA	NA	NA	NA
k__Bacteria; p__Bacteroidetes; c__Bacteroidia; o__Bacteroidales; f__Bacteroidaceae; g__Bacteroides; s__Bacteroides_stercoris	0.697356	0.9943	0.0480233	0.271737	0.721897	0.144179	0.0600355	0.776678	0.244223	0.07927	0.991132	0.228361	0.892421	0.968989	0.0178334	0.62176	0.966487	0.0649919	0.536251	0.939298	-0.081427	0.224425	0.914483	-0.159182	0.79657	0.943894	-0.0339856
k__Bacteria; p__Bacteroidetes; c__Bacteroidia; o__Bacteroidales; f__Bacteroidaceae; g__Bacteroides; s__Bacteroides_thetaiotaomicron	0.422202	0.938256	0.0989253	0.0909161	0.570844	0.220198	0.0376084	0.776678	0.269098	0.284061	0.991132	0.140566	0.325947	0.968989	0.128999	0.0562271	0.79889	0.247839	0.336695	0.812941	0.126186	0.847746	0.967221	-0.0253151	0.270706	0.774195	0.144487
k__Bacteria; p__Bacteroidetes; c__Bacteroidia; o__Bacteroidales; f__Bacteroidaceae; g__Bacteroides; s__Bacteroides_uniformis	0.804436	0.9943	0.0305872	0.67988	0.933212	0.0543742	0.107703	0.776678	0.209765	0.303855	0.991132	0.134971	0.200246	0.968989	0.167711	0.00306494	0.511194	0.376054	0.647136	0.940332	-0.0603094	0.578967	0.940187	-0.0730778	0.262753	0.774195	0.146883
k__Bacteria; p__Bacteroidetes; c__Bacteroidia; o__Bacteroidales; f__Bacteroidaceae; g__Bacteroides; s__Bacteroides_vulgatus	0.108261	0.770971	-0.196502	0.69326	0.935391	0.0519803	0.588073	0.918045	0.0713356	0.848343	0.997978	0.0252146	0.569664	0.968989	-0.0748708	0.674055	0.966487	0.0554219	0.97254	0.997838	-0.00453945	0.279017	0.914483	0.142032	0.361927	0.774195	0.119795
k__Bacteria; p__Bacteroidetes; c__Bacteroidia; o__Bacteroidales; f__Bacteroidaceae; g__Bacteroides; s__Bacteroides_xylanisolvens	0.689791	0.9943	-0.049287	0.0303567	0.565436	0.279828	0.00437748	0.776678	0.362885	0.0400073	0.991132	0.265928	0.438527	0.968989	0.101894	0.148213	0.79889	0.18895	0.854283	0.976704	-0.0242158	0.389761	0.929231	-0.113054	0.425866	0.774195	0.10472
k__Bacteria; p__Bacteroidetes; c__Bacteroidia; o__Bacteroidales; f__Bacteroidales_noname; g__Bacteroidales_noname; s__Bacteroidales_bacterium_ph8	0.959238	0.99498	-0.00631504	0.253813	0.709211	-0.149636	0.686265	0.95764	-0.0532297	0.919107	1	0.0133923	0.626979	0.968989	0.0640225	0.471963	0.929067	0.0946419	0.232921	0.799044	-0.156338	0.624246	0.95424	-0.0645297	0.592179	0.83127	-0.070554
k__Bacteria; p__Bacteroidetes; c__Bacteroidia; o__Bacteroidales; f__Porphyromonadaceae; g__Barnesiella; s__Barnesiella_intestinihominis	0.777576	0.9943	0.0348921	0.12991	0.570844	-0.197739	0.58796	0.918045	-0.0713572	0.96755	1	0.00536481	0.384059	0.968989	0.114411	0.311319	0.844179	0.132923	0.0358295	0.468347	-0.271559	0.476861	0.929231	-0.0936033	0.2591	0.774195	-0.148001
k__Bacteria; p__Bacteroidetes; c__Bacteroidia; o__Bacteroidales; f__Porphyromonadaceae; g__Butyricimonas; s__Butyricimonas_synergistica	0.198539	0.822908	0.157864	0.474073	0.820193	0.0941937	0.500569	0.89861	0.0886542	0.935778	1	0.0106258	0.890497	0.968989	-0.0181542	0.703419	0.966487	0.0501739	0.329154	0.810817	0.128153	0.453642	0.929231	-0.0985793	0.178412	0.771591	0.176067
k__Bacteria; p__Bacteroidetes; c__Bacteroidia; o__Bacteroidales; f__Porphyromonadaceae; g__Coprobacter; s__Coprobacter_fastidiosus	0.407251	0.938256	0.10213	0.48463	0.820193	-0.0919676	0.538984	0.918045	-0.0808836	0.560684	0.991132	-0.0766146	0.285647	0.968989	0.140108	0.219107	0.844179	0.161001	0.759807	0.946958	0.0403019	0.698631	0.95424	0.051024	0.592948	0.83127	0.0704079
k__Bacteria; p__Bacteroidetes; c__Bacteroidia; o__Bacteroidales; f__Porphyromonadaceae; g__Odoribacter; s__Odoribacter_laneus	0.433817	0.938256	0.0964805	0.668155	0.933212	0.0564865	0.358786	0.776678	-0.120576	0.346178	0.991132	-0.12375	0.373781	0.968989	0.116887	0.627637	0.966487	0.0639006	0.217297	0.799044	0.161626	0.196373	0.914483	0.169144	0.158866	0.771591	-0.184202
k__Bacteria; p__Bacteroidetes; c__Bacteroidia; o__Bacteroidales; f__Porphyromonadaceae; g__Odoribacter; s__Odoribacter_splanchnicus	0.948848	0.99498	-0.00792667	0.975286	0.988368	0.00408532	0.354694	0.776678	0.121598	0.871629	0.997978	-0.021307	0.861105	0.968989	-0.0230705	0.808016	0.969451	0.0320353	0.838842	0.971246	-0.026815	0.253503	0.914483	-0.149733	0.893909	0.956585	-0.0175853
k__Bacteria; p__Bacteroidetes; c__Bacteroidia; o__Bacteroidales; f__Porphyromonadaceae; g__Odoribacter; s__Odoribacter_unclassified	0.216616	0.834311	0.15178	0.0284382	0.565436	-0.283023	0.103265	0.776678	-0.212392	0.89535	1	-0.017345	0.976785	0.99302	-0.00383748	0.573358	0.966487	-0.0741573	0.709242	0.946958	-0.0491425	0.795696	0.95424	0.0341349	0.166896	0.771591	-0.180776
k__Bacteria; p__Bacteroidetes; c__Bacteroidia; o__Bacteroidales; f__Porphyromonadaceae; g__Parabacteroides; s__Parabacteroides_distasonis	0.00371176	0.489952	0.347295	0.41979	0.820193	0.106093	0.882197	0.959167	-0.0195398	0.364309	0.991132	0.119206	0.23368	0.968989	0.156088	0.344797	0.844179	0.124102	0.0112992	0.276453	0.324956	0.0309331	0.754064	0.278901	0.193657	0.771591	0.170161
k__Bacteria; p__Bacteroidetes; c__Bacteroidia; o__Bacteroidales; f__Porphyromonadaceae; g__Parabacteroides; s__Parabacteroides_goldsteinii	0.571663	0.9943	0.0698	0.847576	0.988368	0.0253436	0.593331	0.918045	-0.0703351	0.47958	0.991132	-0.0930293	0.298456	0.968989	-0.136473	0.292959	0.844179	-0.13802	0.153639	0.741915	0.186501	0.861118	0.967221	0.0230684	0.43471	0.774195	-0.102741
k__Bacteria; p__Bacteroidetes; c__Bacteroidia; o__Bacteroidales; f__Porphyromonadaceae; g__Parabacteroides; s__Parabacteroides_johnsonii	0.0254856	0.770971	0.270844	0.196572	0.663637	-0.16907	0.11274	0.776678	0.206881	0.773156	0.997978	-0.0379986	0.280721	0.968989	0.141534	0.245587	0.844179	0.152228	0.465261	0.90305	0.0960726	0.240694	0.914483	-0.153799	0.551802	0.813302	-0.0783522
k__Bacteria; p__Bacteroidetes; c__Bacteroidia; o__Bacteroidales; f__Porphyromonadaceae; g__Parabacteroides; s__Parabacteroides_merdae	0.374946	0.90478	-0.109298	0.383188	0.800263	0.114619	0.572056	0.918045	0.0744086	0.347847	0.991132	0.123326	0.0797856	0.968989	0.22798	0.155414	0.79889	0.185714	0.742192	0.946958	-0.0433597	0.796613	0.95424	-0.0339784	0.460017	0.781856	0.0971996
k__Bacteria; p__Bacteroidetes; c__Bacteroidia; o__Bacteroidales; f__Porphyromonadaceae; g__Parabacteroides; s__Parabacteroides_unclassified	0.0315971	0.770971	0.260965	0.383068	0.800263	0.114648	0.503511	0.89861	0.0880487	0.492145	0.991132	0.0903984	0.19008	0.968989	0.171516	0.133483	0.79889	0.195953	0.431652	0.878347	0.103423	0.870769	0.9684	-0.021451	0.845195	0.945987	-0.0257445
k__Bacteria; p__Bacteroidetes; c__Bacteroidia; o__Bacteroidales; f__Porphyromonadaceae; g__Porphyromonas; s__Porphyromonas_asaccharolytica	0.820624	0.9943	-0.0280105	0.141541	0.570844	0.192054	0.358786	0.776678	-0.120576	0.448048	0.991132	0.0997987	0.547586	0.968989	0.0791817	0.345032	0.844179	0.124042	0.668738	0.940332	0.0563813	0.345046	0.914483	0.124039	0.359913	0.774195	0.120295
k__Bacteria; p__Bacteroidetes; c__Bacteroidia; o__Bacteroidales; f__Porphyromonadaceae; g__Porphyromonas; s__Porphyromonas_bennonis	0.307779	0.840555	0.125517	0.179308	0.627545	0.17571	0.156102	0.776678	0.185411	0.576255	0.991132	0.0735992	0.990177	0.993493	0.00162355	0.705909	0.966487	-0.0497325	0.75209	0.946958	0.0416387	0.476291	0.929231	0.0937239	0.412034	0.774195	0.107862
k__Bacteria; p__Bacteroidetes; c__Bacteroidia; o__Bacteroidales; f__Porphyromonadaceae; g__Porphyromonas; s__Porphyromonas_endodontalis	0.109049	0.770971	0.196073	0.977219	0.988368	-0.00376577	0.358786	0.776678	-0.120576	0.346178	0.991132	-0.12375	0.886311	0.968989	-0.0188528	0.158907	0.79889	-0.184184	0.316364	0.799044	-0.131556	0.797489	0.95424	-0.0338288	0.423478	0.774195	-0.105258
k__Bacteria; p__Bacteroidetes; c__Bacteroidia; o__Bacteroidales; f__Porphyromonadaceae; g__Porphyromonas; s__Porphyromonas_gingivalis	NA	NA	NA	NA	NA	NA	NA	NA	NA	NA	NA	NA	NA	NA	NA	NA	NA	NA	NA	NA	NA	NA	NA	NA	NA	NA	NA
k__Bacteria; p__Bacteroidetes; c__Bacteroidia; o__Bacteroidales; f__Porphyromonadaceae; g__Porphyromonas; s__Porphyromonas_somerae	0.820624	0.9943	-0.0280105	0.141541	0.570844	0.192054	0.358786	0.776678	-0.120576	0.448048	0.991132	0.0997987	0.547586	0.968989	0.0791817	0.345032	0.844179	0.124042	0.668738	0.940332	0.0563813	0.345046	0.914483	0.124039	0.359913	0.774195	0.120295
k__Bacteria; p__Bacteroidetes; c__Bacteroidia; o__Bacteroidales; f__Porphyromonadaceae; g__Porphyromonas; s__Porphyromonas_uenonis	0.820624	0.9943	-0.0280105	0.141541	0.570844	0.192054	0.358786	0.776678	-0.120576	0.448048	0.991132	0.0997987	0.547586	0.968989	0.0791817	0.345032	0.844179	0.124042	0.668738	0.940332	0.0563813	0.345046	0.914483	0.124039	0.359913	0.774195	0.120295
k__Bacteria; p__Bacteroidetes; c__Bacteroidia; o__Bacteroidales; f__Prevotellaceae; g__Alloprevotella; s__Alloprevotella_unclassified	NA	NA	NA	NA	NA	NA	NA	NA	NA	NA	NA	NA	NA	NA	NA	NA	NA	NA	NA	NA	NA	NA	NA	NA	NA	NA	NA
k__Bacteria; p__Bacteroidetes; c__Bacteroidia; o__Bacteroidales; f__Prevotellaceae; g__Paraprevotella; s__Paraprevotella_clara	0.493297	0.989794	-0.0844952	0.447834	0.820193	-0.0998455	0.278644	0.776678	-0.142141	0.113154	0.991132	-0.206649	0.811733	0.968989	-0.0314033	0.877771	0.969451	0.0202794	0.797368	0.959602	0.0338495	0.648469	0.95424	0.0600655	0.23628	0.77311	-0.155234
k__Bacteria; p__Bacteroidetes; c__Bacteroidia; o__Bacteroidales; f__Prevotellaceae; g__Paraprevotella; s__Paraprevotella_unclassified	0.199493	0.822908	-0.157533	0.227173	0.683382	-0.158254	0.452821	0.867229	-0.0987578	0.0860324	0.991132	-0.223515	0.496143	0.968989	-0.0895687	0.803988	0.969451	-0.0327209	0.737795	0.946958	0.0441265	0.470111	0.929231	0.0950362	0.0947131	0.707317	-0.217714
k__Bacteria; p__Bacteroidetes; c__Bacteroidia; o__Bacteroidales; f__Prevotellaceae; g__Paraprevotella; s__Paraprevotella_xylaniphila	0.853558	0.99498	-0.0228035	0.449356	0.820193	-0.0995129	0.334569	0.776678	-0.126737	0.255145	0.991132	-0.149222	0.820932	0.968989	0.0298425	0.600594	0.966487	0.0689597	0.474187	0.90305	-0.0941696	0.640125	0.95424	0.0615955	0.121883	0.756594	-0.201891
k__Bacteria; p__Bacteroidetes; c__Bacteroidia; o__Bacteroidales; f__Prevotellaceae; g__Prevotella; s__Prevotella_bivia	0.0405118	0.770971	-0.249104	0.190678	0.654007	0.171288	0.144295	0.776678	0.19076	0.200361	0.991132	0.167669	0.86754	0.968989	-0.0219917	0.907617	0.985527	0.0153023	0.91824	0.987863	-0.0135363	0.584094	0.940187	0.0720953	0.410752	0.774195	0.108157
k__Bacteria; p__Bacteroidetes; c__Bacteroidia; o__Bacteroidales; f__Prevotellaceae; g__Prevotella; s__Prevotella_buccae	NA	NA	NA	NA	NA	NA	NA	NA	NA	NA	NA	NA	NA	NA	NA	NA	NA	NA	NA	NA	NA	NA	NA	NA	NA	NA	NA
k__Bacteria; p__Bacteroidetes; c__Bacteroidia; o__Bacteroidales; f__Prevotellaceae; g__Prevotella; s__Prevotella_buccalis	0.178875	0.770971	0.164951	0.315453	0.756676	0.131802	0.148319	0.776678	0.188902	0.260073	0.991132	0.147702	0.709951	0.968989	0.0490172	0.710811	0.966487	-0.0488651	0.753776	0.946958	0.0413463	0.627646	0.95424	0.0638988	0.954535	0.979416	-0.00751844
k__Bacteria; p__Bacteroidetes; c__Bacteroidia; o__Bacteroidales; f__Prevotellaceae; g__Prevotella; s__Prevotella_copri	0.399511	0.936132	-0.103816	0.0302023	0.565436	-0.280079	0.610722	0.922365	0.0670538	0.67631	0.997978	-0.055016	0.341896	0.968989	-0.124845	0.416121	0.925554	-0.106928	0.166862	0.758512	-0.18079	0.0488255	0.754064	-0.255477	0.00366136	0.354013	-0.369552
k__Bacteria; p__Bacteroidetes; c__Bacteroidia; o__Bacteroidales; f__Prevotellaceae; g__Prevotella; s__Prevotella_disiens	0.911749	0.99498	-0.0136937	0.106404	0.570844	0.210525	0.578198	0.918045	0.0732257	0.200767	0.991132	0.16752	0.220519	0.968989	0.160515	0.140147	0.79889	0.192717	0.372058	0.858776	0.117306	0.643741	0.95424	0.0609314	0.242841	0.77311	0.153107
k__Bacteria; p__Bacteroidetes; c__Bacteroidia; o__Bacteroidales; f__Prevotellaceae; g__Prevotella; s__Prevotella_histicola	0.178875	0.770971	-0.164951	NA	NA	NA	NA	NA	NA	NA	NA	NA	NA	NA	NA	NA	NA	NA	NA	NA	NA	NA	NA	NA	NA	NA	NA
k__Bacteria; p__Bacteroidetes; c__Bacteroidia; o__Bacteroidales; f__Prevotellaceae; g__Prevotella; s__Prevotella_melaninogenica	0.178875	0.770971	-0.164951	NA	NA	NA	NA	NA	NA	NA	NA	NA	NA	NA	NA	NA	NA	NA	NA	NA	NA	NA	NA	NA	NA	NA	NA
k__Bacteria; p__Bacteroidetes; c__Bacteroidia; o__Bacteroidales; f__Prevotellaceae; g__Prevotella; s__Prevotella_oris	NA	NA	NA	NA	NA	NA	NA	NA	NA	NA	NA	NA	NA	NA	NA	NA	NA	NA	NA	NA	NA	NA	NA	NA	NA	NA	NA
k__Bacteria; p__Bacteroidetes; c__Bacteroidia; o__Bacteroidales; f__Prevotellaceae; g__Prevotella; s__Prevotella_oulorum	NA	NA	NA	NA	NA	NA	NA	NA	NA	NA	NA	NA	NA	NA	NA	NA	NA	NA	NA	NA	NA	NA	NA	NA	NA	NA	NA
k__Bacteria; p__Bacteroidetes; c__Bacteroidia; o__Bacteroidales; f__Prevotellaceae; g__Prevotella; s__Prevotella_salivae	0.109049	0.770971	0.196073	0.977219	0.988368	-0.00376577	0.358786	0.776678	-0.120576	0.346178	0.991132	-0.12375	0.886311	0.968989	-0.0188528	0.158907	0.79889	-0.184184	0.316364	0.799044	-0.131556	0.797489	0.95424	-0.0338288	0.423478	0.774195	-0.105258
k__Bacteria; p__Bacteroidetes; c__Bacteroidia; o__Bacteroidales; f__Prevotellaceae; g__Prevotella; s__Prevotella_stercorea	0.00787195	0.694558	-0.319693	0.313536	0.756676	-0.132321	0.165141	0.776678	0.181514	0.632281	0.997978	0.0630412	0.21085	0.968989	-0.163886	0.199832	0.819774	-0.167863	0.236385	0.799044	-0.155199	0.329027	0.914483	-0.128187	0.289795	0.774195	-0.138919
k__Bacteria; p__Bacteroidetes; c__Bacteroidia; o__Bacteroidales; f__Prevotellaceae; g__Prevotella; s__Prevotella_timonensis	0.820624	0.9943	-0.0280105	0.141541	0.570844	0.192054	0.358786	0.776678	-0.120576	0.448048	0.991132	0.0997987	0.547586	0.968989	0.0791817	0.345032	0.844179	0.124042	0.668738	0.940332	0.0563813	0.345046	0.914483	0.124039	0.359913	0.774195	0.120295
k__Bacteria; p__Bacteroidetes; c__Bacteroidia; o__Bacteroidales; f__Rikenellaceae; g__Alistipes; s__Alistipes_finegoldii	0.65984	0.9943	-0.0543422	0.752796	0.95557	-0.0415163	0.711153	0.959167	0.0488047	0.775706	0.997978	0.03756	0.165004	0.968989	0.181572	0.214335	0.844179	0.162659	0.572782	0.939298	-0.0742684	0.0715122	0.754064	-0.234343	0.902881	0.958449	0.0160906
k__Bacteria; p__Bacteroidetes; c__Bacteroidia; o__Bacteroidales; f__Rikenellaceae; g__Alistipes; s__Alistipes_indistinctus	0.173443	0.770971	0.167007	0.392539	0.809335	0.112397	0.205437	0.776678	0.165821	0.877434	0.997978	0.0203359	0.244016	0.968989	0.15273	0.195969	0.819774	0.169295	0.387527	0.867209	0.113584	0.429511	0.929231	-0.103901	0.692867	0.897385	-0.0520503
k__Bacteria; p__Bacteroidetes; c__Bacteroidia; o__Bacteroidales; f__Rikenellaceae; g__Alistipes; s__Alistipes_onderdonkii	0.219493	0.834311	-0.150845	0.446217	0.820193	-0.1002	0.75002	0.959167	0.041998	0.760835	0.997978	0.0401241	0.727734	0.968989	0.0458865	0.502439	0.940407	0.0882691	0.682034	0.946958	0.0539878	0.538775	0.929231	0.0809252	0.894029	0.956585	0.0175652
k__Bacteria; p__Bacteroidetes; c__Bacteroidia; o__Bacteroidales; f__Rikenellaceae; g__Alistipes; s__Alistipes_putredinis	0.730107	0.9943	-0.0426063	0.414246	0.820193	-0.107356	0.210427	0.776678	0.164036	0.976905	1	-0.00381758	0.485133	0.968989	0.0918621	0.16724	0.818361	0.180632	0.588047	0.940332	0.0713405	0.0839835	0.754064	-0.22495	0.778157	0.938879	-0.0371388
k__Bacteria; p__Bacteroidetes; c__Bacteroidia; o__Bacteroidales; f__Rikenellaceae; g__Alistipes; s__Alistipes_senegalensis	0.68853	0.9943	-0.0494982	0.379915	0.800263	-0.115404	0.124578	0.776678	0.200474	0.874677	0.997978	-0.0207969	0.72167	0.968989	0.0469511	0.547287	0.951915	0.0792407	0.742299	0.946958	0.0433411	0.50165	0.929231	-0.0884315	0.928587	0.970915	-0.0118185
k__Bacteria; p__Bacteroidetes; c__Bacteroidia; o__Bacteroidales; f__Rikenellaceae; g__Alistipes; s__Alistipes_shahii	0.888919	0.99498	0.0172564	0.807326	0.975522	-0.0321526	0.127693	0.776678	0.198866	0.763755	0.997978	-0.0396195	0.542781	0.968989	0.0801308	0.303875	0.844179	0.134965	0.895517	0.983997	0.0173171	0.230657	0.914483	-0.157089	0.794765	0.943894	0.0342939
k__Bacteria; p__Bacteroidetes; c__Bacteroidia; o__Bacteroidales; f__Rikenellaceae; g__Alistipes; s__Alistipes_sp_AP11	0.682962	0.9943	-0.0504322	0.469708	0.820193	0.0951221	0.15429	0.776678	0.186212	0.405754	0.991132	0.109309	0.287699	0.968989	0.139518	0.122161	0.79889	0.201743	0.303465	0.799044	0.135079	0.25808	0.914483	-0.148315	0.0286227	0.504614	0.282708
k__Bacteria; p__Bacteroidetes; c__Bacteroidia; o__Bacteroidales; f__Rikenellaceae; g__Alistipes; s__Alistipes_unclassified	0.272092	0.834311	0.135076	0.970075	0.988368	-0.00494703	0.386956	0.794381	-0.11372	0.163706	0.991132	0.182122	0.595807	0.968989	-0.0698654	0.29493	0.844179	-0.137463	0.43868	0.878347	0.10186	0.0535399	0.754064	0.250512	0.721474	0.9099	-0.0469856
k__Bacteria; p__Candidatus_Saccharibacteria; c__Candidatus_Saccharibacteria_noname; o__Candidatus_Saccharibacteria_noname; f__Candidatus_Saccharibacteria_noname; g__Candidatus_Saccharibacteria_noname; s__candidate_division_TM7_single_cell_isolate_TM7b	0.063534	0.770971	-0.226272	0.668155	0.933212	0.0564865	0.358786	0.776678	-0.120576	0.346178	0.991132	-0.12375	0.473743	0.968989	-0.0942639	0.668729	0.966487	-0.0563829	0.44037	0.878347	-0.101486	0.345046	0.914483	-0.124039	0.176873	0.771591	-0.176683
k__Bacteria; p__Candidatus_Saccharibacteria; c__Candidatus_Saccharibacteria_noname; o__Candidatus_Saccharibacteria_noname; f__Candidatus_Saccharibacteria_noname; g__Candidatus_Saccharibacteria_noname; s__candidate_division_TM7_single_cell_isolate_TM7c	0.0459446	0.770971	-0.242904	0.823933	0.981764	-0.0293342	0.103265	0.776678	-0.212392	0.533191	0.991132	-0.0820373	0.209758	0.968989	-0.164274	0.125852	0.79889	-0.199813	0.643038	0.940332	-0.0610603	0.901432	0.975097	-0.0163318	0.207431	0.771591	-0.165104
k__Bacteria; p__Firmicutes; c__Bacilli; o__Bacillales; f__Bacillaceae; g__Bacillus; s__Bacillus_amyloliquefaciens	NA	NA	NA	NA	NA	NA	NA	NA	NA	NA	NA	NA	NA	NA	NA	NA	NA	NA	NA	NA	NA	NA	NA	NA	NA	NA	NA
k__Bacteria; p__Firmicutes; c__Bacilli; o__Bacillales; f__Bacillaceae; g__Geobacillus; s__Geobacillus_unclassified	NA	NA	NA	NA	NA	NA	NA	NA	NA	NA	NA	NA	NA	NA	NA	NA	NA	NA	NA	NA	NA	NA	NA	NA	NA	NA	NA
k__Bacteria; p__Firmicutes; c__Bacilli; o__Bacillales; f__Bacillales_noname; g__Gemella; s__Gemella_haemolysans	0.331119	0.857014	0.11965	0.0423855	0.570844	-0.262936	0.279864	0.776678	-0.141784	0.208203	0.991132	-0.164828	0.0391073	0.968989	-0.267098	0.0041787	0.511194	-0.364632	0.152028	0.741915	-0.187221	0.136159	0.815995	-0.19464	0.0288744	0.504614	-0.282281
k__Bacteria; p__Firmicutes; c__Bacilli; o__Bacillales; f__Bacillales_noname; g__Gemella; s__Gemella_morbillorum	0.800234	0.9943	-0.0312581	0.362905	0.798224	-0.119553	0.670055	0.938589	-0.0561433	0.753012	0.997978	0.0414788	0.938408	0.983395	-0.0101897	0.856081	0.969451	-0.0239138	0.82943	0.971246	0.0284042	0.234984	0.914483	0.155659	0.523172	0.80268	-0.0840473
k__Bacteria; p__Firmicutes; c__Bacilli; o__Bacillales; f__Bacillales_noname; g__Gemella; s__Gemella_sanguinis	0.60777	0.9943	-0.0633538	0.00856692	0.34934	-0.336504	0.117277	0.776678	-0.204368	0.0916962	0.991132	-0.219681	0.136674	0.968989	-0.194389	0.0445195	0.79889	-0.260367	0.0370083	0.468347	-0.269917	0.0145024	0.754064	-0.314166	7.02793e-05	0.0257925	-0.49016
k__Bacteria; p__Firmicutes; c__Bacilli; o__Bacillales; f__Bacillales_noname; g__Gemella; s__Gemella_unclassified	0.714573	0.9943	-0.0451649	0.460626	0.820193	-0.0970684	0.978721	0.988416	0.0035173	0.798763	0.997978	0.0336114	0.13917	0.968989	-0.193184	0.109833	0.79889	-0.208533	0.0898829	0.684132	0.220888	0.974071	0.98866	0.00428618	0.443767	0.775535	0.100738
k__Bacteria; p__Firmicutes; c__Bacilli; o__Bacillales; f__Staphylococcaceae; g__Macrococcus; s__Macrococcus_caseolyticus	NA	NA	NA	NA	NA	NA	NA	NA	NA	NA	NA	NA	NA	NA	NA	NA	NA	NA	NA	NA	NA	NA	NA	NA	NA	NA	NA
k__Bacteria; p__Firmicutes; c__Bacilli; o__Bacillales; f__Staphylococcaceae; g__Staphylococcus; s__Staphylococcus_aureus	0.277703	0.834311	0.13352	0.657183	0.933212	-0.0584761	0.248761	0.776678	-0.151222	0.355439	0.991132	-0.121412	0.677363	0.968989	0.0548266	0.482115	0.931244	-0.0924955	0.744621	0.946958	0.0429368	0.423361	0.929231	-0.105284	0.971588	0.987027	0.00469679
k__Bacteria; p__Firmicutes; c__Bacilli; o__Bacillales; f__Staphylococcaceae; g__Staphylococcus; s__Staphylococcus_carnosus	NA	NA	NA	NA	NA	NA	NA	NA	NA	NA	NA	NA	NA	NA	NA	NA	NA	NA	NA	NA	NA	NA	NA	NA	NA	NA	NA
k__Bacteria; p__Firmicutes; c__Bacilli; o__Bacillales; f__Staphylococcaceae; g__Staphylococcus; s__Staphylococcus_epidermidis	0.337732	0.85943	0.118035	0.747399	0.95557	0.0424535	0.665578	0.938589	0.0569527	0.276055	0.991132	-0.142901	0.247626	0.968989	-0.151581	0.85304	0.969451	-0.0244248	0.827734	0.971246	-0.028691	0.549949	0.929231	-0.0787163	0.435833	0.774195	-0.102491
k__Bacteria; p__Firmicutes; c__Bacilli; o__Bacillales; f__Staphylococcaceae; g__Staphylococcus; s__Staphylococcus_haemolyticus	0.233936	0.834311	-0.146277	0.886454	0.988368	0.0188288	0.902964	0.959167	0.0160767	1	1	0	0.157592	0.968989	-0.184757	0.797484	0.969451	0.0338297	0.475134	0.90305	0.0939688	0.375289	0.92437	0.116521	0.753747	0.92282	-0.0413514
k__Bacteria; p__Firmicutes; c__Bacilli; o__Bacillales; f__Staphylococcaceae; g__Staphylococcus; s__Staphylococcus_pasteuri	0.162804	0.770971	0.171175	0.0995692	0.570844	0.214649	0.358786	0.776678	-0.120576	0.485359	0.991132	0.0918148	0.287727	0.968989	0.139511	0.886661	0.969451	-0.0187943	0.100217	0.684132	0.214249	0.113007	0.754064	0.206731	0.142248	0.756594	0.19172
k__Bacteria; p__Firmicutes; c__Bacilli; o__Bacillales; f__Staphylococcaceae; g__Staphylococcus; s__Staphylococcus_simiae	NA	NA	NA	NA	NA	NA	NA	NA	NA	NA	NA	NA	NA	NA	NA	NA	NA	NA	NA	NA	NA	NA	NA	NA	NA	NA	NA
k__Bacteria; p__Firmicutes; c__Bacilli; o__Bacillales; f__Staphylococcaceae; g__Staphylococcus; s__Staphylococcus_warneri	0.162804	0.770971	0.171175	0.0995692	0.570844	0.214649	0.358786	0.776678	-0.120576	0.485359	0.991132	0.0918148	0.287727	0.968989	0.139511	0.886661	0.969451	-0.0187943	0.100217	0.684132	0.214249	0.113007	0.754064	0.206731	0.142248	0.756594	0.19172
k__Bacteria; p__Firmicutes; c__Bacilli; o__Bacillales; f__Staphylococcaceae; g__Staphylococcus; s__Staphylococcus_xylosus	NA	NA	NA	NA	NA	NA	NA	NA	NA	NA	NA	NA	NA	NA	NA	NA	NA	NA	NA	NA	NA	NA	NA	NA	NA	NA	NA
k__Bacteria; p__Firmicutes; c__Bacilli; o__Lactobacillales; f__Aerococcaceae; g__Abiotrophia; s__Abiotrophia_defectiva	0.636128	0.9943	-0.058408	0.482497	0.820193	0.0924152	0.577729	0.918045	0.0733157	0.292691	0.991132	-0.138096	0.578991	0.968989	-0.0730732	0.224679	0.844179	-0.159096	0.278573	0.799044	0.142162	0.247075	0.914483	-0.151755	0.851589	0.945987	0.0246686
k__Bacteria; p__Firmicutes; c__Bacilli; o__Lactobacillales; f__Aerococcaceae; g__Facklamia; s__Facklamia_hominis	NA	NA	NA	NA	NA	NA	NA	NA	NA	NA	NA	NA	NA	NA	NA	NA	NA	NA	NA	NA	NA	NA	NA	NA	NA	NA	NA
k__Bacteria; p__Firmicutes; c__Bacilli; o__Lactobacillales; f__Carnobacteriaceae; g__Carnobacterium; s__Carnobacterium_maltaromaticum	0.354458	0.874	0.114038	0.34416	0.792077	0.124265	0.815999	0.959167	-0.0306789	0.656513	0.997978	-0.0585981	0.506066	0.968989	-0.0875241	0.0397046	0.79889	-0.266319	0.662397	0.940332	0.0575291	0.832957	0.967221	-0.0278082	0.685635	0.895473	-0.0533425
k__Bacteria; p__Firmicutes; c__Bacilli; o__Lactobacillales; f__Carnobacteriaceae; g__Granulicatella; s__Granulicatella_adiacens	0.740298	0.9943	-0.0409373	0.696398	0.935642	0.0514214	0.784007	0.959167	0.0361349	0.555263	0.991132	-0.0776735	0.71168	0.968989	-0.0487115	0.24428	0.844179	-0.152646	0.0992343	0.684132	0.214856	0.564259	0.93373	0.0759187	0.88544	0.956399	-0.0189981
k__Bacteria; p__Firmicutes; c__Bacilli; o__Lactobacillales; f__Carnobacteriaceae; g__Granulicatella; s__Granulicatella_elegans	0.0980428	0.770971	-0.202298	0.126291	0.570844	0.199586	0.0896334	0.776678	0.221055	0.169629	0.991132	0.179638	0.626564	0.968989	-0.0640995	0.886661	0.969451	0.0187943	0.345046	0.822284	0.124039	0.475134	0.929231	0.0939688	0.263654	0.774195	0.14661
k__Bacteria; p__Firmicutes; c__Bacilli; o__Lactobacillales; f__Carnobacteriaceae; g__Granulicatella; s__Granulicatella_unclassified	0.203435	0.827718	-0.156178	0.688764	0.933212	-0.0527829	0.596842	0.918045	0.0696693	0.480382	0.991132	-0.0928602	0.952462	0.983395	-0.0078615	0.541268	0.94593	-0.0804305	0.62396	0.940332	-0.0645828	0.00919723	0.754064	-0.333583	0.215177	0.77311	-0.162364
k__Bacteria; p__Firmicutes; c__Bacilli; o__Lactobacillales; f__Enterococcaceae; g__Enterococcus; s__Enterococcus_asini	NA	NA	NA	NA	NA	NA	NA	NA	NA	NA	NA	NA	NA	NA	NA	NA	NA	NA	NA	NA	NA	NA	NA	NA	NA	NA	NA
k__Bacteria; p__Firmicutes; c__Bacilli; o__Lactobacillales; f__Enterococcaceae; g__Enterococcus; s__Enterococcus_avium	0.326084	0.855057	0.120893	0.273491	0.721897	0.143659	0.983797	0.988416	0.00267818	0.695208	0.997978	-0.0516332	0.69466	0.968989	0.0517308	0.941058	0.987158	0.00975049	0.211386	0.799044	0.163696	0.102729	0.754064	0.212716	0.5838	0.83127	0.0721517
k__Bacteria; p__Firmicutes; c__Bacilli; o__Lactobacillales; f__Enterococcaceae; g__Enterococcus; s__Enterococcus_casseliflavus	NA	NA	NA	NA	NA	NA	NA	NA	NA	NA	NA	NA	NA	NA	NA	NA	NA	NA	NA	NA	NA	NA	NA	NA	NA	NA	NA
k__Bacteria; p__Firmicutes; c__Bacilli; o__Lactobacillales; f__Enterococcaceae; g__Enterococcus; s__Enterococcus_cecorum	0.109049	0.770971	0.196073	0.977219	0.988368	-0.00376577	0.358786	0.776678	-0.120576	0.346178	0.991132	-0.12375	0.886311	0.968989	-0.0188528	0.158907	0.79889	-0.184184	0.316364	0.799044	-0.131556	0.797489	0.95424	-0.0338288	0.423478	0.774195	-0.105258
k__Bacteria; p__Firmicutes; c__Bacilli; o__Lactobacillales; f__Enterococcaceae; g__Enterococcus; s__Enterococcus_durans	NA	NA	NA	NA	NA	NA	NA	NA	NA	NA	NA	NA	NA	NA	NA	NA	NA	NA	NA	NA	NA	NA	NA	NA	NA	NA	NA
k__Bacteria; p__Firmicutes; c__Bacilli; o__Lactobacillales; f__Enterococcaceae; g__Enterococcus; s__Enterococcus_faecalis	0.525386	0.9943	0.078347	0.4293	0.820193	-0.103949	0.333098	0.776678	-0.127121	0.162328	0.991132	-0.18271	0.619182	0.968989	-0.0654721	0.801773	0.969451	-0.0330982	0.440071	0.878347	-0.101552	0.662557	0.95424	-0.0575	0.0646776	0.676872	-0.240058
k__Bacteria; p__Firmicutes; c__Bacilli; o__Lactobacillales; f__Enterococcaceae; g__Enterococcus; s__Enterococcus_faecium	0.0105236	0.694558	0.308337	0.757793	0.95557	0.0406504	0.866364	0.959167	-0.0221888	0.474688	0.991132	0.0940634	0.130227	0.968989	0.197579	0.597121	0.966487	0.0696164	0.557644	0.939298	-0.0772077	0.625269	0.95424	0.0643397	0.188662	0.771591	0.172058
k__Bacteria; p__Firmicutes; c__Bacilli; o__Lactobacillales; f__Enterococcaceae; g__Enterococcus; s__Enterococcus_gallinarum	0.479962	0.981722	0.0871112	0.287945	0.734829	-0.139448	0.590899	0.918045	-0.0707975	0.415974	0.991132	-0.106961	0.615695	0.968989	0.0661228	0.918238	0.987158	0.0135366	0.204221	0.799044	0.166261	0.0814937	0.754064	0.226733	0.258272	0.774195	0.148255
k__Bacteria; p__Firmicutes; c__Bacilli; o__Lactobacillales; f__Enterococcaceae; g__Enterococcus; s__Enterococcus_hirae	NA	NA	NA	NA	NA	NA	NA	NA	NA	NA	NA	NA	NA	NA	NA	NA	NA	NA	NA	NA	NA	NA	NA	NA	NA	NA	NA
k__Bacteria; p__Firmicutes; c__Bacilli; o__Lactobacillales; f__Enterococcaceae; g__Enterococcus; s__Enterococcus_mundtii	NA	NA	NA	NA	NA	NA	NA	NA	NA	NA	NA	NA	NA	NA	NA	NA	NA	NA	NA	NA	NA	NA	NA	NA	NA	NA	NA
k__Bacteria; p__Firmicutes; c__Bacilli; o__Lactobacillales; f__Enterococcaceae; g__Enterococcus; s__Enterococcus_raffinosus	0.196068	0.822908	0.158726	0.841538	0.988368	0.0263604	0.358786	0.776678	-0.120576	0.346178	0.991132	-0.12375	0.509983	0.968989	0.0867228	0.511302	0.940407	0.0864537	0.753776	0.946958	-0.0413463	0.217297	0.914483	0.161626	0.100173	0.707317	0.214276
k__Bacteria; p__Firmicutes; c__Bacilli; o__Lactobacillales; f__Enterococcaceae; g__Tetragenococcus; s__Tetragenococcus_halophilus	NA	NA	NA	NA	NA	NA	NA	NA	NA	NA	NA	NA	NA	NA	NA	NA	NA	NA	NA	NA	NA	NA	NA	NA	NA	NA	NA
k__Bacteria; p__Firmicutes; c__Bacilli; o__Lactobacillales; f__Lactobacillaceae; g__Lactobacillus; s__Lactobacillus_acidophilus	0.939763	0.99498	0.00933682	0.439513	0.820193	0.101676	0.0782857	0.776678	0.229094	0.301132	0.991132	0.135726	0.262201	0.968989	0.147052	0.263701	0.844179	0.146595	0.407075	0.878347	0.109004	0.753776	0.95424	-0.0413463	0.475079	0.781856	0.0939806
k__Bacteria; p__Firmicutes; c__Bacilli; o__Lactobacillales; f__Lactobacillaceae; g__Lactobacillus; s__Lactobacillus_amylovorus	0.705404	0.9943	0.0466841	0.406194	0.820193	-0.109207	0.783787	0.959167	0.0361727	0.301132	0.991132	0.135726	0.238244	0.968989	0.154593	0.176916	0.819774	0.176666	0.797489	0.959602	-0.0338288	0.977261	0.98866	0.00375875	0.954535	0.979416	-0.00751844
k__Bacteria; p__Firmicutes; c__Bacilli; o__Lactobacillales; f__Lactobacillaceae; g__Lactobacillus; s__Lactobacillus_animalis	NA	NA	NA	NA	NA	NA	NA	NA	NA	NA	NA	NA	NA	NA	NA	NA	NA	NA	NA	NA	NA	NA	NA	NA	NA	NA	NA
k__Bacteria; p__Firmicutes; c__Bacilli; o__Lactobacillales; f__Lactobacillaceae; g__Lactobacillus; s__Lactobacillus_brevis	NA	NA	NA	NA	NA	NA	NA	NA	NA	NA	NA	NA	NA	NA	NA	NA	NA	NA	NA	NA	NA	NA	NA	NA	NA	NA	NA
k__Bacteria; p__Firmicutes; c__Bacilli; o__Lactobacillales; f__Lactobacillaceae; g__Lactobacillus; s__Lactobacillus_casei_paracasei	0.301972	0.837576	0.127021	0.762621	0.95557	-0.0398154	0.843238	0.959167	0.026074	0.740193	0.997978	-0.0437081	0.481201	0.968989	0.0926877	0.828308	0.969451	0.0285939	0.864956	0.976735	0.0224247	0.847739	0.967221	0.0253162	0.815016	0.943894	-0.0308459
k__Bacteria; p__Firmicutes; c__Bacilli; o__Lactobacillales; f__Lactobacillaceae; g__Lactobacillus; s__Lactobacillus_coryniformis	0.109049	0.770971	0.196073	0.977219	0.988368	-0.00376577	0.358786	0.776678	-0.120576	0.346178	0.991132	-0.12375	0.886311	0.968989	-0.0188528	0.158907	0.79889	-0.184184	0.316364	0.799044	-0.131556	0.797489	0.95424	-0.0338288	0.423478	0.774195	-0.105258
k__Bacteria; p__Firmicutes; c__Bacilli; o__Lactobacillales; f__Lactobacillaceae; g__Lactobacillus; s__Lactobacillus_crispatus	0.299745	0.837576	-0.127603	0.275383	0.721897	-0.143099	0.358786	0.776678	-0.120576	0.346178	0.991132	-0.12375	0.626564	0.968989	0.0640995	0.196361	0.819774	0.169149	0.263714	0.799044	-0.146591	0.58765	0.94178	0.0714163	0.475079	0.781856	-0.0939806
k__Bacteria; p__Firmicutes; c__Bacilli; o__Lactobacillales; f__Lactobacillaceae; g__Lactobacillus; s__Lactobacillus_curvatus	0.109049	0.770971	0.196073	0.977219	0.988368	-0.00376577	0.358786	0.776678	-0.120576	0.346178	0.991132	-0.12375	0.886311	0.968989	-0.0188528	0.158907	0.79889	-0.184184	0.316364	0.799044	-0.131556	0.797489	0.95424	-0.0338288	0.423478	0.774195	-0.105258
k__Bacteria; p__Firmicutes; c__Bacilli; o__Lactobacillales; f__Lactobacillaceae; g__Lactobacillus; s__Lactobacillus_delbrueckii	0.120986	0.770971	-0.189849	0.627003	0.916773	-0.0640181	0.231683	0.776678	0.156748	1	1	0	0.405594	0.968989	-0.109346	0.440357	0.929067	-0.101489	0.886665	0.980138	0.0187938	0.668738	0.95424	0.0563813	0.423478	0.774195	-0.105258
k__Bacteria; p__Firmicutes; c__Bacilli; o__Lactobacillales; f__Lactobacillaceae; g__Lactobacillus; s__Lactobacillus_fermentum	0.956553	0.99498	-0.00673131	0.879457	0.988368	-0.0199976	0.424603	0.837791	-0.105004	0.985083	1	0.00246562	0.677982	0.968989	-0.0547152	0.0666867	0.79889	-0.238329	0.957074	0.997838	0.00709818	0.436891	0.929231	0.102257	0.780267	0.938879	-0.0367764
k__Bacteria; p__Firmicutes; c__Bacilli; o__Lactobacillales; f__Lactobacillaceae; g__Lactobacillus; s__Lactobacillus_gasseri	0.528247	0.9943	-0.0778081	0.798622	0.975522	0.0336355	0.0567382	0.776678	-0.247342	0.832756	0.997978	0.0278422	0.875699	0.968989	-0.0206259	0.374201	0.884702	-0.116785	0.495204	0.913266	-0.0897631	0.265714	0.914483	0.145986	0.471584	0.781856	-0.0947225
k__Bacteria; p__Firmicutes; c__Bacilli; o__Lactobacillales; f__Lactobacillaceae; g__Lactobacillus; s__Lactobacillus_gastricus	NA	NA	NA	NA	NA	NA	NA	NA	NA	NA	NA	NA	NA	NA	NA	NA	NA	NA	NA	NA	NA	NA	NA	NA	NA	NA	NA
k__Bacteria; p__Firmicutes; c__Bacilli; o__Lactobacillales; f__Lactobacillaceae; g__Lactobacillus; s__Lactobacillus_helveticus	NA	NA	NA	NA	NA	NA	NA	NA	NA	NA	NA	NA	NA	NA	NA	NA	NA	NA	NA	NA	NA	NA	NA	NA	NA	NA	NA
k__Bacteria; p__Firmicutes; c__Bacilli; o__Lactobacillales; f__Lactobacillaceae; g__Lactobacillus; s__Lactobacillus_iners	NA	NA	NA	NA	NA	NA	NA	NA	NA	NA	NA	NA	NA	NA	NA	NA	NA	NA	NA	NA	NA	NA	NA	NA	NA	NA	NA
k__Bacteria; p__Firmicutes; c__Bacilli; o__Lactobacillales; f__Lactobacillaceae; g__Lactobacillus; s__Lactobacillus_mucosae	0.78166	0.9943	0.034235	0.158129	0.595757	0.184523	0.902964	0.959167	0.0160767	0.346178	0.991132	-0.12375	0.566874	0.968989	-0.0754111	0.511302	0.940407	-0.0864537	0.797489	0.959602	0.0338288	0.931855	0.98866	-0.0112763	0.627603	0.859442	-0.0639068
k__Bacteria; p__Firmicutes; c__Bacilli; o__Lactobacillales; f__Lactobacillaceae; g__Lactobacillus; s__Lactobacillus_oris	NA	NA	NA	NA	NA	NA	NA	NA	NA	NA	NA	NA	NA	NA	NA	NA	NA	NA	NA	NA	NA	NA	NA	NA	NA	NA	NA
k__Bacteria; p__Firmicutes; c__Bacilli; o__Lactobacillales; f__Lactobacillaceae; g__Lactobacillus; s__Lactobacillus_pentosus	NA	NA	NA	NA	NA	NA	NA	NA	NA	NA	NA	NA	NA	NA	NA	NA	NA	NA	NA	NA	NA	NA	NA	NA	NA	NA	NA
k__Bacteria; p__Firmicutes; c__Bacilli; o__Lactobacillales; f__Lactobacillaceae; g__Lactobacillus; s__Lactobacillus_plantarum	0.822536	0.9943	0.027707	0.248234	0.709211	-0.151388	0.848126	0.959167	0.0252511	0.259932	0.991132	-0.147745	0.58832	0.968989	-0.0712886	0.268731	0.844179	-0.145078	0.361449	0.850333	-0.119914	0.896133	0.975097	-0.0172146	0.725076	0.911311	-0.0463528
k__Bacteria; p__Firmicutes; c__Bacilli; o__Lactobacillales; f__Lactobacillaceae; g__Lactobacillus; s__Lactobacillus_reuteri	NA	NA	NA	NA	NA	NA	NA	NA	NA	NA	NA	NA	NA	NA	NA	NA	NA	NA	NA	NA	NA	NA	NA	NA	NA	NA	NA
k__Bacteria; p__Firmicutes; c__Bacilli; o__Lactobacillales; f__Lactobacillaceae; g__Lactobacillus; s__Lactobacillus_rhamnosus	0.0305645	0.770971	0.262514	0.873791	0.988368	0.0209451	0.188921	0.776678	-0.171959	0.278654	0.991132	0.142138	0.454028	0.968989	0.0984955	0.643001	0.966487	-0.0610671	0.874024	0.979709	0.0209061	0.0343089	0.754064	0.273745	0.693129	0.897385	0.0520037
k__Bacteria; p__Firmicutes; c__Bacilli; o__Lactobacillales; f__Lactobacillaceae; g__Lactobacillus; s__Lactobacillus_rossiae	0.109049	0.770971	0.196073	0.977219	0.988368	-0.00376577	0.358786	0.776678	-0.120576	0.346178	0.991132	-0.12375	0.886311	0.968989	-0.0188528	0.158907	0.79889	-0.184184	0.316364	0.799044	-0.131556	0.797489	0.95424	-0.0338288	0.423478	0.774195	-0.105258
k__Bacteria; p__Firmicutes; c__Bacilli; o__Lactobacillales; f__Lactobacillaceae; g__Lactobacillus; s__Lactobacillus_ruminis	0.147824	0.770971	-0.1774	0.510523	0.840409	0.0866127	0.358786	0.776678	-0.120576	0.346178	0.991132	-0.12375	0.157592	0.968989	-0.184757	0.088571	0.79889	-0.221773	0.127014	0.703398	0.199214	0.548844	0.929231	-0.0789338	0.84181	0.945987	0.0263146
k__Bacteria; p__Firmicutes; c__Bacilli; o__Lactobacillales; f__Lactobacillaceae; g__Lactobacillus; s__Lactobacillus_sakei	NA	NA	NA	NA	NA	NA	NA	NA	NA	NA	NA	NA	NA	NA	NA	NA	NA	NA	NA	NA	NA	NA	NA	NA	NA	NA	NA
k__Bacteria; p__Firmicutes; c__Bacilli; o__Lactobacillales; f__Lactobacillaceae; g__Lactobacillus; s__Lactobacillus_salivarius	0.745698	0.9943	0.0400561	0.786607	0.972003	-0.0356893	0.409848	0.817469	-0.108364	0.272292	0.991132	-0.144014	0.224958	0.968989	-0.159002	0.150676	0.79889	-0.18783	0.479183	0.90305	-0.093113	0.949387	0.98866	0.00837076	0.334871	0.774195	-0.126659
k__Bacteria; p__Firmicutes; c__Bacilli; o__Lactobacillales; f__Lactobacillaceae; g__Lactobacillus; s__Lactobacillus_sanfranciscensis	NA	NA	NA	NA	NA	NA	NA	NA	NA	NA	NA	NA	NA	NA	NA	NA	NA	NA	NA	NA	NA	NA	NA	NA	NA	NA	NA
k__Bacteria; p__Firmicutes; c__Bacilli; o__Lactobacillales; f__Lactobacillaceae; g__Lactobacillus; s__Lactobacillus_vaginalis	0.567897	0.9943	0.0704828	0.141541	0.570844	-0.192054	0.358786	0.776678	-0.120576	0.855856	0.997978	0.0239517	0.157592	0.968989	-0.184757	0.186456	0.819774	-0.172907	0.127014	0.703398	-0.199214	0.100217	0.754064	-0.214249	0.142248	0.756594	-0.19172
k__Bacteria; p__Firmicutes; c__Bacilli; o__Lactobacillales; f__Lactobacillaceae; g__Pediococcus; s__Pediococcus_acidilactici	NA	NA	NA	NA	NA	NA	NA	NA	NA	NA	NA	NA	NA	NA	NA	NA	NA	NA	NA	NA	NA	NA	NA	NA	NA	NA	NA
k__Bacteria; p__Firmicutes; c__Bacilli; o__Lactobacillales; f__Lactobacillaceae; g__Pediococcus; s__Pediococcus_lolii	NA	NA	NA	NA	NA	NA	NA	NA	NA	NA	NA	NA	NA	NA	NA	NA	NA	NA	NA	NA	NA	NA	NA	NA	NA	NA	NA
k__Bacteria; p__Firmicutes; c__Bacilli; o__Lactobacillales; f__Lactobacillaceae; g__Pediococcus; s__Pediococcus_pentosaceus	NA	NA	NA	NA	NA	NA	NA	NA	NA	NA	NA	NA	NA	NA	NA	NA	NA	NA	NA	NA	NA	NA	NA	NA	NA	NA	NA
k__Bacteria; p__Firmicutes; c__Bacilli; o__Lactobacillales; f__Lactobacillaceae; g__Pediococcus; s__Pediococcus_unclassified	NA	NA	NA	NA	NA	NA	NA	NA	NA	NA	NA	NA	NA	NA	NA	NA	NA	NA	NA	NA	NA	NA	NA	NA	NA	NA	NA
k__Bacteria; p__Firmicutes; c__Bacilli; o__Lactobacillales; f__Leuconostocaceae; g__Leuconostoc; s__Leuconostoc_carnosum	NA	NA	NA	NA	NA	NA	NA	NA	NA	NA	NA	NA	NA	NA	NA	NA	NA	NA	NA	NA	NA	NA	NA	NA	NA	NA	NA
k__Bacteria; p__Firmicutes; c__Bacilli; o__Lactobacillales; f__Leuconostocaceae; g__Leuconostoc; s__Leuconostoc_citreum	0.752845	0.9943	-0.0388927	0.256242	0.709211	-0.148882	0.706893	0.959167	-0.0495582	0.794733	0.997978	-0.0342994	0.533062	0.968989	-0.0820631	0.135809	0.79889	-0.19481	0.912928	0.986119	0.0144191	0.355545	0.92437	0.121385	0.276612	0.774195	-0.142737
k__Bacteria; p__Firmicutes; c__Bacilli; o__Lactobacillales; f__Leuconostocaceae; g__Leuconostoc; s__Leuconostoc_fallax	NA	NA	NA	NA	NA	NA	NA	NA	NA	NA	NA	NA	NA	NA	NA	NA	NA	NA	NA	NA	NA	NA	NA	NA	NA	NA	NA
k__Bacteria; p__Firmicutes; c__Bacilli; o__Lactobacillales; f__Leuconostocaceae; g__Leuconostoc; s__Leuconostoc_gasicomitatum	0.109049	0.770971	0.196073	0.977219	0.988368	-0.00376577	0.358786	0.776678	-0.120576	0.346178	0.991132	-0.12375	0.886311	0.968989	-0.0188528	0.158907	0.79889	-0.184184	0.316364	0.799044	-0.131556	0.797489	0.95424	-0.0338288	0.423478	0.774195	-0.105258
k__Bacteria; p__Firmicutes; c__Bacilli; o__Lactobacillales; f__Leuconostocaceae; g__Leuconostoc; s__Leuconostoc_gelidum	0.990302	0.997861	0.00150192	0.857502	0.988368	0.0236752	0.915189	0.962391	0.0140433	0.816182	0.997978	0.0306479	0.745693	0.968989	-0.0427501	0.281071	0.844179	-0.141433	0.100662	0.684132	-0.213975	0.419195	0.929231	-0.106228	0.496535	0.787803	-0.0894875
k__Bacteria; p__Firmicutes; c__Bacilli; o__Lactobacillales; f__Leuconostocaceae; g__Leuconostoc; s__Leuconostoc_inhae	NA	NA	NA	NA	NA	NA	NA	NA	NA	NA	NA	NA	NA	NA	NA	NA	NA	NA	NA	NA	NA	NA	NA	NA	NA	NA	NA
k__Bacteria; p__Firmicutes; c__Bacilli; o__Lactobacillales; f__Leuconostocaceae; g__Leuconostoc; s__Leuconostoc_kimchii	NA	NA	NA	NA	NA	NA	NA	NA	NA	NA	NA	NA	NA	NA	NA	NA	NA	NA	NA	NA	NA	NA	NA	NA	NA	NA	NA
k__Bacteria; p__Firmicutes; c__Bacilli; o__Lactobacillales; f__Leuconostocaceae; g__Leuconostoc; s__Leuconostoc_lactis	0.778882	0.9943	-0.0346819	0.608192	0.907343	0.0675285	0.205434	0.776678	0.165822	0.239907	0.991132	0.154053	0.632647	0.968989	0.0629735	0.828688	0.969451	-0.0285297	0.862274	0.976711	0.0228745	0.297527	0.914483	-0.136733	0.890498	0.956585	-0.0181541
k__Bacteria; p__Firmicutes; c__Bacilli; o__Lactobacillales; f__Leuconostocaceae; g__Leuconostoc; s__Leuconostoc_mesenteroides	0.233936	0.834311	-0.146277	0.886454	0.988368	0.0188288	0.902964	0.959167	0.0160767	1	1	0	0.157592	0.968989	-0.184757	0.797484	0.969451	0.0338297	0.475134	0.90305	0.0939688	0.375289	0.92437	0.116521	0.753747	0.92282	-0.0413514
k__Bacteria; p__Firmicutes; c__Bacilli; o__Lactobacillales; f__Leuconostocaceae; g__Leuconostoc; s__Leuconostoc_pseudomesenteroides	0.448507	0.944727	-0.0934407	0.70976	0.943775	-0.049051	0.825377	0.959167	0.0290897	0.50974	0.991132	-0.0867725	0.482138	0.968989	-0.0924908	0.12032	0.79889	-0.202723	0.550433	0.939298	-0.0786212	0.896498	0.975097	0.0171537	0.252285	0.774195	-0.150114
k__Bacteria; p__Firmicutes; c__Bacilli; o__Lactobacillales; f__Leuconostocaceae; g__Leuconostoc; s__Leuconostoc_unclassified	0.488622	0.989794	0.085408	0.539223	0.860412	-0.0808361	0.35122	0.776678	0.122472	0.0912846	0.991132	0.219953	0.612956	0.968989	-0.0666351	0.519428	0.940407	-0.0848033	0.733574	0.946958	-0.0448639	0.685076	0.95424	-0.0534426	0.583381	0.83127	-0.0722318
k__Bacteria; p__Firmicutes; c__Bacilli; o__Lactobacillales; f__Leuconostocaceae; g__Weissella; s__Weissella_cibaria	0.117788	0.770971	-0.191468	0.056583	0.570844	-0.247493	0.575962	0.918045	0.0736556	0.177364	0.991132	-0.176486	0.334266	0.968989	-0.126816	0.580332	0.966487	-0.072816	0.413708	0.878347	-0.107479	0.20893	0.914483	-0.164568	0.917429	0.964746	0.0136711
k__Bacteria; p__Firmicutes; c__Bacilli; o__Lactobacillales; f__Leuconostocaceae; g__Weissella; s__Weissella_confusa	0.812579	0.9943	-0.0292895	0.0792969	0.570844	-0.228341	0.468192	0.876665	-0.0954456	0.154707	0.991132	-0.186027	0.835308	0.968989	-0.0274111	0.364424	0.874141	-0.119178	0.273988	0.799044	-0.143511	0.522063	0.929231	-0.0842709	0.0833748	0.676872	-0.225382
k__Bacteria; p__Firmicutes; c__Bacilli; o__Lactobacillales; f__Leuconostocaceae; g__Weissella; s__Weissella_halotolerans	NA	NA	NA	NA	NA	NA	NA	NA	NA	NA	NA	NA	NA	NA	NA	NA	NA	NA	NA	NA	NA	NA	NA	NA	NA	NA	NA
k__Bacteria; p__Firmicutes; c__Bacilli; o__Lactobacillales; f__Leuconostocaceae; g__Weissella; s__Weissella_paramesenteroides	0.109049	0.770971	0.196073	0.977219	0.988368	-0.00376577	0.358786	0.776678	-0.120576	0.346178	0.991132	-0.12375	0.886311	0.968989	-0.0188528	0.158907	0.79889	-0.184184	0.316364	0.799044	-0.131556	0.797489	0.95424	-0.0338288	0.423478	0.774195	-0.105258
k__Bacteria; p__Firmicutes; c__Bacilli; o__Lactobacillales; f__Leuconostocaceae; g__Weissella; s__Weissella_unclassified	0.273671	0.834311	-0.134636	0.198539	0.663637	-0.16834	0.71669	0.959167	0.0478276	0.450312	0.991132	-0.0993042	0.700876	0.968989	-0.0506252	0.46385	0.929067	-0.096375	0.748701	0.946958	0.0422273	0.209136	0.914483	-0.164495	0.526946	0.80268	-0.0832879
k__Bacteria; p__Firmicutes; c__Bacilli; o__Lactobacillales; f__Streptococcaceae; g__Lactococcus; s__Lactococcus_garvieae	0.421251	0.938256	0.0991272	0.352754	0.792077	-0.122086	0.24605	0.776678	-0.152081	0.574138	0.991132	-0.0740069	0.534084	0.968989	-0.0818591	0.0356119	0.79889	-0.271867	0.992225	0.997838	-0.00128508	0.139782	0.815995	-0.192891	0.59689	0.83127	-0.0696603
k__Bacteria; p__Firmicutes; c__Bacilli; o__Lactobacillales; f__Streptococcaceae; g__Lactococcus; s__Lactococcus_lactis	0.774087	0.9943	-0.0354542	0.134877	0.570844	-0.195266	0.36037	0.776678	-0.120181	0.87868	0.997978	-0.0201276	0.787031	0.968989	-0.0356167	0.400659	0.919706	-0.110492	0.228181	0.799044	-0.157916	0.51973	0.929231	-0.0847422	0.118812	0.756594	-0.203534
k__Bacteria; p__Firmicutes; c__Bacilli; o__Lactobacillales; f__Streptococcaceae; g__Lactococcus; s__Lactococcus_raffinolactis	NA	NA	NA	NA	NA	NA	NA	NA	NA	NA	NA	NA	NA	NA	NA	NA	NA	NA	NA	NA	NA	NA	NA	NA	NA	NA	NA
k__Bacteria; p__Firmicutes; c__Bacilli; o__Lactobacillales; f__Streptococcaceae; g__Streptococcus; s__Streptococcus_agalactiae	0.162804	0.770971	0.171175	0.0995692	0.570844	0.214649	0.358786	0.776678	-0.120576	0.485359	0.991132	0.0918148	0.287727	0.968989	0.139511	0.886661	0.969451	-0.0187943	0.100217	0.684132	0.214249	0.113007	0.754064	0.206731	0.142248	0.756594	0.19172
k__Bacteria; p__Firmicutes; c__Bacilli; o__Lactobacillales; f__Streptococcaceae; g__Streptococcus; s__Streptococcus_anginosus	0.886426	0.99498	0.0176462	0.159085	0.595757	-0.184107	0.447657	0.867229	-0.0998843	0.567282	0.991132	-0.075332	0.732045	0.968989	-0.0451313	0.42628	0.929067	-0.104627	0.421729	0.878347	0.105653	0.417948	0.929231	0.106512	0.20814	0.771591	-0.16485
k__Bacteria; p__Firmicutes; c__Bacilli; o__Lactobacillales; f__Streptococcaceae; g__Streptococcus; s__Streptococcus_australis	0.0844383	0.770971	-0.210797	0.052828	0.570844	-0.251238	0.8901	0.959167	0.0182205	0.832059	0.997978	-0.0279599	0.730445	0.968989	-0.0454114	0.776782	0.969451	-0.0373751	0.549621	0.939298	-0.0787809	0.0179822	0.754064	-0.304559	0.0911105	0.707317	-0.220069
k__Bacteria; p__Firmicutes; c__Bacilli; o__Lactobacillales; f__Streptococcaceae; g__Streptococcus; s__Streptococcus_constellatus	0.649678	0.9943	0.0560773	0.583801	0.897932	0.0721514	0.735293	0.959167	0.0445634	0.859752	0.997978	0.0232976	0.517856	0.968989	-0.0851216	0.458253	0.929067	-0.0975803	0.231891	0.799044	0.156679	0.0537626	0.754064	0.250286	0.857277	0.945987	0.023713
k__Bacteria; p__Firmicutes; c__Bacilli; o__Lactobacillales; f__Streptococcaceae; g__Streptococcus; s__Streptococcus_cristatus	0.29573	0.837576	-0.128659	0.460247	0.820193	0.09715	0.368584	0.776678	0.118155	0.784339	0.997978	-0.036078	0.924101	0.982391	-0.012563	0.289141	0.844179	-0.139106	0.68379	0.946958	0.0536729	0.103236	0.754064	-0.21241	0.824134	0.943894	-0.0293001
k__Bacteria; p__Firmicutes; c__Bacilli; o__Lactobacillales; f__Streptococcaceae; g__Streptococcus; s__Streptococcus_dysgalactiae	NA	NA	NA	NA	NA	NA	NA	NA	NA	NA	NA	NA	NA	NA	NA	NA	NA	NA	NA	NA	NA	NA	NA	NA	NA	NA	NA
k__Bacteria; p__Firmicutes; c__Bacilli; o__Lactobacillales; f__Streptococcaceae; g__Streptococcus; s__Streptococcus_ferus	NA	NA	NA	NA	NA	NA	NA	NA	NA	NA	NA	NA	NA	NA	NA	NA	NA	NA	NA	NA	NA	NA	NA	NA	NA	NA	NA
k__Bacteria; p__Firmicutes; c__Bacilli; o__Lactobacillales; f__Streptococcaceae; g__Streptococcus; s__Streptococcus_gallolyticus	NA	NA	NA	NA	NA	NA	NA	NA	NA	NA	NA	NA	NA	NA	NA	NA	NA	NA	NA	NA	NA	NA	NA	NA	NA	NA	NA
k__Bacteria; p__Firmicutes; c__Bacilli; o__Lactobacillales; f__Streptococcaceae; g__Streptococcus; s__Streptococcus_gordonii	0.746526	0.9943	-0.0399211	0.157858	0.595757	-0.184641	0.382665	0.794381	-0.114744	0.199569	0.991132	-0.16796	0.855443	0.968989	0.024021	0.985673	0.996228	-0.00236815	0.0860138	0.684132	-0.223527	0.855102	0.967221	-0.0240783	0.204753	0.771591	-0.166068
k__Bacteria; p__Firmicutes; c__Bacilli; o__Lactobacillales; f__Streptococcaceae; g__Streptococcus; s__Streptococcus_infantarius	0.259137	0.834311	0.138752	0.688845	0.933212	-0.0527683	0.712166	0.959167	0.0486257	0.802565	0.997978	-0.0329633	0.926178	0.982391	-0.0122182	0.400962	0.919706	-0.110422	0.431911	0.878347	-0.103365	0.857346	0.967221	0.0237015	0.537501	0.80282	-0.0811783
k__Bacteria; p__Firmicutes; c__Bacilli; o__Lactobacillales; f__Streptococcaceae; g__Streptococcus; s__Streptococcus_infantis	0.650676	0.9943	-0.0559064	0.109223	0.570844	-0.208884	0.322254	0.776678	-0.129978	0.390014	0.991132	-0.112994	0.306168	0.968989	-0.134333	0.245449	0.844179	-0.152272	0.786533	0.959602	-0.035702	0.26798	0.914483	-0.145303	0.00943791	0.354013	-0.332513
k__Bacteria; p__Firmicutes; c__Bacilli; o__Lactobacillales; f__Streptococcaceae; g__Streptococcus; s__Streptococcus_intermedius	0.396979	0.935735	-0.104372	0.888704	0.988368	0.0184534	0.801692	0.959167	-0.0331119	0.95264	1	-0.00783213	0.622459	0.968989	0.064862	0.240403	0.844179	0.153892	0.613804	0.940332	0.0664763	0.215529	0.914483	0.162241	0.754349	0.92282	-0.041247
k__Bacteria; p__Firmicutes; c__Bacilli; o__Lactobacillales; f__Streptococcaceae; g__Streptococcus; s__Streptococcus_lutetiensis	0.208657	0.827718	0.154413	0.249315	0.709211	-0.151047	0.506845	0.89861	0.0873645	0.177364	0.991132	-0.176486	0.202523	0.968989	-0.166878	0.0838292	0.79889	-0.225059	0.210437	0.799044	-0.164032	0.210437	0.914483	-0.164032	0.491799	0.787803	-0.0904704
k__Bacteria; p__Firmicutes; c__Bacilli; o__Lactobacillales; f__Streptococcaceae; g__Streptococcus; s__Streptococcus_macedonicus	0.127239	0.770971	0.186774	0.931844	0.988368	0.0112781	0.188921	0.776678	-0.171959	0.847631	0.997978	-0.0253343	0.888113	0.968989	0.0185519	0.320846	0.844179	-0.130354	0.997838	0.997838	0.000357369	0.970276	0.98866	-0.00491383	0.906681	0.958449	-0.0154581
k__Bacteria; p__Firmicutes; c__Bacilli; o__Lactobacillales; f__Streptococcaceae; g__Streptococcus; s__Streptococcus_mitis_oralis_pneumoniae	0.271346	0.834311	-0.135285	0.254078	0.709211	-0.149554	0.187784	0.776678	-0.172395	0.745012	0.997978	-0.0428686	0.209756	0.968989	-0.164274	0.0629474	0.79889	-0.241581	0.376749	0.859201	-0.116168	0.412544	0.929231	-0.107745	0.0100086	0.354013	-0.330068
k__Bacteria; p__Firmicutes; c__Bacilli; o__Lactobacillales; f__Streptococcaceae; g__Streptococcus; s__Streptococcus_mutans	0.264453	0.834311	-0.137229	0.423843	0.820193	-0.105176	0.61812	0.922758	-0.0656701	0.791307	0.997978	0.034885	0.643638	0.968989	0.0609503	0.341622	0.844179	0.124915	0.0411491	0.487152	-0.264473	0.91293	0.976808	0.0144188	0.279625	0.774195	-0.141854
k__Bacteria; p__Firmicutes; c__Bacilli; o__Lactobacillales; f__Streptococcaceae; g__Streptococcus; s__Streptococcus_oligofermentans	0.171417	0.770971	-0.167786	0.747399	0.95557	0.0424535	0.832261	0.959167	0.0279257	0.802977	0.997978	-0.0328931	0.571016	0.968989	-0.0746095	0.41208	0.922155	-0.107852	0.984867	0.997838	0.00250127	0.692672	0.95424	-0.0520852	0.254942	0.774195	-0.149285
k__Bacteria; p__Firmicutes; c__Bacilli; o__Lactobacillales; f__Streptococcaceae; g__Streptococcus; s__Streptococcus_parasanguinis	0.591441	0.9943	-0.0662471	0.91886	0.988368	-0.0134333	0.179655	0.776678	0.175572	0.328955	0.991132	0.128205	0.386686	0.968989	0.113784	0.66516	0.966487	0.0570284	0.439643	0.878347	0.101647	0.973748	0.98866	0.0043396	0.637699	0.863599	-0.0620418
k__Bacteria; p__Firmicutes; c__Bacilli; o__Lactobacillales; f__Streptococcaceae; g__Streptococcus; s__Streptococcus_parauberis	0.109049	0.770971	0.196073	0.977219	0.988368	-0.00376577	0.358786	0.776678	-0.120576	0.346178	0.991132	-0.12375	0.886311	0.968989	-0.0188528	0.158907	0.79889	-0.184184	0.316364	0.799044	-0.131556	0.797489	0.95424	-0.0338288	0.423478	0.774195	-0.105258
k__Bacteria; p__Firmicutes; c__Bacilli; o__Lactobacillales; f__Streptococcaceae; g__Streptococcus; s__Streptococcus_pasteurianus	0.977834	0.99498	-0.00343295	0.29521	0.742068	-0.137384	0.861236	0.959167	-0.0230485	0.390744	0.991132	0.112821	0.709204	0.968989	0.0491493	0.851289	0.969451	-0.0247191	0.00820664	0.23168	-0.33826	0.546961	0.929231	-0.0793049	0.298681	0.774195	-0.13641
k__Bacteria; p__Firmicutes; c__Bacilli; o__Lactobacillales; f__Streptococcaceae; g__Streptococcus; s__Streptococcus_peroris	0.638269	0.9943	-0.0580384	0.179543	0.627545	-0.175617	0.188921	0.776678	-0.171959	0.435902	0.991132	0.102476	0.801934	0.968989	0.0330708	0.84209	0.969451	-0.0262674	0.609068	0.940332	0.0673641	0.767097	0.95424	0.0390426	0.524554	0.80268	-0.0837689
k__Bacteria; p__Firmicutes; c__Bacilli; o__Lactobacillales; f__Streptococcaceae; g__Streptococcus; s__Streptococcus_pseudopneumoniae	NA	NA	NA	NA	NA	NA	NA	NA	NA	NA	NA	NA	NA	NA	NA	NA	NA	NA	NA	NA	NA	NA	NA	NA	NA	NA	NA
k__Bacteria; p__Firmicutes; c__Bacilli; o__Lactobacillales; f__Streptococcaceae; g__Streptococcus; s__Streptococcus_salivarius	0.298131	0.837576	-0.128027	0.749888	0.95557	-0.042021	0.210587	0.776678	0.163979	0.397506	0.991132	0.111229	0.739154	0.968989	0.0438892	0.948337	0.987158	-0.00854464	0.470718	0.90305	-0.0949069	0.171137	0.889487	-0.179015	0.47328	0.781856	-0.0943621
k__Bacteria; p__Firmicutes; c__Bacilli; o__Lactobacillales; f__Streptococcaceae; g__Streptococcus; s__Streptococcus_sanguinis	0.709023	0.9943	-0.0460836	0.0117739	0.432104	-0.323202	0.600751	0.918045	0.0689299	0.705978	0.997978	-0.0497203	0.83963	0.968989	-0.0266821	0.439358	0.929067	-0.10171	0.0219883	0.372072	-0.295295	0.00466648	0.754064	-0.360465	0.00705071	0.354013	-0.344385
k__Bacteria; p__Firmicutes; c__Bacilli; o__Lactobacillales; f__Streptococcaceae; g__Streptococcus; s__Streptococcus_sobrinus	0.178875	0.770971	-0.164951	NA	NA	NA	NA	NA	NA	NA	NA	NA	NA	NA	NA	NA	NA	NA	NA	NA	NA	NA	NA	NA	NA	NA	NA
k__Bacteria; p__Firmicutes; c__Bacilli; o__Lactobacillales; f__Streptococcaceae; g__Streptococcus; s__Streptococcus_sp_BS35b	NA	NA	NA	NA	NA	NA	NA	NA	NA	NA	NA	NA	NA	NA	NA	NA	NA	NA	NA	NA	NA	NA	NA	NA	NA	NA	NA
k__Bacteria; p__Firmicutes; c__Bacilli; o__Lactobacillales; f__Streptococcaceae; g__Streptococcus; s__Streptococcus_thermophilus	0.726309	0.9943	-0.0432302	0.216415	0.666652	-0.161933	0.768242	0.959167	-0.0388452	0.639658	0.997978	0.0616813	0.840359	0.968989	0.0265592	0.457913	0.929067	-0.0976538	0.27109	0.799044	-0.144372	0.770704	0.95424	-0.0384209	0.234353	0.77311	-0.155866
k__Bacteria; p__Firmicutes; c__Bacilli; o__Lactobacillales; f__Streptococcaceae; g__Streptococcus; s__Streptococcus_tigurinus	0.832058	0.9943	-0.0261976	0.475174	0.820193	-0.0939604	0.464989	0.875133	-0.0961308	0.724364	0.997978	0.0464777	0.379611	0.968989	0.115478	0.624635	0.966487	0.0644575	0.836992	0.971246	0.027127	0.821222	0.963	-0.0297934	0.232367	0.77311	-0.156522
k__Bacteria; p__Firmicutes; c__Bacilli; o__Lactobacillales; f__Streptococcaceae; g__Streptococcus; s__Streptococcus_urinalis	0.109049	0.770971	0.196073	0.977219	0.988368	-0.00376577	0.358786	0.776678	-0.120576	0.346178	0.991132	-0.12375	0.886311	0.968989	-0.0188528	0.158907	0.79889	-0.184184	0.316364	0.799044	-0.131556	0.797489	0.95424	-0.0338288	0.423478	0.774195	-0.105258
k__Bacteria; p__Firmicutes; c__Bacilli; o__Lactobacillales; f__Streptococcaceae; g__Streptococcus; s__Streptococcus_vestibularis	0.925671	0.99498	-0.0115268	0.762894	0.95557	-0.0397683	0.758414	0.959167	-0.0405429	0.514525	0.991132	0.0857976	0.352822	0.968989	0.122069	0.649417	0.966487	0.0598922	0.629399	0.940332	-0.0635742	0.516062	0.929231	-0.0854854	0.581781	0.83127	-0.0725383
k__Bacteria; p__Firmicutes; c__Clostridia; o__Clostridiales; f__Clostridiaceae; g__Butyricicoccus; s__Butyricicoccus_pullicaecorum	NA	NA	NA	0.797119	0.975522	-0.0338919	0.358786	0.776678	-0.120576	0.346178	0.991132	-0.12375	0.509983	0.968989	-0.0867228	0.977261	0.996228	-0.00375886	0.710819	0.946958	0.0488638	0.100217	0.754064	0.214249	0.217239	0.77311	0.161647
k__Bacteria; p__Firmicutes; c__Clostridia; o__Clostridiales; f__Clostridiaceae; g__Clostridiaceae_noname; s__Clostridiaceae_bacterium_JC118	0.491816	0.989794	0.0847838	0.751637	0.95557	-0.0417174	0.79983	0.959167	-0.0334295	0.299829	0.991132	-0.136089	0.733047	0.968989	-0.044956	0.662453	0.966487	-0.057519	0.119534	0.703398	0.203145	0.341084	0.914483	0.125053	0.828106	0.943894	0.0286281
k__Bacteria; p__Firmicutes; c__Clostridia; o__Clostridiales; f__Clostridiaceae; g__Clostridium; s__Clostridium_asparagiforme	0.715971	0.9943	0.0449338	0.120758	0.570844	0.202489	0.00643618	0.776678	0.348008	0.589512	0.992436	0.0710614	0.294545	0.968989	0.137572	0.686289	0.966487	0.0532255	0.00536834	0.198679	0.355096	0.569906	0.93373	0.074824	0.185157	0.771591	0.173411
k__Bacteria; p__Firmicutes; c__Clostridia; o__Clostridiales; f__Clostridiaceae; g__Clostridium; s__Clostridium_bolteae	0.931015	0.99498	0.0106959	0.34549	0.792077	0.123926	0.271424	0.776678	0.144273	0.513174	0.991132	0.0860723	0.635033	0.968989	0.0625332	0.985768	0.996228	0.00235242	0.185179	0.787493	0.173402	0.955968	0.98866	0.0072811	0.528027	0.80268	0.0830709
k__Bacteria; p__Firmicutes; c__Clostridia; o__Clostridiales; f__Clostridiaceae; g__Clostridium; s__Clostridium_butyricum	NA	NA	NA	NA	NA	NA	NA	NA	NA	NA	NA	NA	NA	NA	NA	NA	NA	NA	NA	NA	NA	NA	NA	NA	NA	NA	NA
k__Bacteria; p__Firmicutes; c__Clostridia; o__Clostridiales; f__Clostridiaceae; g__Clostridium; s__Clostridium_celatum	NA	NA	NA	NA	NA	NA	NA	NA	NA	NA	NA	NA	NA	NA	NA	NA	NA	NA	NA	NA	NA	NA	NA	NA	NA	NA	NA
k__Bacteria; p__Firmicutes; c__Clostridia; o__Clostridiales; f__Clostridiaceae; g__Clostridium; s__Clostridium_citroniae	0.20902	0.827718	0.154291	0.28297	0.734829	0.140881	0.79027	0.959167	0.0350624	0.78352	0.997978	-0.0362184	0.910015	0.982281	-0.0149034	0.725944	0.969451	-0.0462005	0.0329633	0.468347	0.275747	0.526044	0.929231	0.0834692	0.438098	0.774195	0.101989
k__Bacteria; p__Firmicutes; c__Clostridia; o__Clostridiales; f__Clostridiaceae; g__Clostridium; s__Clostridium_clostridioforme	0.157995	0.770971	0.173125	0.039131	0.570844	0.267067	0.753848	0.959167	0.0413339	0.354678	0.991132	0.121602	0.231978	0.968989	0.15665	0.579117	0.966487	0.0730491	0.251505	0.799044	0.150358	0.154749	0.847657	0.186008	0.198057	0.771591	0.168519
k__Bacteria; p__Firmicutes; c__Clostridia; o__Clostridiales; f__Clostridiaceae; g__Clostridium; s__Clostridium_hathewayi	0.334605	0.85943	0.118796	0.47302	0.820193	0.0944173	0.785952	0.959167	0.0358015	0.74615	0.997978	-0.0426706	0.224128	0.968989	0.159283	0.469951	0.929067	0.0950702	0.0788271	0.684132	0.22869	0.817249	0.963	0.0304668	0.339547	0.774195	0.125449
k__Bacteria; p__Firmicutes; c__Clostridia; o__Clostridiales; f__Clostridiaceae; g__Clostridium; s__Clostridium_hylemonae	0.564801	0.9943	0.0710459	0.453301	0.820193	-0.0986534	0.833462	0.959167	0.0277229	0.486486	0.991132	0.0915789	0.222081	0.968989	0.15998	0.220903	0.844179	0.160383	0.181191	0.782318	-0.174964	0.259594	0.914483	-0.147849	0.238176	0.77311	-0.154615
k__Bacteria; p__Firmicutes; c__Clostridia; o__Clostridiales; f__Clostridiaceae; g__Clostridium; s__Clostridium_leptum	0.480944	0.981722	0.0869171	0.701094	0.935642	-0.0505864	0.967082	0.988416	-0.0054422	0.176681	0.991132	0.17676	0.72542	0.968989	0.0462923	0.528755	0.940407	-0.0829248	0.90409	0.986119	-0.0158893	0.656887	0.95424	-0.0585299	0.175757	0.771591	-0.177133
k__Bacteria; p__Firmicutes; c__Clostridia; o__Clostridiales; f__Clostridiaceae; g__Clostridium; s__Clostridium_methylpentosum	0.0909234	0.770971	0.206621	0.315453	0.756676	0.131802	0.148319	0.776678	0.188902	0.260073	0.991132	0.147702	0.709951	0.968989	0.0490172	0.710811	0.966487	-0.0488651	0.753776	0.946958	0.0413463	0.627646	0.95424	0.0638988	0.954535	0.979416	-0.00751844
k__Bacteria; p__Firmicutes; c__Clostridia; o__Clostridiales; f__Clostridiaceae; g__Clostridium; s__Clostridium_nexile	0.664672	0.9943	0.0535208	0.606609	0.907343	0.067826	0.537905	0.918045	-0.0810981	0.833871	0.997978	-0.0276537	0.713935	0.968989	-0.0483134	0.361004	0.871634	-0.120024	0.509519	0.92	-0.0868177	0.987313	0.992241	0.00209705	0.955398	0.979416	-0.00737553
k__Bacteria; p__Firmicutes; c__Clostridia; o__Clostridiales; f__Clostridiaceae; g__Clostridium; s__Clostridium_perfringens	0.939763	0.99498	0.00933682	0.78594	0.972003	0.0358036	0.578198	0.918045	0.0732257	0.966999	1	0.0054559	0.138894	0.968989	0.193317	0.118659	0.79889	0.203617	0.328952	0.810817	0.128206	0.426708	0.929231	0.10453	0.849506	0.945987	0.025019
k__Bacteria; p__Firmicutes; c__Clostridia; o__Clostridiales; f__Clostridiaceae; g__Clostridium; s__Clostridium_scindens	0.254623	0.834311	0.140062	0.121512	0.570844	-0.202088	0.72418	0.959167	-0.0465101	0.32517	0.991132	0.129204	0.712547	0.968989	-0.0485584	0.465405	0.929067	-0.0960416	0.513896	0.92	-0.0859254	0.262961	0.914483	0.14682	0.235104	0.77311	-0.155619
k__Bacteria; p__Firmicutes; c__Clostridia; o__Clostridiales; f__Clostridiaceae; g__Clostridium; s__Clostridium_sp_7_2_43FAA	NA	NA	NA	NA	NA	NA	NA	NA	NA	NA	NA	NA	NA	NA	NA	NA	NA	NA	NA	NA	NA	NA	NA	NA	NA	NA	NA
k__Bacteria; p__Firmicutes; c__Clostridia; o__Clostridiales; f__Clostridiaceae; g__Clostridium; s__Clostridium_sp_D5	NA	NA	NA	NA	NA	NA	NA	NA	NA	NA	NA	NA	NA	NA	NA	NA	NA	NA	NA	NA	NA	NA	NA	NA	NA	NA	NA
k__Bacteria; p__Firmicutes; c__Clostridia; o__Clostridiales; f__Clostridiaceae; g__Clostridium; s__Clostridium_sp_KLE_1755	NA	NA	NA	NA	NA	NA	NA	NA	NA	NA	NA	NA	NA	NA	NA	NA	NA	NA	NA	NA	NA	NA	NA	NA	NA	NA	NA
k__Bacteria; p__Firmicutes; c__Clostridia; o__Clostridiales; f__Clostridiaceae; g__Clostridium; s__Clostridium_sp_L2_50	NA	NA	NA	NA	NA	NA	NA	NA	NA	NA	NA	NA	NA	NA	NA	NA	NA	NA	NA	NA	NA	NA	NA	NA	NA	NA	NA
k__Bacteria; p__Firmicutes; c__Clostridia; o__Clostridiales; f__Clostridiaceae; g__Clostridium; s__Clostridium_symbiosum	0.769117	0.9943	0.0362563	0.215401	0.666652	0.162286	0.148226	0.776678	0.188944	0.343131	0.991132	0.124528	0.617093	0.968989	0.0658618	0.611306	0.966487	0.0669442	0.30441	0.799044	0.134818	0.972173	0.98866	-0.00460007	0.167202	0.771591	0.180648
k__Bacteria; p__Firmicutes; c__Clostridia; o__Clostridiales; f__Clostridiales_Family_XI_Incertae_Sedis; g__Anaerococcus; s__Anaerococcus_lactolyticus	NA	NA	NA	NA	NA	NA	NA	NA	NA	NA	NA	NA	NA	NA	NA	NA	NA	NA	NA	NA	NA	NA	NA	NA	NA	NA	NA
k__Bacteria; p__Firmicutes; c__Clostridia; o__Clostridiales; f__Clostridiales_Family_XI_Incertae_Sedis; g__Anaerococcus; s__Anaerococcus_obesiensis	0.820624	0.9943	-0.0280105	0.141541	0.570844	0.192054	0.358786	0.776678	-0.120576	0.448048	0.991132	0.0997987	0.547586	0.968989	0.0791817	0.345032	0.844179	0.124042	0.668738	0.940332	0.0563813	0.345046	0.914483	0.124039	0.359913	0.774195	0.120295
k__Bacteria; p__Firmicutes; c__Clostridia; o__Clostridiales; f__Clostridiales_Family_XI_Incertae_Sedis; g__Anaerococcus; s__Anaerococcus_prevotii	NA	NA	NA	NA	NA	NA	NA	NA	NA	NA	NA	NA	NA	NA	NA	NA	NA	NA	NA	NA	NA	NA	NA	NA	NA	NA	NA
k__Bacteria; p__Firmicutes; c__Clostridia; o__Clostridiales; f__Clostridiales_Family_XI_Incertae_Sedis; g__Anaerococcus; s__Anaerococcus_vaginalis	0.911749	0.99498	-0.0136937	0.106404	0.570844	0.210525	0.578198	0.918045	0.0732257	0.200767	0.991132	0.16752	0.220519	0.968989	0.160515	0.140147	0.79889	0.192717	0.372058	0.858776	0.117306	0.643741	0.95424	0.0609314	0.242841	0.77311	0.153107
k__Bacteria; p__Firmicutes; c__Clostridia; o__Clostridiales; f__Clostridiales_Family_XI_Incertae_Sedis; g__Clostridiales_Family_XI_Incertae_Sedis_noname; s__Clostridiales_bacterium_BV3C26	0.820624	0.9943	-0.0280105	0.141541	0.570844	0.192054	0.358786	0.776678	-0.120576	0.448048	0.991132	0.0997987	0.547586	0.968989	0.0791817	0.345032	0.844179	0.124042	0.668738	0.940332	0.0563813	0.345046	0.914483	0.124039	0.359913	0.774195	0.120295
k__Bacteria; p__Firmicutes; c__Clostridia; o__Clostridiales; f__Clostridiales_Family_XI_Incertae_Sedis; g__Finegoldia; s__Finegoldia_magna	0.326596	0.855057	-0.120766	0.74141	0.95557	0.0434959	0.0205817	0.776678	0.298371	0.534315	0.991132	0.081813	0.568955	0.968989	-0.075008	0.190832	0.819774	-0.17123	0.741543	0.946958	0.0434728	0.945332	0.98866	0.00904234	0.820516	0.943894	-0.029913
k__Bacteria; p__Firmicutes; c__Clostridia; o__Clostridiales; f__Clostridiales_Family_XI_Incertae_Sedis; g__Parvimonas; s__Parvimonas_micra	0.858427	0.99498	0.0220374	0.149761	0.578549	0.188245	0.638618	0.922758	0.0618726	0.202483	0.991132	0.166892	0.467039	0.968989	0.095692	0.40407	0.921079	0.109699	0.769228	0.947337	-0.0386753	0.846542	0.967221	0.0255177	0.809098	0.943894	-0.0318513
k__Bacteria; p__Firmicutes; c__Clostridia; o__Clostridiales; f__Clostridiales_Family_XI_Incertae_Sedis; g__Parvimonas; s__Parvimonas_unclassified	0.890616	0.99498	0.0169912	0.131033	0.570844	0.197174	0.748195	0.959167	0.0423151	0.804252	0.997978	0.0326758	0.688966	0.968989	-0.0527467	0.817198	0.969451	-0.0304755	0.636092	0.940332	-0.0623379	0.725604	0.95424	-0.0462601	0.237146	0.77311	-0.154951
k__Bacteria; p__Firmicutes; c__Clostridia; o__Clostridiales; f__Clostridiales_Family_XI_Incertae_Sedis; g__Peptoniphilus; s__Peptoniphilus_duerdenii	0.820624	0.9943	-0.0280105	0.141541	0.570844	0.192054	0.358786	0.776678	-0.120576	0.448048	0.991132	0.0997987	0.547586	0.968989	0.0791817	0.345032	0.844179	0.124042	0.668738	0.940332	0.0563813	0.345046	0.914483	0.124039	0.359913	0.774195	0.120295
k__Bacteria; p__Firmicutes; c__Clostridia; o__Clostridiales; f__Clostridiales_Family_XI_Incertae_Sedis; g__Peptoniphilus; s__Peptoniphilus_harei	NA	NA	NA	NA	NA	NA	NA	NA	NA	NA	NA	NA	NA	NA	NA	NA	NA	NA	NA	NA	NA	NA	NA	NA	NA	NA	NA
k__Bacteria; p__Firmicutes; c__Clostridia; o__Clostridiales; f__Clostridiales_Family_XI_Incertae_Sedis; g__Peptoniphilus; s__Peptoniphilus_lacrimalis	0.12347	0.770971	0.188613	0.803966	0.975522	0.0327246	0.985722	0.988416	-0.00235992	0.531627	0.991132	-0.0823499	0.322609	0.968989	-0.129884	0.474195	0.929067	-0.094168	0.843424	0.971246	-0.0260426	0.371623	0.92437	0.117412	0.496983	0.787803	0.0893947
k__Bacteria; p__Firmicutes; c__Clostridia; o__Clostridiales; f__Clostridiales_Family_XIII_Incertae_Sedis; g__Clostridiales_Family_XIII_Incertae_Sedis_noname; s__Eubacterium_infirmum	0.402805	0.938256	0.103096	0.344139	0.792077	-0.12427	0.358786	0.776678	-0.120576	0.346178	0.991132	-0.12375	0.157592	0.968989	-0.184757	0.28924	0.844179	-0.139078	0.548844	0.939298	-0.0789338	0.44037	0.929231	0.101486	0.710784	0.901507	-0.0488699
k__Bacteria; p__Firmicutes; c__Clostridia; o__Clostridiales; f__Clostridiales_noname; g__Clostridiales_noname; s__Clostridiales_bacterium_1_7_47FAA	0.939245	0.99498	0.0094173	0.355975	0.792077	0.121277	0.472958	0.881095	0.0944304	0.974906	1	0.00414823	0.324689	0.968989	0.129332	0.503301	0.940407	0.0880918	0.317876	0.799044	0.13115	0.665137	0.95424	0.0570326	0.464819	0.781856	0.0961672
k__Bacteria; p__Firmicutes; c__Clostridia; o__Clostridiales; f__Clostridiales_noname; g__Flavonifractor; s__Flavonifractor_plautii	0.463974	0.959794	0.0902992	0.538077	0.860412	-0.0810639	0.712143	0.959167	-0.0486298	0.881048	0.997978	-0.0197317	0.564024	0.968989	-0.0759645	0.500097	0.940407	-0.0887515	0.720806	0.946958	0.047103	0.475898	0.929231	0.093807	0.683683	0.895473	-0.0536921
k__Bacteria; p__Firmicutes; c__Clostridia; o__Clostridiales; f__Clostridiales_noname; g__Pseudoflavonifractor; s__Pseudoflavonifractor_capillosus	0.677288	0.9943	0.051387	0.0568819	0.570844	0.247203	0.872034	0.959167	-0.0212392	0.42113	0.991132	0.105789	0.0624152	0.968989	0.242057	0.0886247	0.79889	0.221736	0.974188	0.997838	0.00426687	0.149248	0.830532	0.188478	0.671713	0.889959	0.0558441
k__Bacteria; p__Firmicutes; c__Clostridia; o__Clostridiales; f__Eubacteriaceae; g__Anaerofustis; s__Anaerofustis_stercorihominis	0.499896	0.989794	-0.0832145	0.802587	0.975522	0.0329596	0.273819	0.776678	0.143562	0.809399	0.997978	0.0318001	0.205728	0.968989	0.165716	0.0912922	0.79889	0.219948	0.573066	0.939298	-0.0742136	0.779279	0.95424	-0.0369462	0.0739976	0.676872	0.232372
k__Bacteria; p__Firmicutes; c__Clostridia; o__Clostridiales; f__Eubacteriaceae; g__Eubacterium; s__Eubacterium_brachy	0.63131	0.9943	0.0592416	0.687615	0.933212	-0.0529882	0.120836	0.776678	-0.202447	0.971885	1	-0.00464783	0.991578	0.993493	-0.00139197	0.920851	0.987158	0.0131026	0.618255	0.940332	-0.0656448	0.408098	0.929231	0.108768	0.18589	0.771591	-0.173127
k__Bacteria; p__Firmicutes; c__Clostridia; o__Clostridiales; f__Eubacteriaceae; g__Eubacterium; s__Eubacterium_eligens	0.614738	0.9943	-0.0621295	0.955039	0.988368	0.00743498	0.820867	0.959167	0.0298534	0.798691	0.997978	0.0336237	0.853696	0.968989	-0.0243145	0.944279	0.987158	0.00921682	0.16741	0.758512	-0.180561	0.622067	0.95424	-0.0649349	0.866081	0.945987	0.0222362
k__Bacteria; p__Firmicutes; c__Clostridia; o__Clostridiales; f__Eubacteriaceae; g__Eubacterium; s__Eubacterium_hallii	0.814578	0.9943	0.0289713	0.0772198	0.570844	-0.229895	0.271625	0.776678	0.144213	0.941209	1	-0.00972551	0.790618	0.968989	-0.0350028	0.476779	0.929067	-0.0936207	0.234166	0.799044	-0.155928	0.214204	0.914483	-0.162705	0.0989787	0.707317	-0.215015
k__Bacteria; p__Firmicutes; c__Clostridia; o__Clostridiales; f__Eubacteriaceae; g__Eubacterium; s__Eubacterium_limosum	0.7781	0.9943	0.0348078	0.648762	0.933212	-0.0600119	0.75587	0.959167	0.0409834	0.700354	0.997978	0.0507179	0.718598	0.968989	-0.0474915	0.498304	0.940407	-0.0891217	0.602717	0.940332	-0.068559	0.450005	0.929231	-0.0993712	0.0764696	0.676872	-0.230464
k__Bacteria; p__Firmicutes; c__Clostridia; o__Clostridiales; f__Eubacteriaceae; g__Eubacterium; s__Eubacterium_ramulus	0.453614	0.95043	-0.0923968	0.00218305	0.166165	-0.38811	0.581724	0.918045	0.0725492	0.811918	0.997978	-0.031372	0.749909	0.968989	-0.0420174	0.785118	0.969451	-0.0359444	0.14696	0.738827	-0.189525	0.0943196	0.754064	-0.217968	0.0385387	0.591356	-0.267849
k__Bacteria; p__Firmicutes; c__Clostridia; o__Clostridiales; f__Eubacteriaceae; g__Eubacterium; s__Eubacterium_rectale	0.775128	0.9943	-0.0352865	0.057265	0.570844	-0.246834	0.688997	0.957811	0.0527411	0.285351	0.991132	0.140193	0.851726	0.968989	0.0246457	0.726877	0.969451	0.0460367	0.000280822	0.0257655	-0.452773	0.0484579	0.754064	-0.25588	0.27643	0.774195	-0.142791
k__Bacteria; p__Firmicutes; c__Clostridia; o__Clostridiales; f__Eubacteriaceae; g__Eubacterium; s__Eubacterium_saphenum	0.091439	0.770971	-0.206299	0.939402	0.988368	0.010025	0.565336	0.918045	0.0757095	0.114664	0.991132	0.205806	0.709407	0.968989	-0.0491133	0.797558	0.969451	-0.033817	0.735699	0.946958	-0.0444925	0.141663	0.815995	0.191997	0.88363	0.956399	0.0193003
k__Bacteria; p__Firmicutes; c__Clostridia; o__Clostridiales; f__Eubacteriaceae; g__Eubacterium; s__Eubacterium_siraeum	0.290969	0.837576	-0.129924	0.257356	0.709211	-0.148538	0.554188	0.918045	0.0778841	0.334761	0.991132	0.126688	0.289337	0.968989	0.13905	0.280653	0.844179	0.141554	0.558547	0.939298	-0.0770315	0.447315	0.929231	-0.0999592	0.502305	0.787803	-0.0882966
k__Bacteria; p__Firmicutes; c__Clostridia; o__Clostridiales; f__Eubacteriaceae; g__Eubacterium; s__Eubacterium_sp_3_1_31	0.965647	0.99498	-0.00532149	0.912768	0.988368	-0.0144457	0.828946	0.959167	0.0284859	0.721132	0.997978	0.0470456	0.94879	0.983395	0.00846962	0.609738	0.966487	0.0672383	0.260721	0.799044	-0.147504	0.48822	0.929231	-0.0912164	0.49651	0.787803	-0.0894927
k__Bacteria; p__Firmicutes; c__Clostridia; o__Clostridiales; f__Eubacteriaceae; g__Eubacterium; s__Eubacterium_ventriosum	0.646284	0.9943	-0.0566593	0.0590964	0.570844	-0.245097	0.81473	0.959167	-0.0308944	0.269031	0.991132	-0.144988	0.869104	0.968989	0.0217297	0.608341	0.966487	0.0675006	0.575864	0.939298	-0.0736744	0.289618	0.914483	-0.13897	0.493269	0.787803	-0.0901647
k__Bacteria; p__Firmicutes; c__Clostridia; o__Clostridiales; f__Eubacteriaceae; g__Pseudoramibacter; s__Pseudoramibacter_alactolyticus	0.0879236	0.770971	0.208522	NA	NA	NA	NA	NA	NA	NA	NA	NA	NA	NA	NA	NA	NA	NA	NA	NA	NA	NA	NA	NA	NA	NA	NA
k__Bacteria; p__Firmicutes; c__Clostridia; o__Clostridiales; f__Lachnospiraceae; g__Anaerostipes; s__Anaerostipes_caccae	0.685069	0.9943	-0.0500784	0.717491	0.948132	-0.0476865	0.851868	0.959167	-0.0246218	0.685955	0.997978	-0.0532852	0.747937	0.968989	-0.0423599	0.700932	0.966487	-0.0506153	0.746161	0.946958	-0.0426687	0.232281	0.914483	0.15655	0.427925	0.774195	-0.104257
k__Bacteria; p__Firmicutes; c__Clostridia; o__Clostridiales; f__Lachnospiraceae; g__Anaerostipes; s__Anaerostipes_hadrus	0.656163	0.9943	-0.0549687	0.111869	0.570844	-0.207373	0.994596	0.994596	-0.000893123	0.256743	0.991132	0.148727	0.428647	0.968989	0.104095	0.224923	0.844179	0.159013	7.1685e-05	0.019734	-0.489655	0.0860019	0.754064	-0.223536	0.154095	0.771591	-0.186298
k__Bacteria; p__Firmicutes; c__Clostridia; o__Clostridiales; f__Lachnospiraceae; g__Anaerostipes; s__Anaerostipes_sp_3_2_56FAA	NA	NA	NA	NA	NA	NA	NA	NA	NA	NA	NA	NA	NA	NA	NA	NA	NA	NA	NA	NA	NA	NA	NA	NA	NA	NA	NA
k__Bacteria; p__Firmicutes; c__Clostridia; o__Clostridiales; f__Lachnospiraceae; g__Anaerostipes; s__Anaerostipes_unclassified	0.776267	0.9943	0.0351029	0.679591	0.933212	-0.0544262	0.369043	0.776678	0.118043	0.552951	0.991132	-0.0781266	0.644486	0.968989	-0.0607949	0.797705	0.969451	-0.033792	0.753084	0.946958	0.0414663	0.912122	0.976808	-0.0145531	0.458635	0.781856	-0.0974978
k__Bacteria; p__Firmicutes; c__Clostridia; o__Clostridiales; f__Lachnospiraceae; g__Blautia; s__Blautia_hansenii	NA	NA	NA	NA	NA	NA	NA	NA	NA	NA	NA	NA	NA	NA	NA	NA	NA	NA	NA	NA	NA	NA	NA	NA	NA	NA	NA
k__Bacteria; p__Firmicutes; c__Clostridia; o__Clostridiales; f__Lachnospiraceae; g__Blautia; s__Blautia_hydrogenotrophica	0.711079	0.9943	-0.045743	0.0177646	0.555507	-0.305111	0.94463	0.984884	0.00915865	0.266711	0.991132	-0.145685	0.133957	0.968989	-0.195719	0.0707022	0.79889	-0.234996	0.635489	0.940332	0.062449	0.0434812	0.754064	-0.261604	0.624002	0.857711	-0.064575
k__Bacteria; p__Firmicutes; c__Clostridia; o__Clostridiales; f__Lachnospiraceae; g__Blautia; s__Blautia_producta	0.10464	0.770971	0.198506	0.306697	0.755421	-0.134187	0.617574	0.922758	-0.0657719	0.779153	0.997978	0.0369678	0.755852	0.968989	-0.0409865	0.250897	0.844179	-0.150549	0.958955	0.997838	0.00678684	0.95854	0.98866	0.0068554	0.654128	0.87743	-0.0590324
k__Bacteria; p__Firmicutes; c__Clostridia; o__Clostridiales; f__Lachnospiraceae; g__Blautia; s__Ruminococcus_gnavus	0.614625	0.9943	0.0621494	0.979177	0.988368	0.00344193	0.393944	0.794381	-0.112066	0.640428	0.997978	-0.0615398	0.774405	0.968989	-0.0377838	0.762902	0.969451	0.0397669	0.468592	0.90305	0.09536	0.306471	0.914483	0.13425	0.997812	0.997812	0.000361679
k__Bacteria; p__Firmicutes; c__Clostridia; o__Clostridiales; f__Lachnospiraceae; g__Blautia; s__Ruminococcus_obeum	0.761551	0.9943	0.0374801	0.0218306	0.565436	-0.295631	0.84136	0.959167	0.0263904	0.781113	0.997978	-0.0366313	0.842445	0.968989	0.0262077	0.919081	0.987158	-0.0133967	0.582931	0.940332	-0.072318	0.538451	0.929231	-0.0809894	0.23295	0.77311	-0.156329
k__Bacteria; p__Firmicutes; c__Clostridia; o__Clostridiales; f__Lachnospiraceae; g__Blautia; s__Ruminococcus_torques	0.768396	0.9943	-0.0363727	0.217979	0.666652	-0.16139	0.643459	0.922758	0.0609832	0.570349	0.991132	-0.0747384	0.626275	0.968989	-0.064153	0.979654	0.996228	0.00336307	0.499461	0.916511	-0.0888827	0.135995	0.815995	-0.194719	0.0848395	0.676872	-0.224347
k__Bacteria; p__Firmicutes; c__Clostridia; o__Clostridiales; f__Lachnospiraceae; g__Coprococcus; s__Coprococcus_catus	0.930022	0.99498	-0.0108503	0.00236868	0.166165	-0.385251	0.432643	0.84909	-0.103201	0.571024	0.991132	-0.0746078	0.796615	0.968989	-0.033978	0.928616	0.987158	-0.0118136	0.164877	0.758512	-0.181626	0.683464	0.95424	-0.0537314	0.082421	0.676872	-0.226064
k__Bacteria; p__Firmicutes; c__Clostridia; o__Clostridiales; f__Lachnospiraceae; g__Coprococcus; s__Coprococcus_comes	0.93424	0.99498	-0.0101948	0.0230506	0.565436	-0.293081	0.735315	0.959167	0.0445595	0.713165	0.997978	-0.0484494	0.814018	0.968989	0.0310152	0.571982	0.966487	0.0744228	0.000107542	0.019734	-0.47913	0.02863	0.754064	-0.282696	0.022439	0.484419	-0.294345
k__Bacteria; p__Firmicutes; c__Clostridia; o__Clostridiales; f__Lachnospiraceae; g__Coprococcus; s__Coprococcus_eutactus	0.254655	0.834311	0.140052	0.931728	0.988368	-0.0112973	0.501696	0.89861	0.0884221	0.855856	0.997978	0.0239517	0.438928	0.968989	0.101805	0.407061	0.922155	0.109007	0.345046	0.822284	-0.124039	0.176928	0.889487	-0.176661	0.276227	0.774195	-0.14285
k__Bacteria; p__Firmicutes; c__Clostridia; o__Clostridiales; f__Lachnospiraceae; g__Coprococcus; s__Coprococcus_sp_ART55_1	0.0911221	0.770971	-0.206497	0.0386474	0.570844	-0.267705	0.961376	0.988416	0.00638621	0.991992	1	0.00132352	0.961482	0.985654	-0.00636855	0.936188	0.987158	0.0105578	0.0968935	0.684132	-0.216323	0.93548	0.98866	-0.0106751	0.134802	0.756594	-0.195303
k__Bacteria; p__Firmicutes; c__Clostridia; o__Clostridiales; f__Lachnospiraceae; g__Dorea; s__Dorea_formicigenerans	0.968106	0.99498	-0.00494035	0.00067986	0.166165	-0.426449	0.643668	0.922758	-0.0609448	0.296513	0.991132	-0.137018	0.401855	0.968989	-0.110214	0.568128	0.966487	-0.0751682	0.307852	0.799044	-0.13387	0.677155	0.95424	-0.0548639	0.130164	0.756594	-0.197611
k__Bacteria; p__Firmicutes; c__Clostridia; o__Clostridiales; f__Lachnospiraceae; g__Dorea; s__Dorea_longicatena	0.874299	0.99498	-0.0195451	0.002481	0.166165	-0.383617	0.549605	0.918045	0.0787841	0.753122	0.997978	-0.0414598	0.674657	0.968989	0.0553135	0.599617	0.966487	0.0691443	0.00456361	0.198679	-0.36131	0.0956011	0.754064	-0.217145	0.12323	0.756594	-0.201179
k__Bacteria; p__Firmicutes; c__Clostridia; o__Clostridiales; f__Lachnospiraceae; g__Dorea; s__Dorea_unclassified	0.684581	0.9943	0.0501603	0.783331	0.972003	0.0362507	0.965866	0.988416	-0.00564331	0.918804	1	0.0134427	0.410097	0.968989	-0.108307	0.376059	0.884702	-0.116335	0.913571	0.986119	-0.0143123	0.618667	0.95424	-0.065568	0.831016	0.94422	-0.028136
k__Bacteria; p__Firmicutes; c__Clostridia; o__Clostridiales; f__Lachnospiraceae; g__Johnsonella; s__Johnsonella_ignava	NA	NA	NA	NA	NA	NA	NA	NA	NA	NA	NA	NA	NA	NA	NA	NA	NA	NA	NA	NA	NA	NA	NA	NA	NA	NA	NA
k__Bacteria; p__Firmicutes; c__Clostridia; o__Clostridiales; f__Lachnospiraceae; g__Lachnoanaerobaculum; s__Lachnoanaerobaculum_saburreum	0.178875	0.770971	-0.164951	NA	NA	NA	NA	NA	NA	NA	NA	NA	NA	NA	NA	NA	NA	NA	NA	NA	NA	NA	NA	NA	NA	NA	NA
k__Bacteria; p__Firmicutes; c__Clostridia; o__Clostridiales; f__Lachnospiraceae; g__Lachnospiraceae_noname; s__Lachnospiraceae_bacterium_1_1_57FAA	0.978509	0.99498	-0.00332841	0.559763	0.87792	-0.076794	0.344046	0.776678	0.124294	0.188939	0.991132	0.171952	0.181225	0.968989	0.174951	0.198874	0.819774	0.168216	0.333111	0.812941	-0.127117	0.0439432	0.754064	-0.26105	0.740981	0.922008	-0.0435707
k__Bacteria; p__Firmicutes; c__Clostridia; o__Clostridiales; f__Lachnospiraceae; g__Lachnospiraceae_noname; s__Lachnospiraceae_bacterium_1_4_56FAA	0.0653181	0.770971	-0.224803	0.672179	0.933212	-0.0557601	0.883022	0.959167	0.019402	0.631888	0.997978	0.0631138	0.785882	0.968989	-0.0358135	0.508179	0.940407	-0.0870916	0.232976	0.799044	-0.15632	0.300841	0.914483	-0.135807	0.987588	0.992197	0.00205154
k__Bacteria; p__Firmicutes; c__Clostridia; o__Clostridiales; f__Lachnospiraceae; g__Lachnospiraceae_noname; s__Lachnospiraceae_bacterium_2_1_46FAA	0.637791	0.9943	-0.0581209	0.416306	0.820193	0.106885	0.283694	0.776678	-0.140672	0.67761	0.997978	0.0547821	0.704528	0.968989	-0.0499772	0.284936	0.844179	-0.140313	0.930982	0.993228	-0.0114211	0.67182	0.95424	0.0558248	0.374631	0.774195	-0.116681
k__Bacteria; p__Firmicutes; c__Clostridia; o__Clostridiales; f__Lachnospiraceae; g__Lachnospiraceae_noname; s__Lachnospiraceae_bacterium_2_1_58FAA	0.696325	0.9943	0.0481952	0.164269	0.602866	-0.181883	0.642285	0.922758	-0.0611986	0.664476	0.997978	-0.0571523	0.375504	0.968989	-0.116469	0.988104	0.996228	-0.00196624	0.753608	0.946958	0.0413754	0.851031	0.967221	0.0247625	0.529288	0.80268	-0.0828181
k__Bacteria; p__Firmicutes; c__Clostridia; o__Clostridiales; f__Lachnospiraceae; g__Lachnospiraceae_noname; s__Lachnospiraceae_bacterium_3_1_46FAA	0.611249	0.9943	0.0627418	0.665784	0.933212	-0.0569154	0.0981131	0.776678	0.215556	0.427352	0.991132	0.104386	0.86708	0.968989	0.0220688	0.887563	0.969451	0.0186438	0.0663904	0.684132	-0.238582	0.781564	0.95424	0.0365538	0.272964	0.774195	-0.143815
k__Bacteria; p__Firmicutes; c__Clostridia; o__Clostridiales; f__Lachnospiraceae; g__Lachnospiraceae_noname; s__Lachnospiraceae_bacterium_3_1_57FAA_CT1	0.820333	0.9943	0.0280567	0.515722	0.844956	0.0855543	0.261137	0.776678	0.147377	0.827182	0.997978	-0.0287842	0.462407	0.968989	0.0966851	0.320712	0.844179	0.13039	0.794658	0.959602	0.0343122	0.440088	0.929231	-0.101549	0.589914	0.83127	-0.0709849
k__Bacteria; p__Firmicutes; c__Clostridia; o__Clostridiales; f__Lachnospiraceae; g__Lachnospiraceae_noname; s__Lachnospiraceae_bacterium_4_1_37FAA	0.605839	0.9943	0.0636941	0.211821	0.666652	-0.163543	0.851812	0.959167	-0.0246312	0.303083	0.991132	0.135185	0.975825	0.99302	-0.00399627	0.828688	0.969451	0.0285297	0.110894	0.703398	-0.207927	0.342392	0.914483	-0.124717	0.288166	0.774195	-0.139385
k__Bacteria; p__Firmicutes; c__Clostridia; o__Clostridiales; f__Lachnospiraceae; g__Lachnospiraceae_noname; s__Lachnospiraceae_bacterium_5_1_57FAA	0.227778	0.834311	0.1482	0.0429017	0.570844	-0.262305	0.983947	0.988416	-0.00265344	0.356902	0.991132	0.121045	0.485485	0.968989	-0.0917884	0.189825	0.819774	-0.171613	0.911363	0.986119	-0.0146793	0.55212	0.929231	0.0782897	0.327854	0.774195	-0.128495
k__Bacteria; p__Firmicutes; c__Clostridia; o__Clostridiales; f__Lachnospiraceae; g__Lachnospiraceae_noname; s__Lachnospiraceae_bacterium_5_1_63FAA	0.826398	0.9943	-0.0270944	0.0308952	0.565436	-0.278962	0.94288	0.984884	-0.00944855	0.563536	0.991132	0.0760593	0.561642	0.968989	0.0764279	0.529953	0.940407	0.0826849	0.000218216	0.0257655	-0.459909	0.00832838	0.754064	-0.337659	0.149315	0.771591	-0.188447
k__Bacteria; p__Firmicutes; c__Clostridia; o__Clostridiales; f__Lachnospiraceae; g__Lachnospiraceae_noname; s__Lachnospiraceae_bacterium_6_1_63FAA	0.72992	0.9943	0.0426369	0.593873	0.897932	-0.0702322	0.345275	0.776678	-0.12398	0.77309	0.997978	0.03801	0.78913	0.968989	-0.0352574	0.26284	0.844179	-0.146857	0.163313	0.758512	-0.182289	0.324158	0.914483	-0.129472	0.246468	0.77311	-0.151948
k__Bacteria; p__Firmicutes; c__Clostridia; o__Clostridiales; f__Lachnospiraceae; g__Lachnospiraceae_noname; s__Lachnospiraceae_bacterium_7_1_58FAA	0.959763	0.99498	0.00623367	0.667446	0.933212	-0.0566148	0.533587	0.918045	0.0819582	0.691075	0.997978	-0.0523701	0.850512	0.968989	0.0248498	0.538144	0.944971	0.0810504	0.646402	0.940332	-0.0604437	0.926748	0.98866	0.0121237	0.741123	0.922008	-0.0435459
k__Bacteria; p__Firmicutes; c__Clostridia; o__Clostridiales; f__Lachnospiraceae; g__Lachnospiraceae_noname; s__Lachnospiraceae_bacterium_8_1_57FAA	0.996728	0.998779	-0.000506657	0.557216	0.877675	-0.0772914	0.804787	0.959167	0.0325847	0.872857	0.997978	0.0211015	0.771373	0.968989	0.0383057	0.533646	0.941578	0.0819464	0.393349	0.873245	-0.112206	0.73923	0.95424	0.043876	0.637475	0.863599	0.0620831
k__Bacteria; p__Firmicutes; c__Clostridia; o__Clostridiales; f__Lachnospiraceae; g__Lachnospiraceae_noname; s__Lachnospiraceae_bacterium_9_1_43BFAA	0.662663	0.9943	-0.0538619	0.594544	0.897932	-0.070105	0.37035	0.776678	0.117723	0.255686	0.991132	0.149055	0.802366	0.968989	-0.0329972	0.596537	0.966487	-0.0697271	0.0260449	0.415586	-0.287274	0.0409329	0.754064	-0.264746	0.420105	0.774195	-0.106021
k__Bacteria; p__Firmicutes; c__Clostridia; o__Clostridiales; f__Lachnospiraceae; g__Lachnospiraceae_noname; s__Lachnospiraceae_bacterium_ICM7	0.833605	0.9943	0.0259528	0.977219	0.988368	-0.00376577	0.358786	0.776678	-0.120576	0.346178	0.991132	-0.12375	0.886311	0.968989	-0.0188528	0.158907	0.79889	-0.184184	0.316364	0.799044	-0.131556	0.797489	0.95424	-0.0338288	0.423478	0.774195	-0.105258
k__Bacteria; p__Firmicutes; c__Clostridia; o__Clostridiales; f__Lachnospiraceae; g__Lachnospiraceae_noname; s__Lachnospiraceae_bacterium_oral_taxon_082	0.178875	0.770971	-0.164951	NA	NA	NA	NA	NA	NA	NA	NA	NA	NA	NA	NA	NA	NA	NA	NA	NA	NA	NA	NA	NA	NA	NA	NA
k__Bacteria; p__Firmicutes; c__Clostridia; o__Clostridiales; f__Lachnospiraceae; g__Lachnospiraceae_noname; s__Lachnospiraceae_oral_taxon_107	0.178875	0.770971	-0.164951	NA	NA	NA	NA	NA	NA	NA	NA	NA	NA	NA	NA	NA	NA	NA	NA	NA	NA	NA	NA	NA	NA	NA	NA
k__Bacteria; p__Firmicutes; c__Clostridia; o__Clostridiales; f__Lachnospiraceae; g__Oribacterium; s__Oribacterium_sinus	0.881681	0.99498	0.0183887	0.977219	0.988368	-0.00376577	0.358786	0.776678	-0.120576	0.346178	0.991132	-0.12375	0.886311	0.968989	-0.0188528	0.158907	0.79889	-0.184184	0.316364	0.799044	-0.131556	0.797489	0.95424	-0.0338288	0.423478	0.774195	-0.105258
k__Bacteria; p__Firmicutes; c__Clostridia; o__Clostridiales; f__Lachnospiraceae; g__Oribacterium; s__Oribacterium_sp_ACB8	0.178875	0.770971	-0.164951	NA	NA	NA	NA	NA	NA	NA	NA	NA	NA	NA	NA	NA	NA	NA	NA	NA	NA	NA	NA	NA	NA	NA	NA
k__Bacteria; p__Firmicutes; c__Clostridia; o__Clostridiales; f__Lachnospiraceae; g__Oribacterium; s__Oribacterium_sp_oral_taxon_078	0.833605	0.9943	0.0259528	0.977219	0.988368	-0.00376577	0.358786	0.776678	-0.120576	0.346178	0.991132	-0.12375	0.886311	0.968989	-0.0188528	0.158907	0.79889	-0.184184	0.316364	0.799044	-0.131556	0.797489	0.95424	-0.0338288	0.423478	0.774195	-0.105258
k__Bacteria; p__Firmicutes; c__Clostridia; o__Clostridiales; f__Lachnospiraceae; g__Roseburia; s__Roseburia_hominis	0.837915	0.99498	0.0252712	0.544498	0.865069	-0.0797911	0.955236	0.988416	-0.00740231	0.504783	0.991132	0.0877874	0.536759	0.968989	0.081326	0.314564	0.844179	0.132042	0.121864	0.703398	-0.2019	0.885871	0.975097	-0.0189262	0.71128	0.901507	-0.0487823
k__Bacteria; p__Firmicutes; c__Clostridia; o__Clostridiales; f__Lachnospiraceae; g__Roseburia; s__Roseburia_intestinalis	0.934652	0.99498	0.0101308	0.577896	0.894885	-0.0732837	0.517391	0.908529	-0.0852158	0.576115	0.991132	0.0736262	0.71922	0.968989	0.047382	0.922657	0.987158	0.0128028	0.139669	0.729199	-0.192945	0.511337	0.929231	-0.0864466	0.77723	0.938879	-0.037298
k__Bacteria; p__Firmicutes; c__Clostridia; o__Clostridiales; f__Lachnospiraceae; g__Roseburia; s__Roseburia_inulinivorans	0.29003	0.837576	-0.130175	0.479626	0.820193	-0.0930196	0.541608	0.918045	0.0803631	0.454641	0.991132	-0.0983625	0.506086	0.968989	-0.0875202	0.567588	0.966487	-0.0752727	0.279872	0.799044	-0.141782	0.134256	0.815995	-0.195572	0.802931	0.943894	-0.0329009
k__Bacteria; p__Firmicutes; c__Clostridia; o__Clostridiales; f__Lachnospiraceae; g__Roseburia; s__Roseburia_unclassified	0.27254	0.834311	0.134951	0.203315	0.666652	-0.166589	0.589464	0.918045	-0.0710705	0.521284	0.991132	-0.0844282	0.53926	0.968989	0.0808288	0.750759	0.969451	0.0418697	0.583295	0.940332	0.0722483	0.365249	0.92437	0.118974	0.19102	0.771591	-0.171158
k__Bacteria; p__Firmicutes; c__Clostridia; o__Clostridiales; f__Lachnospiraceae; g__Shuttleworthia; s__Shuttleworthia_satelles	0.275992	0.834311	0.133993	0.977219	0.988368	-0.00376577	0.358786	0.776678	-0.120576	0.346178	0.991132	-0.12375	0.886311	0.968989	-0.0188528	0.158907	0.79889	-0.184184	0.316364	0.799044	-0.131556	0.797489	0.95424	-0.0338288	0.423478	0.774195	-0.105258
k__Bacteria; p__Firmicutes; c__Clostridia; o__Clostridiales; f__Lachnospiraceae; g__Stomatobaculum; s__Stomatobaculum_longum	0.646723	0.9943	-0.056584	0.659792	0.933212	0.0580019	0.188921	0.776678	-0.171959	0.177364	0.991132	-0.176486	0.274983	0.968989	-0.143217	0.0251064	0.79889	-0.28903	0.736722	0.946958	0.0443138	0.544089	0.929231	-0.079872	0.660593	0.878398	-0.0578564
k__Bacteria; p__Firmicutes; c__Clostridia; o__Clostridiales; f__Oscillospiraceae; g__Oscillibacter; s__Oscillibacter_unclassified	0.380744	0.90828	0.107985	0.831487	0.984373	0.0280565	0.129407	0.776678	0.197993	0.436108	0.991132	0.10243	0.56824	0.968989	0.0751466	0.313215	0.844179	0.132408	0.121846	0.703398	0.20191	0.723673	0.95424	0.046599	0.779954	0.938879	0.0368302
k__Bacteria; p__Firmicutes; c__Clostridia; o__Clostridiales; f__Peptostreptococcaceae; g__Peptostreptococcaceae_noname; s__Clostridium_bartlettii	0.808089	0.9943	-0.0300046	0.086526	0.570844	-0.223173	0.900092	0.959167	-0.016555	0.924509	1	0.0124952	0.941415	0.983395	-0.00969138	0.882026	0.969451	0.0195684	0.00148089	0.108697	-0.401371	0.452384	0.929231	-0.0988529	0.20032	0.771591	-0.167684
k__Bacteria; p__Firmicutes; c__Clostridia; o__Clostridiales; f__Peptostreptococcaceae; g__Peptostreptococcaceae_noname; s__Clostridium_bifermentans	NA	NA	NA	NA	NA	NA	NA	NA	NA	NA	NA	NA	NA	NA	NA	NA	NA	NA	NA	NA	NA	NA	NA	NA	NA	NA	NA
k__Bacteria; p__Firmicutes; c__Clostridia; o__Clostridiales; f__Peptostreptococcaceae; g__Peptostreptococcaceae_noname; s__Clostridium_difficile	NA	NA	NA	NA	NA	NA	NA	NA	NA	NA	NA	NA	NA	NA	NA	NA	NA	NA	NA	NA	NA	NA	NA	NA	NA	NA	NA
k__Bacteria; p__Firmicutes; c__Clostridia; o__Clostridiales; f__Peptostreptococcaceae; g__Peptostreptococcaceae_noname; s__Clostridium_glycolicum	NA	NA	NA	NA	NA	NA	NA	NA	NA	NA	NA	NA	NA	NA	NA	NA	NA	NA	NA	NA	NA	NA	NA	NA	NA	NA	NA
k__Bacteria; p__Firmicutes; c__Clostridia; o__Clostridiales; f__Peptostreptococcaceae; g__Peptostreptococcaceae_noname; s__Clostridium_hiranonis	0.596439	0.9943	0.0653578	0.42326	0.820193	-0.105307	0.188921	0.776678	-0.171959	0.177364	0.991132	-0.176486	0.949062	0.983395	-0.00842455	0.691154	0.966487	-0.052356	0.688661	0.946958	0.0528013	0.862291	0.967221	0.0228716	0.275382	0.774195	-0.1431
k__Bacteria; p__Firmicutes; c__Clostridia; o__Clostridiales; f__Peptostreptococcaceae; g__Peptostreptococcaceae_noname; s__Clostridium_sordellii	NA	NA	NA	NA	NA	NA	NA	NA	NA	NA	NA	NA	NA	NA	NA	NA	NA	NA	NA	NA	NA	NA	NA	NA	NA	NA	NA
k__Bacteria; p__Firmicutes; c__Clostridia; o__Clostridiales; f__Peptostreptococcaceae; g__Peptostreptococcaceae_noname; s__Peptostreptococcaceae_noname_unclassified	0.239532	0.834311	0.14456	0.0338954	0.565436	-0.274353	0.240794	0.776678	-0.153766	0.478622	0.991132	-0.0932314	0.814921	0.968989	-0.0308619	0.980408	0.996228	-0.00323854	0.00595495	0.198679	-0.351063	0.691592	0.95424	-0.0522778	0.388632	0.774195	-0.113321
k__Bacteria; p__Firmicutes; c__Clostridia; o__Clostridiales; f__Peptostreptococcaceae; g__Peptostreptococcus; s__Peptostreptococcus_anaerobius	0.773565	0.9943	-0.0355384	0.972386	0.988368	0.00456496	0.188921	0.776678	-0.171959	0.912907	1	-0.0144225	0.583827	0.968989	-0.0721464	0.982163	0.996228	0.00294838	0.61002	0.940332	-0.0671854	0.507222	0.929231	0.0872874	0.827256	0.943894	-0.0287718
k__Bacteria; p__Firmicutes; c__Clostridia; o__Clostridiales; f__Peptostreptococcaceae; g__Peptostreptococcus; s__Peptostreptococcus_stomatis	0.614695	0.9943	0.062137	0.537996	0.860412	0.08108	0.502972	0.89861	0.0881595	0.213356	0.991132	0.163002	0.550025	0.968989	0.0787013	0.390305	0.906594	0.112925	0.54519	0.939298	0.0796544	0.338195	0.914483	0.125798	0.97358	0.987027	0.00436748
k__Bacteria; p__Firmicutes; c__Clostridia; o__Clostridiales; f__Peptostreptococcaceae; g__Peptostreptococcus; s__Peptostreptococcus_unclassified	0.758041	0.9943	-0.0380489	0.262417	0.709211	0.146986	0.820259	0.959167	0.0299565	0.642708	0.997978	0.0611209	0.0697975	0.968989	0.235734	0.105655	0.79889	0.210967	0.484744	0.90305	0.0919437	0.737522	0.95424	0.0441741	0.946423	0.979416	-0.00886161
k__Bacteria; p__Firmicutes; c__Clostridia; o__Clostridiales; f__Ruminococcaceae; g__Anaerotruncus; s__Anaerotruncus_colihominis	0.565349	0.9943	-0.0709461	0.143797	0.570844	-0.190993	0.695847	0.959167	0.0515195	0.0257692	0.991132	-0.287784	0.593054	0.968989	-0.0703877	0.813847	0.969451	-0.0310442	0.817821	0.971246	0.0303699	0.324587	0.914483	-0.129358	0.0823905	0.676872	-0.226086
k__Bacteria; p__Firmicutes; c__Clostridia; o__Clostridiales; f__Ruminococcaceae; g__Anaerotruncus; s__Anaerotruncus_unclassified	0.741876	0.9943	-0.0406797	0.726722	0.95557	0.0460639	0.132262	0.776678	0.196559	0.884005	0.998246	-0.0192377	0.884752	0.968989	-0.019113	0.973484	0.996228	0.00438325	0.186681	0.787493	0.17282	0.708926	0.95424	0.0491984	0.38607	0.774195	-0.113931
k__Bacteria; p__Firmicutes; c__Clostridia; o__Clostridiales; f__Ruminococcaceae; g__Faecalibacterium; s__Faecalibacterium_prausnitzii	0.93116	0.99498	0.0106733	0.290328	0.734829	-0.138767	0.186475	0.776678	0.1729	0.0828745	0.991132	0.225739	0.390518	0.968989	0.112874	0.269892	0.844179	0.14473	0.0332722	0.468347	-0.275281	0.0963043	0.754064	-0.216697	0.989494	0.992197	0.00173648
k__Bacteria; p__Firmicutes; c__Clostridia; o__Clostridiales; f__Ruminococcaceae; g__Ruminococcaceae_noname; s__Ruminococcaceae_bacterium_D16	0.528799	0.9943	-0.0777044	0.510657	0.840409	0.0865853	0.96551	0.988416	0.00570215	0.682376	0.997978	-0.0539264	0.476807	0.968989	-0.0936147	0.478457	0.929067	-0.0932662	0.128018	0.703398	0.1987	0.281872	0.914483	0.1412	0.400161	0.774195	-0.110609
k__Bacteria; p__Firmicutes; c__Clostridia; o__Clostridiales; f__Ruminococcaceae; g__Ruminococcus; s__Ruminococcus_albus	NA	NA	NA	NA	NA	NA	NA	NA	NA	NA	NA	NA	NA	NA	NA	NA	NA	NA	NA	NA	NA	NA	NA	NA	NA	NA	NA
k__Bacteria; p__Firmicutes; c__Clostridia; o__Clostridiales; f__Ruminococcaceae; g__Ruminococcus; s__Ruminococcus_bromii	0.634898	0.9943	0.0586205	0.356111	0.792077	-0.121243	0.659553	0.938589	0.0580453	0.901543	1	0.0163134	0.658891	0.968989	-0.0581656	0.618274	0.966487	-0.0656414	0.765736	0.946958	-0.0392776	0.452529	0.929231	-0.0988212	0.188411	0.771591	-0.172154
k__Bacteria; p__Firmicutes; c__Clostridia; o__Clostridiales; f__Ruminococcaceae; g__Ruminococcus; s__Ruminococcus_callidus	0.268807	0.834311	-0.135997	0.00263516	0.166165	-0.381478	0.408385	0.817469	-0.108701	0.738006	0.997978	-0.0440896	0.543734	0.968989	-0.0799422	0.385022	0.900019	-0.114181	0.0693798	0.684132	-0.236077	0.496232	0.929231	-0.0895503	0.00985142	0.354013	-0.330729
k__Bacteria; p__Firmicutes; c__Clostridia; o__Clostridiales; f__Ruminococcaceae; g__Ruminococcus; s__Ruminococcus_champanellensis	NA	NA	NA	NA	NA	NA	NA	NA	NA	NA	NA	NA	NA	NA	NA	NA	NA	NA	NA	NA	NA	NA	NA	NA	NA	NA	NA
k__Bacteria; p__Firmicutes; c__Clostridia; o__Clostridiales; f__Ruminococcaceae; g__Ruminococcus; s__Ruminococcus_lactaris	0.31685	0.854005	-0.123204	0.220766	0.669596	-0.16043	0.936097	0.981564	0.0105729	0.29129	0.991132	-0.138494	0.507187	0.968989	0.0872945	0.504333	0.940407	0.0878798	0.279774	0.799044	-0.141811	0.703459	0.95424	-0.0501667	0.0251518	0.504614	-0.288944
k__Bacteria; p__Firmicutes; c__Clostridia; o__Clostridiales; f__Ruminococcaceae; g__Ruminococcus; s__Ruminococcus_sp_5_1_39BFAA	0.866371	0.99498	0.0207889	0.101415	0.570844	-0.213514	0.506426	0.89861	0.0874503	0.0911334	0.991132	0.220054	0.475331	0.968989	0.0939271	0.758968	0.969451	0.0404471	0.00246684	0.150888	-0.383819	0.14936	0.830532	-0.188427	0.100219	0.707317	-0.214247
k__Bacteria; p__Firmicutes; c__Clostridia; o__Clostridiales; f__Ruminococcaceae; g__Ruminococcus; s__Ruminococcus_sp_JC304	0.520187	0.9943	0.0793299	0.0748007	0.570844	-0.231747	0.0567382	0.776678	-0.247342	0.649291	0.997978	-0.0599152	0.183731	0.968989	-0.173967	0.127806	0.79889	-0.198808	0.860742	0.976711	0.0231315	0.232945	0.914483	0.15633	0.340205	0.774195	-0.125279
k__Bacteria; p__Firmicutes; c__Clostridia; o__Clostridiales; f__Ruminococcaceae; g__Subdoligranulum; s__Subdoligranulum_sp_4_3_54A2FAA	0.245322	0.834311	0.142811	0.81072	0.975522	0.0315755	0.0567382	0.776678	-0.247342	0.615865	0.997978	0.066091	0.378426	0.968989	0.115763	0.67032	0.966487	0.0560955	0.386104	0.867209	0.113923	0.21719	0.914483	0.161664	0.855748	0.945987	0.0239698
k__Bacteria; p__Firmicutes; c__Clostridia; o__Clostridiales; f__Ruminococcaceae; g__Subdoligranulum; s__Subdoligranulum_unclassified	0.261492	0.834311	0.138075	0.0846496	0.570844	-0.224481	0.295006	0.776678	0.137442	0.862654	0.997978	-0.0228107	0.330406	0.968989	0.127824	0.146768	0.79889	0.189613	0.422997	0.878347	-0.10514	0.186342	0.914483	-0.17277	0.459988	0.781856	-0.0972058
k__Bacteria; p__Firmicutes; c__Clostridia; o__Clostridiales; f__Ruminococcaceae; g__Subdoligranulum; s__Subdoligranulum_variabile	NA	NA	NA	NA	NA	NA	NA	NA	NA	NA	NA	NA	NA	NA	NA	NA	NA	NA	NA	NA	NA	NA	NA	NA	NA	NA	NA
k__Bacteria; p__Firmicutes; c__Erysipelotrichia; o__Erysipelotrichales; f__Erysipelotrichaceae; g__Bulleidia; s__Bulleidia_extructa	0.91299	0.99498	0.0135003	0.689102	0.933212	0.0527224	0.345275	0.776678	-0.12398	0.390537	0.991132	0.11287	0.91708	0.982391	0.0137291	0.845254	0.969451	0.0257345	0.575066	0.939298	-0.0738281	0.620201	0.95424	0.0652823	0.117184	0.756594	-0.204418
k__Bacteria; p__Firmicutes; c__Erysipelotrichia; o__Erysipelotrichales; f__Erysipelotrichaceae; g__Catenibacterium; s__Catenibacterium_mitsuokai	0.820387	0.9943	-0.0280481	0.376662	0.800263	-0.116189	0.0857993	0.776678	-0.223677	0.264042	0.991132	-0.146492	0.134147	0.968989	-0.195626	0.166278	0.818361	-0.181035	0.877126	0.979709	-0.0203873	0.777498	0.95424	0.0372521	0.0495529	0.676872	-0.254686
k__Bacteria; p__Firmicutes; c__Erysipelotrichia; o__Erysipelotrichales; f__Erysipelotrichaceae; g__Coprobacillus; s__Coprobacillus_sp_29_1	0.438382	0.938256	0.0955297	0.0749265	0.570844	0.231649	0.732546	0.959167	0.0450436	0.178788	0.991132	0.175917	0.485554	0.968989	0.0917738	0.672724	0.966487	0.0556618	0.595806	0.940332	0.0698657	0.304734	0.914483	0.134728	0.533693	0.802726	0.0819371
k__Bacteria; p__Firmicutes; c__Erysipelotrichia; o__Erysipelotrichales; f__Erysipelotrichaceae; g__Coprobacillus; s__Coprobacillus_unclassified	0.529183	0.9943	0.0776322	0.262088	0.709211	-0.147086	0.551918	0.918045	-0.0783293	0.0823291	0.991132	-0.22613	0.73612	0.968989	-0.0444189	0.177002	0.819774	-0.176631	0.175359	0.777499	0.177293	0.958626	0.98866	-0.00684127	0.439122	0.774195	-0.101762
k__Bacteria; p__Firmicutes; c__Erysipelotrichia; o__Erysipelotrichales; f__Erysipelotrichaceae; g__Eggerthia; s__Eggerthia_catenaformis	NA	NA	NA	NA	NA	NA	NA	NA	NA	NA	NA	NA	NA	NA	NA	NA	NA	NA	NA	NA	NA	NA	NA	NA	NA	NA	NA
k__Bacteria; p__Firmicutes; c__Erysipelotrichia; o__Erysipelotrichales; f__Erysipelotrichaceae; g__Erysipelotrichaceae_noname; s__Clostridium_innocuum	0.729424	0.9943	0.0427185	0.461924	0.820193	-0.0967888	0.59395	0.918045	0.0702176	0.134172	0.991132	-0.195613	0.234611	0.968989	-0.155781	0.642782	0.966487	-0.0611074	0.758128	0.946958	0.0405923	0.473955	0.929231	-0.0942189	0.694435	0.897385	-0.051771
k__Bacteria; p__Firmicutes; c__Erysipelotrichia; o__Erysipelotrichales; f__Erysipelotrichaceae; g__Erysipelotrichaceae_noname; s__Clostridium_ramosum	0.962205	0.99498	-0.00585497	0.41379	0.820193	-0.10746	0.891218	0.959167	0.0180339	0.382369	0.991132	-0.114815	0.720694	0.968989	-0.0471227	0.296755	0.844179	-0.136949	0.484509	0.90305	0.091993	0.695719	0.95424	0.0515422	0.460961	0.781856	-0.0969962
k__Bacteria; p__Firmicutes; c__Erysipelotrichia; o__Erysipelotrichales; f__Erysipelotrichaceae; g__Erysipelotrichaceae_noname; s__Clostridium_spiroforme	NA	NA	NA	NA	NA	NA	NA	NA	NA	NA	NA	NA	NA	NA	NA	NA	NA	NA	NA	NA	NA	NA	NA	NA	NA	NA	NA
k__Bacteria; p__Firmicutes; c__Erysipelotrichia; o__Erysipelotrichales; f__Erysipelotrichaceae; g__Erysipelotrichaceae_noname; s__Erysipelotrichaceae_bacterium_2_2_44A	0.548223	0.9943	0.0740856	0.47553	0.820193	-0.0938849	0.0703138	0.776678	0.235312	0.553217	0.991132	-0.0780744	0.459324	0.968989	0.0973491	0.266037	0.844179	0.145888	0.878268	0.979709	-0.0201964	0.196925	0.914483	-0.168938	0.73805	0.922008	0.0440819
k__Bacteria; p__Firmicutes; c__Erysipelotrichia; o__Erysipelotrichales; f__Erysipelotrichaceae; g__Erysipelotrichaceae_noname; s__Erysipelotrichaceae_bacterium_21_3	0.538137	0.9943	-0.0759568	0.590137	0.897932	0.0709424	0.669283	0.938589	0.0562828	0.489713	0.991132	0.0909047	0.948487	0.983395	-0.00851971	0.424644	0.929067	0.104995	0.772589	0.948295	-0.0380963	0.46866	0.929231	0.0953457	0.643766	0.868611	0.0609268
k__Bacteria; p__Firmicutes; c__Erysipelotrichia; o__Erysipelotrichales; f__Erysipelotrichaceae; g__Erysipelotrichaceae_noname; s__Erysipelotrichaceae_bacterium_3_1_53	0.781333	0.9943	0.0342875	0.844753	0.988368	-0.0258188	0.358148	0.776678	0.120735	0.48556	0.991132	0.0917727	0.793097	0.968989	0.0345789	0.745567	0.969451	0.042772	0.410321	0.878347	-0.108256	0.426872	0.929231	-0.104493	0.385059	0.774195	-0.114172
k__Bacteria; p__Firmicutes; c__Erysipelotrichia; o__Erysipelotrichales; f__Erysipelotrichaceae; g__Erysipelotrichaceae_noname; s__Erysipelotrichaceae_bacterium_5_2_54FAA	0.366122	0.894964	0.11132	0.871545	0.988368	0.0213211	0.779673	0.959167	-0.0368784	0.497721	0.991132	-0.0892422	0.404969	0.968989	-0.109491	0.945761	0.987158	-0.00897132	0.251642	0.799044	-0.150315	0.658086	0.95424	-0.0583119	0.19669	0.771591	-0.169026
k__Bacteria; p__Firmicutes; c__Erysipelotrichia; o__Erysipelotrichales; f__Erysipelotrichaceae; g__Erysipelotrichaceae_noname; s__Erysipelotrichaceae_bacterium_6_1_45	0.978976	0.99498	0.00325604	0.326873	0.773952	-0.128754	0.196221	0.776678	0.169201	0.979597	1	-0.00337255	0.773316	0.968989	-0.0379712	0.949501	0.987158	0.00835189	0.423852	0.878347	-0.105174	0.105629	0.754064	-0.210982	0.308449	0.774195	-0.133707
k__Bacteria; p__Firmicutes; c__Erysipelotrichia; o__Erysipelotrichales; f__Erysipelotrichaceae; g__Erysipelotrichaceae_noname; s__Eubacterium_biforme	0.504511	0.992898	-0.082324	0.851376	0.988368	-0.0247044	0.485961	0.89861	-0.0916887	0.54954	0.991132	-0.0787969	0.265927	0.968989	-0.145921	0.276116	0.844179	-0.142883	0.512035	0.92	-0.0863043	0.303518	0.914483	-0.135064	0.0630574	0.676872	-0.241483
k__Bacteria; p__Firmicutes; c__Erysipelotrichia; o__Erysipelotrichales; f__Erysipelotrichaceae; g__Erysipelotrichaceae_noname; s__Eubacterium_cylindroides	0.979795	0.99498	-0.00312921	0.853978	0.988368	-0.0242671	0.902538	0.959167	-0.0161476	0.234302	0.991132	0.155883	0.312916	0.968989	0.132489	0.313697	0.844179	0.132277	0.642263	0.940332	0.0612026	0.850096	0.967221	0.0249196	0.790975	0.943894	-0.0349417
k__Bacteria; p__Firmicutes; c__Erysipelotrichia; o__Erysipelotrichales; f__Erysipelotrichaceae; g__Erysipelotrichaceae_noname; s__Eubacterium_dolichum	0.642202	0.9943	-0.0573608	0.494287	0.825254	-0.0899534	0.907204	0.959493	-0.015371	0.921535	1	0.0129891	0.330039	0.968989	-0.127921	0.237886	0.844179	-0.154709	0.5203	0.926561	-0.084627	0.36163	0.92437	-0.119869	0.22975	0.77311	-0.157391
k__Bacteria; p__Firmicutes; c__Erysipelotrichia; o__Erysipelotrichales; f__Erysipelotrichaceae; g__Holdemania; s__Holdemania_filiformis	0.49771	0.989794	0.0836378	0.298494	0.745221	0.136462	0.0934534	0.776678	0.218529	0.454512	0.991132	-0.0983904	0.453282	0.968989	-0.0986575	0.354535	0.861685	-0.121638	0.41875	0.878347	0.106329	0.609337	0.95424	-0.0673135	0.383132	0.774195	-0.114632
k__Bacteria; p__Firmicutes; c__Erysipelotrichia; o__Erysipelotrichales; f__Erysipelotrichaceae; g__Holdemania; s__Holdemania_sp_AP2	0.254655	0.834311	-0.140052	0.262814	0.709211	0.146865	0.603952	0.918045	0.0683261	0.11871	0.991132	0.203589	0.1258	0.968989	0.19984	0.112997	0.79889	0.206737	0.627646	0.940332	0.0638988	0.407075	0.929231	-0.109004	0.359913	0.774195	0.120295
k__Bacteria; p__Firmicutes; c__Erysipelotrichia; o__Erysipelotrichales; f__Erysipelotrichaceae; g__Holdemania; s__Holdemania_unclassified	0.959253	0.99498	-0.00631264	0.390716	0.809335	-0.112828	0.0713998	0.776678	0.234433	0.992252	1	0.00128064	0.701933	0.968989	0.0504375	0.871649	0.969451	0.0213036	0.5038	0.919874	-0.0879892	0.174636	0.889487	-0.177586	0.865746	0.945987	0.0222924
k__Bacteria; p__Firmicutes; c__Erysipelotrichia; o__Erysipelotrichales; f__Erysipelotrichaceae; g__Solobacterium; s__Solobacterium_moorei	0.188837	0.804081	0.161294	0.984775	0.990171	-0.00251655	0.124126	0.776678	-0.20071	0.834526	0.997978	0.0275432	0.649456	0.968989	0.0598851	0.842515	0.969451	0.0261959	0.868737	0.977995	-0.0217912	0.398019	0.929231	0.111109	0.17895	0.771591	-0.175853
k__Bacteria; p__Firmicutes; c__Erysipelotrichia; o__Erysipelotrichales; f__Erysipelotrichaceae; g__Turicibacter; s__Turicibacter_sanguinis	0.664583	0.9943	0.0535358	0.0767943	0.570844	-0.230217	0.188921	0.776678	-0.171959	0.91462	1	-0.0141379	0.617994	0.968989	0.0656936	0.875356	0.969451	0.0206833	0.0524877	0.583727	-0.251588	0.861226	0.967221	0.0230503	0.0752162	0.676872	-0.231425
k__Bacteria; p__Firmicutes; c__Erysipelotrichia; o__Erysipelotrichales; f__Erysipelotrichaceae; g__Turicibacter; s__Turicibacter_unclassified	0.809897	0.9943	0.0297165	0.0181637	0.555507	-0.304103	0.103265	0.776678	-0.212392	0.533191	0.991132	-0.0820373	0.644407	0.968989	-0.0608093	0.639825	0.966487	-0.0616506	0.0208378	0.372072	-0.297798	0.864439	0.967221	0.0225114	0.0265865	0.504614	-0.286284
k__Bacteria; p__Firmicutes; c__Negativicutes; o__Selenomonadales; f__Acidaminococcaceae; g__Acidaminococcus; s__Acidaminococcus_fermentans	0.321399	0.855057	0.12206	0.573349	0.891607	0.074159	0.172564	0.776678	-0.17843	0.309282	0.991132	-0.133479	0.705208	0.968989	-0.0498567	0.692884	0.966487	-0.0520474	0.72266	0.946958	-0.0467771	0.401656	0.929231	-0.11026	0.244151	0.77311	-0.152687
k__Bacteria; p__Firmicutes; c__Negativicutes; o__Selenomonadales; f__Acidaminococcaceae; g__Acidaminococcus; s__Acidaminococcus_intestini	0.665234	0.9943	0.0534254	0.037395	0.570844	-0.269388	0.440415	0.859746	-0.101476	0.317466	0.991132	-0.13126	0.107504	0.968989	-0.209881	0.196201	0.819774	-0.169208	0.0967196	0.684132	-0.216433	0.498105	0.929231	-0.0891628	0.0514568	0.676872	-0.25266
k__Bacteria; p__Firmicutes; c__Negativicutes; o__Selenomonadales; f__Acidaminococcaceae; g__Acidaminococcus; s__Acidaminococcus_sp_D21	NA	NA	NA	NA	NA	NA	NA	NA	NA	NA	NA	NA	NA	NA	NA	NA	NA	NA	NA	NA	NA	NA	NA	NA	NA	NA	NA
k__Bacteria; p__Firmicutes; c__Negativicutes; o__Selenomonadales; f__Acidaminococcaceae; g__Acidaminococcus; s__Acidaminococcus_unclassified	0.127973	0.770971	-0.186421	0.919882	0.988368	-0.0132635	0.4537	0.867229	0.0985667	0.84096	0.997978	0.0264578	0.938168	0.983395	0.0102295	0.907651	0.985527	0.0152966	0.623954	0.940332	-0.064584	0.0345699	0.754064	-0.273364	0.858641	0.945987	0.023484
k__Bacteria; p__Firmicutes; c__Negativicutes; o__Selenomonadales; f__Acidaminococcaceae; g__Phascolarctobacterium; s__Phascolarctobacterium_succinatutens	0.445605	0.943634	-0.0940367	0.624924	0.916773	-0.0644039	0.83356	0.959167	-0.0277063	0.602585	0.997978	-0.0685839	0.466885	0.968989	-0.0957249	0.252905	0.844179	-0.14992	0.508662	0.92	0.0869927	0.732544	0.95424	0.0450441	0.0759605	0.676872	-0.230853
k__Bacteria; p__Firmicutes; c__Negativicutes; o__Selenomonadales; f__Veillonellaceae; g__Anaeroglobus; s__Anaeroglobus_geminatus	NA	NA	NA	NA	NA	NA	NA	NA	NA	NA	NA	NA	NA	NA	NA	NA	NA	NA	NA	NA	NA	NA	NA	NA	NA	NA	NA
k__Bacteria; p__Firmicutes; c__Negativicutes; o__Selenomonadales; f__Veillonellaceae; g__Dialister; s__Dialister_invisus	0.328204	0.855057	-0.120368	0.0997237	0.570844	0.214553	0.638182	0.922758	0.0619529	0.0246167	0.991132	0.289969	0.241267	0.968989	0.153614	0.675204	0.966487	0.0552151	0.314543	0.799044	-0.132048	0.821999	0.963	0.0296616	0.430435	0.774195	0.103695
k__Bacteria; p__Firmicutes; c__Negativicutes; o__Selenomonadales; f__Veillonellaceae; g__Dialister; s__Dialister_micraerophilus	NA	NA	NA	NA	NA	NA	NA	NA	NA	NA	NA	NA	NA	NA	NA	NA	NA	NA	NA	NA	NA	NA	NA	NA	NA	NA	NA
k__Bacteria; p__Firmicutes; c__Negativicutes; o__Selenomonadales; f__Veillonellaceae; g__Dialister; s__Dialister_succinatiphilus	0.214413	0.834311	0.152501	0.141541	0.570844	-0.192054	0.358786	0.776678	-0.120576	0.855856	0.997978	0.0239517	0.314833	0.968989	0.131969	0.375276	0.884702	0.116525	0.0885801	0.684132	-0.221766	0.886665	0.975097	0.0187938	0.316303	0.774195	-0.131573
k__Bacteria; p__Firmicutes; c__Negativicutes; o__Selenomonadales; f__Veillonellaceae; g__Megamonas; s__Megamonas_funiformis	0.825639	0.9943	0.0272147	0.168809	0.607382	-0.179978	0.814399	0.959167	0.0309505	0.871365	0.997978	-0.0213512	0.988583	0.993493	0.00188698	0.801855	0.969451	-0.0330842	0.986343	0.997838	0.00225728	0.55183	0.929231	-0.0783466	0.080798	0.676872	-0.227238
k__Bacteria; p__Firmicutes; c__Negativicutes; o__Selenomonadales; f__Veillonellaceae; g__Megamonas; s__Megamonas_hypermegale	0.421759	0.938256	-0.0990193	0.0731025	0.570844	-0.233076	0.510383	0.900531	-0.0866412	0.655626	0.997978	-0.0587595	0.482499	0.968989	0.0924148	0.609173	0.966487	0.0673442	0.115119	0.703398	-0.205554	0.1749	0.889487	-0.177479	0.0147956	0.436364	-0.313284
k__Bacteria; p__Firmicutes; c__Negativicutes; o__Selenomonadales; f__Veillonellaceae; g__Megamonas; s__Megamonas_rupellensis	0.280211	0.834311	-0.132832	0.211536	0.666652	-0.163643	0.289755	0.776678	-0.138931	0.722327	0.997978	-0.0468356	0.300025	0.968989	0.136034	0.410003	0.922155	0.108329	0.211133	0.799044	-0.163786	0.5545	0.929231	-0.0778229	0.0386718	0.591356	-0.267673
k__Bacteria; p__Firmicutes; c__Negativicutes; o__Selenomonadales; f__Veillonellaceae; g__Megamonas; s__Megamonas_unclassified	0.0768057	0.770971	-0.21605	0.537363	0.860412	-0.0812058	0.632136	0.922758	0.0630679	0.863546	0.997978	0.0226612	0.395796	0.968989	0.11163	0.52865	0.940407	0.0829459	0.575335	0.939298	-0.0737762	0.277821	0.914483	-0.142382	0.059409	0.676872	-0.244805
k__Bacteria; p__Firmicutes; c__Negativicutes; o__Selenomonadales; f__Veillonellaceae; g__Megasphaera; s__Megasphaera_elsdenii	0.294629	0.837576	0.12895	0.457894	0.820193	-0.0976578	0.957185	0.988416	-0.00707975	0.618336	0.997978	-0.0656299	0.957156	0.983967	-0.00708458	0.780221	0.969451	0.0367844	0.481871	0.90305	-0.0925469	0.528464	0.929231	-0.0829832	0.415249	0.774195	-0.107126
k__Bacteria; p__Firmicutes; c__Negativicutes; o__Selenomonadales; f__Veillonellaceae; g__Megasphaera; s__Megasphaera_micronuciformis	0.85451	0.99498	0.0226536	0.00410352	0.188249	0.365313	0.757661	0.959167	-0.0406732	0.100333	0.991132	0.214177	0.0412907	0.968989	0.264295	0.0584872	0.79889	0.24567	0.0714329	0.684132	0.234406	0.13473	0.815995	0.195339	0.0173922	0.436364	0.306069
k__Bacteria; p__Firmicutes; c__Negativicutes; o__Selenomonadales; f__Veillonellaceae; g__Megasphaera; s__Megasphaera_unclassified	0.430473	0.938256	-0.0971805	0.325411	0.773952	-0.12914	0.862644	0.959167	0.0228124	0.37003	0.991132	-0.117801	0.71771	0.968989	-0.047648	0.516341	0.940407	0.0854286	0.296434	0.799044	-0.13704	0.234751	0.914483	-0.155735	0.162809	0.771591	-0.182504
k__Bacteria; p__Firmicutes; c__Negativicutes; o__Selenomonadales; f__Veillonellaceae; g__Mitsuokella; s__Mitsuokella_multacida	0.440696	0.938256	0.0950499	0.754769	0.95557	0.0411742	0.626806	0.922758	0.0640546	0.613094	0.997978	0.0666094	0.842137	0.968989	0.0262595	0.753144	0.969451	0.041456	0.106159	0.695724	-0.210669	0.492927	0.929231	0.0902357	0.501946	0.787803	0.0883706
k__Bacteria; p__Firmicutes; c__Negativicutes; o__Selenomonadales; f__Veillonellaceae; g__Mitsuokella; s__Mitsuokella_unclassified	0.39213	0.929842	0.105441	0.344139	0.792077	-0.12427	0.358786	0.776678	-0.120576	0.346178	0.991132	-0.12375	0.157592	0.968989	-0.184757	0.28924	0.844179	-0.139078	0.548844	0.939298	-0.0789338	0.44037	0.929231	0.101486	0.710784	0.901507	-0.0488699
k__Bacteria; p__Firmicutes; c__Negativicutes; o__Selenomonadales; f__Veillonellaceae; g__Selenomonas; s__Selenomonas_noxia	0.178875	0.770971	-0.164951	NA	NA	NA	NA	NA	NA	NA	NA	NA	NA	NA	NA	NA	NA	NA	NA	NA	NA	NA	NA	NA	NA	NA	NA
k__Bacteria; p__Firmicutes; c__Negativicutes; o__Selenomonadales; f__Veillonellaceae; g__Veillonella; s__Veillonella_atypica	0.376991	0.90478	-0.108833	0.139703	0.570844	0.192929	0.13311	0.776678	-0.196138	0.239499	0.991132	-0.154185	0.626104	0.968989	-0.0641848	0.577	0.966487	-0.0734559	0.00324134	0.169939	0.374022	0.075468	0.754064	0.231231	0.828158	0.943894	0.0286193
k__Bacteria; p__Firmicutes; c__Negativicutes; o__Selenomonadales; f__Veillonellaceae; g__Veillonella; s__Veillonella_dispar	0.554681	0.9943	-0.0728963	0.135144	0.570844	0.195135	0.282703	0.776678	-0.140959	0.958066	1	-0.006934	0.532912	0.968989	0.0820931	0.777911	0.969451	0.0371811	0.0362802	0.468347	0.270926	0.272557	0.914483	0.143936	0.862246	0.945987	0.0228791
k__Bacteria; p__Firmicutes; c__Negativicutes; o__Selenomonadales; f__Veillonellaceae; g__Veillonella; s__Veillonella_parvula	0.206855	0.827718	0.155018	0.115267	0.570844	0.205472	0.901685	0.959167	-0.0162897	0.394695	0.991132	0.111889	0.171994	0.968989	0.178663	0.817605	0.969451	0.0304065	0.272251	0.799044	0.144027	0.569512	0.93373	0.0749002	0.272296	0.774195	0.144013
k__Bacteria; p__Firmicutes; c__Negativicutes; o__Selenomonadales; f__Veillonellaceae; g__Veillonella; s__Veillonella_unclassified	0.279649	0.834311	0.132986	0.19891	0.663637	0.168203	0.811021	0.959167	0.0315243	0.634554	0.997978	0.0626214	0.209012	0.968989	0.164539	0.598528	0.966487	0.0693501	0.298138	0.799044	0.136562	0.993717	0.993717	-0.00103849	0.167029	0.771591	0.18072
k__Bacteria; p__Fusobacteria; c__Fusobacteriia; o__Fusobacteriales; f__Fusobacteriaceae; g__Fusobacterium; s__Fusobacterium_gonidiaformans	0.820624	0.9943	-0.0280105	0.141541	0.570844	0.192054	0.358786	0.776678	-0.120576	0.448048	0.991132	0.0997987	0.547586	0.968989	0.0791817	0.345032	0.844179	0.124042	0.668738	0.940332	0.0563813	0.345046	0.914483	0.124039	0.359913	0.774195	0.120295
k__Bacteria; p__Fusobacteria; c__Fusobacteriia; o__Fusobacteriales; f__Fusobacteriaceae; g__Fusobacterium; s__Fusobacterium_mortiferum	0.230147	0.834311	-0.147456	0.45507	0.820193	-0.0982693	0.393157	0.794381	-0.112251	0.598894	0.997978	0.069281	0.390832	0.968989	-0.1128	0.58024	0.966487	-0.0728336	0.848869	0.973546	0.0251262	0.980578	0.98866	0.00321033	0.0666455	0.676872	-0.238364
k__Bacteria; p__Fusobacteria; c__Fusobacteriia; o__Fusobacteriales; f__Fusobacteriaceae; g__Fusobacterium; s__Fusobacterium_nucleatum	0.919772	0.99498	-0.0124445	0.0846184	0.570844	0.224502	0.780503	0.959167	-0.036736	0.586037	0.991132	0.0717241	0.876358	0.968989	0.0205158	0.912926	0.987158	0.0144195	0.988428	0.997838	-0.00191273	0.769107	0.95424	0.0386961	0.790505	0.943894	-0.0350221
k__Bacteria; p__Fusobacteria; c__Fusobacteriia; o__Fusobacteriales; f__Fusobacteriaceae; g__Fusobacterium; s__Fusobacterium_ulcerans	0.421225	0.938256	-0.0991328	0.828076	0.983507	0.0286331	0.700487	0.959167	0.0506942	0.97931	1	-0.00342004	0.7223	0.968989	0.0468404	0.705634	0.966487	-0.0497812	0.542691	0.939298	-0.0801486	0.252044	0.914483	0.150189	0.864241	0.945987	-0.0225446
k__Bacteria; p__Fusobacteria; c__Fusobacteriia; o__Fusobacteriales; f__Fusobacteriaceae; g__Fusobacterium; s__Fusobacterium_varium	0.589855	0.9943	-0.0665299	0.236585	0.700217	-0.155134	0.883269	0.959167	0.0193608	0.165285	0.991132	-0.181453	0.968832	0.990422	-0.00515265	0.599348	0.966487	-0.0691951	0.965048	0.997838	0.00577859	0.659803	0.95424	-0.0579999	0.581543	0.83127	-0.0725838
k__Bacteria; p__Proteobacteria; c__Alphaproteobacteria; o__Rhodobacterales; f__Rhodobacteraceae; g__Paracoccus; s__Paracoccus_denitrificans	NA	NA	NA	NA	NA	NA	NA	NA	NA	NA	NA	NA	NA	NA	NA	NA	NA	NA	NA	NA	NA	NA	NA	NA	NA	NA	NA
k__Bacteria; p__Proteobacteria; c__Alphaproteobacteria; o__Rhodobacterales; f__Rhodobacteraceae; g__Paracoccus; s__Paracoccus_unclassified	NA	NA	NA	NA	NA	NA	NA	NA	NA	NA	NA	NA	NA	NA	NA	NA	NA	NA	NA	NA	NA	NA	NA	NA	NA	NA	NA
k__Bacteria; p__Proteobacteria; c__Alphaproteobacteria; o__Sphingomonadales; f__Sphingomonadaceae; g__Sphingomonas; s__Sphingomonas_echinoides	NA	NA	NA	NA	NA	NA	NA	NA	NA	NA	NA	NA	NA	NA	NA	NA	NA	NA	NA	NA	NA	NA	NA	NA	NA	NA	NA
k__Bacteria; p__Proteobacteria; c__Betaproteobacteria; o__Burkholderiales; f__Alcaligenaceae; g__Pusillimonas; s__Pusillimonas_unclassified	NA	NA	NA	NA	NA	NA	NA	NA	NA	NA	NA	NA	NA	NA	NA	NA	NA	NA	NA	NA	NA	NA	NA	NA	NA	NA	NA
k__Bacteria; p__Proteobacteria; c__Betaproteobacteria; o__Burkholderiales; f__Burkholderiaceae; g__Lautropia; s__Lautropia_mirabilis	0.0689603	0.770971	-0.221903	0.886454	0.988368	0.0188288	0.902964	0.959167	0.0160767	1	1	0	0.157592	0.968989	-0.184757	0.797484	0.969451	0.0338297	0.475134	0.90305	0.0939688	0.375289	0.92437	0.116521	0.753747	0.92282	-0.0413514
k__Bacteria; p__Proteobacteria; c__Betaproteobacteria; o__Burkholderiales; f__Burkholderiaceae; g__Ralstonia; s__Ralstonia_pickettii	0.109049	0.770971	0.196073	0.977219	0.988368	-0.00376577	0.358786	0.776678	-0.120576	0.346178	0.991132	-0.12375	0.886311	0.968989	-0.0188528	0.158907	0.79889	-0.184184	0.316364	0.799044	-0.131556	0.797489	0.95424	-0.0338288	0.423478	0.774195	-0.105258
k__Bacteria; p__Proteobacteria; c__Betaproteobacteria; o__Burkholderiales; f__Burkholderiaceae; g__Ralstonia; s__Ralstonia_unclassified	0.178875	0.770971	-0.164951	NA	NA	NA	NA	NA	NA	NA	NA	NA	NA	NA	NA	NA	NA	NA	NA	NA	NA	NA	NA	NA	NA	NA	NA
k__Bacteria; p__Proteobacteria; c__Betaproteobacteria; o__Burkholderiales; f__Burkholderiales_noname; g__Burkholderiales_noname; s__Burkholderiales_bacterium_1_1_47	0.26582	0.834311	0.136841	0.618083	0.916773	0.065677	0.899623	0.959167	-0.0166331	0.270902	0.991132	0.144428	0.499394	0.968989	0.0888966	0.695111	0.966487	0.0516505	0.435535	0.878347	0.102557	0.53362	0.929231	0.0819517	0.678706	0.894044	-0.0545852
k__Bacteria; p__Proteobacteria; c__Betaproteobacteria; o__Burkholderiales; f__Comamonadaceae; g__Comamonas; s__Comamonas_unclassified	NA	NA	NA	NA	NA	NA	NA	NA	NA	NA	NA	NA	NA	NA	NA	NA	NA	NA	NA	NA	NA	NA	NA	NA	NA	NA	NA
k__Bacteria; p__Proteobacteria; c__Betaproteobacteria; o__Burkholderiales; f__Oxalobacteraceae; g__Oxalobacter; s__Oxalobacter_formigenes	0.872375	0.99498	-0.0198468	0.141541	0.570844	0.192054	0.358786	0.776678	-0.120576	0.448048	0.991132	0.0997987	0.547586	0.968989	0.0791817	0.345032	0.844179	0.124042	0.668738	0.940332	0.0563813	0.345046	0.914483	0.124039	0.359913	0.774195	0.120295
k__Bacteria; p__Proteobacteria; c__Betaproteobacteria; o__Burkholderiales; f__Sutterellaceae; g__Parasutterella; s__Parasutterella_excrementihominis	0.345195	0.865171	0.116237	0.944751	0.988368	-0.00913864	0.419899	0.832988	-0.106068	0.655362	0.997978	0.0588076	0.916833	0.982391	0.0137702	0.742087	0.969451	0.043378	0.829981	0.971246	0.0283109	0.89296	0.975097	0.0177434	0.190232	0.771591	-0.171458
k__Bacteria; p__Proteobacteria; c__Betaproteobacteria; o__Burkholderiales; f__Sutterellaceae; g__Sutterella; s__Sutterella_parvirubra	0.598385	0.9943	0.0650124	0.268228	0.718537	0.145228	0.188921	0.776678	-0.171959	0.792503	0.997978	-0.0346805	0.993493	0.993493	-0.00107547	0.477565	0.929067	0.0934546	0.0463097	0.531115	0.258289	0.0196714	0.754064	0.300458	0.197569	0.771591	0.168699
k__Bacteria; p__Proteobacteria; c__Betaproteobacteria; o__Burkholderiales; f__Sutterellaceae; g__Sutterella; s__Sutterella_wadsworthensis	0.822718	0.9943	-0.027678	0.349277	0.792077	-0.122964	0.904282	0.959167	0.0158573	0.927252	1	-0.01204	0.981884	0.993493	-0.00299438	0.938767	0.987158	-0.0101302	0.0105858	0.276453	-0.327715	0.912177	0.976808	-0.0145439	0.340408	0.774195	-0.125227
k__Bacteria; p__Proteobacteria; c__Betaproteobacteria; o__Neisseriales; f__Neisseriaceae; g__Eikenella; s__Eikenella_corrodens	0.178875	0.770971	-0.164951	NA	NA	NA	NA	NA	NA	NA	NA	NA	NA	NA	NA	NA	NA	NA	NA	NA	NA	NA	NA	NA	NA	NA	NA
k__Bacteria; p__Proteobacteria; c__Betaproteobacteria; o__Neisseriales; f__Neisseriaceae; g__Neisseria; s__Neisseria_elongata	NA	NA	NA	NA	NA	NA	NA	NA	NA	NA	NA	NA	NA	NA	NA	NA	NA	NA	NA	NA	NA	NA	NA	NA	NA	NA	NA
k__Bacteria; p__Proteobacteria; c__Betaproteobacteria; o__Neisseriales; f__Neisseriaceae; g__Neisseria; s__Neisseria_flavescens	0.178875	0.770971	-0.164951	NA	NA	NA	NA	NA	NA	NA	NA	NA	NA	NA	NA	NA	NA	NA	NA	NA	NA	NA	NA	NA	NA	NA	NA
k__Bacteria; p__Proteobacteria; c__Betaproteobacteria; o__Neisseriales; f__Neisseriaceae; g__Neisseria; s__Neisseria_meningitidis	0.178875	0.770971	-0.164951	NA	NA	NA	NA	NA	NA	NA	NA	NA	NA	NA	NA	NA	NA	NA	NA	NA	NA	NA	NA	NA	NA	NA	NA
k__Bacteria; p__Proteobacteria; c__Betaproteobacteria; o__Neisseriales; f__Neisseriaceae; g__Neisseria; s__Neisseria_sicca	0.178875	0.770971	-0.164951	NA	NA	NA	NA	NA	NA	NA	NA	NA	NA	NA	NA	NA	NA	NA	NA	NA	NA	NA	NA	NA	NA	NA	NA
k__Bacteria; p__Proteobacteria; c__Betaproteobacteria; o__Neisseriales; f__Neisseriaceae; g__Neisseria; s__Neisseria_subflava	0.178875	0.770971	-0.164951	NA	NA	NA	NA	NA	NA	NA	NA	NA	NA	NA	NA	NA	NA	NA	NA	NA	NA	NA	NA	NA	NA	NA	NA
k__Bacteria; p__Proteobacteria; c__Betaproteobacteria; o__Neisseriales; f__Neisseriaceae; g__Neisseria; s__Neisseria_unclassified	0.178875	0.770971	-0.164951	NA	NA	NA	NA	NA	NA	NA	NA	NA	NA	NA	NA	NA	NA	NA	NA	NA	NA	NA	NA	NA	NA	NA	NA
k__Bacteria; p__Proteobacteria; c__Deltaproteobacteria; o__Desulfovibrionales; f__Desulfovibrionaceae; g__Bilophila; s__Bilophila_sp_4_1_30	0.899771	0.99498	-0.0155614	NA	NA	NA	NA	NA	NA	NA	NA	NA	NA	NA	NA	NA	NA	NA	NA	NA	NA	NA	NA	NA	NA	NA	NA
k__Bacteria; p__Proteobacteria; c__Deltaproteobacteria; o__Desulfovibrionales; f__Desulfovibrionaceae; g__Bilophila; s__Bilophila_unclassified	0.218651	0.834311	-0.151118	0.604184	0.907343	0.0682825	0.132121	0.776678	0.19663	0.751399	0.997978	-0.0417587	0.712514	0.968989	-0.0485643	0.790087	0.969451	0.0350936	0.216689	0.799044	0.161838	0.698463	0.95424	0.0510539	0.401618	0.774195	0.110269
k__Bacteria; p__Proteobacteria; c__Deltaproteobacteria; o__Desulfovibrionales; f__Desulfovibrionaceae; g__Bilophila; s__Bilophila_wadsworthia	0.0503028	0.770971	-0.238353	0.484964	0.820193	-0.0918975	0.369611	0.776678	0.117904	0.120871	0.991132	-0.202428	0.890699	0.968989	-0.0181205	0.473847	0.929067	0.0942417	0.257099	0.799044	0.148617	0.693745	0.95424	-0.0518939	0.471169	0.781856	-0.0948109
k__Bacteria; p__Proteobacteria; c__Deltaproteobacteria; o__Desulfovibrionales; f__Desulfovibrionaceae; g__Desulfovibrio; s__Desulfovibrio_desulfuricans	0.998779	0.998779	0.000189088	0.0633018	0.570844	-0.241266	0.56244	0.918045	-0.0762726	0.445487	0.991132	-0.10036	0.95392	0.983395	0.00762023	0.849163	0.969451	0.0250767	0.957428	0.997838	0.00703957	0.691916	0.95424	-0.0522201	0.119656	0.756594	-0.203079
k__Bacteria; p__Proteobacteria; c__Deltaproteobacteria; o__Desulfovibrionales; f__Desulfovibrionaceae; g__Desulfovibrio; s__Desulfovibrio_piger	0.908098	0.99498	0.0142626	0.213259	0.666652	-0.163036	0.975062	0.988416	-0.00412242	0.655196	0.997978	-0.0588377	0.531497	0.968989	0.0823757	0.591571	0.966487	0.0706696	0.0288723	0.441505	-0.282285	0.068145	0.754064	-0.237101	0.0214946	0.484419	-0.296355
k__Bacteria; p__Proteobacteria; c__Epsilonproteobacteria; o__Campylobacterales; f__Campylobacteraceae; g__Campylobacter; s__Campylobacter_concisus	NA	NA	NA	NA	NA	NA	NA	NA	NA	NA	NA	NA	NA	NA	NA	NA	NA	NA	NA	NA	NA	NA	NA	NA	NA	NA	NA
k__Bacteria; p__Proteobacteria; c__Epsilonproteobacteria; o__Campylobacterales; f__Campylobacteraceae; g__Campylobacter; s__Campylobacter_gracilis	NA	NA	NA	NA	NA	NA	NA	NA	NA	NA	NA	NA	NA	NA	NA	NA	NA	NA	NA	NA	NA	NA	NA	NA	NA	NA	NA
k__Bacteria; p__Proteobacteria; c__Epsilonproteobacteria; o__Campylobacterales; f__Campylobacteraceae; g__Campylobacter; s__Campylobacter_hominis	0.919083	0.99498	-0.0125517	0.110105	0.570844	0.208377	0.535699	0.918045	0.081537	0.198448	0.991132	0.168374	0.215855	0.968989	0.162128	0.139027	0.79889	0.193253	0.366946	0.857764	0.118557	0.665315	0.95424	0.0570004	0.244794	0.77311	0.152482
k__Bacteria; p__Proteobacteria; c__Epsilonproteobacteria; o__Campylobacterales; f__Campylobacteraceae; g__Campylobacter; s__Campylobacter_jejuni	0.939763	0.99498	-0.00933682	0.668155	0.933212	-0.0564865	0.358786	0.776678	-0.120576	0.585352	0.991132	0.0718551	0.667758	0.968989	0.0565584	0.977261	0.996228	0.00375886	0.710819	0.946958	-0.0488638	0.316364	0.914483	-0.131556	0.511261	0.795054	-0.0864621
k__Bacteria; p__Proteobacteria; c__Epsilonproteobacteria; o__Campylobacterales; f__Campylobacteraceae; g__Campylobacter; s__Campylobacter_ureolyticus	0.178875	0.770971	0.164951	0.315453	0.756676	0.131802	0.148319	0.776678	0.188902	0.260073	0.991132	0.147702	0.709951	0.968989	0.0490172	0.710811	0.966487	-0.0488651	0.753776	0.946958	0.0413463	0.627646	0.95424	0.0638988	0.954535	0.979416	-0.00751844
k__Bacteria; p__Proteobacteria; c__Gammaproteobacteria; o__Aeromonadales; f__Succinivibrionaceae; g__Succinatimonas; s__Succinatimonas_hippei	0.0231722	0.770971	-0.275113	0.216428	0.666652	0.161928	0.102232	0.776678	0.213017	0.0918841	0.991132	0.219557	0.111855	0.968989	0.207381	0.127003	0.79889	0.199219	0.176928	0.777499	-0.176661	0.44037	0.929231	-0.101486	0.407016	0.774195	0.109017
k__Bacteria; p__Proteobacteria; c__Gammaproteobacteria; o__Enterobacteriales; f__Enterobacteriaceae; g__Citrobacter; s__Citrobacter_freundii	NA	NA	NA	NA	NA	NA	NA	NA	NA	NA	NA	NA	NA	NA	NA	NA	NA	NA	NA	NA	NA	NA	NA	NA	NA	NA	NA
k__Bacteria; p__Proteobacteria; c__Gammaproteobacteria; o__Enterobacteriales; f__Enterobacteriaceae; g__Citrobacter; s__Citrobacter_koseri	0.705404	0.9943	0.0466841	0.406194	0.820193	-0.109207	0.783787	0.959167	0.0361727	0.301132	0.991132	0.135726	0.238244	0.968989	0.154593	0.176916	0.819774	0.176666	0.797489	0.959602	-0.0338288	0.977261	0.98866	0.00375875	0.954535	0.979416	-0.00751844
k__Bacteria; p__Proteobacteria; c__Gammaproteobacteria; o__Enterobacteriales; f__Enterobacteriaceae; g__Citrobacter; s__Citrobacter_unclassified	0.302458	0.837576	-0.126895	0.567566	0.886369	-0.0752771	0.188921	0.776678	-0.171959	0.792503	0.997978	-0.0346805	0.328784	0.968989	0.12825	0.446011	0.929067	0.100245	0.911526	0.986119	0.0146521	0.797826	0.95424	0.0337714	0.437054	0.774195	-0.10222
k__Bacteria; p__Proteobacteria; c__Gammaproteobacteria; o__Enterobacteriales; f__Enterobacteriaceae; g__Enterobacter; s__Enterobacter_aerogenes	NA	NA	NA	NA	NA	NA	NA	NA	NA	NA	NA	NA	NA	NA	NA	NA	NA	NA	NA	NA	NA	NA	NA	NA	NA	NA	NA
k__Bacteria; p__Proteobacteria; c__Gammaproteobacteria; o__Enterobacteriales; f__Enterobacteriaceae; g__Enterobacter; s__Enterobacter_cloacae	0.896477	0.99498	-0.0160756	0.0770398	0.570844	0.230031	0.212032	0.776678	-0.163468	0.853792	0.997978	0.0242983	0.499458	0.968989	0.0888833	0.666169	0.966487	-0.0568458	0.00790511	0.23168	0.339781	0.125939	0.810869	0.199768	0.573526	0.83127	0.074125
k__Bacteria; p__Proteobacteria; c__Gammaproteobacteria; o__Enterobacteriales; f__Enterobacteriaceae; g__Enterobacter; s__Enterobacter_sp_MGH_8	NA	NA	NA	NA	NA	NA	NA	NA	NA	NA	NA	NA	NA	NA	NA	NA	NA	NA	NA	NA	NA	NA	NA	NA	NA	NA	NA
k__Bacteria; p__Proteobacteria; c__Gammaproteobacteria; o__Enterobacteriales; f__Enterobacteriaceae; g__Enterobacteriaceae_noname; s__Enterobacteriaceae_bacterium_9_2_54FAA	NA	NA	NA	NA	NA	NA	NA	NA	NA	NA	NA	NA	NA	NA	NA	NA	NA	NA	NA	NA	NA	NA	NA	NA	NA	NA	NA
k__Bacteria; p__Proteobacteria; c__Gammaproteobacteria; o__Enterobacteriales; f__Enterobacteriaceae; g__Escherichia; s__Escherichia_albertii	NA	NA	NA	NA	NA	NA	NA	NA	NA	NA	NA	NA	NA	NA	NA	NA	NA	NA	NA	NA	NA	NA	NA	NA	NA	NA	NA
k__Bacteria; p__Proteobacteria; c__Gammaproteobacteria; o__Enterobacteriales; f__Enterobacteriaceae; g__Escherichia; s__Escherichia_coli	0.325044	0.855057	0.121151	0.45845	0.820193	0.0975379	0.353262	0.776678	-0.121958	0.407166	0.991132	-0.108983	0.330124	0.968989	-0.127899	0.463287	0.929067	-0.096496	0.251004	0.799044	0.150515	0.042687	0.754064	0.262566	0.8244	0.943894	-0.029255
k__Bacteria; p__Proteobacteria; c__Gammaproteobacteria; o__Enterobacteriales; f__Enterobacteriaceae; g__Escherichia; s__Escherichia_hermannii	0.162804	0.770971	0.171175	0.0995692	0.570844	0.214649	0.358786	0.776678	-0.120576	0.485359	0.991132	0.0918148	0.287727	0.968989	0.139511	0.886661	0.969451	-0.0187943	0.100217	0.684132	0.214249	0.113007	0.754064	0.206731	0.142248	0.756594	0.19172
k__Bacteria; p__Proteobacteria; c__Gammaproteobacteria; o__Enterobacteriales; f__Enterobacteriaceae; g__Escherichia; s__Escherichia_unclassified	0.646236	0.9943	-0.0566674	0.148648	0.578549	0.188751	0.669088	0.938589	-0.056318	0.558549	0.991132	-0.0770309	0.066115	0.968989	-0.238817	0.0154914	0.79889	-0.311251	0.105206	0.695724	0.211233	0.23933	0.914483	0.15424	0.52351	0.80268	0.0839791
k__Bacteria; p__Proteobacteria; c__Gammaproteobacteria; o__Enterobacteriales; f__Enterobacteriaceae; g__Hafnia; s__Hafnia_alvei	NA	NA	NA	NA	NA	NA	NA	NA	NA	NA	NA	NA	NA	NA	NA	NA	NA	NA	NA	NA	NA	NA	NA	NA	NA	NA	NA
k__Bacteria; p__Proteobacteria; c__Gammaproteobacteria; o__Enterobacteriales; f__Enterobacteriaceae; g__Klebsiella; s__Klebsiella_oxytoca	0.162804	0.770971	0.171175	0.355945	0.792077	0.121285	0.188921	0.776678	-0.171959	0.878183	0.997978	-0.0202105	0.149447	0.968989	0.188387	0.523929	0.940407	0.0838947	0.115401	0.703398	0.205398	0.0308612	0.754064	0.279016	0.449642	0.77839	0.0994504
k__Bacteria; p__Proteobacteria; c__Gammaproteobacteria; o__Enterobacteriales; f__Enterobacteriaceae; g__Klebsiella; s__Klebsiella_pneumoniae	0.101112	0.770971	-0.20051	0.0860615	0.570844	0.223494	0.14438	0.776678	0.190721	0.00496778	0.991132	0.358078	0.282449	0.968989	0.141032	0.62318	0.966487	0.0647278	0.272881	0.799044	0.143839	0.798234	0.95424	0.0337018	0.494083	0.787803	0.0899957
k__Bacteria; p__Proteobacteria; c__Gammaproteobacteria; o__Enterobacteriales; f__Enterobacteriaceae; g__Klebsiella; s__Klebsiella_sp_MS_92_3	NA	NA	NA	NA	NA	NA	NA	NA	NA	NA	NA	NA	NA	NA	NA	NA	NA	NA	NA	NA	NA	NA	NA	NA	NA	NA	NA
k__Bacteria; p__Proteobacteria; c__Gammaproteobacteria; o__Enterobacteriales; f__Enterobacteriaceae; g__Klebsiella; s__Klebsiella_unclassified	0.245851	0.834311	-0.142653	0.144655	0.570844	0.190592	0.312142	0.776678	0.132699	0.242673	0.991132	0.153161	0.147147	0.968989	0.189439	0.136142	0.79889	0.194648	0.386935	0.867209	-0.113725	0.584034	0.940187	-0.0721069	0.886037	0.956399	0.0188985
k__Bacteria; p__Proteobacteria; c__Gammaproteobacteria; o__Enterobacteriales; f__Enterobacteriaceae; g__Klebsiella; s__Klebsiella_variicola	NA	NA	NA	NA	NA	NA	NA	NA	NA	NA	NA	NA	NA	NA	NA	NA	NA	NA	NA	NA	NA	NA	NA	NA	NA	NA	NA
k__Bacteria; p__Proteobacteria; c__Gammaproteobacteria; o__Enterobacteriales; f__Enterobacteriaceae; g__Morganella; s__Morganella_morganii	0.162804	0.770971	0.171175	0.0995692	0.570844	0.214649	0.358786	0.776678	-0.120576	0.485359	0.991132	0.0918148	0.287727	0.968989	0.139511	0.886661	0.969451	-0.0187943	0.100217	0.684132	0.214249	0.113007	0.754064	0.206731	0.142248	0.756594	0.19172
k__Bacteria; p__Proteobacteria; c__Gammaproteobacteria; o__Enterobacteriales; f__Enterobacteriaceae; g__Pantoea; s__Pantoea_agglomerans	NA	NA	NA	NA	NA	NA	NA	NA	NA	NA	NA	NA	NA	NA	NA	NA	NA	NA	NA	NA	NA	NA	NA	NA	NA	NA	NA
k__Bacteria; p__Proteobacteria; c__Gammaproteobacteria; o__Enterobacteriales; f__Enterobacteriaceae; g__Pantoea; s__Pantoea_unclassified	NA	NA	NA	NA	NA	NA	NA	NA	NA	NA	NA	NA	NA	NA	NA	NA	NA	NA	NA	NA	NA	NA	NA	NA	NA	NA	NA
k__Bacteria; p__Proteobacteria; c__Gammaproteobacteria; o__Enterobacteriales; f__Enterobacteriaceae; g__Proteus; s__Proteus_mirabilis	NA	NA	NA	NA	NA	NA	NA	NA	NA	NA	NA	NA	NA	NA	NA	NA	NA	NA	NA	NA	NA	NA	NA	NA	NA	NA	NA
k__Bacteria; p__Proteobacteria; c__Gammaproteobacteria; o__Enterobacteriales; f__Enterobacteriaceae; g__Rahnella; s__Rahnella_aquatilis	NA	NA	NA	NA	NA	NA	NA	NA	NA	NA	NA	NA	NA	NA	NA	NA	NA	NA	NA	NA	NA	NA	NA	NA	NA	NA	NA
k__Bacteria; p__Proteobacteria; c__Gammaproteobacteria; o__Enterobacteriales; f__Enterobacteriaceae; g__Rahnella; s__Rahnella_unclassified	0.233936	0.834311	-0.146277	0.886454	0.988368	0.0188288	0.902964	0.959167	0.0160767	1	1	0	0.157592	0.968989	-0.184757	0.797484	0.969451	0.0338297	0.475134	0.90305	0.0939688	0.375289	0.92437	0.116521	0.753747	0.92282	-0.0413514
k__Bacteria; p__Proteobacteria; c__Gammaproteobacteria; o__Enterobacteriales; f__Enterobacteriaceae; g__Raoultella; s__Raoultella_ornithinolytica	0.763782	0.9943	-0.0371188	0.134973	0.570844	0.195219	0.188921	0.776678	-0.171959	0.878183	0.997978	-0.0202105	0.790386	0.968989	0.0350425	0.686654	0.966487	-0.0531601	0.522611	0.926561	0.0841604	0.633061	0.95424	0.062897	0.908829	0.958449	0.0151007
k__Bacteria; p__Proteobacteria; c__Gammaproteobacteria; o__Enterobacteriales; f__Enterobacteriaceae; g__Shigella; s__Shigella_flexneri	NA	NA	NA	NA	NA	NA	NA	NA	NA	NA	NA	NA	NA	NA	NA	NA	NA	NA	NA	NA	NA	NA	NA	NA	NA	NA	NA
k__Bacteria; p__Proteobacteria; c__Gammaproteobacteria; o__Enterobacteriales; f__Enterobacteriaceae; g__Shigella; s__Shigella_sonnei	0.340734	0.85943	0.117309	0.753331	0.95557	-0.0414235	0.902964	0.959167	0.0160767	0.346178	0.991132	-0.12375	0.586475	0.968989	0.0716406	0.668729	0.966487	0.0563829	0.239735	0.799044	0.154109	0.511314	0.929231	0.0864513	0.710784	0.901507	0.0488699
k__Bacteria; p__Proteobacteria; c__Gammaproteobacteria; o__Pasteurellales; f__Pasteurellaceae; g__Aggregatibacter; s__Aggregatibacter_aphrophilus	NA	NA	NA	NA	NA	NA	NA	NA	NA	NA	NA	NA	NA	NA	NA	NA	NA	NA	NA	NA	NA	NA	NA	NA	NA	NA	NA
k__Bacteria; p__Proteobacteria; c__Gammaproteobacteria; o__Pasteurellales; f__Pasteurellaceae; g__Aggregatibacter; s__Aggregatibacter_segnis	0.702628	0.9943	-0.0471454	NA	NA	NA	NA	NA	NA	NA	NA	NA	NA	NA	NA	NA	NA	NA	NA	NA	NA	NA	NA	NA	NA	NA	NA
k__Bacteria; p__Proteobacteria; c__Gammaproteobacteria; o__Pasteurellales; f__Pasteurellaceae; g__Aggregatibacter; s__Aggregatibacter_unclassified	NA	NA	NA	NA	NA	NA	NA	NA	NA	NA	NA	NA	NA	NA	NA	NA	NA	NA	NA	NA	NA	NA	NA	NA	NA	NA	NA
k__Bacteria; p__Proteobacteria; c__Gammaproteobacteria; o__Pasteurellales; f__Pasteurellaceae; g__Haemophilus; s__Haemophilus_haemolyticus	NA	NA	NA	NA	NA	NA	NA	NA	NA	NA	NA	NA	NA	NA	NA	NA	NA	NA	NA	NA	NA	NA	NA	NA	NA	NA	NA
k__Bacteria; p__Proteobacteria; c__Gammaproteobacteria; o__Pasteurellales; f__Pasteurellaceae; g__Haemophilus; s__Haemophilus_parainfluenzae	0.988723	0.997861	0.00174642	0.799125	0.975522	-0.0335498	0.320095	0.776678	0.130555	0.598693	0.997978	0.069319	0.390093	0.968989	0.112975	0.310078	0.844179	0.133261	0.996497	0.997838	0.00057903	0.0855365	0.754064	-0.22386	0.698533	0.899515	0.0510415
k__Bacteria; p__Proteobacteria; c__Gammaproteobacteria; o__Pasteurellales; f__Pasteurellaceae; g__Haemophilus; s__Haemophilus_pittmaniae	0.939763	0.99498	-0.00933682	0.668155	0.933212	-0.0564865	0.358786	0.776678	-0.120576	0.585352	0.991132	0.0718551	0.667758	0.968989	0.0565584	0.977261	0.996228	0.00375886	0.710819	0.946958	-0.0488638	0.316364	0.914483	-0.131556	0.511261	0.795054	-0.0864621
k__Bacteria; p__Proteobacteria; c__Gammaproteobacteria; o__Pasteurellales; f__Pasteurellaceae; g__Haemophilus; s__Haemophilus_sputorum	NA	NA	NA	NA	NA	NA	NA	NA	NA	NA	NA	NA	NA	NA	NA	NA	NA	NA	NA	NA	NA	NA	NA	NA	NA	NA	NA
k__Bacteria; p__Proteobacteria; c__Gammaproteobacteria; o__Pseudomonadales; f__Moraxellaceae; g__Acinetobacter; s__Acinetobacter_junii	NA	NA	NA	NA	NA	NA	NA	NA	NA	NA	NA	NA	NA	NA	NA	NA	NA	NA	NA	NA	NA	NA	NA	NA	NA	NA	NA
k__Bacteria; p__Proteobacteria; c__Gammaproteobacteria; o__Pseudomonadales; f__Moraxellaceae; g__Acinetobacter; s__Acinetobacter_unclassified	NA	NA	NA	NA	NA	NA	NA	NA	NA	NA	NA	NA	NA	NA	NA	NA	NA	NA	NA	NA	NA	NA	NA	NA	NA	NA	NA
k__Bacteria; p__Proteobacteria; c__Gammaproteobacteria; o__Pseudomonadales; f__Pseudomonadaceae; g__Pseudomonas; s__Pseudomonas_aeruginosa	0.0102198	0.694558	0.309502	0.494703	0.825254	-0.0898671	0.188921	0.776678	-0.171959	0.177364	0.991132	-0.176486	0.274983	0.968989	-0.143217	0.0757096	0.79889	-0.231046	0.250351	0.799044	-0.15072	0.723459	0.95424	0.0466367	0.400306	0.774195	-0.110575
k__Bacteria; p__Proteobacteria; c__Gammaproteobacteria; o__Pseudomonadales; f__Pseudomonadaceae; g__Pseudomonas; s__Pseudomonas_unclassified	0.0259128	0.770971	0.270092	0.0995692	0.570844	0.214649	0.358786	0.776678	-0.120576	0.485359	0.991132	0.0918148	0.287727	0.968989	0.139511	0.886661	0.969451	-0.0187943	0.100217	0.684132	0.214249	0.113007	0.754064	0.206731	0.142248	0.756594	0.19172
k__Bacteria; p__Spirochaetes; c__Spirochaetia; o__Spirochaetales; f__Spirochaetaceae; g__Treponema; s__Treponema_maltophilum	NA	NA	NA	NA	NA	NA	NA	NA	NA	NA	NA	NA	NA	NA	NA	NA	NA	NA	NA	NA	NA	NA	NA	NA	NA	NA	NA
k__Bacteria; p__Spirochaetes; c__Spirochaetia; o__Spirochaetales; f__Spirochaetaceae; g__Treponema; s__Treponema_socranskii	NA	NA	NA	NA	NA	NA	NA	NA	NA	NA	NA	NA	NA	NA	NA	NA	NA	NA	NA	NA	NA	NA	NA	NA	NA	NA	NA
k__Bacteria; p__Synergistetes; c__Synergistia; o__Synergistales; f__Synergistaceae; g__Fretibacterium; s__Fretibacterium_fastidiosum	NA	NA	NA	NA	NA	NA	NA	NA	NA	NA	NA	NA	NA	NA	NA	NA	NA	NA	NA	NA	NA	NA	NA	NA	NA	NA	NA
k__Bacteria; p__Synergistetes; c__Synergistia; o__Synergistales; f__Synergistaceae; g__Pyramidobacter; s__Pyramidobacter_piscolens	NA	NA	NA	NA	NA	NA	NA	NA	NA	NA	NA	NA	NA	NA	NA	NA	NA	NA	NA	NA	NA	NA	NA	NA	NA	NA	NA
k__Bacteria; p__Synergistetes; c__Synergistia; o__Synergistales; f__Synergistaceae; g__Synergistes; s__Synergistes_sp_3_1_syn1	0.0879236	0.770971	0.208522	NA	NA	NA	NA	NA	NA	NA	NA	NA	NA	NA	NA	NA	NA	NA	NA	NA	NA	NA	NA	NA	NA	NA	NA
k__Bacteria; p__Tenericutes; c__Mollicutes; o__Mycoplasmatales; f__Mycoplasmataceae; g__Mycoplasma; s__Mycoplasma_hominis	NA	NA	NA	NA	NA	NA	NA	NA	NA	NA	NA	NA	NA	NA	NA	NA	NA	NA	NA	NA	NA	NA	NA	NA	NA	NA	NA
k__Bacteria; p__Tenericutes; c__Mollicutes; o__Mycoplasmatales; f__Mycoplasmataceae; g__Ureaplasma; s__Ureaplasma_unclassified	NA	NA	NA	NA	NA	NA	NA	NA	NA	NA	NA	NA	NA	NA	NA	NA	NA	NA	NA	NA	NA	NA	NA	NA	NA	NA	NA
k__Bacteria; p__Tenericutes; c__Mollicutes; o__Mycoplasmatales; f__Mycoplasmataceae; g__Ureaplasma; s__Ureaplasma_urealyticum	NA	NA	NA	NA	NA	NA	NA	NA	NA	NA	NA	NA	NA	NA	NA	NA	NA	NA	NA	NA	NA	NA	NA	NA	NA	NA	NA
k__Bacteria; p__Verrucomicrobia; c__Verrucomicrobiae; o__Verrucomicrobiales; f__Verrucomicrobiaceae; g__Akkermansia; s__Akkermansia_muciniphila	0.662938	0.9943	-0.0538153	0.741434	0.95557	-0.0434917	0.502678	0.89861	0.0882198	0.5582	0.991132	0.0770991	0.0470115	0.968989	0.257492	0.0792253	0.79889	0.228394	0.434524	0.878347	-0.102782	0.708082	0.95424	-0.0493478	0.553584	0.813302	-0.0780024

## Sheet: Table S6
Taxonomy	log mean	association class	LDA score	p value	mean non-COVID-19 (%)	mean COVID no antibiotics (%)	mean COVID with antibiotics (%)
k__Bacteria; p__Actinobacteria; c__Actinobacteria; o__Bifidobacteriales; f__Bifidobacteriaceae; g__Bifidobacterium; s__Bifidobacterium_dentium	4.37823	COVID	4.12083	0.00160601	0.0254223	0.415548	3.27348
k__Bacteria; p__Firmicutes; c__Bacilli; o__Lactobacillales; f__Lactobacillaceae; g__Lactobacillus; s__Lactobacillus_ruminis	4.31259	COVID	4.02743	0.000217429	0	0.933715	2.55512
k__Bacteria; p__Bacteroidetes; c__Bacteroidia; o__Bacteroidales; f__Porphyromonadaceae; g__Parabacteroides; s__Parabacteroides_distasonis	4.27744	COVID	3.97951	0.000217739	0.172927	0.512793	2.51266
k__Bacteria; p__Firmicutes; c__Bacilli; o__Lactobacillales; f__Enterococcaceae; g__Enterococcus; s__Enterococcus_faecalis	4.34254	COVID	3.96533	0.00656022	0.205377	0.000305385	3.18673
k__Bacteria; p__Bacteroidetes; c__Bacteroidia; o__Bacteroidales; f__Porphyromonadaceae; g__Parabacteroides; s__Parabacteroides_unclassified	4.21305	COVID	3.92846	0.00872959	0.108324	0.24727	2.25445
k__Bacteria; p__Actinobacteria; c__Actinobacteria; o__Actinomycetales; f__Propionibacteriaceae; g__Propionibacterium; s__Propionibacterium_acnes	0.0970382	COVID	3.86733	0.0173009	0	0	0.000181035
k__Bacteria; p__Actinobacteria; c__Actinobacteria; o__Coriobacteriales; f__Coriobacteriaceae; g__Atopobium; s__Atopobium_minutum	0.615301	COVID	3.77118	0.0173009	0	4.53846e-05	0.000576897
k__Bacteria; p__Firmicutes; c__Clostridia; o__Clostridiales; f__Clostridiaceae; g__Clostridium; s__Clostridium_bolteae	4.08434	COVID	3.75815	0.000162288	0.077209	0.159062	1.68729
k__Bacteria; p__Firmicutes; c__Clostridia; o__Clostridiales; f__Clostridiaceae; g__Clostridium; s__Clostridium_symbiosum	3.92647	COVID	3.67148	0.0204983	0.0227367	0.145909	1.15729
k__Bacteria; p__Firmicutes; c__Negativicutes; o__Selenomonadales; f__Veillonellaceae; g__Veillonella; s__Veillonella_parvula	3.93611	COVID	3.64736	0.0108541	0.0128492	0.0173161	1.2423
k__Bacteria; p__Firmicutes; c__Bacilli; o__Bacillales; f__Staphylococcaceae; g__Staphylococcus; s__Staphylococcus_aureus	0.660324	COVID	3.63708	0.0173009	0	0.00109154	0.000172414
k__Bacteria; p__Firmicutes; c__Erysipelotrichia; o__Erysipelotrichales; f__Erysipelotrichaceae; g__Coprobacillus; s__Coprobacillus_sp_29_1	3.57478	COVID	3.36488	0.0105642	0.0106797	0.960402	0.113513
k__Bacteria; p__Proteobacteria; c__Betaproteobacteria; o__Burkholderiales; f__Sutterellaceae; g__Sutterella; s__Sutterella_wadsworthensis	3.59681	COVID	3.25979	0.00217135	0.02902	0.208365	0.478584
k__Bacteria; p__Firmicutes; c__Clostridia; o__Clostridiales; f__Clostridiaceae; g__Clostridium; s__Clostridium_hathewayi	3.59487	COVID	3.16578	0.00211604	0.0922435	0.158812	0.498515
k__Bacteria; p__Firmicutes; c__Clostridia; o__Clostridiales; f__Clostridiaceae; g__Clostridium; s__Clostridium_clostridioforme	3.39286	COVID	3.12315	0.00206582	0.0119365	0.0637385	0.329269
k__Bacteria; p__Bacteroidetes; c__Bacteroidia; o__Bacteroidales; f__Prevotellaceae; g__Prevotella; s__Prevotella_disiens	1.55537	COVID	3.11933	0.011968	0.000251154	0.00136385	0.00458965
k__Bacteria; p__Proteobacteria; c__Gammaproteobacteria; o__Enterobacteriales; f__Enterobacteriaceae; g__Morganella; s__Morganella_morganii	3.34703	COVID	3.11397	0.0294679	7.89744e-05	0	0.322012
k__Bacteria; p__Firmicutes; c__Bacilli; o__Lactobacillales; f__Lactobacillaceae; g__Lactobacillus; s__Lactobacillus_rhamnosus	1.41501	COVID	2.99266	0.0332134	0.000628205	0.000482308	0.00354931
k__Bacteria; p__Actinobacteria; c__Actinobacteria; o__Coriobacteriales; f__Coriobacteriaceae; g__Cryptobacterium; s__Cryptobacterium_curtum	1.66386	COVID	2.95632	0.0306739	4.79487e-05	0	0.00667897
k__Bacteria; p__Actinobacteria; c__Actinobacteria; o__Bifidobacteriales; f__Bifidobacteriaceae; g__Bifidobacterium; s__Bifidobacterium_animalis	2.62716	COVID	2.892	0.0173009	0	0	0.0613759
k__Bacteria; p__Firmicutes; c__Clostridia; o__Clostridiales; f__Clostridiaceae; g__Clostridium; s__Clostridium_butyricum	2.70497	COVID	2.81555	0.0173009	0	0	0.0734114
k__Bacteria; p__Firmicutes; c__Erysipelotrichia; o__Erysipelotrichales; f__Erysipelotrichaceae; g__Erysipelotrichaceae_noname; s__Clostridium_ramosum	2.95838	COVID	2.73376	0.000465281	0.00891744	0.01494	0.124652
k__Bacteria; p__Firmicutes; c__Bacilli; o__Lactobacillales; f__Lactobacillaceae; g__Lactobacillus; s__Lactobacillus_fermentum	2.88811	COVID	2.72734	0.0194562	0.00112808	0.0221015	0.102017
k__Bacteria; p__Firmicutes; c__Clostridia; o__Clostridiales; f__Clostridiales_noname; g__Flavonifractor; s__Flavonifractor_plautii	2.94942	COVID	2.54491	0.00227285	0.0224441	0.0555954	0.103963
k__Bacteria; p__Firmicutes; c__Bacilli; o__Lactobacillales; f__Leuconostocaceae; g__Weissella; s__Weissella_confusa	2.81253	COVID	2.53053	0.0168296	0.00722064	0	0.0940035
k__Bacteria; p__Firmicutes; c__Clostridia; o__Clostridiales; f__Lachnospiraceae; g__Stomatobaculum; s__Stomatobaculum_longum	1.78023	COVID	2.50161	0.005779	0	0.000199231	0.00863897
k__Bacteria; p__Firmicutes; c__Erysipelotrichia; o__Erysipelotrichales; f__Erysipelotrichaceae; g__Erysipelotrichaceae_noname; s__Clostridium_innocuum	2.49124	COVID	2.44469	0.0124995	0.00712821	0.00439923	0.0429072
k__Bacteria; p__Firmicutes; c__Negativicutes; o__Selenomonadales; f__Veillonellaceae; g__Megasphaera; s__Megasphaera_micronuciformis	2.68344	COVID	2.44366	0.0135665	0.00201782	0	0.0697534
k__Bacteria; p__Firmicutes; c__Clostridia; o__Clostridiales; f__Clostridiaceae; g__Clostridium; s__Clostridium_asparagiforme	2.59127	COVID	2.42211	0.0014984	0.0136531	0.0123169	0.0509734
k__Bacteria; p__Firmicutes; c__Clostridia; o__Clostridiales; f__Clostridiales_noname; g__Clostridiales_noname; s__Clostridiales_bacterium_1_7_47FAA	2.57137	COVID	2.35308	0.00602393	0.00754346	0.0111569	0.0489679
k__Bacteria; p__Firmicutes; c__Bacilli; o__Lactobacillales; f__Streptococcaceae; g__Streptococcus; s__Streptococcus_mitis_oralis_pneumoniae	2.69648	COVID	2.35065	0.0171015	0.0222735	0.0121223	0.0665359
k__Bacteria; p__Firmicutes; c__Clostridia; o__Clostridiales; f__Clostridiales_Family_XI_Incertae_Sedis; g__Finegoldia; s__Finegoldia_magna	2.40516	COVID	2.30335	0.000918365	0.000175641	0.00215	0.0358417
k__Bacteria; p__Firmicutes; c__Bacilli; o__Lactobacillales; f__Lactobacillaceae; g__Lactobacillus; s__Lactobacillus_mucosae	2.49342	COVID	2.20381	0.0124714	0.0140769	0	0.0450621
k__Bacteria; p__Firmicutes; c__Clostridia; o__Clostridiales; f__Eubacteriaceae; g__Eubacterium; s__Eubacterium_rectale	4.83168	non-COVID	4.39059	1.51331e-08	6.78317	4.72696	0.188341
k__Bacteria; p__Firmicutes; c__Clostridia; o__Clostridiales; f__Ruminococcaceae; g__Ruminococcus; s__Ruminococcus_bromii	4.75801	non-COVID	4.35746	2.48189e-05	5.72658	2.65577	0.254978
k__Bacteria; p__Firmicutes; c__Clostridia; o__Clostridiales; f__Ruminococcaceae; g__Faecalibacterium; s__Faecalibacterium_prausnitzii	4.77067	non-COVID	4.26056	2.0268e-07	5.89453	4.71419	1.12456
k__Bacteria; p__Actinobacteria; c__Actinobacteria; o__Bifidobacteriales; f__Bifidobacteriaceae; g__Bifidobacterium; s__Bifidobacterium_pseudocatenulatum	4.58311	non-COVID	4.24736	2.48988e-06	3.82796	0.768481	0.109415
k__Bacteria; p__Firmicutes; c__Clostridia; o__Clostridiales; f__Ruminococcaceae; g__Subdoligranulum; s__Subdoligranulum_unclassified	4.6908	non-COVID	4.23596	1.85284e-07	4.90492	1.77823	1.09416
k__Bacteria; p__Actinobacteria; c__Actinobacteria; o__Coriobacteriales; f__Coriobacteriaceae; g__Collinsella; s__Collinsella_aerofaciens	4.65285	non-COVID	4.21834	8.18532e-06	4.49499	2.90029	0.608389
k__Bacteria; p__Actinobacteria; c__Actinobacteria; o__Bifidobacteriales; f__Bifidobacteriaceae; g__Bifidobacterium; s__Bifidobacterium_longum	4.76538	non-COVID	4.20247	0.00197613	5.82445	5.59905	2.0074
k__Bacteria; p__Firmicutes; c__Clostridia; o__Clostridiales; f__Ruminococcaceae; g__Ruminococcus; s__Ruminococcus_sp_5_1_39BFAA	4.59159	non-COVID	3.99794	3.82483e-05	3.90298	5.40055	0.625699
k__Bacteria; p__Firmicutes; c__Clostridia; o__Clostridiales; f__Lachnospiraceae; g__Blautia; s__Ruminococcus_obeum	4.37975	non-COVID	3.84593	3.52092e-05	2.39657	1.48054	0.997067
k__Bacteria; p__Bacteroidetes; c__Bacteroidia; o__Bacteroidales; f__Prevotellaceae; g__Prevotella; s__Prevotella_copri	4.29907	non-COVID	3.77262	0.0476503	1.98597	3.47768	0.0119386
k__Bacteria; p__Firmicutes; c__Clostridia; o__Clostridiales; f__Lachnospiraceae; g__Coprococcus; s__Coprococcus_comes	4.13541	non-COVID	3.69281	9.38935e-08	1.36521	0.801338	0.128188
k__Bacteria; p__Firmicutes; c__Clostridia; o__Clostridiales; f__Lachnospiraceae; g__Dorea; s__Dorea_formicigenerans	4.1855	non-COVID	3.68527	1.09832e-07	1.53192	1.18619	0.232766
k__Bacteria; p__Firmicutes; c__Clostridia; o__Clostridiales; f__Lachnospiraceae; g__Dorea; s__Dorea_longicatena	4.1769	non-COVID	3.64316	7.1751e-06	1.50229	1.79055	0.144343
k__Bacteria; p__Firmicutes; c__Clostridia; o__Clostridiales; f__Lachnospiraceae; g__Coprococcus; s__Coprococcus_sp_ART55_1	3.96353	non-COVID	3.63621	0.0255224	0.919311	0.0111138	0
k__Bacteria; p__Actinobacteria; c__Actinobacteria; o__Coriobacteriales; f__Coriobacteriaceae; g__Adlercreutzia; s__Adlercreutzia_equolifaciens	3.90947	non-COVID	3.5927	8.34117e-10	0.811514	0.112545	0.0204138
k__Bacteria; p__Firmicutes; c__Clostridia; o__Clostridiales; f__Ruminococcaceae; g__Ruminococcus; s__Ruminococcus_lactaris	3.93413	non-COVID	3.59059	9.05385e-06	0.858357	0.234174	0
k__Bacteria; p__Bacteroidetes; c__Bacteroidia; o__Bacteroidales; f__Rikenellaceae; g__Alistipes; s__Alistipes_putredinis	4.07545	non-COVID	3.58386	0.00152911	1.18929	0.974315	0.179441
k__Bacteria; p__Firmicutes; c__Bacilli; o__Bacillales; f__Bacillales_noname; g__Gemella; s__Gemella_unclassified	0.955578	non-COVID	3.3934	0.00258303	0.000902308	0	0.000184828
k__Bacteria; p__Firmicutes; c__Bacilli; o__Lactobacillales; f__Streptococcaceae; g__Streptococcus; s__Streptococcus_salivarius	4.10269	non-COVID	3.39169	0.000300687	1.26606	2.52501	0.450909
k__Bacteria; p__Firmicutes; c__Clostridia; o__Clostridiales; f__Clostridiaceae; g__Clostridium; s__Clostridium_leptum	3.6826	non-COVID	3.32407	1.62516e-07	0.481461	0.0379362	0.0242538
k__Bacteria; p__Firmicutes; c__Negativicutes; o__Selenomonadales; f__Veillonellaceae; g__Megasphaera; s__Megasphaera_unclassified	3.73936	non-COVID	3.29419	0.0350704	0.548377	0.584887	0.0164959
k__Bacteria; p__Firmicutes; c__Negativicutes; o__Selenomonadales; f__Acidaminococcaceae; g__Phascolarctobacterium; s__Phascolarctobacterium_succinatutens	3.53922	non-COVID	3.2404	0.0244234	0.345295	0.00930385	0.000948276
k__Bacteria; p__Firmicutes; c__Clostridia; o__Clostridiales; f__Lachnospiraceae; g__Lachnospiraceae_noname; s__Lachnospiraceae_bacterium_1_1_57FAA	3.78408	non-COVID	3.23989	5.78058e-05	0.608054	0.449827	0.176251
k__Bacteria; p__Firmicutes; c__Clostridia; o__Clostridiales; f__Eubacteriaceae; g__Eubacterium; s__Eubacterium_hallii	4.03259	non-COVID	3.23542	4.43678e-07	1.07739	1.76709	0.228631
k__Bacteria; p__Firmicutes; c__Erysipelotrichia; o__Erysipelotrichales; f__Erysipelotrichaceae; g__Erysipelotrichaceae_noname; s__Eubacterium_biforme	3.58899	non-COVID	3.18287	0.0293979	0.38793	0.267858	0.0395076
k__Bacteria; p__Firmicutes; c__Clostridia; o__Clostridiales; f__Eubacteriaceae; g__Eubacterium; s__Eubacterium_saphenum	1.25298	non-COVID	3.16752	0.0111155	0.00179039	0	0
k__Bacteria; p__Firmicutes; c__Clostridia; o__Clostridiales; f__Lachnospiraceae; g__Roseburia; s__Roseburia_intestinalis	3.62753	non-COVID	3.15484	0.00054905	0.424068	0.297797	0.00928724
k__Bacteria; p__Bacteroidetes; c__Bacteroidia; o__Bacteroidales; f__Bacteroidaceae; g__Bacteroides; s__Bacteroides_eggerthii	3.66392	non-COVID	3.10604	0.00613977	0.461203	0.0296415	0.219213
k__Bacteria; p__Firmicutes; c__Clostridia; o__Clostridiales; f__Eubacteriaceae; g__Eubacterium; s__Eubacterium_ventriosum	3.53254	non-COVID	3.09338	1.75367e-06	0.340528	0.197055	0.0425159
k__Bacteria; p__Firmicutes; c__Clostridia; o__Clostridiales; f__Ruminococcaceae; g__Subdoligranulum; s__Subdoligranulum_sp_4_3_54A2FAA	3.34098	non-COVID	3.04467	0.00925942	0.219152	0.0631123	0
k__Bacteria; p__Firmicutes; c__Clostridia; o__Clostridiales; f__Lachnospiraceae; g__Roseburia; s__Roseburia_hominis	3.48408	non-COVID	3.04093	9.52832e-08	0.304712	0.0727723	0.0843655
k__Bacteria; p__Actinobacteria; c__Actinobacteria; o__Actinomycetales; f__Actinomycetaceae; g__Actinomyces; s__Actinomyces_cardiffensis	1.30949	non-COVID	2.97077	0.00536757	0.00203885	0	0
k__Bacteria; p__Firmicutes; c__Clostridia; o__Clostridiales; f__Eubacteriaceae; g__Eubacterium; s__Eubacterium_ramulus	3.3851	non-COVID	2.89052	3.97165e-06	0.242591	0.25578	0.00732897
k__Bacteria; p__Actinobacteria; c__Actinobacteria; o__Actinomycetales; f__Actinomycetaceae; g__Actinomyces; s__Actinomyces_massiliensis	1.66328	non-COVID	2.87684	0.0366666	0.00460449	0.01024	0.000887241
k__Bacteria; p__Bacteroidetes; c__Bacteroidia; o__Bacteroidales; f__Porphyromonadaceae; g__Barnesiella; s__Barnesiella_intestinihominis	3.34947	non-COVID	2.85486	0.0213979	0.223519	0.244267	0.0172135
k__Bacteria; p__Candidatus_Saccharibacteria; c__Candidatus_Saccharibacteria_noname; o__Candidatus_Saccharibacteria_noname; f__Candidatus_Saccharibacteria_noname; g__Candidatus_Saccharibacteria_noname; s__candidate_division_TM7_single_cell_isolate_TM7c	1.36269	non-COVID	2.76778	0.000813975	0.00230474	0	0
k__Bacteria; p__Firmicutes; c__Clostridia; o__Clostridiales; f__Ruminococcaceae; g__Ruminococcus; s__Ruminococcus_callidus	3.09832	non-COVID	2.72116	5.42569e-06	0.125381	0.253787	0
k__Bacteria; p__Firmicutes; c__Clostridia; o__Clostridiales; f__Lachnospiraceae; g__Lachnospiraceae_noname; s__Lachnospiraceae_bacterium_5_1_63FAA	3.44371	non-COVID	2.70298	0.000422654	0.277694	0.600501	0.047509
k__Bacteria; p__Firmicutes; c__Clostridia; o__Clostridiales; f__Lachnospiraceae; g__Coprococcus; s__Coprococcus_catus	3.5283	non-COVID	2.67505	0.00100434	0.337315	0.287526	0.181413
k__Bacteria; p__Firmicutes; c__Bacilli; o__Bacillales; f__Bacillales_noname; g__Gemella; s__Gemella_sanguinis	2.08448	non-COVID	2.66021	0.0491196	0.0121441	0.0238531	0.00356241
k__Bacteria; p__Bacteroidetes; c__Bacteroidia; o__Bacteroidales; f__Porphyromonadaceae; g__Parabacteroides; s__Parabacteroides_goldsteinii	2.8988	non-COVID	2.64952	0.0111605	0.0791805	0.000796923	0.0110628
k__Bacteria; p__Firmicutes; c__Bacilli; o__Lactobacillales; f__Streptococcaceae; g__Streptococcus; s__Streptococcus_cristatus	1.64436	non-COVID	2.64469	0.0143082	0.00440821	0.00182615	0.000538276
k__Bacteria; p__Firmicutes; c__Negativicutes; o__Selenomonadales; f__Veillonellaceae; g__Megamonas; s__Megamonas_rupellensis	2.91584	non-COVID	2.63989	0.00549116	0.082323	0.0275392	0
k__Bacteria; p__Actinobacteria; c__Actinobacteria; o__Coriobacteriales; f__Coriobacteriaceae; g__Gordonibacter; s__Gordonibacter_pamelaeae	3.12675	non-COVID	2.63162	0.00346354	0.133676	0.0975931	0.0288169
k__Bacteria; p__Firmicutes; c__Clostridia; o__Clostridiales; f__Peptostreptococcaceae; g__Peptostreptococcaceae_noname; s__Peptostreptococcaceae_noname_unclassified	2.9761	non-COVID	2.58972	0.00371322	0.0946313	0.0915061	0.00730828
k__Bacteria; p__Bacteroidetes; c__Bacteroidia; o__Bacteroidales; f__Rikenellaceae; g__Alistipes; s__Alistipes_shahii	3.25092	non-COVID	2.57467	0.0181711	0.178098	0.202684	0.121928
k__Bacteria; p__Bacteroidetes; c__Bacteroidia; o__Bacteroidales; f__Bacteroidales_noname; g__Bacteroidales_noname; s__Bacteroidales_bacterium_ph8	3.00911	non-COVID	2.56906	0.00872139	0.102078	0.0795846	0.0105345
k__Bacteria; p__Firmicutes; c__Bacilli; o__Lactobacillales; f__Streptococcaceae; g__Lactococcus; s__Lactococcus_garvieae	2.86965	non-COVID	2.56656	0.00344886	0.0740577	0.0237108	0.00536
k__Bacteria; p__Firmicutes; c__Clostridia; o__Clostridiales; f__Clostridiales_Family_XIII_Incertae_Sedis; g__Clostridiales_Family_XIII_Incertae_Sedis_noname; s__Eubacterium_infirmum	1.25819	non-COVID	2.54917	0.0217489	0.00181115	0.000288462	0
k__Bacteria; p__Proteobacteria; c__Deltaproteobacteria; o__Desulfovibrionales; f__Desulfovibrionaceae; g__Bilophila; s__Bilophila_wadsworthia	2.24163	non-COVID	2.52042	0.0036686	0.0174231	0.0117046	0.0102445
k__Bacteria; p__Firmicutes; c__Erysipelotrichia; o__Erysipelotrichales; f__Erysipelotrichaceae; g__Holdemania; s__Holdemania_filiformis	2.35051	non-COVID	2.48245	3.29196e-05	0.0224064	0.00663846	0.0036969
k__Bacteria; p__Bacteroidetes; c__Bacteroidia; o__Bacteroidales; f__Rikenellaceae; g__Alistipes; s__Alistipes_indistinctus	3.06168	non-COVID	2.47441	0.0256316	0.11522	0.0653208	0.0927838
k__Bacteria; p__Firmicutes; c__Bacilli; o__Lactobacillales; f__Streptococcaceae; g__Streptococcus; s__Streptococcus_australis	2.94974	non-COVID	2.47015	0.00187799	0.0890321	0.0656492	0.0341472
k__Bacteria; p__Actinobacteria; c__Actinobacteria; o__Bifidobacteriales; f__Bifidobacteriaceae; g__Bifidobacterium; s__Bifidobacterium_catenulatum	2.71885	non-COVID	2.46442	0.00529423	0.0523365	0.0146654	0
k__Bacteria; p__Firmicutes; c__Erysipelotrichia; o__Erysipelotrichales; f__Erysipelotrichaceae; g__Erysipelotrichaceae_noname; s__Eubacterium_cylindroides	2.72689	non-COVID	2.44525	0.0390122	0.0533051	0.000206154	0.0208928
k__Bacteria; p__Bacteroidetes; c__Bacteroidia; o__Bacteroidales; f__Porphyromonadaceae; g__Parabacteroides; s__Parabacteroides_johnsonii	2.17421	non-COVID	2.38229	0.014938	0.0149321	6.46154e-05	0.00144965
k__Bacteria; p__Proteobacteria; c__Betaproteobacteria; o__Burkholderiales; f__Oxalobacteraceae; g__Oxalobacter; s__Oxalobacter_formigenes	2.5044	non-COVID	2.26821	0.0238538	0.0319405	0.000160769	0.000173793
k__Bacteria; p__Firmicutes; c__Clostridia; o__Clostridiales; f__Lachnospiraceae; g__Anaerostipes; s__Anaerostipes_hadrus	2.75502	non-COVID	2.23596	0.00612282	0.0568254	0.116412	0.0087269
k__Bacteria; p__Actinobacteria; c__Actinobacteria; o__Actinomycetales; f__Micrococcaceae; g__Rothia; s__Rothia_mucilaginosa	2.56131	non-COVID	2.18232	0.00842827	0.0364078	0.0388623	0.0161931
k__Bacteria; p__Firmicutes; c__Bacilli; o__Lactobacillales; f__Streptococcaceae; g__Streptococcus; s__Streptococcus_infantis	2.24916	non-COVID	2.15565	0.00586043	0.0177417	0.0307654	0.00847828
k__Bacteria; p__Firmicutes; c__Negativicutes; o__Selenomonadales; f__Veillonellaceae; g__Megamonas; s__Megamonas_funiformis	3.69404			-	0.0343465	0.0507677	0.692383
k__Bacteria; p__Proteobacteria; c__Gammaproteobacteria; o__Enterobacteriales; f__Enterobacteriaceae; g__Escherichia; s__Escherichia_coli	4.37305			-	2.3591	0.418134	2.13705
k__Bacteria; p__Bacteroidetes; c__Bacteroidia; o__Bacteroidales; f__Bacteroidaceae; g__Bacteroides; s__Bacteroides_plebeius	3.37482			-	0.236537	0.0791715	0.0524365
k__Bacteria; p__Actinobacteria; c__Actinobacteria; o__Bifidobacteriales; f__Bifidobacteriaceae; g__Bifidobacterium; s__Bifidobacterium_minimum	0			-	0	0	8.62069e-06
k__Bacteria; p__Firmicutes; c__Clostridia; o__Clostridiales; f__Eubacteriaceae; g__Eubacterium; s__Eubacterium_brachy	0.975683			-	0.000945256	0.00140154	0.000136552
k__Bacteria; p__Actinobacteria; c__Actinobacteria; o__Actinomycetales; f__Corynebacteriaceae; g__Corynebacterium; s__Corynebacterium_propinquum	0			-	0	0	0
k__Bacteria; p__Actinobacteria; c__Actinobacteria; o__Actinomycetales; f__Actinomycetaceae; g__Mobiluncus; s__Mobiluncus_unclassified	0.281519			-	0.000191154	0	0
k__Bacteria; p__Actinobacteria; c__Actinobacteria; o__Coriobacteriales; f__Coriobacteriaceae; g__Eggerthella; s__Eggerthella_unclassified	3.78133			-	0.604164	0.459673	0.350217
k__Bacteria; p__Actinobacteria; c__Actinobacteria; o__Actinomycetales; f__Actinomycetaceae; g__Actinomyces; s__Actinomyces_georgiae	0			-	5.1282e-05	0	0
k__Bacteria; p__Actinobacteria; c__Actinobacteria; o__Actinomycetales; f__Actinomycetaceae; g__Actinomyces; s__Actinomyces_sp_ph3	0			-	0	0	0
k__Bacteria; p__Firmicutes; c__Bacilli; o__Lactobacillales; f__Leuconostocaceae; g__Leuconostoc; s__Leuconostoc_lactis	1.76457			-	0.00541231	0.0179177	0.000383448
k__Bacteria; p__Proteobacteria; c__Gammaproteobacteria; o__Pasteurellales; f__Pasteurellaceae; g__Aggregatibacter; s__Aggregatibacter_aphrophilus	1.07791			-	0	0.00386	0
k__Bacteria; p__Firmicutes; c__Bacilli; o__Lactobacillales; f__Streptococcaceae; g__Streptococcus; s__Streptococcus_vestibularis	2.75467			-	0.0164267	0.0335215	0.0672838
k__Bacteria; p__Firmicutes; c__Clostridia; o__Clostridiales; f__Lachnospiraceae; g__Lachnospiraceae_noname; s__Lachnospiraceae_bacterium_2_1_58FAA	3.18094			-	0.15165	0.161168	0.0264979
k__Bacteria; p__Firmicutes; c__Bacilli; o__Lactobacillales; f__Streptococcaceae; g__Streptococcus; s__Streptococcus_parasanguinis	3.49154			-	0.221031	0.350039	0.291959
k__Bacteria; p__Actinobacteria; c__Actinobacteria; o__Actinomycetales; f__Corynebacteriaceae; g__Corynebacterium; s__Corynebacterium_matruchotii	0			-	2e-05	0	0
k__Bacteria; p__Firmicutes; c__Erysipelotrichia; o__Erysipelotrichales; f__Erysipelotrichaceae; g__Solobacterium; s__Solobacterium_moorei	1.5384			-	0.00345359	0.00413923	0.00171448
k__Bacteria; p__Proteobacteria; c__Betaproteobacteria; o__Neisseriales; f__Neisseriaceae; g__Neisseria; s__Neisseria_meningitidis	0			-	0	0	0
k__Bacteria; p__Bacteroidetes; c__Bacteroidia; o__Bacteroidales; f__Bacteroidaceae; g__Bacteroides; s__Bacteroides_dorei	4.32452			-	0.737729	0.862332	2.66609
k__Bacteria; p__Actinobacteria; c__Actinobacteria; o__Actinomycetales; f__Actinomycetaceae; g__Varibaculum; s__Varibaculum_cambriense	0			-	8.14103e-05	2.15385e-05	1.17241e-05
k__Bacteria; p__Firmicutes; c__Bacilli; o__Lactobacillales; f__Streptococcaceae; g__Streptococcus; s__Streptococcus_dysgalactiae	0			-	3.5641e-05	0	0
k__Bacteria; p__Firmicutes; c__Negativicutes; o__Selenomonadales; f__Veillonellaceae; g__Dialister; s__Dialister_invisus	3.04472			-	0.0956739	0.178901	0.0803252
k__Bacteria; p__Actinobacteria; c__Actinobacteria; o__Coriobacteriales; f__Coriobacteriaceae; g__Olsenella; s__Olsenella_uli	1.76534			-	0.00120077	0.00126615	0.00786793
k__Bacteria; p__Actinobacteria; c__Actinobacteria; o__Bifidobacteriales; f__Bifidobacteriaceae; g__Bifidobacterium; s__Bifidobacterium_breve	1.13482			-	0.00136397	0	0
k__Bacteria; p__Actinobacteria; c__Actinobacteria; o__Actinomycetales; f__Dermabacteraceae; g__Brachybacterium; s__Brachybacterium_unclassified	0			-	2.05128e-06	0	0
k__Bacteria; p__Bacteroidetes; c__Bacteroidia; o__Bacteroidales; f__Porphyromonadaceae; g__Porphyromonas; s__Porphyromonas_uenonis	1.29283			-	0.00196231	0	0
[truncated: 403 more rows]
